# Supplementary material for: Establishment and Validation of Novel Prognostic Subtypes in Hepatocellular Carcinoma Based on Bile Acid Metabolism Gene Signatures Using Bulk and Single-Cell RNA-Seq Data
Source: Int J Mol Sci. 2024 Jan 11;25(2):919. doi: 10.3390/ijms25020919 (PMC10815120; doi:10.3390/ijms25020919)
Supplement: Supplementary file 1 [file ijms-25-00919-s001.zip]

Archive with 15 entries (15 files):
- Caption of Supplementary materials.pdf
- FS1.pdf
- FS2.pdf
- FS3.pdf
- FS4.pdf
- FS5.pdf
- FS6.pdf
- Table S1.xlsx
- Table S2.xlsx
- Table S3.xlsx
- Table S4.xlsx
- Table S5.xlsx
- Table S6.xlsx
- Table S7.xlsx
- Table S8.xlsx
