# Supplementary material for: Establishment and Validation of Novel Prognostic Subtypes in Hepatocellular Carcinoma Based on Bile Acid Metabolism Gene Signatures Using Bulk and Single-Cell RNA-Seq Data
Source: Int J Mol Sci. 2024 Jan 11;25(2):919. doi: 10.3390/ijms25020919 (PMC10815120; doi:10.3390/ijms25020919)
Supplement: Supplementary file 1 [file ijms-25-00919-s001.zip › Table S1.xlsx]

## Sheet: Table S1A
Supplementary Table S1A: 95 BAGs (tumor vs. non-tumor)
Gene symbol	log2FoldChange	padj
CYP39A1	-2.46078	8.43483e-16
AKR1D1	-1.92937	8.03382e-10
ALDH8A1	-1.92132	2.62214e-19
ACSL1	-1.83911	4.77377e-21
BBOX1	-1.78318	9.70666e-08
ACAA1	-1.54876	5.86011e-26
EPHX2	-1.53843	9.19063e-19
SLC10A1	-1.53312	3.22291e-06
CYP8B1	-1.53108	9.71819e-06
SLC27A5	-1.52888	2.81138e-09
TTR	-1.52051	7.45383e-09
GNMT	-1.51946	1.19475e-06
HAO1	-1.47002	5.53238e-12
ABCA8	-1.46044	4.80199e-08
CAT	-1.44439	3.7196e-23
HSD17B6	-1.39674	3.36276e-09
SCP2	-1.39377	8.98783e-18
NR1I2	-1.38431	4.2642e-07
NR3C2	-1.37876	4.0256e-16
APOA1	-1.35656	1.35992e-07
SLC27A2	-1.34601	2.40451e-10
MLYCD	-1.2809	5.75512e-23
GC	-1.25049	3.16729e-14
UGT2A1	-1.23214	0.00607239
AGXT	-1.21848	2.11177e-07
ACOX2	-1.15891	1.07859e-10
AR	-1.15798	1.79167e-06
SULT2A1	-1.13931	1.82728e-05
PEX11G	-1.13345	3.97513e-12
NR0B2	-1.08902	1.36965e-06
DGAT2	-1.07695	5.07111e-08
PXMP2	-1.07677	1.26913e-11
PHYH	-1.00295	5.87289e-10
PIPOX	-0.992014	1.78299e-07
ABCA1	-0.989462	5.83752e-15
ABCA6	-0.935873	1.83517e-05
ISOC1	-0.930392	1.02475e-18
ALDH9A1	-0.928899	4.67152e-17
LONP2	-0.919837	6.49047e-15
ABCA9	-0.914303	2.51645e-05
SULT1B1	-0.892583	0.00271886
ABCG4	-0.891259	8.63176e-05
ABCB11	-0.884616	0.00615828
CYP27A1	-0.866849	2.96597e-06
ABCD3	-0.853153	9.70221e-19
PEX13	-0.811472	1.19903e-34
TNF	-0.796653	0.001891
PROX1	-0.777831	1.49223e-07
SIRT1	-0.770223	1.91865e-12
CIDEB	-0.766984	0.000533565
PECR	-0.728986	6.62642e-07
NR1H4	-0.706278	1.75899e-09
AQP9	-0.704916	0.0225751
CYP7B1	-0.704236	0.000489224
RETSAT	-0.686982	1.00047e-07
ABCG8	-0.686376	0.0028223
SERPINA6	-0.684475	0.000232278
IDH2	-0.667673	5.45894e-07
ABCB4	-0.666751	0.00779232
PNPLA8	-0.655536	1.05242e-10
BAAT	-0.654129	0.00182381
SOD1	-0.645015	9.21944e-06
OSBPL6	-0.639766	0.00121239
DIO1	-0.631786	0.0153195
ACSL5	-0.630986	0.0044444
BMP6	-0.613228	0.0313133
ABCG5	-0.61238	0.00332506
PRKAA1	-0.605246	7.0415e-12
NUDT12	-0.604676	0.000115498
NR1D1	-0.601449	0.000157885
DIO2	4.11754	4.46311e-23
FGF19	2.63206	2.41236e-07
SLC51B	2.35189	9.82555e-15
SOAT2	2.02189	4.68835e-08
CYP7A1	1.83769	5.00036e-07
OSBPL3	1.75935	4.45019e-29
LEP	1.42746	0.0126385
ABCA3	1.37378	2.83449e-10
STAR	1.33076	0.00028879
RXRG	1.30225	0.00171367
SULT2B1	1.21452	0.00109558
ABCA4	1.17983	4.5049e-08
MALRD1	1.03025	0.0077447
TFCP2L1	0.976118	0.00231273
ABCD1	0.9542	1.31169e-13
OSBPL7	0.879317	5.79572e-07
GNPAT	0.864475	2.5172e-21
VDR	0.822876	0.000380192
FGFR4	0.76851	1.11895e-06
EFHC1	0.760311	2.83801e-10
SLC29A1	0.73261	8.59712e-07
NPC1	0.703465	8.28803e-13
FADS1	0.679115	0.00502964
PFKM	0.627754	0.000868171
AKR1C1	0.592759	0.0114841

## Sheet: Table S1B
Supplementary Table S1B: Bile acid metabolism related gene sets
Gene sets for screening BAGs
GOBP_BILE_ACID_SECRETION	ABCB11	ABCB4	CASR	CES1	MIR33A	PRKAA1	SLC10A1	SLC51A	SLC51B	SLC9A3R1	TNF	UGT1A3
GOBP_BILE_ACID_SIGNALING_PATHWAY	ABCB11	ABCG5	ABCG8	CIDEB	CYP7A1	CYP8B1	DGAT2	GPBAR1	NR1H4	PRKAA1	SLC10A1	VDR
KEGG_PRIMARY_BILE_ACID_BIOSYNTHESIS	ACOX2	AKR1C4	AKR1D1	AMACR	BAAT	CH25H	CYP27A1	CYP39A1	CYP46A1	CYP7A1	CYP7B1	CYP8B1	HSD17B4	HSD3B7	SCP2	SLC27A5
GOBP_BILE_ACID_BIOSYNTHETIC_PROCESS	ABCB11	ABCD3	ACOT8	AKR1C4	AKR1D1	AMACR	BAAT	CES1	CYP27A1	CYP39A1	CYP46A1	CYP7A1	CYP7B1	CYP8B1	FGF19	FGFR4	HSD17B10	HSD3B7	MALRD1	MIR33A	NR1D1	NR1H4	OSBP	OSBPL1A	OSBPL2	OSBPL3	OSBPL6	OSBPL7	OSBPL9	PROX1	SCP2	SIRT1	SLC27A2	SLC27A5	STAR	STARD4
GOBP_BILE_ACID_METABOLIC_PROCESS	ABCB11	ABCD3	ACAA1	ACOT8	AKR1C1	AKR1C4	AKR1D1	AMACR	ARV1	ATP8B1	BAAT	CES1	CYP27A1	CYP39A1	CYP46A1	CYP7A1	CYP7B1	CYP8B1	FGF19	FGFR4	GBA2	HSD17B10	HSD3B7	KIT	LEP	MALRD1	MIR33A	NPC1	NR1D1	NR1H4	NR5A2	OSBP	OSBPL1A	OSBPL2	OSBPL3	OSBPL6	OSBPL7	OSBPL9	PANK2	PROX1	SCP2	SIRT1	SLC27A2	SLC27A5	STAR	STARD4	SULT2A1	UGT2A1	UGT2A2
HALLMARK_BILE_ACID_METABOLISM	ABCA1	ABCA2	ABCA3	ABCA4	ABCA5	ABCA6	ABCA8	ABCA9	ABCD1	ABCD2	ABCD3	ABCG4	ABCG8	ACSL1	ACSL5	AGXT	AKR1D1	ALDH1A1	ALDH8A1	ALDH9A1	AMACR	APOA1	AQP9	AR	ATXN1	BBOX1	BCAR3	BMP6	CAT	CH25H	CROT	CYP27A1	CYP39A1	CYP46A1	CYP7A1	CYP7B1	CYP8B1	DHCR24	DIO1	DIO2	EFHC1	EPHX2	FADS1	FADS2	FDXR	GC	GCLM	GNMT	GNPAT
BAM gen set
BAM	ABCB11	ABCD3	AKR1D1	BAAT	CYP27A1	CYP39A1	CYP7A1	CYP7B1	CYP8B1	FGF19	FGFR4	MALRD1	NR1D1	NR1H4	OSBPL3	OSBPL6	OSBPL7	PROX1	SCP2	SIRT1	SLC27A2	SLC27A5	STAR	ACAA1	AKR1C1	LEP	NPC1	SULT2A1	UGT2A1	ABCG5	ABCG8	CIDEB	DGAT2	PRKAA1	SLC10A1	VDR	ABCB4	SLC51B	TNF	ABCA1	ABCA3	ABCA4	ABCA6	ABCA8	ABCA9	ABCD1	ABCG4	ACSL1	ACSL5
[truncated: 63 more columns]

## Sheet: Table S1C
Supplementary Table S1C: 153 CCGs (tumor vs. non-tumor)
Gene symbol	log2FoldChange	padj
ATF5	-1.30349	3.23102e-06
MT2A	-2.46148	1.10591e-16
YWHAZ	0.618716	6.6727e-08
PSMB4	0.745392	1.68887e-14
PSMD4	1.06985	1.98234e-21
CDKN1A	-0.724299	5.29229e-05
ILF3	0.832423	1.21057e-35
RAD21	0.608999	2.64533e-10
CDK5RAP3	0.7669	8.1482e-15
PRKDC	0.789052	2.8917e-12
PSMC4	0.653578	4.34138e-14
SQLE	1.61571	2.64898e-16
MARCKS	0.659644	1.22055e-05
MCM7	1.47785	1.80596e-27
HMGA1	1.70102	1.26157e-24
STMN1	2.10333	8.4389e-45
MCM3	1.52768	2.22639e-35
BCL3	-0.879229	1.58949e-09
GADD45A	-0.984385	4.32531e-10
KPNA2	1.41453	1.98044e-28
MCM5	1.39391	3.17771e-27
MYC	-1.20695	7.51552e-09
CDC25B	1.00909	1.62145e-12
DDX39A	1.45474	1.53405e-33
MCM4	1.60769	7.46343e-30
TAOK2	0.692566	1.84947e-23
TOP2A	3.90008	9.24605e-78
INTS3	0.669062	1.15798e-08
CDK4	0.6464	3.1591e-09
SLC38A1	1.00629	2.98928e-05
KIF22	0.611953	1.97138e-07
TGFB1	0.589191	0.00572722
DMD	-1.31183	5.48356e-16
WEE1	-1.18548	7.42873e-19
MCM2	2.38702	1.39165e-42
CDC14B	-0.843321	2.5156e-07
MKI67	3.35479	5.21023e-64
MCM6	1.72826	2.51678e-37
CBX1	0.832651	2.16546e-21
UCK2	1.6349	6.23053e-45
MDC1	0.661404	6.09838e-11
SNRPD1	0.735572	2.73842e-11
TPX2	2.10039	8.10154e-32
SFN	3.82919	1.31895e-31
PSMD10	0.668842	1.50616e-17
TACC3	2.10912	3.78326e-40
NABP2	0.914864	6.15826e-23
DTYMK	1.30872	3.09277e-27
CENPF	3.8811	3.38467e-87
LMNB1	1.20642	7.11312e-14
BIRC5	4.09346	7.61675e-83
CKS1B	1.22725	5.1429e-27
NUSAP1	2.25239	3.02141e-44
MYBL2	4.5534	2.25948e-74
TOPBP1	0.76383	1.13787e-14
CCNB1	3.26725	1.61125e-75
E2F1	3.67022	3.43925e-69
SMC4	1.25539	2.76773e-12
CDC20	4.27188	4.96442e-80
PRC1	3.21427	1.19151e-77
LIG3	0.593136	2.97265e-15
AURKA	2.67787	2.73814e-61
CDKN2C	2.29419	7.12962e-44
FANCC	-1.06407	1.66262e-12
CKS2	1.33582	5.30655e-19
CHAF1A	1.45547	1.86141e-36
ARID4A	-0.848875	4.61919e-15
PTTG1	3.72751	1.61125e-75
RASAL2	0.692311	4.93185e-07
RACGAP1	2.41069	1.43951e-63
CDK1	3.47889	3.48447e-74
UBE2C	4.10486	3.51078e-76
RFC4	1.72643	1.94676e-42
SUV39H1	0.888391	2.87434e-17
UBE2S	1.96466	3.40604e-33
RNF168	-0.604374	1.36476e-13
RNF8	0.700366	1.08882e-16
E2F3	0.677302	3.32794e-07
CCNA2	3.50214	2.39922e-57
DONSON	0.945724	2.17742e-18
CDC6	3.20112	2.62794e-62
SMC2	0.900997	2.6705e-13
POLA2	1.27967	8.50017e-30
RAD9A	0.94959	1.97872e-23
EZH2	2.3956	4.33333e-63
PLK1	3.53746	7.85988e-69
RHNO1	1.13761	8.38858e-30
KIF4A	3.90747	1.68637e-82
TRIM39	0.590398	3.68054e-13
DTL	3.25745	6.60932e-64
ESPL1	1.36278	3.84491e-11
SLC7A1	0.94175	0.000130871
KIF2C	3.93143	6.69766e-79
CCNB2	3.72208	2.65868e-80
CHEK2	0.971256	1.66427e-09
INCENP	1.25608	1.30482e-21
TROAP	4.21476	1.34152e-86
HMMR	3.22876	2.41897e-67
KIF11	2.19649	4.60525e-40
RFC3	1.05178	4.18555e-17
MCM8	1.34383	1.57028e-22
CDKN3	3.90163	8.06965e-91
CCNF	2.17944	5.63997e-48
MAD2L1	2.16526	1.35083e-40
AURKB	3.56442	1.30209e-64
BRCA1	0.734837	1.15467e-06
BUB1	3.4951	7.68408e-74
NEK2	3.93292	2.93713e-81
GINS2	1.77547	1.65636e-25
PRIM2	1.1568	1.55763e-35
CHEK1	1.64891	4.15669e-31
NDC80	3.306	1.86397e-74
KIF23	3.29084	3.05635e-58
RMI2	1.93069	1.73771e-23
PKMYT1	3.16094	1.73243e-66
CDC45	3.07639	9.57258e-58
PBK	3.388	9.82484e-59
KIF20B	0.989732	7.80612e-13
RBL1	1.25735	1.63878e-19
DBF4	0.894773	1.28435e-15
CENPE	3.14697	2.99357e-61
TTK	3.77626	3.1824e-68
GTSE1	3.53189	5.85569e-64
BRIP1	1.40295	3.56737e-16
EXO1	3.60118	1.68196e-74
SAP30	0.605746	2.52449e-07
STIL	2.37561	1.27273e-47
CDC25C	4.34269	2.14042e-89
CDC7	2.05544	2.818e-35
CDC25A	2.13836	4.85595e-27
ORC1	2.9169	2.93224e-51
MCM10	3.03473	3.13908e-45
BARD1	1.25754	9.05197e-17
KIF15	3.35465	7.21313e-54
DNA2	1.36214	3.48031e-21
TRAIP	2.81133	6.1306e-61
EFNA5	1.24635	0.00149479
BLM	2.44783	2.47944e-36
ORC6	2.84824	3.14205e-48
BRCA2	1.32018	1.62929e-17
CENPA	4.09826	1.3034e-73
POLQ	2.99151	3.43484e-48
PLK4	2.1313	4.66881e-36
E2F2	2.9932	1.02465e-48
TICRR	3.65699	5.18719e-62
RAD54L	3.36032	1.14196e-48
BRSK1	1.77183	2.69001e-24
CLSPN	2.80265	3.75954e-33
EGF	4.76677	8.13258e-20
HOXC10	3.72413	1.62826e-06
MYT1	1.40956	2.04438e-05
PSMA8	1.59583	0.0129897
ATRIP	0.727786	0.00208601

## Sheet: Table S1D
Supplementary Table S1D: cell cycle related gene sets
Gene sets for screening CCGs
HALLMARK_G2M_CHECKPOINT	ABL1	AMD1	ARID4A	ATF5	ATRX	AURKA	AURKB	BARD1	BCL3	BIRC5	BRCA2	BUB1	BUB3	CASP8AP2	CBX1	CCNA2	CCNB2	CCND1	CCNF	CCNT1	CDC20	CDC25A	CDC25B	CDC27	CDC45	CDC6	CDC7	CDK1	CDK4	CDKN1B	CDKN2C	CDKN3	CENPA	CENPE	CENPF	CHAF1A	CHEK1	CHMP1A	CKS1B	CKS2	CTCF	CUL1	CUL3	CUL4A	CUL5	DBF4	DDX39A	DKC1	DMD
REACTOME_G2_M_DNA_REPLICATION_CHECKPOINT	CCNB1	CCNB2	CDK1	PKMYT1	WEE1
REACTOME_G2_M_CHECKPOINTS	ABRAXAS1	ATM	ATR	ATRIP	BABAM1	BABAM2	BARD1	BLM	BRCA1	BRCC3	BRIP1	CCNB1	CCNB2	CDC25A	CDC25C	CDC45	CDC6	CDC7	CDK1	CDK2	CHEK1	CHEK2	CLSPN	DBF4	DNA2	EXO1	GTSE1	H2AX	H2BC1	H2BC10	H2BC11	H2BC12	H2BC12L	H2BC13	H2BC14	H2BC15	H2BC17	H2BC21	H2BC3	H2BC4	H2BC5	H2BC6	H2BC7	H2BC8	H2BC9	H2BU1	H3-4	H4-16	H4C1
BIOCARTA_G2_PATHWAY	ATM	ATR	BRCA1	CCNB1	CDC25A	CDC25B	CDC25C	CDC34	CDK1	CDKN1A	CDKN2D	CHEK1	CHEK2	EP300	GADD45A	MDM2	MYT1	PLK1	PRKDC	RPS6KA1	TP53	WEE1	YWHAH	YWHAQ
GOBP_MITOTIC_G2_M_TRANSITION_CHECKPOINT	ABRAXAS1	ATM	BABAM1	BABAM2	BARD1	BLM	BRCA1	BRCC3	BRSK1	CCNG1	CDC14B	CDC6	CDK1	CDK5RAP3	CDKN1A	CHEK1	CHFR	CLSPN	DONSON	DTL	FOXN3	FOXO4	FZR1	HUS1	HUS1B	INIP	INTS3	MRE11	MRNIP	NABP1	NABP2	NAE1	NBN	NOP53	ORC1	PABIR1	PLK1	RAD17	RAD50	RBBP8	RINT1	SYF2	TAOK1	TAOK2	TAOK3	TICRR	TOPBP1	TRIM39	UIMC1
Cell cycle gen set
cell cycle	ATF5	MT2A	YWHAZ	PSMB4	PSMD4	CDKN1A	ILF3	RAD21	CDK5RAP3	PRKDC	PSMC4	SQLE	MARCKS	MCM7	HMGA1	STMN1	MCM3	BCL3	GADD45A	KPNA2	MCM5	MYC	CDC25B	DDX39A	MCM4	TAOK2	TOP2A	INTS3	CDK4	SLC38A1	KIF22	TGFB1	DMD	WEE1	MCM2	CDC14B	MKI67	MCM6	CBX1	UCK2	MDC1	SNRPD1	TPX2	SFN	PSMD10	TACC3	NABP2	DTYMK	CENPF
[truncated: 151 more columns]
