# Supplementary material for: Establishment and Validation of Novel Prognostic Subtypes in Hepatocellular Carcinoma Based on Bile Acid Metabolism Gene Signatures Using Bulk and Single-Cell RNA-Seq Data
Source: Int J Mol Sci. 2024 Jan 11;25(2):919. doi: 10.3390/ijms25020919 (PMC10815120; doi:10.3390/ijms25020919)
Supplement: Supplementary file 1 [file ijms-25-00919-s001.zip › Table S2.xlsx]

## Sheet: Table S2-1
Supplementary Table S2: Results of differential pathways analysis conducted by limma (C2 vs. C1)
Gene sets	logFC	adj.P.Val
BAM	0.742796	2.17398e-63
KEGG_GLYCINE_SERINE_AND_THREONINE_METABOLISM	0.811773	6.42236e-53
KEGG_RETINOL_METABOLISM	0.660092	6.01971e-48
KEGG_PPAR_SIGNALING_PATHWAY	0.526444	6.01971e-48
KEGG_DRUG_METABOLISM_CYTOCHROME_P450	0.623365	2.1247e-46
KEGG_PEROXISOME	0.566369	1.66508e-44
HALLMARK_XENOBIOTIC_METABOLISM	0.494568	7.85588e-43
KEGG_TRYPTOPHAN_METABOLISM	0.653991	3.08291e-42
KEGG_FATTY_ACID_METABOLISM	0.810805	5.29406e-42
KEGG_STEROID_HORMONE_BIOSYNTHESIS	0.469187	1.73685e-38
KEGG_BETA_ALANINE_METABOLISM	0.690701	4.51565e-38
KEGG_DRUG_METABOLISM_OTHER_ENZYMES	0.518473	7.43491e-38
KEGG_METABOLISM_OF_XENOBIOTICS_BY_CYTOCHROME_P450	0.592622	4.89906e-37
KEGG_TYROSINE_METABOLISM	0.490216	1.00236e-36
KEGG_BUTANOATE_METABOLISM	0.641726	3.58518e-36
KEGG_HISTIDINE_METABOLISM	0.527718	8.39336e-36
HALLMARK_FATTY_ACID_METABOLISM	0.437096	3.17436e-30
KEGG_LINOLEIC_ACID_METABOLISM	0.472824	2.60791e-28
KEGG_VALINE_LEUCINE_AND_ISOLEUCINE_DEGRADATION	0.622236	1.70993e-26
KEGG_BIOSYNTHESIS_OF_UNSATURATED_FATTY_ACIDS	0.527161	3.24596e-26
KEGG_PROPANOATE_METABOLISM	0.569308	6.07873e-26
HALLMARK_PEROXISOME	0.33445	1.08622e-25
KEGG_PYRUVATE_METABOLISM	0.392805	1.45246e-25
KEGG_ARGININE_AND_PROLINE_METABOLISM	0.425646	6.2524e-25
KEGG_STARCH_AND_SUCROSE_METABOLISM	0.350767	1.23831e-24
KEGG_ASCORBATE_AND_ALDARATE_METABOLISM	0.551745	3.06362e-24
KEGG_PENTOSE_AND_GLUCURONATE_INTERCONVERSIONS	0.48549	1.73513e-22
KEGG_ALANINE_ASPARTATE_AND_GLUTAMATE_METABOLISM	0.418786	4.16575e-22
KEGG_COMPLEMENT_AND_COAGULATION_CASCADES	0.395851	2.14912e-21
KEGG_PHENYLALANINE_METABOLISM	0.416157	1.27715e-18
KEGG_NITROGEN_METABOLISM	0.334548	2.61794e-17
KEGG_GLYOXYLATE_AND_DICARBOXYLATE_METABOLISM	0.374627	4.1639e-17
KEGG_GLYCOLYSIS_GLUCONEOGENESIS	0.278549	6.03945e-17
KEGG_PATHOGENIC_ESCHERICHIA_COLI_INFECTION	-0.278627	1.33764e-16
KEGG_NOTCH_SIGNALING_PATHWAY	-0.32158	1.47462e-16
KEGG_PORPHYRIN_AND_CHLOROPHYLL_METABOLISM	0.359685	2.81362e-16
KEGG_FC_GAMMA_R_MEDIATED_PHAGOCYTOSIS	-0.399782	2.88706e-16
KEGG_ABC_TRANSPORTERS	0.209546	4.18055e-16
KEGG_VASOPRESSIN_REGULATED_WATER_REABSORPTION	-0.362547	5.42341e-16
KEGG_BLADDER_CANCER	-0.319545	5.42341e-16
KEGG_SPLICEOSOME	-0.32975	2.05403e-15
HALLMARK_COAGULATION	0.288215	3.55865e-15
KEGG_LYSINE_DEGRADATION	0.327157	9.90049e-15
HALLMARK_NOTCH_SIGNALING	-0.336521	2.26229e-14
KEGG_ENDOCYTOSIS	-0.208537	2.29146e-14
KEGG_ARACHIDONIC_ACID_METABOLISM	0.255166	2.80816e-14
KEGG_VIBRIO_CHOLERAE_INFECTION	-0.244576	3.02385e-14
KEGG_WNT_SIGNALING_PATHWAY	-0.272346	4.07166e-14
KEGG_GLYCOSAMINOGLYCAN_BIOSYNTHESIS_CHONDROITIN_SULFATE	-0.374521	9.5079e-14
HALLMARK_MYC_TARGETS_V1	-0.358237	1.6192e-13
KEGG_PANCREATIC_CANCER	-0.35785	1.83524e-13
KEGG_EPITHELIAL_CELL_SIGNALING_IN_HELICOBACTER_PYLORI_INFECTION	-0.270553	2.11195e-13
HALLMARK_ADIPOGENESIS	0.243653	2.65464e-13
KEGG_STEROID_BIOSYNTHESIS	0.423539	5.81209e-13
HALLMARK_WNT_BETA_CATENIN_SIGNALING	-0.274563	7.02877e-13
KEGG_RENIN_ANGIOTENSIN_SYSTEM	0.308209	1.53521e-12
KEGG_ONE_CARBON_POOL_BY_FOLATE	0.248149	1.86735e-12
HALLMARK_PI3K_AKT_MTOR_SIGNALING	-0.267955	4.7486e-12
KEGG_NEUROTROPHIN_SIGNALING_PATHWAY	-0.306784	8.86425e-12
KEGG_CHRONIC_MYELOID_LEUKEMIA	-0.329721	1.05521e-11
KEGG_RENAL_CELL_CARCINOMA	-0.356031	1.06548e-11
KEGG_ERBB_SIGNALING_PATHWAY	-0.291753	1.15877e-11
KEGG_CELL_CYCLE	-0.366256	1.44241e-11
KEGG_OLFACTORY_TRANSDUCTION	0.100758	1.44241e-11
KEGG_PATHWAYS_IN_CANCER	-0.262673	1.64477e-11
KEGG_CYSTEINE_AND_METHIONINE_METABOLISM	0.227424	1.89263e-11
KEGG_MTOR_SIGNALING_PATHWAY	-0.293529	2.25278e-11
KEGG_MATURITY_ONSET_DIABETES_OF_THE_YOUNG	0.246395	2.32824e-11
KEGG_GNRH_SIGNALING_PATHWAY	-0.245496	2.53438e-11
KEGG_AXON_GUIDANCE	-0.276398	2.73926e-11
KEGG_REGULATION_OF_ACTIN_CYTOSKELETON	-0.26361	2.99475e-11
HALLMARK_MITOTIC_SPINDLE	-0.358291	4.20049e-11
KEGG_RNA_DEGRADATION	-0.223565	4.47959e-11
KEGG_MAPK_SIGNALING_PATHWAY	-0.196269	5.52089e-11
HALLMARK_G2M_CHECKPOINT	-0.433229	6.35359e-11
HALLMARK_TGF_BETA_SIGNALING	-0.325443	6.4035e-11
KEGG_SMALL_CELL_LUNG_CANCER	-0.274263	1.26383e-10
HALLMARK_DNA_REPAIR	-0.277543	1.37451e-10
KEGG_BASAL_CELL_CARCINOMA	-0.246218	1.59356e-10
KEGG_MELANOGENESIS	-0.22118	1.64083e-10
KEGG_PURINE_METABOLISM	-0.179273	1.75956e-10
KEGG_GAP_JUNCTION	-0.208115	2.15863e-10
KEGG_COLORECTAL_CANCER	-0.309865	2.26794e-10
HALLMARK_HEDGEHOG_SIGNALING	-0.308171	2.7865e-10
KEGG_GLYCOSAMINOGLYCAN_BIOSYNTHESIS_KERATAN_SULFATE	-0.301705	3.63487e-10
KEGG_ADHERENS_JUNCTION	-0.269139	4.14921e-10
KEGG_SNARE_INTERACTIONS_IN_VESICULAR_TRANSPORT	-0.287732	4.69178e-10
KEGG_HYPERTROPHIC_CARDIOMYOPATHY_HCM	-0.243883	4.87398e-10
KEGG_NOD_LIKE_RECEPTOR_SIGNALING_PATHWAY	-0.247076	5.21457e-10
KEGG_TGF_BETA_SIGNALING_PATHWAY	-0.236617	6.76379e-10
KEGG_PANTOTHENATE_AND_COA_BIOSYNTHESIS	0.247685	7.74233e-10
KEGG_VEGF_SIGNALING_PATHWAY	-0.211605	8.0209e-10
KEGG_PROGESTERONE_MEDIATED_OOCYTE_MATURATION	-0.247624	9.98562e-10
KEGG_BASAL_TRANSCRIPTION_FACTORS	-0.225981	1.22995e-09
KEGG_HEDGEHOG_SIGNALING_PATHWAY	-0.234573	1.40674e-09
KEGG_OOCYTE_MEIOSIS	-0.233844	1.87216e-09
KEGG_RNA_POLYMERASE	-0.289377	2.15159e-09
KEGG_LEISHMANIA_INFECTION	-0.104932	2.82514e-09
KEGG_DILATED_CARDIOMYOPATHY	-0.239954	2.92874e-09
HALLMARK_UNFOLDED_PROTEIN_RESPONSE	-0.277591	2.95885e-09
KEGG_PHOSPHATIDYLINOSITOL_SIGNALING_SYSTEM	-0.271962	3.10686e-09
KEGG_UBIQUITIN_MEDIATED_PROTEOLYSIS	-0.317561	3.10686e-09
KEGG_FOCAL_ADHESION	-0.250209	3.21434e-09
HALLMARK_CHOLESTEROL_HOMEOSTASIS	0.231266	5.48672e-09
KEGG_TERPENOID_BACKBONE_BIOSYNTHESIS	0.362231	5.96651e-09
KEGG_HOMOLOGOUS_RECOMBINATION	-0.353799	7.23759e-09
HALLMARK_MYC_TARGETS_V2	-0.340424	7.5333e-09
KEGG_NON_HOMOLOGOUS_END_JOINING	-0.366662	7.92241e-09
KEGG_RIG_I_LIKE_RECEPTOR_SIGNALING_PATHWAY	-0.191055	8.70061e-09
KEGG_DORSO_VENTRAL_AXIS_FORMATION	-0.222313	1.07696e-08
KEGG_PROXIMAL_TUBULE_BICARBONATE_RECLAMATION	0.210427	1.28225e-08
KEGG_T_CELL_RECEPTOR_SIGNALING_PATHWAY	-0.248569	1.28225e-08
KEGG_NON_SMALL_CELL_LUNG_CANCER	-0.210383	1.28225e-08
HALLMARK_PROTEIN_SECRETION	-0.311842	1.28225e-08
KEGG_GLYCOSAMINOGLYCAN_BIOSYNTHESIS_HEPARAN_SULFATE	-0.220441	1.30439e-08
KEGG_LONG_TERM_POTENTIATION	-0.203527	1.86344e-08
HALLMARK_APICAL_JUNCTION	-0.183674	2.25698e-08
HALLMARK_E2F_TARGETS	-0.350784	3.07823e-08
KEGG_GLIOMA	-0.206001	3.21673e-08
HALLMARK_APICAL_SURFACE	-0.21534	4.12907e-08
KEGG_NUCLEOTIDE_EXCISION_REPAIR	-0.252019	4.4115e-08
KEGG_ARRHYTHMOGENIC_RIGHT_VENTRICULAR_CARDIOMYOPATHY_ARVC	-0.238215	4.9584e-08
KEGG_O_GLYCAN_BIOSYNTHESIS	-0.215807	4.9584e-08
KEGG_THYROID_CANCER	-0.203699	4.9584e-08
KEGG_INOSITOL_PHOSPHATE_METABOLISM	-0.263576	5.19492e-08
HALLMARK_PANCREAS_BETA_CELLS	0.146539	1.08214e-07
KEGG_GLUTATHIONE_METABOLISM	0.192479	1.34794e-07
KEGG_APOPTOSIS	-0.200648	1.81476e-07
KEGG_B_CELL_RECEPTOR_SIGNALING_PATHWAY	-0.231042	3.2596e-07
HALLMARK_P53_PATHWAY	-0.150519	5.0239e-07
KEGG_CYTOSOLIC_DNA_SENSING_PATHWAY	-0.179064	5.16863e-07
KEGG_PROSTATE_CANCER	-0.202752	8.55039e-07
KEGG_ACUTE_MYELOID_LEUKEMIA	-0.224334	9.75829e-07
KEGG_LYSOSOME	-0.183207	1.00316e-06
KEGG_ALPHA_LINOLENIC_ACID_METABOLISM	0.167377	1.42381e-06
KEGG_REGULATION_OF_AUTOPHAGY	-0.16776	1.57361e-06
KEGG_FC_EPSILON_RI_SIGNALING_PATHWAY	-0.159171	2.19783e-06
KEGG_CITRATE_CYCLE_TCA_CYCLE	0.267472	2.45563e-06
KEGG_DNA_REPLICATION	-0.339768	2.67358e-06
KEGG_LONG_TERM_DEPRESSION	-0.1453	2.94408e-06
KEGG_PYRIMIDINE_METABOLISM	-0.176609	3.61993e-06
KEGG_MISMATCH_REPAIR	-0.309084	3.82643e-06
KEGG_SULFUR_METABOLISM	0.181901	4.43307e-06
KEGG_TIGHT_JUNCTION	-0.131245	7.62438e-06
HALLMARK_EPITHELIAL_MESENCHYMAL_TRANSITION	-0.262261	1.04934e-05
KEGG_ENDOMETRIAL_CANCER	-0.197957	1.30927e-05
KEGG_BASE_EXCISION_REPAIR	-0.251618	1.44761e-05
KEGG_NICOTINATE_AND_NICOTINAMIDE_METABOLISM	0.155755	1.56978e-05
KEGG_GLYCOSPHINGOLIPID_BIOSYNTHESIS_GLOBO_SERIES	-0.206475	3.12541e-05
HALLMARK_TNFA_SIGNALING_VIA_NFKB	-0.189943	3.22617e-05
KEGG_CHEMOKINE_SIGNALING_PATHWAY	-0.170236	3.63187e-05
KEGG_GLYCEROLIPID_METABOLISM	0.0966913	4.45874e-05
KEGG_ADIPOCYTOKINE_SIGNALING_PATHWAY	0.102379	4.66647e-05
KEGG_LEUKOCYTE_TRANSENDOTHELIAL_MIGRATION	-0.165029	4.84079e-05
HALLMARK_ANGIOGENESIS	-0.225595	5.27149e-05
KEGG_MELANOMA	-0.13222	5.45531e-05
KEGG_SPHINGOLIPID_METABOLISM	-0.117157	5.56817e-05
KEGG_TOLL_LIKE_RECEPTOR_SIGNALING_PATHWAY	-0.15105	6.90354e-05
KEGG_GLYCEROPHOSPHOLIPID_METABOLISM	-0.086033	8.27764e-05
KEGG_HUNTINGTONS_DISEASE	-0.124024	9.18082e-05
KEGG_P53_SIGNALING_PATHWAY	-0.142769	9.572e-05
KEGG_RIBOSOME	-0.2555	0.000108378
KEGG_ECM_RECEPTOR_INTERACTION	-0.145094	0.0001238
KEGG_JAK_STAT_SIGNALING_PATHWAY	-0.151268	0.000134864
KEGG_CARDIAC_MUSCLE_CONTRACTION	-0.141036	0.00014794
HALLMARK_SPERMATOGENESIS	-0.101177	0.000157332
KEGG_GLYCOSPHINGOLIPID_BIOSYNTHESIS_GANGLIO_SERIES	-0.14403	0.000159004
HALLMARK_IL2_STAT5_SIGNALING	-0.141658	0.000222566
HALLMARK_ALLOGRAFT_REJECTION	-0.10141	0.000275229
KEGG_GLYCOSYLPHOSPHATIDYLINOSITOL_GPI_ANCHOR_BIOSYNTHESIS	-0.179874	0.000366624
HALLMARK_MTORC1_SIGNALING	-0.143711	0.000373292
HALLMARK_APOPTOSIS	-0.116265	0.000398779
HALLMARK_INFLAMMATORY_RESPONSE	-0.164006	0.000824843
KEGG_ETHER_LIPID_METABOLISM	-0.105274	0.000909748
KEGG_VIRAL_MYOCARDITIS	-0.0358553	0.00094043
HALLMARK_IL6_JAK_STAT3_SIGNALING	-0.139763	0.000943612
HALLMARK_HYPOXIA	-0.105401	0.00100993
HALLMARK_UV_RESPONSE_DN	-0.15136	0.00122
KEGG_TYPE_I_DIABETES_MELLITUS	-0.0231104	0.00242923
KEGG_AMYOTROPHIC_LATERAL_SCLEROSIS_ALS	-0.0713197	0.00251031
KEGG_TASTE_TRANSDUCTION	-0.0371234	0.00295065
HALLMARK_UV_RESPONSE_UP	-0.0711995	0.00312449
KEGG_RIBOFLAVIN_METABOLISM	-0.142267	0.0031614
KEGG_GLYCOSPHINGOLIPID_BIOSYNTHESIS_LACTO_AND_NEOLACTO_SERIES	-0.0974606	0.00327092
KEGG_CALCIUM_SIGNALING_PATHWAY	-0.0989123	0.00378797
HALLMARK_MYOGENESIS	-0.100824	0.00448092
KEGG_N_GLYCAN_BIOSYNTHESIS	-0.143669	0.00456239
KEGG_ASTHMA	-0.0232627	0.00856594
KEGG_INSULIN_SIGNALING_PATHWAY	-0.0804715	0.00873927
KEGG_PROTEIN_EXPORT	-0.136057	0.0126167
HALLMARK_GLYCOLYSIS	-0.0679146	0.0156229
KEGG_CYTOKINE_CYTOKINE_RECEPTOR_INTERACTION	-0.0957677	0.016671
KEGG_CELL_ADHESION_MOLECULES_CAMS	-0.0435001	0.0185344
KEGG_INTESTINAL_IMMUNE_NETWORK_FOR_IGA_PRODUCTION	-0.0349071	0.02074
KEGG_PROTEASOME	-0.0933901	0.0225862
KEGG_VASCULAR_SMOOTH_MUSCLE_CONTRACTION	-0.0799735	0.032183
KEGG_AMINOACYL_TRNA_BIOSYNTHESIS	-0.0950193	0.0388439
HALLMARK_KRAS_SIGNALING_DN	0.040936	0.042658
KEGG_PRIMARY_IMMUNODEFICIENCY	-0.0892464	0.0432843
KEGG_ALZHEIMERS_DISEASE	-0.0593416	0.0439965
KEGG_NATURAL_KILLER_CELL_MEDIATED_CYTOTOXICITY	-0.0121477	0.0455915
KEGG_TYPE_II_DIABETES_MELLITUS	-0.0577455	0.0479449
HALLMARK_KRAS_SIGNALING_UP	-0.0708576	0.0737017
KEGG_GALACTOSE_METABOLISM	0.0603067	0.0738351
HALLMARK_OXIDATIVE_PHOSPHORYLATION	0.0783269	0.0770746
KEGG_HEMATOPOIETIC_CELL_LINEAGE	-0.0703012	0.0935724
KEGG_SELENOAMINO_ACID_METABOLISM	0.070094	0.101254
HALLMARK_ESTROGEN_RESPONSE_EARLY	-0.0498685	0.106014
KEGG_GLYCOSAMINOGLYCAN_DEGRADATION	-0.0750711	0.121761
KEGG_ALLOGRAFT_REJECTION	-0.0121269	0.124882
KEGG_OTHER_GLYCAN_DEGRADATION	-0.0512194	0.126773
KEGG_ANTIGEN_PROCESSING_AND_PRESENTATION	0.00595008	0.156797
KEGG_AUTOIMMUNE_THYROID_DISEASE	-0.0106181	0.218896
HALLMARK_REACTIVE_OXYGEN_SPECIES_PATHWAY	0.0454278	0.218965
HALLMARK_ESTROGEN_RESPONSE_LATE	-0.0294924	0.228402
KEGG_PENTOSE_PHOSPHATE_PATHWAY	0.04608	0.238614
HALLMARK_INTERFERON_GAMMA_RESPONSE	-0.0388664	0.273024
KEGG_ALDOSTERONE_REGULATED_SODIUM_REABSORPTION	-0.0366347	0.283694
KEGG_SYSTEMIC_LUPUS_ERYTHEMATOSUS	0.0140732	0.288731
KEGG_PARKINSONS_DISEASE	0.0417763	0.305898
KEGG_CIRCADIAN_RHYTHM_MAMMAL	-0.0603442	0.327794
KEGG_AMINO_SUGAR_AND_NUCLEOTIDE_SUGAR_METABOLISM	-0.0318892	0.428557
KEGG_NEUROACTIVE_LIGAND_RECEPTOR_INTERACTION	-0.0218512	0.459604
KEGG_OXIDATIVE_PHOSPHORYLATION	0.0251532	0.527276
KEGG_GRAFT_VERSUS_HOST_DISEASE	-0.00215833	0.585411
HALLMARK_INTERFERON_ALPHA_RESPONSE	-0.0176064	0.64657
HALLMARK_ANDROGEN_RESPONSE	-0.0165998	0.674987
KEGG_FRUCTOSE_AND_MANNOSE_METABOLISM	-0.0127486	0.719335
HALLMARK_COMPLEMENT	-0.00874149	0.802998
HALLMARK_HEME_METABOLISM	-0.00620332	0.837416
KEGG_PRION_DISEASES	-0.00717916	0.84345

## Sheet: Table S2-2
Supplementary Table S2: Results of differential pathways analysis conducted by limma (C2 vs. C3)
Gene sets	logFC	adj.P.Val
BAM	0.445471	6.28874e-48
KEGG_TRYPTOPHAN_METABOLISM	0.435996	2.8142e-36
KEGG_BETA_ALANINE_METABOLISM	0.45859	2.27247e-32
KEGG_GLYCINE_SERINE_AND_THREONINE_METABOLISM	0.418773	3.96871e-31
KEGG_RETINOL_METABOLISM	0.362974	6.31679e-31
KEGG_DRUG_METABOLISM_CYTOCHROME_P450	0.349657	7.20356e-31
KEGG_PEROXISOME	0.326848	7.20356e-31
KEGG_FATTY_ACID_METABOLISM	0.474351	1.35358e-29
HALLMARK_XENOBIOTIC_METABOLISM	0.280399	8.16225e-29
KEGG_TYROSINE_METABOLISM	0.306447	1.3255e-28
KEGG_STARCH_AND_SUCROSE_METABOLISM	0.273441	2.45469e-27
KEGG_VALINE_LEUCINE_AND_ISOLEUCINE_DEGRADATION	0.454945	1.46561e-26
KEGG_BUTANOATE_METABOLISM	0.375475	2.86554e-25
KEGG_PPAR_SIGNALING_PATHWAY	0.248602	2.64954e-24
KEGG_STEROID_HORMONE_BIOSYNTHESIS	0.252687	1.22728e-23
KEGG_DRUG_METABOLISM_OTHER_ENZYMES	0.282248	1.26794e-23
KEGG_PROPANOATE_METABOLISM	0.392153	1.3156e-23
KEGG_METABOLISM_OF_XENOBIOTICS_BY_CYTOCHROME_P450	0.318384	1.38082e-22
HALLMARK_FATTY_ACID_METABOLISM	0.264414	2.97799e-22
KEGG_HISTIDINE_METABOLISM	0.285634	4.81852e-22
KEGG_PYRUVATE_METABOLISM	0.259949	8.98936e-22
KEGG_GLYOXYLATE_AND_DICARBOXYLATE_METABOLISM	0.309272	3.8676e-21
HALLMARK_PEROXISOME	0.21478	7.74043e-21
KEGG_LYSINE_DEGRADATION	0.289726	1.90929e-20
KEGG_ABC_TRANSPORTERS	0.170493	2.19547e-19
KEGG_RIBOSOME	-0.438268	3.71766e-18
HALLMARK_ADIPOGENESIS	0.212179	7.10612e-18
KEGG_ASCORBATE_AND_ALDARATE_METABOLISM	0.332227	1.37933e-17
KEGG_GLYCOLYSIS_GLUCONEOGENESIS	0.20615	1.97436e-17
KEGG_PENTOSE_AND_GLUCURONATE_INTERCONVERSIONS	0.293248	2.19255e-16
KEGG_PHENYLALANINE_METABOLISM	0.251124	1.81906e-13
KEGG_ADIPOCYTOKINE_SIGNALING_PATHWAY	0.139049	2.60802e-13
KEGG_PORPHYRIN_AND_CHLOROPHYLL_METABOLISM	0.232637	3.07717e-13
KEGG_ARGININE_AND_PROLINE_METABOLISM	0.2132	3.27858e-13
KEGG_CITRATE_CYCLE_TCA_CYCLE	0.304431	1.0422e-12
KEGG_NICOTINATE_AND_NICOTINAMIDE_METABOLISM	0.188302	4.32427e-12
KEGG_BIOSYNTHESIS_OF_UNSATURATED_FATTY_ACIDS	0.242327	4.78642e-12
KEGG_CYSTEINE_AND_METHIONINE_METABOLISM	0.165741	2.90132e-11
KEGG_ALANINE_ASPARTATE_AND_GLUTAMATE_METABOLISM	0.203389	4.619e-11
KEGG_NITROGEN_METABOLISM	0.184783	8.72166e-11
HALLMARK_MYC_TARGETS_V1	-0.228499	1.1082e-10
KEGG_RIBOFLAVIN_METABOLISM	-0.22659	5.15799e-10
HALLMARK_MYC_TARGETS_V2	-0.271563	5.88817e-10
KEGG_COMPLEMENT_AND_COAGULATION_CASCADES	0.179657	1.55625e-09
KEGG_PATHOGENIC_ESCHERICHIA_COLI_INFECTION	-0.142231	5.00737e-09
KEGG_SPLICEOSOME	-0.175642	5.47285e-09
KEGG_LINOLEIC_ACID_METABOLISM	0.169571	1.51045e-08
KEGG_BLADDER_CANCER	-0.15944	2.41173e-08
KEGG_RENIN_ANGIOTENSIN_SYSTEM	0.175129	4.01459e-08
HALLMARK_HEME_METABOLISM	0.123178	9.28289e-08
KEGG_CARDIAC_MUSCLE_CONTRACTION	-0.14986	9.42578e-08
KEGG_GLYCEROPHOSPHOLIPID_METABOLISM	-0.0870875	1.2685e-07
KEGG_RNA_POLYMERASE	-0.178407	7.28119e-07
KEGG_PROTEIN_EXPORT	-0.198498	1.63407e-06
KEGG_DNA_REPLICATION	-0.26122	1.71092e-06
KEGG_CIRCADIAN_RHYTHM_MAMMAL	0.223613	1.79848e-06
HALLMARK_DNA_REPAIR	-0.152833	1.80212e-06
HALLMARK_G2M_CHECKPOINT	-0.233281	1.92633e-06
HALLMARK_E2F_TARGETS	-0.222193	2.86877e-06
KEGG_VIBRIO_CHOLERAE_INFECTION	-0.107106	5.41044e-06
KEGG_GLYCOSPHINGOLIPID_BIOSYNTHESIS_LACTO_AND_NEOLACTO_SERIES	-0.112211	8.64872e-06
KEGG_ONE_CARBON_POOL_BY_FOLATE	0.11455	1.00057e-05
HALLMARK_COAGULATION	0.112974	2.53873e-05
KEGG_GLYCOSAMINOGLYCAN_BIOSYNTHESIS_HEPARAN_SULFATE	-0.121284	3.30982e-05
KEGG_PURINE_METABOLISM	-0.086596	3.56359e-05
KEGG_ETHER_LIPID_METABOLISM	-0.0998522	3.66211e-05
KEGG_PROXIMAL_TUBULE_BICARBONATE_RECLAMATION	0.114212	4.03142e-05
KEGG_HOMOLOGOUS_RECOMBINATION	-0.187371	4.46384e-05
KEGG_CELL_CYCLE	-0.162212	5.35137e-05
KEGG_PYRIMIDINE_METABOLISM	-0.115643	6.26543e-05
HALLMARK_UV_RESPONSE_UP	-0.0709739	0.000117631
HALLMARK_ANDROGEN_RESPONSE	0.113978	0.000152485
KEGG_SELENOAMINO_ACID_METABOLISM	0.120562	0.000229201
HALLMARK_UV_RESPONSE_DN	0.130648	0.00028011
KEGG_FC_GAMMA_R_MEDIATED_PHAGOCYTOSIS	-0.127254	0.000407394
KEGG_GALACTOSE_METABOLISM	0.0901979	0.000502857
HALLMARK_UNFOLDED_PROTEIN_RESPONSE	-0.121099	0.00064235
KEGG_PRIMARY_IMMUNODEFICIENCY	-0.115393	0.000685871
KEGG_ALDOSTERONE_REGULATED_SODIUM_REABSORPTION	0.0888176	0.000719105
KEGG_HUNTINGTONS_DISEASE	-0.0791103	0.00125325
KEGG_GLYCEROLIPID_METABOLISM	0.0566	0.00207156
KEGG_THYROID_CANCER	-0.0875715	0.0024008
HALLMARK_NOTCH_SIGNALING	-0.099423	0.00266425
KEGG_NON_HOMOLOGOUS_END_JOINING	-0.142881	0.00358466
KEGG_PENTOSE_PHOSPHATE_PATHWAY	0.0863339	0.00482644
KEGG_OOCYTE_MEIOSIS	-0.0846355	0.00482644
HALLMARK_MTORC1_SIGNALING	-0.0891008	0.00496645
KEGG_NOTCH_SIGNALING_PATHWAY	-0.0820047	0.00496645
KEGG_BASE_EXCISION_REPAIR	-0.126154	0.00535884
KEGG_GLYCOSPHINGOLIPID_BIOSYNTHESIS_GLOBO_SERIES	-0.104482	0.00722984
KEGG_RNA_DEGRADATION	-0.069541	0.00766279
KEGG_GLYCOSAMINOGLYCAN_BIOSYNTHESIS_CHONDROITIN_SULFATE	-0.101272	0.00806812
KEGG_REGULATION_OF_AUTOPHAGY	0.0723683	0.00806812
HALLMARK_APICAL_SURFACE	-0.0808127	0.00814563
KEGG_VEGF_SIGNALING_PATHWAY	-0.0684224	0.0103349
KEGG_BASAL_CELL_CARCINOMA	-0.0721269	0.0162438
KEGG_NUCLEOTIDE_EXCISION_REPAIR	-0.0872165	0.0163026
KEGG_GNRH_SIGNALING_PATHWAY	-0.0684304	0.0164284
KEGG_OLFACTORY_TRANSDUCTION	0.0271269	0.01914
HALLMARK_PANCREAS_BETA_CELLS	0.0502953	0.0215096
KEGG_MISMATCH_REPAIR	-0.122239	0.0215601
KEGG_SNARE_INTERACTIONS_IN_VESICULAR_TRANSPORT	-0.0827038	0.0221815
KEGG_INSULIN_SIGNALING_PATHWAY	0.0542439	0.0281368
HALLMARK_PI3K_AKT_MTOR_SIGNALING	-0.0658436	0.0294207
KEGG_ARACHIDONIC_ACID_METABOLISM	0.0560869	0.0310594
KEGG_CYTOSOLIC_DNA_SENSING_PATHWAY	-0.0610931	0.0319253
KEGG_GLYCOSAMINOGLYCAN_BIOSYNTHESIS_KERATAN_SULFATE	-0.0790422	0.0381361
KEGG_AXON_GUIDANCE	-0.0674739	0.0389822
HALLMARK_ALLOGRAFT_REJECTION	-0.0453374	0.0454562
HALLMARK_WNT_BETA_CATENIN_SIGNALING	-0.059715	0.047205
KEGG_PROTEASOME	-0.065146	0.0507923
HALLMARK_MITOTIC_SPINDLE	-0.0837193	0.0520653
KEGG_NOD_LIKE_RECEPTOR_SIGNALING_PATHWAY	-0.0605665	0.05707
KEGG_HYPERTROPHIC_CARDIOMYOPATHY_HCM	-0.0588351	0.0610961
HALLMARK_GLYCOLYSIS	-0.0408654	0.0789583
KEGG_ENDOMETRIAL_CANCER	0.0649172	0.0836951
HALLMARK_INTERFERON_ALPHA_RESPONSE	0.054055	0.0868008
HALLMARK_APICAL_JUNCTION	-0.0459424	0.0883791
HALLMARK_SPERMATOGENESIS	-0.0370643	0.0962182
KEGG_CYTOKINE_CYTOKINE_RECEPTOR_INTERACTION	-0.0553532	0.0962182
KEGG_WNT_SIGNALING_PATHWAY	-0.0471553	0.104185
KEGG_PROGESTERONE_MEDIATED_OOCYTE_MATURATION	-0.052928	0.112671
KEGG_GLUTATHIONE_METABOLISM	0.0474842	0.117907
KEGG_ENDOCYTOSIS	-0.0344888	0.117907
KEGG_T_CELL_RECEPTOR_SIGNALING_PATHWAY	-0.0560863	0.121102
KEGG_GLYCOSAMINOGLYCAN_DEGRADATION	0.0620068	0.127585
HALLMARK_IL2_STAT5_SIGNALING	-0.0488971	0.128466
KEGG_VASOPRESSIN_REGULATED_WATER_REABSORPTION	-0.0546494	0.128466
HALLMARK_ESTROGEN_RESPONSE_EARLY	0.0389485	0.13119
KEGG_EPITHELIAL_CELL_SIGNALING_IN_HELICOBACTER_PYLORI_INFECTION	-0.0437682	0.145056
KEGG_N_GLYCAN_BIOSYNTHESIS	-0.0616865	0.150149
HALLMARK_ESTROGEN_RESPONSE_LATE	-0.0295009	0.151434
KEGG_HEDGEHOG_SIGNALING_PATHWAY	-0.0458772	0.15159
KEGG_REGULATION_OF_ACTIN_CYTOSKELETON	-0.0465332	0.15159
KEGG_ALZHEIMERS_DISEASE	-0.0350644	0.156492
KEGG_RENAL_CELL_CARCINOMA	-0.0596267	0.164013
KEGG_DILATED_CARDIOMYOPATHY	-0.0453963	0.17801
HALLMARK_CHOLESTEROL_HOMEOSTASIS	-0.0443347	0.180172
KEGG_CHEMOKINE_SIGNALING_PATHWAY	-0.0458642	0.188403
KEGG_MELANOMA	0.0357923	0.197957
KEGG_PHOSPHATIDYLINOSITOL_SIGNALING_SYSTEM	-0.0494303	0.197957
KEGG_TYPE_II_DIABETES_MELLITUS	0.031628	0.203032
HALLMARK_INTERFERON_GAMMA_RESPONSE	0.0377336	0.208879
KEGG_LONG_TERM_DEPRESSION	-0.0329909	0.208879
KEGG_MAPK_SIGNALING_PATHWAY	-0.0307784	0.215236
KEGG_TIGHT_JUNCTION	-0.0305224	0.218495
HALLMARK_REACTIVE_OXYGEN_SPECIES_PATHWAY	-0.0383472	0.218847
KEGG_APOPTOSIS	0.0394147	0.222864
KEGG_AUTOIMMUNE_THYROID_DISEASE	0.00842848	0.252658
KEGG_LYSOSOME	-0.0364992	0.252658
KEGG_PANTOTHENATE_AND_COA_BIOSYNTHESIS	0.0385644	0.254408
KEGG_GLYCOSYLPHOSPHATIDYLINOSITOL_GPI_ANCHOR_BIOSYNTHESIS	-0.0473804	0.278593
KEGG_ADHERENS_JUNCTION	0.0390261	0.286181
KEGG_AMYOTROPHIC_LATERAL_SCLEROSIS_ALS	-0.0215509	0.29323
KEGG_DORSO_VENTRAL_AXIS_FORMATION	0.031878	0.355323
KEGG_LONG_TERM_POTENTIATION	-0.0283448	0.386226
KEGG_PROSTATE_CANCER	0.0322466	0.387077
KEGG_INOSITOL_PHOSPHATE_METABOLISM	-0.0373182	0.39217
KEGG_MELANOGENESIS	-0.0263038	0.39217
KEGG_TERPENOID_BACKBONE_BIOSYNTHESIS	-0.0472292	0.396554
KEGG_PATHWAYS_IN_CANCER	-0.0289453	0.399317
KEGG_OXIDATIVE_PHOSPHORYLATION	-0.0299612	0.399317
HALLMARK_HEDGEHOG_SIGNALING	0.0361227	0.399317
KEGG_ANTIGEN_PROCESSING_AND_PRESENTATION	0.00316783	0.399317
KEGG_OTHER_GLYCAN_DEGRADATION	0.0252724	0.399317
KEGG_HEMATOPOIETIC_CELL_LINEAGE	-0.0312383	0.402469
KEGG_STEROID_BIOSYNTHESIS	-0.0423341	0.402469
KEGG_NATURAL_KILLER_CELL_MEDIATED_CYTOTOXICITY	0.00443573	0.412921
KEGG_O_GLYCAN_BIOSYNTHESIS	0.0284249	0.414791
KEGG_FC_EPSILON_RI_SIGNALING_PATHWAY	-0.0238106	0.423717
KEGG_CALCIUM_SIGNALING_PATHWAY	0.0241931	0.426749
KEGG_SYSTEMIC_LUPUS_ERYTHEMATOSUS	0.00924627	0.43296
KEGG_PRION_DISEASES	0.0257164	0.4363
KEGG_B_CELL_RECEPTOR_SIGNALING_PATHWAY	-0.0306783	0.4363
HALLMARK_ANGIOGENESIS	-0.038015	0.4363
KEGG_UBIQUITIN_MEDIATED_PROTEOLYSIS	-0.0359472	0.4363
HALLMARK_P53_PATHWAY	-0.0202152	0.4363
KEGG_FRUCTOSE_AND_MANNOSE_METABOLISM	0.023917	0.437026
HALLMARK_MYOGENESIS	-0.0239663	0.437026
HALLMARK_COMPLEMENT	0.021934	0.477967
HALLMARK_OXIDATIVE_PHOSPHORYLATION	0.0276425	0.479082
KEGG_NEUROTROPHIN_SIGNALING_PATHWAY	-0.0266473	0.489814
HALLMARK_PROTEIN_SECRETION	0.0316384	0.513667
KEGG_SMALL_CELL_LUNG_CANCER	0.024194	0.514277
HALLMARK_EPITHELIAL_MESENCHYMAL_TRANSITION	-0.033791	0.522056
KEGG_ECM_RECEPTOR_INTERACTION	0.02053	0.546923
KEGG_MATURITY_ONSET_DIABETES_OF_THE_YOUNG	-0.0192375	0.55181
KEGG_PANCREATIC_CANCER	-0.0249843	0.553225
KEGG_SULFUR_METABOLISM	0.0204976	0.563036
KEGG_VASCULAR_SMOOTH_MUSCLE_CONTRACTION	0.0190821	0.568239
KEGG_AMINOACYL_TRNA_BIOSYNTHESIS	-0.0224033	0.59051
KEGG_JAK_STAT_SIGNALING_PATHWAY	0.0172552	0.645159
KEGG_CHRONIC_MYELOID_LEUKEMIA	-0.020318	0.646357
HALLMARK_HYPOXIA	0.0136259	0.651147
HALLMARK_TNFA_SIGNALING_VIA_NFKB	0.0187575	0.661552
KEGG_GLYCOSPHINGOLIPID_BIOSYNTHESIS_GANGLIO_SERIES	-0.0155337	0.663842
HALLMARK_TGF_BETA_SIGNALING	-0.0192738	0.670284
HALLMARK_APOPTOSIS	-0.0129589	0.670284
KEGG_LEUKOCYTE_TRANSENDOTHELIAL_MIGRATION	-0.0158907	0.670284
KEGG_ARRHYTHMOGENIC_RIGHT_VENTRICULAR_CARDIOMYOPATHY_ARVC	-0.0167759	0.672164
KEGG_P53_SIGNALING_PATHWAY	0.0138534	0.673181
KEGG_VIRAL_MYOCARDITIS	0.00409267	0.673181
KEGG_NON_SMALL_CELL_LUNG_CANCER	0.013715	0.673181
KEGG_ALLOGRAFT_REJECTION	0.00294101	0.673181
KEGG_LEISHMANIA_INFECTION	-0.00645954	0.673181
KEGG_INTESTINAL_IMMUNE_NETWORK_FOR_IGA_PRODUCTION	-0.00555797	0.673533
KEGG_SPHINGOLIPID_METABOLISM	0.0106099	0.673533
HALLMARK_INFLAMMATORY_RESPONSE	-0.0142647	0.754785
KEGG_FOCAL_ADHESION	0.0118629	0.757822
KEGG_GAP_JUNCTION	-0.00877895	0.767195
KEGG_PARKINSONS_DISEASE	0.0106529	0.778427
KEGG_TGF_BETA_SIGNALING_PATHWAY	-0.0094743	0.785105
KEGG_CELL_ADHESION_MOLECULES_CAMS	0.00432321	0.802142
HALLMARK_KRAS_SIGNALING_UP	0.00857046	0.815221
KEGG_TYPE_I_DIABETES_MELLITUS	0.00164884	0.815221
KEGG_COLORECTAL_CANCER	0.00977042	0.825275
KEGG_ACUTE_MYELOID_LEUKEMIA	-0.00712166	0.87722
KEGG_ERBB_SIGNALING_PATHWAY	-0.00637751	0.877739
KEGG_NEUROACTIVE_LIGAND_RECEPTOR_INTERACTION	0.00424727	0.883523
KEGG_AMINO_SUGAR_AND_NUCLEOTIDE_SUGAR_METABOLISM	-0.00538936	0.891028
KEGG_GRAFT_VERSUS_HOST_DISEASE	0.000479315	0.901261
KEGG_TOLL_LIKE_RECEPTOR_SIGNALING_PATHWAY	0.00408597	0.913876
KEGG_GLIOMA	0.00332865	0.93016
HALLMARK_IL6_JAK_STAT3_SIGNALING	0.00221947	0.966911
HALLMARK_KRAS_SIGNALING_DN	-0.0010286	0.966911
KEGG_ASTHMA	0.000422446	0.966911
KEGG_MTOR_SIGNALING_PATHWAY	-0.00169596	0.970105
KEGG_RIG_I_LIKE_RECEPTOR_SIGNALING_PATHWAY	-0.00122888	0.970105
KEGG_TASTE_TRANSDUCTION	-0.000371813	0.973748
KEGG_BASAL_TRANSCRIPTION_FACTORS	-0.000982331	0.973748
KEGG_ALPHA_LINOLENIC_ACID_METABOLISM	0.000331271	0.989114

## Sheet: Table S2-3
Supplementary Table S2: Results of differential pathways analysis conducted by limma (C1 vs. C3)
Gene sets	logFC	adj.P.Val
KEGG_PPAR_SIGNALING_PATHWAY	-0.277842	2.40098e-14
KEGG_GLYCINE_SERINE_AND_THREONINE_METABOLISM	-0.393	3.28017e-14
BAM	-0.297325	6.83352e-13
KEGG_STEROID_BIOSYNTHESIS	-0.465873	6.83352e-13
KEGG_LINOLEIC_ACID_METABOLISM	-0.303253	2.04336e-11
KEGG_RETINOL_METABOLISM	-0.297119	2.87132e-11
KEGG_MATURITY_ONSET_DIABETES_OF_THE_YOUNG	-0.265633	7.06005e-11
KEGG_ADHERENS_JUNCTION	0.308165	1.1507e-10
KEGG_DRUG_METABOLISM_CYTOCHROME_P450	-0.273708	1.74283e-10
HALLMARK_HEDGEHOG_SIGNALING	0.344294	1.74283e-10
KEGG_VASOPRESSIN_REGULATED_WATER_REABSORPTION	0.307897	1.81523e-10
KEGG_SMALL_CELL_LUNG_CANCER	0.298457	1.81523e-10
KEGG_PANCREATIC_CANCER	0.332865	2.74438e-10
HALLMARK_CHOLESTEROL_HOMEOSTASIS	-0.275601	3.07884e-10
KEGG_REGULATION_OF_AUTOPHAGY	0.240128	6.65525e-10
KEGG_MTOR_SIGNALING_PATHWAY	0.291833	9.81479e-10
KEGG_ERBB_SIGNALING_PATHWAY	0.285376	9.81479e-10
KEGG_PEROXISOME	-0.23952	1.5485e-09
HALLMARK_XENOBIOTIC_METABOLISM	-0.214169	1.6049e-09
KEGG_COLORECTAL_CANCER	0.319635	1.94347e-09
KEGG_STEROID_HORMONE_BIOSYNTHESIS	-0.2165	1.94347e-09
KEGG_TERPENOID_BACKBONE_BIOSYNTHESIS	-0.40946	1.94347e-09
KEGG_DORSO_VENTRAL_AXIS_FORMATION	0.254191	2.46905e-09
KEGG_ENDOCYTOSIS	0.174048	2.52346e-09
KEGG_CHRONIC_MYELOID_LEUKEMIA	0.309403	3.10608e-09
KEGG_METABOLISM_OF_XENOBIOTICS_BY_CYTOCHROME_P450	-0.274238	3.88682e-09
KEGG_DRUG_METABOLISM_OTHER_ENZYMES	-0.236226	3.90806e-09
KEGG_WNT_SIGNALING_PATHWAY	0.22519	4.731e-09
KEGG_NOTCH_SIGNALING_PATHWAY	0.239576	5.98894e-09
KEGG_NEUROTROPHIN_SIGNALING_PATHWAY	0.280136	6.18115e-09
KEGG_EPITHELIAL_CELL_SIGNALING_IN_HELICOBACTER_PYLORI_INFECTION	0.226785	8.20584e-09
KEGG_FATTY_ACID_METABOLISM	-0.336454	8.30863e-09
HALLMARK_PROTEIN_SECRETION	0.34348	8.8179e-09
KEGG_HISTIDINE_METABOLISM	-0.242083	9.50883e-09
KEGG_FOCAL_ADHESION	0.262072	1.03375e-08
HALLMARK_TGF_BETA_SIGNALING	0.306169	1.03375e-08
KEGG_APOPTOSIS	0.240063	1.03375e-08
KEGG_O_GLYCAN_BIOSYNTHESIS	0.244232	1.4421e-08
KEGG_GAP_JUNCTION	0.199336	1.51895e-08
KEGG_PATHWAYS_IN_CANCER	0.233728	1.9392e-08
KEGG_BASAL_TRANSCRIPTION_FACTORS	0.224999	1.9392e-08
KEGG_ARACHIDONIC_ACID_METABOLISM	-0.199079	1.9392e-08
KEGG_BIOSYNTHESIS_OF_UNSATURATED_FATTY_ACIDS	-0.284834	2.04981e-08
KEGG_NON_SMALL_CELL_LUNG_CANCER	0.224098	2.11795e-08
KEGG_TGF_BETA_SIGNALING_PATHWAY	0.227143	3.49018e-08
HALLMARK_UV_RESPONSE_DN	0.282008	3.89538e-08
KEGG_RENAL_CELL_CARCINOMA	0.296404	1.04986e-07
KEGG_FC_GAMMA_R_MEDIATED_PHAGOCYTOSIS	0.272528	1.0615e-07
KEGG_ENDOMETRIAL_CANCER	0.262874	1.08354e-07
HALLMARK_WNT_BETA_CATENIN_SIGNALING	0.214848	1.12863e-07
KEGG_RIG_I_LIKE_RECEPTOR_SIGNALING_PATHWAY	0.189826	1.14594e-07
KEGG_MELANOGENESIS	0.194877	1.3348e-07
KEGG_BUTANOATE_METABOLISM	-0.266251	1.3348e-07
KEGG_PROSTATE_CANCER	0.234998	1.3934e-07
KEGG_GLIOMA	0.20933	1.9558e-07
KEGG_LEISHMANIA_INFECTION	0.0984728	2.01587e-07
KEGG_MAPK_SIGNALING_PATHWAY	0.16549	2.02395e-07
KEGG_GLYCOSAMINOGLYCAN_BIOSYNTHESIS_CHONDROITIN_SULFATE	0.273249	2.40413e-07
KEGG_REGULATION_OF_ACTIN_CYTOSKELETON	0.217077	2.52941e-07
HALLMARK_NOTCH_SIGNALING	0.237098	2.88689e-07
KEGG_ARGININE_AND_PROLINE_METABOLISM	-0.212445	4.4664e-07
KEGG_COMPLEMENT_AND_COAGULATION_CASCADES	-0.216194	4.68591e-07
HALLMARK_PI3K_AKT_MTOR_SIGNALING	0.202112	8.00257e-07
KEGG_UBIQUITIN_MEDIATED_PROTEOLYSIS	0.281614	9.53254e-07
KEGG_PANTOTHENATE_AND_COA_BIOSYNTHESIS	-0.209121	1.17766e-06
KEGG_ALANINE_ASPARTATE_AND_GLUTAMATE_METABOLISM	-0.215397	1.29983e-06
KEGG_TYROSINE_METABOLISM	-0.183769	1.36109e-06
HALLMARK_MITOTIC_SPINDLE	0.274572	1.89827e-06
KEGG_AXON_GUIDANCE	0.208925	2.04034e-06
KEGG_MELANOMA	0.168012	2.29906e-06
KEGG_TRYPTOPHAN_METABOLISM	-0.217996	2.37137e-06
KEGG_ARRHYTHMOGENIC_RIGHT_VENTRICULAR_CARDIOMYOPATHY_ARVC	0.221439	2.47873e-06
KEGG_OLFACTORY_TRANSDUCTION	-0.0736307	2.97747e-06
HALLMARK_COAGULATION	-0.175241	4.66121e-06
KEGG_HEDGEHOG_SIGNALING_PATHWAY	0.188696	5.078e-06
KEGG_GNRH_SIGNALING_PATHWAY	0.177065	5.42778e-06
KEGG_PHOSPHATIDYLINOSITOL_SIGNALING_SYSTEM	0.222532	5.74473e-06
HALLMARK_FATTY_ACID_METABOLISM	-0.172682	6.30388e-06
KEGG_LONG_TERM_POTENTIATION	0.175182	6.36107e-06
KEGG_PROGESTERONE_MEDIATED_OOCYTE_MATURATION	0.194696	6.36107e-06
KEGG_DILATED_CARDIOMYOPATHY	0.194558	6.36107e-06
KEGG_ALPHA_LINOLENIC_ACID_METABOLISM	-0.167045	7.84972e-06
KEGG_BETA_ALANINE_METABOLISM	-0.232111	8.32201e-06
KEGG_HYPERTROPHIC_CARDIOMYOPATHY_HCM	0.185048	8.68701e-06
KEGG_NOD_LIKE_RECEPTOR_SIGNALING_PATHWAY	0.186509	1.00355e-05
KEGG_ACUTE_MYELOID_LEUKEMIA	0.217212	1.02663e-05
KEGG_GLYCOSAMINOGLYCAN_BIOSYNTHESIS_KERATAN_SULFATE	0.222663	1.27658e-05
KEGG_INOSITOL_PHOSPHATE_METABOLISM	0.226258	1.30631e-05
KEGG_RNA_DEGRADATION	0.154024	1.71352e-05
KEGG_BASAL_CELL_CARCINOMA	0.174091	1.90293e-05
KEGG_CIRCADIAN_RHYTHM_MAMMAL	0.283957	2.14569e-05
HALLMARK_TNFA_SIGNALING_VIA_NFKB	0.2087	2.23665e-05
KEGG_SNARE_INTERACTIONS_IN_VESICULAR_TRANSPORT	0.205028	2.82351e-05
KEGG_B_CELL_RECEPTOR_SIGNALING_PATHWAY	0.200363	3.68174e-05
KEGG_T_CELL_RECEPTOR_SIGNALING_PATHWAY	0.192483	3.7194e-05
KEGG_VIBRIO_CHOLERAE_INFECTION	0.13747	4.19867e-05
KEGG_SPHINGOLIPID_METABOLISM	0.127767	4.63565e-05
HALLMARK_P53_PATHWAY	0.130303	4.89378e-05
KEGG_ECM_RECEPTOR_INTERACTION	0.165624	4.89378e-05
KEGG_INSULIN_SIGNALING_PATHWAY	0.134715	4.89378e-05
KEGG_ASCORBATE_AND_ALDARATE_METABOLISM	-0.219519	6.69303e-05
KEGG_P53_SIGNALING_PATHWAY	0.156622	7.27954e-05
KEGG_JAK_STAT_SIGNALING_PATHWAY	0.168523	8.15896e-05
HALLMARK_HEME_METABOLISM	0.129381	8.48705e-05
HALLMARK_APICAL_JUNCTION	0.137731	8.48705e-05
KEGG_VEGF_SIGNALING_PATHWAY	0.143182	8.50984e-05
KEGG_PATHOGENIC_ESCHERICHIA_COLI_INFECTION	0.136396	8.50984e-05
KEGG_BLADDER_CANCER	0.160105	8.54072e-05
KEGG_PENTOSE_AND_GLUCURONATE_INTERCONVERSIONS	-0.192242	0.000145074
KEGG_TOLL_LIKE_RECEPTOR_SIGNALING_PATHWAY	0.155136	0.000146199
KEGG_SULFUR_METABOLISM	-0.161404	0.000146504
KEGG_FC_EPSILON_RI_SIGNALING_PATHWAY	0.13536	0.000170688
HALLMARK_PEROXISOME	-0.119671	0.000193988
KEGG_GLUTATHIONE_METABOLISM	-0.144995	0.000200805
KEGG_NITROGEN_METABOLISM	-0.149765	0.000226539
KEGG_LYSOSOME	0.146708	0.00025142
KEGG_ONE_CARBON_POOL_BY_FOLATE	-0.133599	0.000280665
KEGG_OOCYTE_MEIOSIS	0.149209	0.000291072
KEGG_CELL_CYCLE	0.204044	0.00032472
KEGG_SPLICEOSOME	0.154107	0.000331276
HALLMARK_EPITHELIAL_MESENCHYMAL_TRANSITION	0.22847	0.000336497
KEGG_PYRUVATE_METABOLISM	-0.132856	0.000439272
HALLMARK_HYPOXIA	0.119027	0.000580514
KEGG_LEUKOCYTE_TRANSENDOTHELIAL_MIGRATION	0.149138	0.000624906
KEGG_VIRAL_MYOCARDITIS	0.0399479	0.000624906
KEGG_ALDOSTERONE_REGULATED_SODIUM_REABSORPTION	0.125452	0.000624906
KEGG_PHENYLALANINE_METABOLISM	-0.165033	0.00063767
KEGG_LONG_TERM_DEPRESSION	0.112309	0.000730229
KEGG_NUCLEOTIDE_EXCISION_REPAIR	0.164803	0.00077057
KEGG_CALCIUM_SIGNALING_PATHWAY	0.123105	0.000822332
KEGG_NON_HOMOLOGOUS_END_JOINING	0.223782	0.000892468
HALLMARK_PANCREAS_BETA_CELLS	-0.0962432	0.00106127
KEGG_PROPANOATE_METABOLISM	-0.177155	0.0010711
HALLMARK_APICAL_SURFACE	0.134528	0.00127737
KEGG_TIGHT_JUNCTION	0.100723	0.00132179
HALLMARK_UNFOLDED_PROTEIN_RESPONSE	0.156492	0.00156461
KEGG_PURINE_METABOLISM	0.0926767	0.00170352
HALLMARK_ANGIOGENESIS	0.18758	0.00170352
KEGG_GLYCOSPHINGOLIPID_BIOSYNTHESIS_GANGLIO_SERIES	0.128496	0.00171068
HALLMARK_IL6_JAK_STAT3_SIGNALING	0.141982	0.00177241
KEGG_CYTOSOLIC_DNA_SENSING_PATHWAY	0.117971	0.00189953
HALLMARK_ANDROGEN_RESPONSE	0.130578	0.00197733
KEGG_TYPE_I_DIABETES_MELLITUS	0.0247593	0.00248783
KEGG_RENIN_ANGIOTENSIN_SYSTEM	-0.13308	0.0033797
HALLMARK_APOPTOSIS	0.103306	0.00345719
KEGG_THYROID_CANCER	0.116128	0.00348329
HALLMARK_G2M_CHECKPOINT	0.199947	0.0040289
KEGG_VALINE_LEUCINE_AND_ISOLEUCINE_DEGRADATION	-0.167291	0.00415474
KEGG_TYPE_II_DIABETES_MELLITUS	0.0893735	0.00439022
HALLMARK_INFLAMMATORY_RESPONSE	0.149741	0.00444616
KEGG_CHEMOKINE_SIGNALING_PATHWAY	0.124372	0.00477053
KEGG_PORPHYRIN_AND_CHLOROPHYLL_METABOLISM	-0.127048	0.00487976
HALLMARK_DNA_REPAIR	0.12471	0.00596511
KEGG_TASTE_TRANSDUCTION	0.0367515	0.00612642
HALLMARK_ESTROGEN_RESPONSE_EARLY	0.088817	0.00726896
KEGG_GLYCOSAMINOGLYCAN_DEGRADATION	0.137078	0.00842164
KEGG_MISMATCH_REPAIR	0.186846	0.00897827
KEGG_RIBOSOME	-0.182768	0.00990019
HALLMARK_MYC_TARGETS_V1	0.129739	0.00999397
KEGG_HOMOLOGOUS_RECOMBINATION	0.166428	0.0100805
KEGG_NATURAL_KILLER_CELL_MEDIATED_CYTOTOXICITY	0.0165835	0.0110011
KEGG_ASTHMA	0.0236851	0.0127512
KEGG_VASCULAR_SMOOTH_MUSCLE_CONTRACTION	0.0990557	0.0133151
KEGG_PROXIMAL_TUBULE_BICARBONATE_RECLAMATION	-0.0962153	0.0141164
KEGG_GLYCOSYLPHOSPHATIDYLINOSITOL_GPI_ANCHOR_BIOSYNTHESIS	0.132494	0.0144772
KEGG_CELL_ADHESION_MOLECULES_CAMS	0.0478233	0.0157655
KEGG_GLYCOSAMINOGLYCAN_BIOSYNTHESIS_HEPARAN_SULFATE	0.099157	0.0157655
HALLMARK_IL2_STAT5_SIGNALING	0.0927611	0.024878
KEGG_STARCH_AND_SUCROSE_METABOLISM	-0.0773264	0.0251222
HALLMARK_SPERMATOGENESIS	0.064113	0.0260416
KEGG_RNA_POLYMERASE	0.110971	0.0301623
KEGG_OTHER_GLYCAN_DEGRADATION	0.0764917	0.0343831
HALLMARK_REACTIVE_OXYGEN_SPECIES_PATHWAY	-0.083775	0.0343831
KEGG_GLYCOLYSIS_GLUCONEOGENESIS	-0.0723985	0.0343831
KEGG_AUTOIMMUNE_THYROID_DISEASE	0.0190465	0.0392687
KEGG_BASE_EXCISION_REPAIR	0.125464	0.0440189
HALLMARK_INTERFERON_GAMMA_RESPONSE	0.0766001	0.0440624
HALLMARK_MYOGENESIS	0.0768577	0.0445245
KEGG_AMYOTROPHIC_LATERAL_SCLEROSIS_ALS	0.0497688	0.0504364
HALLMARK_KRAS_SIGNALING_DN	-0.0419646	0.0531835
KEGG_GLYCOSPHINGOLIPID_BIOSYNTHESIS_GLOBO_SERIES	0.101993	0.0550128
HALLMARK_E2F_TARGETS	0.128591	0.0564456
HALLMARK_KRAS_SIGNALING_UP	0.0794281	0.0615083
HALLMARK_ALLOGRAFT_REJECTION	0.056073	0.0615083
KEGG_INTESTINAL_IMMUNE_NETWORK_FOR_IGA_PRODUCTION	0.0293491	0.0709855
KEGG_ALLOGRAFT_REJECTION	0.0150679	0.0764751
HALLMARK_INTERFERON_ALPHA_RESPONSE	0.0716614	0.0799404
KEGG_CYSTEINE_AND_METHIONINE_METABOLISM	-0.061683	0.0819506
KEGG_RIBOFLAVIN_METABOLISM	-0.0843229	0.106291
KEGG_GLYCEROLIPID_METABOLISM	-0.0400913	0.116657
KEGG_N_GLYCAN_BIOSYNTHESIS	0.0819821	0.137342
KEGG_PYRIMIDINE_METABOLISM	0.0609656	0.138482
KEGG_AMINOACYL_TRNA_BIOSYNTHESIS	0.072616	0.144055
KEGG_ABC_TRANSPORTERS	-0.0390531	0.144055
KEGG_GLYOXYLATE_AND_DICARBOXYLATE_METABOLISM	-0.0653555	0.156181
KEGG_ADIPOCYTOKINE_SIGNALING_PATHWAY	0.0366693	0.178429
KEGG_HUNTINGTONS_DISEASE	0.0449138	0.192576
KEGG_OXIDATIVE_PHOSPHORYLATION	-0.0551144	0.199945
HALLMARK_MTORC1_SIGNALING	0.0546103	0.214978
HALLMARK_MYC_TARGETS_V2	0.0688618	0.282749
KEGG_SELENOAMINO_ACID_METABOLISM	0.0504677	0.282864
HALLMARK_OXIDATIVE_PHOSPHORYLATION	-0.0506844	0.297488
KEGG_PROTEIN_EXPORT	-0.0624409	0.297488
KEGG_DNA_REPLICATION	0.0785478	0.321828
KEGG_FRUCTOSE_AND_MANNOSE_METABOLISM	0.0366655	0.348462
KEGG_PENTOSE_PHOSPHATE_PATHWAY	0.0402539	0.348947
KEGG_CYTOKINE_CYTOKINE_RECEPTOR_INTERACTION	0.0404145	0.358768
HALLMARK_ADIPOGENESIS	-0.0314734	0.375313
HALLMARK_GLYCOLYSIS	0.0270492	0.380753
KEGG_HEMATOPOIETIC_CELL_LINEAGE	0.0390629	0.395423
KEGG_LYSINE_DEGRADATION	-0.037431	0.400983
KEGG_NICOTINATE_AND_NICOTINAMIDE_METABOLISM	0.0325471	0.407451
KEGG_GALACTOSE_METABOLISM	0.0298912	0.414697
KEGG_NEUROACTIVE_LIGAND_RECEPTOR_INTERACTION	0.0260985	0.414697
HALLMARK_COMPLEMENT	0.0306755	0.416613
KEGG_PRION_DISEASES	0.0328955	0.416613
KEGG_ALZHEIMERS_DISEASE	0.0242772	0.445435
KEGG_PARKINSONS_DISEASE	-0.0311235	0.481473
KEGG_PROTEASOME	0.028244	0.525873
KEGG_GRAFT_VERSUS_HOST_DISEASE	0.00263764	0.534716
KEGG_ANTIGEN_PROCESSING_AND_PRESENTATION	-0.00278225	0.537373
KEGG_AMINO_SUGAR_AND_NUCLEOTIDE_SUGAR_METABOLISM	0.0264999	0.537373
KEGG_CITRATE_CYCLE_TCA_CYCLE	0.0369593	0.538916
KEGG_PRIMARY_IMMUNODEFICIENCY	-0.026147	0.578069
KEGG_GLYCOSPHINGOLIPID_BIOSYNTHESIS_LACTO_AND_NEOLACTO_SERIES	-0.0147502	0.680426
KEGG_SYSTEMIC_LUPUS_ERYTHEMATOSUS	-0.00482692	0.736751
KEGG_CARDIAC_MUSCLE_CONTRACTION	-0.00882457	0.830016
KEGG_ETHER_LIPID_METABOLISM	0.00542146	0.878262
KEGG_GLYCEROPHOSPHOLIPID_METABOLISM	-0.00105455	0.970553
HALLMARK_UV_RESPONSE_UP	0.000225685	0.996985
HALLMARK_ESTROGEN_RESPONSE_LATE	-8.56654e-06	0.999725
