# Supplementary material for: Establishment and Validation of Novel Prognostic Subtypes in Hepatocellular Carcinoma Based on Bile Acid Metabolism Gene Signatures Using Bulk and Single-Cell RNA-Seq Data
Source: Int J Mol Sci. 2024 Jan 11;25(2):919. doi: 10.3390/ijms25020919 (PMC10815120; doi:10.3390/ijms25020919)
Supplement: Supplementary file 1 [file ijms-25-00919-s001.zip › Table S3.xlsx]

## Sheet: Table S3
Supplementary Table S3: Clinical characteristics and previous identified HCC classifications integrated into our subtypes
Clinical characteristics	C2 (n=190)		C1 (n=51)	C3 (n=127)	P value
Race					0.000413
Asian	67 (35)		18 (35)	72 (57)
White	103 (54)		31 (61)	49 (39)
Other	14 (7)		2 (4)	2 (2)
Gender					0.000738
Female	45 (24)		24 (47)	50 (39)
Male	145 (76)		27 (53)	77 (61)
Virus status					0.00488
HBV+HCV+	1 (0.5)		-	6 (5)
HBV+	48 (25)		7 (14)	42 (33)
HCV+	29 (14)		6 (12)	14 (11)
Virus-	105 (55)		34 (67)	58 (46)
Age					0.000691
>61	111 (58)		18 (35)	51 (40)
<=61	79 (42)		33 (65)	76 (60)
BMI					0.00309
Obese	46 (24)		5 (10)	16 (13)
Overweight	52 (27)		9 (18)	30 (24)
Normal	69 (36)		25 (50)	61 (48)
Underweight	5 (3)		5 (10)	10 (13)
Histologic grade					1.85e-05
G1	41 (22)		3 (6)	10 (13)
G2	98 (52)		21 (41)	57 (45)
G3	43 (33)		25 (50)	52 (41)
G4	4 (2)		1 (2)	7 (6)
Tumor grade					0.424
T1	99 (52)		30 (59)	72 (57)
T2	42 (22)		9 (18)	34 (27)
T3	41 (22)		11 (22)	19 (15)
T4	8 (4)		1 (2)	2 (2)
Pathologic stage					0.416
Stage I	93 (49)		26 (51)	66 (52)
Stage II	37 (19)		8 (16)	30 (24)
Stage III	45 (24)		11 (22)	18 (14)
Stage IV	3 (2)		-	1 (0.8)
Classifications	C2a (n=64)	C2b (n=126)	C1 (n=51)	C3 (n=127)	P value
Metastasis (%)					3.55e-08
MH	24 (38)	27 (21)	27 (53)	73 (57)
ML	40 (62)	99 (79)	24 (47)	54 (43)
Derek (%)					2.67e-71
CTNNB1	55 (86)	7 (6)	5 (10)	5 (4)
Proliferation	2 (3)	16 (13)	39 (76)	65 (51)
Interferon	5 (8)	27 (21)	7 (14)	34 (27)
Poly 7	-	62 (49)	-	6 (5)
Unannotated	2 (3)	14 (11)	-	17 (13)
RS65 (%)					2.63e-05
High	24 (38)	50 (40)	38 (75)	72 (57)
Low	40 (62)	76 (60)	13 (25)	55 (43)
Hippo (%)					2e-32
AH	55 (86)	97 (77)	2 (4)	29 (23)
SOH	9 (14)	29 (23)	49 (96)	98 (77)
CCL (%)					4.08e-34
CLHCC	-	1 (1)	41 (80)	38 (30)
HCC	64 (100)	125 (99)	10 (20)	89 (70)
Boyault (%)					7.57e-29
G1	10 (16)	23 (18)	6 (12)	16 (13)
G2	-	2 (1)	35 (68)	37 (29)
G3	7 (11)	36 (29)	5 (10)	42 (33)
G5&G6	47 (73)	65 (52)	5 (10)	32 (25)
Hoshida (%)					3.55e-55
S1	5 (8)	1 (1)	16 (31)	78 (61)
S2	1 (1)	5 (4)	29 (57)	11 (9)
S3	58 (91)	120 (95)	6 (12)	38 (30)
Other race: Black or African American; American Indian or Alaska Native. NAs in the clinical information were not listed in the table.
