# Supplementary material for: Establishment and Validation of Novel Prognostic Subtypes in Hepatocellular Carcinoma Based on Bile Acid Metabolism Gene Signatures Using Bulk and Single-Cell RNA-Seq Data
Source: Int J Mol Sci. 2024 Jan 11;25(2):919. doi: 10.3390/ijms25020919 (PMC10815120; doi:10.3390/ijms25020919)
Supplement: Supplementary file 1 [file ijms-25-00919-s001.zip › Table S4.xlsx]

## Sheet: Table S4
Supplementary Table S4: 90 genes for constructing classifier
Symbol	Cluster	log2FC	padj
CEACAM7	C1	6.31183	5.38266e-14
ALDH3B2	C1	6.28528	2.28638e-30
PCSK1	C1	6.17976	1.38777e-72
FGF5	C1	6.14764	1.6546e-18
KLK11	C1	5.81121	1.55415e-22
PPP1R14C	C1	5.77266	2.67461e-55
CBLN2	C1	5.70347	2.24669e-24
NEFL	C1	5.69519	7.08195e-33
SLC34A2	C1	5.45651	1.65394e-27
VTCN1	C1	5.20691	2.25777e-29
SOX21	C1	5.10557	1.24476e-31
DNER	C1	4.95571	2.22878e-17
CFTR	C1	4.9156	8.91786e-23
NLGN1	C1	4.90055	2.00111e-41
SLC6A15	C1	4.88084	1.19046e-08
SFRP2	C1	4.84214	5.47203e-22
CDH17	C1	4.83414	7.04832e-25
HRK	C1	4.83207	3.03981e-31
SCTR	C1	4.81838	4.83549e-56
GALNT5	C1	4.81605	8.57764e-40
CRHR1	C1	4.80037	7.96554e-10
MUC6	C1	4.78098	2.84328e-21
FA2H	C1	4.76007	9.61641e-36
VGLL1	C1	4.74007	3.82972e-12
ZMAT4	C1	4.71731	3.33251e-15
SYT13	C1	4.62869	4.82077e-23
APCDD1L	C1	4.59392	5.33263e-29
KCTD8	C1	4.57016	3.32488e-18
DPYSL5	C1	4.54161	7.89823e-19
CYP24A1	C1	4.52096	1.48289e-16
ANGPTL7	C2	4.51289	6.85175e-28
PRAMEF2	C2	2.3105	5.6234e-08
PRAMEF4	C2	2.27834	1.00282e-07
PRAMEF9	C2	4.47229	1.34791e-26
PADI1	C2	3.3826	4.54145e-21
UBXN10	C2	2.06578	5.01081e-28
SLC30A2	C2	2.21834	3.29373e-13
FNDC5	C2	2.9493	3.51979e-38
MFSD2A	C2	2.35308	1.56919e-23
C1orf87	C2	2.07698	1.62007e-06
GSTM1	C2	3.45639	3.0982e-29
PROK1	C2	3.12244	5.30965e-36
RXRG	C2	2.74265	1.32956e-25
LRRC52	C2	2.65337	4.34705e-12
SLC9C2	C2	2.41385	4.38614e-22
TEDDM1	C2	2.15974	7.96559e-11
RGSL1	C2	3.65584	2.41917e-30
FCAMR	C2	2.06064	8.86894e-16
HSD11B1	C2	2.96442	2.138e-45
USH2A	C2	2.00017	2.79296e-28
ACTN2	C2	2.20308	1.26874e-15
SRD5A2	C2	2.9432	1.87962e-51
BMP10	C2	2.91962	3.03506e-07
LRRTM4	C2	2.26274	4.63503e-11
SMYD1	C2	2.52344	3.44559e-13
TEX37	C2	2.1646	0.0014616
UPP2	C2	2.35612	7.73619e-19
ABCB11	C2	2.4923	8.95607e-39
ACADL	C2	2.26525	5.78971e-34
UGT1A4	C2	2.2763	9.01062e-22
AFP	C3	4.83882	8.52178e-50
DLK1	C3	4.01491	2.51467e-13
BPIFB6	C3	3.8239	3.74542e-13
SLC7A10	C3	3.65374	3.5959e-24
BPIFB2	C3	3.64059	1.4975e-22
BPIFA1	C3	3.51455	2.21312e-09
COL2A1	C3	3.51302	3.53683e-14
OTOP3	C3	3.16349	1.0583e-08
SORCS3	C3	3.14015	5.12763e-08
KRTAP5-5	C3	3.05894	1.77411e-10
CXCL17	C3	3.04955	3.90245e-28
PPP1R3A	C3	3.03383	0.00504841
DGKK	C3	3.01667	1.56621e-14
TRIM71	C3	2.98413	3.29716e-18
FXYD3	C3	2.95294	6.9019e-24
PRSS56	C3	2.94534	5.79263e-08
RBP2	C3	2.92838	6.61487e-20
CT45A10	C3	2.86952	0.00146429
DQX1	C3	2.86861	3.66499e-16
TNNC1	C3	2.84754	1.69928e-36
CADPS	C3	2.83613	3.47928e-17
ART3	C3	2.81611	7.1811e-28
MSI1	C3	2.79746	2.23715e-33
SERPINB11	C3	2.73965	1.60775e-07
PSAPL1	C3	2.7163	8.7162e-11
GPR119	C3	2.70454	7.30686e-08
CST8	C3	2.69082	0.00695449
MCCD1	C3	2.6572	2.01277e-10
GPR50	C3	2.63551	4.46656e-05
SLC6A19	C3	2.61955	1.70845e-09
