# Supplementary material for: Establishment and Validation of Novel Prognostic Subtypes in Hepatocellular Carcinoma Based on Bile Acid Metabolism Gene Signatures Using Bulk and Single-Cell RNA-Seq Data
Source: Int J Mol Sci. 2024 Jan 11;25(2):919. doi: 10.3390/ijms25020919 (PMC10815120; doi:10.3390/ijms25020919)
Supplement: Supplementary file 1 [file ijms-25-00919-s001.zip › Table S5.xlsx]

## Sheet: Sheet1
Table S5: List of potential transcription factors.
Query Name	Rank	TF	Score	Library	Overlapping_Genes
gene_set_query	1	FOXM1	1.167	Literature ChIP-seq,1;ARCHS4 Coexpression,2;ENCODE ChIP-seq,1;Enrichr Queries,1;ReMap ChIP-seq,1;GTEx Coexpression,1	DTYMK,TROAP,KIF11,CENPA,SLC7A1,AURKB,CDC20,CCNB2,CCNB1,ORC6,SNRPD1,CHEK1,MYBL2,GTSE1,UBE2C,PLK1,HMGA1,KIF23,TICRR,ILF3,DDX39A,UBE2S,CKS2,TACC3,KIF2C,RHNO1
gene_set_query	2	CENPA	2	ARCHS4 Coexpression,1;GTEx Coexpression,3	DTYMK,UBE2C,TROAP,PLK1,HMGA1,KIF23,KIF11,AURKB,TICRR,CDC20,CCNB2,CCNB1,ORC6,SNRPD1,UBE2S,CHEK1,CKS2,TACC3,MYBL2,KIF2C,GTSE1,RHNO1
gene_set_query	3	TFDP1	7	ARCHS4 Coexpression,11;Enrichr Queries,9;ReMap ChIP-seq,6;GTEx Coexpression,2	DTYMK,TROAP,KIF11,CENPA,SLC7A1,AURKB,CDC20,CCNB2,CCNB1,ORC6,SNRPD1,CHEK1,MYBL2,GTSE1,UBE2C,PLK1,HMGA1,KIF23,TICRR,ILF3,DDX39A,UBE2S,CKS2,TACC3,KIF2C,SLC27A5,RHNO1
gene_set_query	4	MYBL2	9.167	Literature ChIP-seq,2;ARCHS4 Coexpression,10;ENCODE ChIP-seq,11;Enrichr Queries,2;ReMap ChIP-seq,4;GTEx Coexpression,26	DTYMK,TROAP,KIF11,HSD17B6,EFNA5,CENPA,SLC7A1,AURKB,CDC20,CCNB2,CCNB1,ORC6,SCP2,SNRPD1,CHEK1,MYBL2,GTSE1,SULT2A1,UBE2C,SLC10A1,PLK1,HMGA1,ACSL5,KIF23,BAAT,YWHAZ,TICRR,CYP27A1,ILF3,MARCKS,DDX39A,UBE2S,CKS2,TACC3,KIF2C,SLC27A5
gene_set_query	5	ARID3C	9.5	ARCHS4 Coexpression,4;GTEx Coexpression,15	SLC10A1,ABCB4,NR1I2,PIPOX,HSD17B6,BAAT,ABCB11,EFNA5,CYP8B1,CYP27A1,SCP2,HAO1,ACAA1,AGXT,ALDH8A1,SLC27A2,SLC27A5,SULT2A1
gene_set_query	6	ZNF367	15.33	ARCHS4 Coexpression,34;Enrichr Queries,5;GTEx Coexpression,7	DTYMK,UBE2C,TROAP,PLK1,KIF23,KIF11,CENPA,SLC7A1,AURKB,TICRR,CDC20,CCNB2,CCNB1,ORC6,SNRPD1,UBE2S,CHEK1,CKS2,TACC3,MYBL2,KIF2C,GTSE1
gene_set_query	7	DNMT1	17.5	ARCHS4 Coexpression,27;GTEx Coexpression,8	UBE2C,TROAP,PLK1,KIF23,KIF11,CENPA,AURKB,TICRR,CDC20,CCNB2,CCNB1,ILF3,DDX39A,ORC6,UBE2S,CHEK1,CKS2,TACC3,MYBL2,KIF2C,GTSE1
gene_set_query	8	E2F1	18.83	Literature ChIP-seq,16;ARCHS4 Coexpression,15;ENCODE ChIP-seq,63;Enrichr Queries,3;ReMap ChIP-seq,12;GTEx Coexpression,4	DTYMK,TROAP,KIF11,CENPA,SLC7A1,AURKB,CDC20,CCNB2,CCNB1,ORC6,SNRPD1,CHEK1,MYBL2,GTSE1,UBE2C,EPHX2,PLK1,HMGA1,ACSL5,PIPOX,KIF23,YWHAZ,TICRR,ILF3,DDX39A,UBE2S,CAT,CKS2,TACC3,KIF2C,SLC27A5,RHNO1
gene_set_query	9	NR1I3	20.67	ARCHS4 Coexpression,17;Enrichr Queries,29;GTEx Coexpression,16	SLC10A1,ACSL1,ABCB4,EPHX2,NR1I2,PIPOX,HSD17B6,BAAT,ABCB11,CYP8B1,AURKB,CYP27A1,SCP2,CAT,HAO1,ACAA1,AGXT,ALDH8A1,SLC27A2,SLC27A5,SULT2A1
gene_set_query	10	HMGA1	26.67	ARCHS4 Coexpression,32;Enrichr Queries,42;GTEx Coexpression,6	DTYMK,TROAP,KIF11,SLC7A1,CENPA,AURKB,CDC20,CCNB2,CCNB1,ORC6,SNRPD1,CHEK1,MYBL2,GTSE1,UBE2C,PLK1,KIF23,YWHAZ,TICRR,ILF3,DDX39A,UBE2S,CKS2,TACC3,KIF2C,RHNO1
gene_set_query	11	MLXIPL	28.33	ARCHS4 Coexpression,5;Enrichr Queries,66;GTEx Coexpression,14	SLC10A1,ACSL1,ABCB4,EPHX2,NR1I2,PIPOX,HSD17B6,BAAT,ABCB11,CYP8B1,AURKB,CYP27A1,SCP2,CAT,HAO1,ACAA1,AGXT,ALDH8A1,SLC27A2,SLC27A5,SULT2A1
gene_set_query	12	NR1H4	30.33	ARCHS4 Coexpression,16;Enrichr Queries,65;GTEx Coexpression,10	DTYMK,SLC10A1,ABCB4,EPHX2,NR1I2,PIPOX,ACSL5,HSD17B6,BAAT,CYP8B1,AURKB,CYP27A1,CYP39A1,SCP2,HAO1,ACAA1,AGXT,ALDH8A1,SLC27A2,SLC27A5,SULT2A1
gene_set_query	13	PA2G4	33	ARCHS4 Coexpression,23;GTEx Coexpression,43	UBE2C,PLK1,HMGA1,KIF11,CENPA,AURKB,TICRR,CDC20,CCNB1,ILF3,SNRPD1,UBE2S,CHEK1,MYBL2,KIF2C,GTSE1
gene_set_query	14	ZNF695	35.67	ARCHS4 Coexpression,91;Enrichr Queries,4;GTEx Coexpression,12	DTYMK,UBE2C,TROAP,PLK1,HMGA1,KIF23,KIF11,CENPA,AURKB,TICRR,CDC20,CCNB2,CCNB1,ORC6,SNRPD1,UBE2S,CHEK1,CKS2,TACC3,MYBL2,KIF2C,GTSE1
gene_set_query	15	CREB3L3	36.33	ARCHS4 Coexpression,12;Enrichr Queries,69;GTEx Coexpression,28	ACSL1,ABCB4,EPHX2,NR1I2,PIPOX,ACSL5,HSD17B6,BAAT,ABCB11,CYP8B1,AURKB,CYP27A1,SCP2,CAT,HAO1,AGXT,ALDH8A1,SLC27A2,SLC27A5,SULT2A1
gene_set_query	16	NR1I2	36.75	Literature ChIP-seq,36;ARCHS4 Coexpression,9;Enrichr Queries,72;GTEx Coexpression,30	SLC10A1,ACSL1,EPHX2,ABCB4,AQP9,PIPOX,ACSL5,HSD17B6,BAAT,ABCB11,EFNA5,CYP8B1,AURKB,CYP27A1,SCP2,CAT,HAO1,ACAA1,AGXT,ALDH8A1,SLC27A2,SLC27A5,SULT2A1
gene_set_query	17	HNF4A	43	Literature ChIP-seq,30;ARCHS4 Coexpression,14;ENCODE ChIP-seq,12;Enrichr Queries,131;ReMap ChIP-seq,53;GTEx Coexpression,18	ABCB4,NR1I2,HSD17B6,ABCB11,AURKB,SCP2,SNRPD1,HAO1,ACAA1,SULT2A1,ABCA6,ACSL1,SLC10A1,EPHX2,PLK1,ABCA9,ACSL5,PIPOX,ABCA8,BAAT,CYP8B1,YWHAZ,CYP27A1,CYP39A1,MARCKS,ILF3,CAT,AGXT,ALDH8A1,PEX11G,SLC27A2,SLC27A5
gene_set_query	18	HMGA2	50.33	ARCHS4 Coexpression,66;Enrichr Queries,40;GTEx Coexpression,45	DTYMK,UBE2C,PLK1,HMGA1,KIF23,KIF11,CENPA,AURKB,CDC20,CCNB2,CCNB1,MARCKS,ILF3,CHEK1,MYBL2,KIF2C,GTSE1
gene_set_query	19	ATF5	52	ARCHS4 Coexpression,33;Enrichr Queries,106;GTEx Coexpression,17	SLC10A1,ACSL1,UBE2C,ABCB4,NR1I2,PIPOX,HSD17B6,BAAT,ABCB11,CYP8B1,SLC7A1,AURKB,CYP27A1,CDC20,SCP2,CAT,HAO1,ACAA1,AGXT,ALDH8A1,SLC27A2,SLC27A5
gene_set_query	20	TCF3	57.5	Literature ChIP-seq,47;ARCHS4 Coexpression,55;ENCODE ChIP-seq,79;Enrichr Queries,60;ReMap ChIP-seq,64;GTEx Coexpression,40	TROAP,KIF11,SLC7A1,AURKB,CDC20,CCNB2,CCNB1,ORC6,CHEK1,LONP2,MYBL2,ACAA1,GTSE1,TGFB1,EPHX2,PLK1,HMGA1,PIPOX,KIF23,YWHAZ,CYP39A1,ILF3,MARCKS,DDX39A,UBE2S,CKS2,TACC3,KIF2C,SLC27A2
gene_set_query	21	ETV4	65	ARCHS4 Coexpression,45;Enrichr Queries,35;ReMap ChIP-seq,148;GTEx Coexpression,32	DTYMK,UBE2C,PLK1,HMGA1,KIF23,KIF11,SLC7A1,CENPA,AURKB,TICRR,CDC20,CCNB2,CCNB1,SNRPD1,CHEK1,TACC3,MYBL2,KIF2C,ACAA1,GTSE1,SLC27A5,RHNO1
gene_set_query	22	ZNF878	66	ARCHS4 Coexpression,72;GTEx Coexpression,60	CCNB1,ORC6,SNRPD1,UBE2C,CHEK1,CKS2,MYBL2,KIF23,KIF11,CENPA,AURKB
gene_set_query	23	HNF1A	69.67	ARCHS4 Coexpression,82;Enrichr Queries,100;GTEx Coexpression,27	TGFB1,SLC10A1,EPHX2,NR1I2,PIPOX,HSD17B6,BAAT,CYP8B1,AURKB,SCP2,HAO1,ACAA1,AGXT,ALDH8A1,SLC27A2,SLC27A5,SULT2A1
gene_set_query	24	E2F7	83.4	Literature ChIP-seq,160;ARCHS4 Coexpression,6;Enrichr Queries,7;ReMap ChIP-seq,235;GTEx Coexpression,9	UBE2C,TROAP,PLK1,HMGA1,KIF23,KIF11,CENPA,SLC7A1,AURKB,TICRR,CDC20,CCNB2,CCNB1,ILF3,ORC6,SNRPD1,UBE2S,CHEK1,CKS2,TACC3,MYBL2,KIF2C,GTSE1
gene_set_query	25	PLAGL2	88	ARCHS4 Coexpression,74;Enrichr Queries,116;GTEx Coexpression,74	ACSL1,TROAP,PLK1,HMGA1,KIF11,SLC7A1,AURKB,TICRR,CCNB2,ILF3,DDX39A,TACC3,KIF2C,MYBL2
gene_set_query	26	KLF15	90.67	ARCHS4 Coexpression,47;Enrichr Queries,128;GTEx Coexpression,97	CYP27A1,ABCA6,ACSL1,EPHX2,HAO1,HSD17B6,AGXT,BAAT,ABCB11,YWHAZ,AURKB,RHNO1
gene_set_query	27	ZBED4	90.67	ARCHS4 Coexpression,143;Enrichr Queries,75;GTEx Coexpression,54	ILF3,UBE2C,CHEK1,HMGA1,CKS2,TACC3,MYBL2,KIF11,SLC7A1,CENPA,AURKB,TICRR
gene_set_query	28	ZNF888	91	GTEx Coexpression,91	CHEK1,KIF23,KIF11,CENPA
gene_set_query	29	FOXA3	95	ARCHS4 Coexpression,13;Enrichr Queries,155;GTEx Coexpression,117	EPHX2,NR1I2,PIPOX,HSD17B6,BAAT,CYP8B1,AURKB,SCP2,HAO1,ACAA1,AGXT,SLC27A2,SULT2A1
gene_set_query	30	HIC2	96	ARCHS4 Coexpression,31;Enrichr Queries,61;GTEx Coexpression,196	PLK1,HMGA1,KIF11,YWHAZ,SLC7A1,AURKB,TICRR,ILF3,MARCKS,UBE2S,CHEK1,TACC3,KIF2C,MYBL2
gene_set_query	31	ZNF730	100.5	ARCHS4 Coexpression,159;GTEx Coexpression,42	CDC20,CCNB2,MARCKS,ORC6,UBE2S,TROAP,PLK1,CHEK1,CKS2,KIF2C,KIF11,GTSE1
gene_set_query	32	MYB	103.3	Literature ChIP-seq,95;ARCHS4 Coexpression,211;ENCODE ChIP-seq,10;Enrichr Queries,21;ReMap ChIP-seq,163;GTEx Coexpression,120	DTYMK,ABCB4,AQP9,KIF11,CENPA,AURKB,CDC20,CCNB2,CCNB1,CHEK1,MYBL2,UBE2C,ACSL1,PLK1,HMGA1,ACSL5,PIPOX,KIF23,ILF3,DDX39A,CAT,CKS2,TACC3,KIF2C,SLC27A2,SLC27A5
gene_set_query	33	NR2F6	109.5	ARCHS4 Coexpression,243;Enrichr Queries,67;ReMap ChIP-seq,72;GTEx Coexpression,56	UBE2C,EPHX2,NR1I2,PLK1,HMGA1,ACSL5,CYP8B1,AURKB,CYP27A1,CDC20,CCNB2,CCNB1,SCP2,UBE2S,MYBL2,ACAA1,AGXT,SLC27A5
gene_set_query	34	FOSL1	110	ARCHS4 Coexpression,177;ENCODE ChIP-seq,50;Enrichr Queries,41;ReMap ChIP-seq,214;GTEx Coexpression,68	DTYMK,UBE2C,ACSL1,PLK1,HMGA1,ACSL5,KIF23,KIF11,SLC7A1,AURKB,CDC20,CCNB2,CCNB1,SNRPD1,UBE2S,CKS2,KIF2C,MYBL2
gene_set_query	35	TP53	114	Literature ChIP-seq,110;ARCHS4 Coexpression,20;Enrichr Queries,48;ReMap ChIP-seq,245;GTEx Coexpression,147	TGFB1,UBE2C,PLK1,HMGA1,EFNA5,YWHAZ,SLC7A1,AURKB,TICRR,CDC20,AR,CCNB1,ILF3,CHEK1,CAT,TACC3,MYBL2,GTSE1
gene_set_query	36	GATAD2A	116	ARCHS4 Coexpression,44;Enrichr Queries,148;GTEx Coexpression,156	ILF3,DDX39A,TGFB1,TACC3,HMGA1,MYBL2,YWHAZ,SLC7A1,AURKB
gene_set_query	37	CENPX	118	GTEx Coexpression,118	DTYMK,PIPOX,ACAA1
gene_set_query	38	TMF1	119.5	ARCHS4 Coexpression,38;GTEx Coexpression,201	CDC20,ILF3,UBE2S,PLK1,HMGA1,KIF2C,MYBL2,AURKB
gene_set_query	39	HNF4G	120	ARCHS4 Coexpression,237;ENCODE ChIP-seq,15;Enrichr Queries,103;ReMap ChIP-seq,91;GTEx Coexpression,154	CYP27A1,EPHX2,NR1I2,ACSL5,PIPOX,AGXT,EFNA5,SLC27A2,CYP8B1,SLC27A5,AURKB
gene_set_query	40	ZNF574	123.3	ARCHS4 Coexpression,78;Enrichr Queries,98;GTEx Coexpression,194	CDC20,ILF3,DDX39A,PLK1,HMGA1,TACC3,KIF2C,ACAA1,AURKB,TICRR
gene_set_query	41	MYBL1	126	Literature ChIP-seq,10;ARCHS4 Coexpression,61;Enrichr Queries,17;GTEx Coexpression,416	TGFB1,UBE2C,TROAP,PLK1,KIF23,KIF11,CENPA,AURKB,CDC20,CCNB2,CCNB1,ILF3,ORC6,UBE2S,CHEK1,CKS2,TACC3,MYBL2,KIF2C,GTSE1
gene_set_query	42	SALL4	126.3	Literature ChIP-seq,41;ARCHS4 Coexpression,115;Enrichr Queries,49;GTEx Coexpression,300	UBE2C,PLK1,HMGA1,ACSL5,KIF11,EFNA5,AURKB,CDC20,ILF3,CCNB1,ORC6,SNRPD1,CHEK1,CAT,MYBL2,KIF2C
gene_set_query	43	GATA2	127	Literature ChIP-seq,38;ARCHS4 Coexpression,109;ENCODE ChIP-seq,7;Enrichr Queries,346;ReMap ChIP-seq,18;GTEx Coexpression,244	TGFB1,ACSL1,UBE2C,SLC10A1,ABCA6,EPHX2,AQP9,ABCA9,PIPOX,KIF23,ABCB11,YWHAZ,AURKB,CDC20,AR,MARCKS,ILF3,DDX39A,CAT,TACC3,LONP2,MYBL2,KIF2C,SULT2A1
gene_set_query	44	ZNF296	128	ARCHS4 Coexpression,225;Enrichr Queries,63;GTEx Coexpression,96	CDC20,DDX39A,UBE2C,UBE2S,PLK1,CKS2,HMGA1,TACC3,MYBL2,AURKB,RHNO1
gene_set_query	45	PRMT3	131.7	ARCHS4 Coexpression,62;Enrichr Queries,30;GTEx Coexpression,303	UBE2C,PLK1,HMGA1,KIF23,KIF11,SLC7A1,CENPA,AURKB,TICRR,CDC20,CCNB1,DDX39A,SNRPD1,CHEK1,CKS2,KIF2C
gene_set_query	46	TIGD2	132.3	ARCHS4 Coexpression,179;Enrichr Queries,193;GTEx Coexpression,25	SLC10A1,ACSL1,ABCB4,NR1I2,PIPOX,HSD17B6,BAAT,ABCB11,CYP8B1,CENPA,AURKB,TICRR,MARCKS,SCP2,CKS2,HAO1,KIF2C,AGXT,ALDH8A1,SLC27A2,SLC27A5
gene_set_query	47	ZNF215	141	ARCHS4 Coexpression,352;Enrichr Queries,37;GTEx Coexpression,34	DTYMK,UBE2C,TROAP,PLK1,HMGA1,KIF23,KIF11,CENPA,AURKB,TICRR,CDC20,CCNB2,CCNB1,ORC6,SNRPD1,CHEK1,CKS2,MYBL2,KIF2C,GTSE1
gene_set_query	48	TGIF2	141.3	ARCHS4 Coexpression,21;Enrichr Queries,26;ReMap ChIP-seq,23;GTEx Coexpression,495	DTYMK,UBE2C,PLK1,HMGA1,KIF23,KIF11,AURKB,TICRR,CDC20,CCNB2,CCNB1,ILF3,ORC6,CHEK1,CKS2,TACC3,MYBL2,KIF2C,AGXT
gene_set_query	49	ZNF726	141.5	ARCHS4 Coexpression,272;GTEx Coexpression,11	DTYMK,UBE2C,PLK1,HMGA1,KIF23,KIF11,CENPA,AURKB,TICRR,CDC20,CCNB1,ORC6,SNRPD1,CHEK1,MYBL2,GTSE1,SLC27A5,RHNO1
gene_set_query	50	E2F3	144	ARCHS4 Coexpression,19;Enrichr Queries,6;GTEx Coexpression,407	UBE2C,AQP9,PLK1,HMGA1,KIF23,KIF11,YWHAZ,SLC7A1,CENPA,AURKB,TICRR,CDC20,CCNB2,CCNB1,MARCKS,ILF3,ORC6,CHEK1,CKS2,TACC3,MYBL2,KIF2C
gene_set_query	51	CEBPA	144.4	Literature ChIP-seq,34;ARCHS4 Coexpression,64;Enrichr Queries,363;ReMap ChIP-seq,82;GTEx Coexpression,179	CYP27A1,DTYMK,SCP2,ACSL1,SLC10A1,CAT,CHEK1,CKS2,LONP2,ACAA1,AGXT,AURKB
gene_set_query	52	ZNF202	147.7	ARCHS4 Coexpression,70;Enrichr Queries,80;GTEx Coexpression,293	CDC20,ILF3,UBE2C,CHEK1,HMGA1,TACC3,SLC7A1,AURKB,TICRR
gene_set_query	53	MYC	150.2	Literature ChIP-seq,9;ARCHS4 Coexpression,141;ENCODE ChIP-seq,23;Enrichr Queries,44;ReMap ChIP-seq,54;GTEx Coexpression,630	DTYMK,KIF11,SLC7A1,CENPA,AURKB,CDC20,CCNB2,CCNB1,ORC6,CHEK1,MYBL2,GTSE1,TGFB1,UBE2C,PLK1,HMGA1,ACSL5,KIF23,YWHAZ,TICRR,ILF3,MARCKS,DDX39A,UBE2S,TACC3,CKS2,KIF2C,SLC27A5
gene_set_query	54	NME2	153.3	ARCHS4 Coexpression,138;ReMap ChIP-seq,191;GTEx Coexpression,131	CDC20,DTYMK,SNRPD1,UBE2S,PLK1,ABCA9,PIPOX,MYBL2
gene_set_query	55	E2F2	155	ARCHS4 Coexpression,30;Enrichr Queries,10;GTEx Coexpression,425	UBE2C,TROAP,PLK1,HMGA1,KIF23,KIF11,CENPA,AURKB,TICRR,CDC20,CCNB2,CCNB1,ORC6,CHEK1,CAT,TACC3,CKS2,MYBL2,KIF2C,GTSE1
gene_set_query	56	CBX2	158.4	ARCHS4 Coexpression,24;ENCODE ChIP-seq,110;Enrichr Queries,11;ReMap ChIP-seq,270;GTEx Coexpression,377	TROAP,KIF11,CENPA,AURKB,CDC20,CCNB2,CCNB1,ORC6,SCP2,CHEK1,MYBL2,MLYCD,GTSE1,UBE2C,PLK1,HMGA1,KIF23,TICRR,CYP27A1,MARCKS,ILF3,UBE2S,CKS2,TACC3,KIF2C
gene_set_query	57	MXD3	162.7	ARCHS4 Coexpression,18;Enrichr Queries,8;GTEx Coexpression,462	DTYMK,UBE2C,TROAP,AQP9,PLK1,KIF23,KIF11,CENPA,AURKB,TICRR,CDC20,CCNB2,CCNB1,UBE2S,SNRPD1,CHEK1,CKS2,TACC3,MYBL2,KIF2C,GTSE1
gene_set_query	58	NANOG	162.8	Literature ChIP-seq,11;ARCHS4 Coexpression,196;ENCODE ChIP-seq,118;Enrichr Queries,143;ReMap ChIP-seq,256;GTEx Coexpression,253	UBE2C,HMGA1,PIPOX,YWHAZ,AURKB,CCNB1,ORC6,SNRPD1,CHEK1,CKS2,MYBL2,SLC27A2,SULT2A1
gene_set_query	59	MTF2	165.3	Literature ChIP-seq,137;ARCHS4 Coexpression,278;GTEx Coexpression,81	AR,ILF3,MARCKS,ORC6,TGFB1,SNRPD1,ABCB4,CHEK1,CKS2,MYBL2,EFNA5,SLC7A1
gene_set_query	60	MYRFL	175.5	ARCHS4 Coexpression,209;GTEx Coexpression,142	EPHX2,NR1I2,ACSL5
gene_set_query	61	CHAMP1	176.5	ARCHS4 Coexpression,22;GTEx Coexpression,331	ILF3,CHEK1,PLK1,HMGA1,TACC3,MYBL2,KIF2C,KIF11,SLC7A1,TICRR
gene_set_query	62	ZKSCAN1	184	ARCHS4 Coexpression,234;ENCODE ChIP-seq,18;Enrichr Queries,395;ReMap ChIP-seq,207;GTEx Coexpression,66	DTYMK,TGFB1,EPHX2,HMGA1,YWHAZ,SLC7A1,AURKB,CYP39A1,MARCKS,DDX39A,SCP2,LONP2,AGXT,SLC27A5
gene_set_query	63	TEAD4	186	Literature ChIP-seq,144;ARCHS4 Coexpression,36;ENCODE ChIP-seq,19;Enrichr Queries,39;ReMap ChIP-seq,252;GTEx Coexpression,626	UBE2C,ABCA6,TROAP,PLK1,HMGA1,ACSL5,KIF23,KIF11,SLC7A1,YWHAZ,AURKB,TICRR,CDC20,CCNB1,DDX39A,SNRPD1,UBE2S,CKS2,LONP2,MYBL2,KIF2C
gene_set_query	64	CXXC1	188	ARCHS4 Coexpression,201;Enrichr Queries,158;GTEx Coexpression,205	ILF3,DDX39A,TGFB1,HMGA1,TACC3,YWHAZ,AURKB
gene_set_query	65	ZBED3	190.7	ARCHS4 Coexpression,146;Enrichr Queries,188;GTEx Coexpression,238	CCNB1,MARCKS,ILF3,CAT,SLC7A1,AURKB
gene_set_query	66	TFDP2	196	ARCHS4 Coexpression,187;Enrichr Queries,194;GTEx Coexpression,207	CCNB1,ORC6,ACSL1,SNRPD1,CHEK1,KIF2C,KIF11,AURKB
gene_set_query	67	ZNF496	196	ARCHS4 Coexpression,142;Enrichr Queries,144;GTEx Coexpression,302	MARCKS,ILF3,SCP2,HMGA1,MYBL2,YWHAZ,SLC7A1,AURKB,TICRR
gene_set_query	68	PPARG	196.2	Literature ChIP-seq,4;ARCHS4 Coexpression,614;Enrichr Queries,140;ReMap ChIP-seq,7;GTEx Coexpression,216	ACSL1,PLK1,HMGA1,ACSL5,ABCB11,EFNA5,AURKB,CDC20,UBE2S,CAT,LONP2,MLYCD,ACAA1
gene_set_query	69	ARID3B	197	ARCHS4 Coexpression,54;GTEx Coexpression,340	ILF3,CHEK1,TACC3,HMGA1,MYBL2,TICRR
gene_set_query	70	ADNP	198.3	ARCHS4 Coexpression,295;Enrichr Queries,218;ReMap ChIP-seq,59;GTEx Coexpression,221	ILF3,MARCKS,DDX39A,SCP2,HMGA1,ABCB11,EFNA5,YWHAZ,AURKB
gene_set_query	71	ZKSCAN4	199	ARCHS4 Coexpression,217;Enrichr Queries,330;GTEx Coexpression,50	CCNB2,DDX39A,TROAP,PLK1,CAT,CKS2,TACC3,ABCA9,KIF2C,KIF11,AURKB
gene_set_query	72	TET1	205.3	Literature ChIP-seq,132;ARCHS4 Coexpression,370;GTEx Coexpression,114	TGFB1,ABCA6,CHEK1,ABCA9,PIPOX,KIF23,ABCA8,SLC27A2,TICRR
gene_set_query	73	NKX24	206	ARCHS4 Coexpression,127;GTEx Coexpression,285	UBE2S,MYBL2,SLC27A5,TICRR
gene_set_query	74	CEBPB	206.2	Literature ChIP-seq,37;ARCHS4 Coexpression,140;ENCODE ChIP-seq,41;Enrichr Queries,554;ReMap ChIP-seq,276;GTEx Coexpression,189	DTYMK,TGFB1,ACSL1,SLC10A1,ABCA6,TROAP,AQP9,ACSL5,PIPOX,KIF23,KIF11,SLC7A1,AURKB,CYP27A1,CDC20,ILF3,ORC6,UBE2S,CAT,LONP2,MLYCD,AGXT,SULT2A1
gene_set_query	75	GTF2B	206.3	ARCHS4 Coexpression,349;ENCODE ChIP-seq,64;ReMap ChIP-seq,46;GTEx Coexpression,366	UBE2C,EPHX2,AQP9,PLK1,HMGA1,KIF23,KIF11,AURKB,CDC20,ILF3,CKS2,LONP2,KIF2C,PEX11G,SLC27A5
gene_set_query	76	CEBPD	207	Literature ChIP-seq,130;ARCHS4 Coexpression,514;ENCODE ChIP-seq,48;ReMap ChIP-seq,169;GTEx Coexpression,174	MARCKS,DDX39A,TGFB1,ABCA6,ACSL1,CAT,ABCA9,HMGA1,TACC3,CKS2,YWHAZ
gene_set_query	77	ZNF280A	208.3	ARCHS4 Coexpression,94;Enrichr Queries,285;GTEx Coexpression,246	CDC20,CCNB1,UBE2C,MYBL2,KIF2C,CENPA,AURKB,SULT2A1
gene_set_query	78	TIGD3	211.3	ARCHS4 Coexpression,444;Enrichr Queries,52;GTEx Coexpression,138	CDC20,TGFB1,ACSL1,UBE2C,UBE2S,AQP9,PLK1,TACC3,CKS2,MYBL2,KIF11,AURKB
gene_set_query	79	SREBF2	212.7	Literature ChIP-seq,131;ARCHS4 Coexpression,265;ENCODE ChIP-seq,99;Enrichr Queries,150;ReMap ChIP-seq,238;GTEx Coexpression,393	ILF3,DDX39A,SNRPD1,HMGA1,TACC3,MYBL2,YWHAZ,SLC7A1,CYP8B1,AURKB
gene_set_query	80	CREBL2	213	ARCHS4 Coexpression,148;Enrichr Queries,220;GTEx Coexpression,271	CYP27A1,MARCKS,ACSL1,SNRPD1,CAT,AURKB,SULT2A1
gene_set_query	81	ZNF581	213.7	ARCHS4 Coexpression,117;Enrichr Queries,165;GTEx Coexpression,359	CDC20,DTYMK,TGFB1,DDX39A,CKS2,HMGA1,MYBL2,AURKB
gene_set_query	82	PROX1	214	ARCHS4 Coexpression,7;Enrichr Queries,591;ReMap ChIP-seq,239;GTEx Coexpression,19	SLC10A1,ABCB4,EPHX2,PIPOX,ACSL5,HSD17B6,BAAT,ABCB11,EFNA5,CYP8B1,AURKB,CYP27A1,SCP2,HAO1,KIF2C,ACAA1,AGXT,ALDH8A1,SLC27A2,SLC27A5,SULT2A1
gene_set_query	83	NKX12	214.5	ARCHS4 Coexpression,251;GTEx Coexpression,178	CCNB1,CHEK1,HMGA1,YWHAZ,SLC7A1
gene_set_query	84	THAP4	214.7	ARCHS4 Coexpression,255;Enrichr Queries,134;GTEx Coexpression,255	DTYMK,DDX39A,UBE2S,CKS2,HMGA1,MYBL2,MLYCD,AURKB
gene_set_query	85	DNTTIP1	215.5	ARCHS4 Coexpression,56;GTEx Coexpression,375	CDC20,DTYMK,UBE2S,AQP9,HMGA1,TACC3
gene_set_query	86	SRCAP	216.7	ARCHS4 Coexpression,214;Enrichr Queries,164;GTEx Coexpression,272	ILF3,PLK1,HMGA1,YWHAZ,SLC7A1,AURKB,TICRR
gene_set_query	87	VDR	221.2	Literature ChIP-seq,12;ARCHS4 Coexpression,242;Enrichr Queries,367;ReMap ChIP-seq,25;GTEx Coexpression,460	TGFB1,ACSL1,NR1I2,AQP9,HMGA1,ACSL5,PIPOX,EFNA5,AURKB,CDC20,MARCKS,DDX39A,TACC3,KIF2C,PEX11G,SLC27A2
gene_set_query	88	THAP10	223.7	ARCHS4 Coexpression,40;Enrichr Queries,34;GTEx Coexpression,597	DTYMK,TGFB1,UBE2C,PLK1,KIF23,KIF11,CENPA,AURKB,CDC20,CCNB2,CCNB1,ORC6,CKS2,TACC3,KIF2C
gene_set_query	89	ZNF200	224.3	ARCHS4 Coexpression,356;Enrichr Queries,237;GTEx Coexpression,80	MARCKS,DDX39A,UBE2S,TACC3,ABCA9,KIF2C,YWHAZ,CENPA,AURKB,SLC27A5
gene_set_query	90	ZNF107	227.7	ARCHS4 Coexpression,288;Enrichr Queries,68;GTEx Coexpression,327	CCNB1,UBE2C,CHEK1,CKS2,MYBL2,KIF23,KIF2C,KIF11,AURKB
gene_set_query	91	CTCF	228	Literature ChIP-seq,60;ARCHS4 Coexpression,39;ENCODE ChIP-seq,25;Enrichr Queries,86;ReMap ChIP-seq,216;GTEx Coexpression,942	DTYMK,TROAP,ABCB4,NR1I2,KIF11,HSD17B6,SLC7A1,AURKB,CDC20,CCNB2,CCNB1,SNRPD1,MYBL2,MLYCD,GTSE1,TGFB1,PLK1,HMGA1,PIPOX,KIF23,YWHAZ,TICRR,ILF3,TACC3,CKS2,KIF2C
gene_set_query	92	SAFB	228.5	ARCHS4 Coexpression,111;GTEx Coexpression,346	ILF3,HMGA1,TACC3,MYBL2
gene_set_query	93	GSC	228.7	ARCHS4 Coexpression,114;Enrichr Queries,465;GTEx Coexpression,107	CCNB1,ABCA6,UBE2C,CAT,ABCA9,CKS2,MYBL2,EFNA5,AURKB
gene_set_query	94	RARA	229.8	Literature ChIP-seq,46;ARCHS4 Coexpression,462;Enrichr Queries,322;ReMap ChIP-seq,144;GTEx Coexpression,175	TGFB1,ABCA6,UBE2C,ABCB4,AQP9,NR1I2,HMGA1,ABCA9,BAAT,AURKB,CYP27A1,DDX39A,UBE2S,TACC3
gene_set_query	95	ZNF384	230	ARCHS4 Coexpression,391;ENCODE ChIP-seq,44;Enrichr Queries,230;ReMap ChIP-seq,147;GTEx Coexpression,338	TGFB1,ABCA6,HMGA1,KIF23,KIF11,YWHAZ,SLC7A1,CENPA,AURKB,CYP39A1,ILF3,MARCKS,DDX39A,CAT,KIF2C,SLC27A5
gene_set_query	96	ELK1	232.2	Literature ChIP-seq,67;ARCHS4 Coexpression,204;ENCODE ChIP-seq,62;ReMap ChIP-seq,166;GTEx Coexpression,662	DTYMK,ACSL1,HMGA1,KIF23,YWHAZ,SLC7A1,CCNB1,ILF3,DDX39A,SNRPD1,CAT,CKS2,LONP2,PEX11G,ACAA1,SLC27A5
gene_set_query	97	KMT2B	232.5	ARCHS4 Coexpression,354;ReMap ChIP-seq,111	DTYMK,ILF3,TGFB1,SNRPD1,PIPOX,SLC27A5
gene_set_query	98	MEF2B	232.5	ARCHS4 Coexpression,409;Enrichr Queries,104;ReMap ChIP-seq,222;GTEx Coexpression,195	CCNB1,TGFB1,PLK1,TACC3,CKS2,HMGA1,KIF2C,MYBL2,AURKB
gene_set_query	99	NFYA	232.8	ARCHS4 Coexpression,929;ENCODE ChIP-seq,4;Enrichr Queries,109;ReMap ChIP-seq,33;GTEx Coexpression,89	DTYMK,TROAP,CENPA,AURKB,CDC20,CCNB2,CCNB1,ORC6,MLYCD,ACAA1,GTSE1,UBE2C,HMGA1,KIF23,YWHAZ,ILF3,MARCKS,DDX39A,UBE2S,CAT,TACC3,CKS2,KIF2C,PEX11G
gene_set_query	100	ZNF93	238.3	ARCHS4 Coexpression,640;Enrichr Queries,18;GTEx Coexpression,57	UBE2C,PLK1,KIF23,KIF11,CENPA,AURKB,TICRR,CDC20,CCNB2,CCNB1,ORC6,CHEK1,CKS2,TACC3,MYBL2,KIF2C,GTSE1
gene_set_query	101	PITX1	238.3	ARCHS4 Coexpression,456;Enrichr Queries,87;GTEx Coexpression,172	CDC20,CCNB2,UBE2C,UBE2S,PLK1,HMGA1,MYBL2,SLC7A1,AURKB,TICRR
gene_set_query	102	TFAP2C	238.5	Literature ChIP-seq,69;ARCHS4 Coexpression,410;ENCODE ChIP-seq,115;Enrichr Queries,300;ReMap ChIP-seq,141;GTEx Coexpression,396	CDC20,TGFB1,TACC3,CKS2,MYBL2,KIF23,MLYCD,EFNA5,CENPA,YWHAZ,SLC27A2,AURKB
gene_set_query	103	ZNF511	242.7	ARCHS4 Coexpression,253;Enrichr Queries,32;GTEx Coexpression,443	DTYMK,UBE2C,PLK1,HMGA1,AURKB,CDC20,CCNB1,DDX39A,UBE2S,CKS2,TACC3,MYBL2,KIF2C,MLYCD
gene_set_query	104	SNAPC4	242.8	ARCHS4 Coexpression,259;Enrichr Queries,181;ReMap ChIP-seq,126;GTEx Coexpression,405	CYP39A1,ILF3,DDX39A,UBE2C,PLK1,LONP2,KIF2C,MYBL2,KIF11,SLC7A1,AURKB
gene_set_query	105	PCGF2	243	ARCHS4 Coexpression,229;ReMap ChIP-seq,257	ILF3,UBE2S,TROAP,HMGA1,EFNA5
gene_set_query	106	ZNF589	247.5	ARCHS4 Coexpression,122;Enrichr Queries,183;ReMap ChIP-seq,228;GTEx Coexpression,457	ILF3,PLK1,CHEK1,HMGA1,KIF2C,MYBL2,KIF11,CENPA,AURKB,TICRR
gene_set_query	107	ZNF207	248.3	ARCHS4 Coexpression,205;Enrichr Queries,434;ReMap ChIP-seq,65;GTEx Coexpression,289	ILF3,DDX39A,TGFB1,HMGA1,KIF2C,KIF23,KIF11,YWHAZ,AURKB,TICRR
gene_set_query	108	ZSCAN5B	249.3	ARCHS4 Coexpression,106;Enrichr Queries,219;GTEx Coexpression,423	CCNB1,UBE2S,UBE2C,PIPOX,MYBL2,KIF2C,SLC27A2,CENPA,AURKB
gene_set_query	109	E2F8	250.7	ARCHS4 Coexpression,3;Enrichr Queries,15;GTEx Coexpression,734	UBE2C,TROAP,PLK1,KIF23,KIF11,CENPA,AURKB,TICRR,CDC20,CCNB2,CCNB1,ILF3,ORC6,CHEK1,CKS2,TACC3,MYBL2,KIF2C,GTSE1
gene_set_query	110	HOXA1	255	ARCHS4 Coexpression,48;Enrichr Queries,602;GTEx Coexpression,115	CDC20,CCNB1,UBE2S,PLK1,HMGA1,MYBL2,KIF2C,SLC7A1,AURKB,TICRR
gene_set_query	111	NR1H3	255.4	Literature ChIP-seq,104;ARCHS4 Coexpression,460;Enrichr Queries,416;ReMap ChIP-seq,197;GTEx Coexpression,100	CYP39A1,CYP27A1,ABCA6,ACSL1,CAT,ABCA9,CKS2,LONP2,AURKB
gene_set_query	112	KIN	255.7	ARCHS4 Coexpression,161;Enrichr Queries,91;GTEx Coexpression,515	CCNB1,ORC6,UBE2C,AQP9,CKS2,TACC3,ABCA9,KIF23,KIF11,AURKB,SLC27A5
gene_set_query	113	ONECUT1	256.8	ARCHS4 Coexpression,28;Enrichr Queries,948;ReMap ChIP-seq,3;GTEx Coexpression,48	SLC10A1,ABCA6,ABCB4,ACSL5,PIPOX,HSD17B6,ABCA8,BAAT,ABCB11,CYP8B1,AURKB,SCP2,CAT,LONP2,HAO1,AGXT,ALDH8A1,SLC27A2,SLC27A5,SULT2A1
gene_set_query	114	TCF23	257.3	ARCHS4 Coexpression,284;Enrichr Queries,288;GTEx Coexpression,200	AR,EPHX2,ABCA9,AGXT,AURKB,SLC27A5
gene_set_query	115	ZNF281	257.7	ARCHS4 Coexpression,110;Enrichr Queries,186;GTEx Coexpression,477	MARCKS,CCNB1,ACSL1,SNRPD1,AQP9,CHEK1,CKS2,YWHAZ,AURKB
gene_set_query	116	GATA1	258	Literature ChIP-seq,44;ARCHS4 Coexpression,880;ENCODE ChIP-seq,21;Enrichr Queries,76;ReMap ChIP-seq,90;GTEx Coexpression,437	DTYMK,ABCB4,AQP9,ABCB11,EFNA5,SLC7A1,AURKB,CDC20,CCNB2,CCNB1,LONP2,MYBL2,TGFB1,ACSL1,UBE2C,PLK1,ACSL5,KIF23,YWHAZ,ILF3,DDX39A,CAT,CKS2,KIF2C,ALDH8A1
gene_set_query	117	HESX1	258.3	ARCHS4 Coexpression,258;Enrichr Queries,422;GTEx Coexpression,95	ORC6,SNRPD1,CHEK1,CKS2,PIPOX,CENPA,SLC27A2,AURKB
gene_set_query	118	CENPS	259	ARCHS4 Coexpression,120;GTEx Coexpression,398	DTYMK,CCNB1,SNRPD1,KIF2C,AURKB
gene_set_query	119	ZBTB2	260.7	ARCHS4 Coexpression,167;Enrichr Queries,88;GTEx Coexpression,527	MARCKS,DDX39A,PLK1,CKS2,HMGA1,TACC3,MYBL2,YWHAZ,AURKB
gene_set_query	120	NKX28	261.5	ARCHS4 Coexpression,81;GTEx Coexpression,442	CDC20,UBE2S,TROAP,PLK1,HMGA1
gene_set_query	121	ZBTB8A	261.5	ARCHS4 Coexpression,290;GTEx Coexpression,233	ORC6,ABCA6,SLC27A5
gene_set_query	122	ZNF675	262.3	ARCHS4 Coexpression,311;Enrichr Queries,424;GTEx Coexpression,52	CCNB2,ORC6,TROAP,PLK1,ABCA9,MYBL2,KIF11,YWHAZ,AURKB,SLC27A5,RHNO1
gene_set_query	123	NFE2L2	262.8	Literature ChIP-seq,22;ARCHS4 Coexpression,439;Enrichr Queries,182;ReMap ChIP-seq,103;GTEx Coexpression,568	TGFB1,ACSL1,HMGA1,EFNA5,YWHAZ,AURKB,CYP27A1,CYP39A1,MARCKS,CAT,KIF2C,MLYCD,PEX11G,ALDH8A1
gene_set_query	124	ZIC2	263	ARCHS4 Coexpression,35;Enrichr Queries,215;GTEx Coexpression,539	CDC20,CCNB2,CCNB1,UBE2C,SNRPD1,CHEK1,HMGA1,CKS2,KIF23,EFNA5,AURKB
gene_set_query	125	RBPJ	264.6	Literature ChIP-seq,94;ARCHS4 Coexpression,602;Enrichr Queries,211;ReMap ChIP-seq,157;GTEx Coexpression,259	PLK1,ABCA9,HMGA1,PIPOX,YWHAZ,SLC7A1,AURKB,MARCKS,SNRPD1,UBE2S,CKS2,KIF2C,AGXT,GTSE1
gene_set_query	126	BHLHE23	266.5	ARCHS4 Coexpression,443;GTEx Coexpression,90	ILF3,ORC6,MYBL2,CENPA,AURKB
gene_set_query	127	BCL6	268.2	Literature ChIP-seq,119;ARCHS4 Coexpression,505;Enrichr Queries,334;ReMap ChIP-seq,210;GTEx Coexpression,173	MARCKS,TGFB1,ACSL1,AQP9,HMGA1,TACC3,MYBL2,KIF11,MLYCD,EFNA5,YWHAZ,AURKB
gene_set_query	128	E2F4	268.7	Literature ChIP-seq,3;ARCHS4 Coexpression,112;ENCODE ChIP-seq,2;Enrichr Queries,51;ReMap ChIP-seq,2;GTEx Coexpression,1442	DTYMK,TGFB1,UBE2C,TROAP,PLK1,HMGA1,KIF23,KIF11,CENPA,AURKB,CDC20,CCNB2,CCNB1,ILF3,DDX39A,ORC6,UBE2S,SNRPD1,CHEK1,TACC3,MYBL2,KIF2C,GTSE1
gene_set_query	129	TSHZ2	271	ARCHS4 Coexpression,43;Enrichr Queries,633;GTEx Coexpression,137	ABCA6,ABCA9,HMGA1,TACC3,ABCA8,EFNA5,AURKB,SLC27A5
gene_set_query	130	ZNF735	272	ARCHS4 Coexpression,96;GTEx Coexpression,448	CCNB1,ORC6,UBE2S,UBE2C,CENPA
gene_set_query	131	HOXD13	279.5	Literature ChIP-seq,151;ARCHS4 Coexpression,53;Enrichr Queries,467;GTEx Coexpression,447	AR,ILF3,UBE2S,PLK1,MYBL2,EFNA5,SLC7A1,AURKB,TICRR
gene_set_query	132	RELA	280.5	Literature ChIP-seq,122;ARCHS4 Coexpression,294;ENCODE ChIP-seq,46;Enrichr Queries,222;ReMap ChIP-seq,96;GTEx Coexpression,903	DTYMK,TGFB1,UBE2C,TROAP,ABCB4,PLK1,HMGA1,KIF11,YWHAZ,SLC7A1,AURKB,AR,MARCKS,DDX39A,LONP2,KIF2C,SLC27A5
gene_set_query	133	ZNF92	284	ARCHS4 Coexpression,703;Enrichr Queries,137;ReMap ChIP-seq,231;GTEx Coexpression,65	ORC6,DDX39A,TGFB1,SNRPD1,CKS2,MYBL2,KIF2C,KIF11,CENPA,AURKB
gene_set_query	134	DOT1L	286.3	ARCHS4 Coexpression,236;Enrichr Queries,433;GTEx Coexpression,190	ILF3,DDX39A,TGFB1,HMGA1,KIF2C,SLC7A1,AURKB
gene_set_query	135	ARNT	286.4	Literature ChIP-seq,107;ARCHS4 Coexpression,118;Enrichr Queries,637;ReMap ChIP-seq,142;GTEx Coexpression,428	AR,DTYMK,TGFB1,ABCA6,SNRPD1,PLK1,CAT,HMGA1,EFNA5,CENPA,SLC27A2,AURKB
gene_set_query	136	STAT3	288.2	Literature ChIP-seq,35;ARCHS4 Coexpression,250;ENCODE ChIP-seq,104;Enrichr Queries,291;ReMap ChIP-seq,167;GTEx Coexpression,882	TGFB1,ACSL1,ABCA6,AQP9,PIPOX,KIF23,KIF11,YWHAZ,AURKB,CDC20,SCP2,SNRPD1,UBE2S,TACC3,LONP2,KIF2C,MYBL2,SLC27A2
gene_set_query	137	HES1	288.3	ARCHS4 Coexpression,206;Enrichr Queries,290;ReMap ChIP-seq,289;GTEx Coexpression,368	CDC20,MARCKS,ORC6,SNRPD1,CKS2,EFNA5,AURKB
gene_set_query	138	GMEB2	289.7	ARCHS4 Coexpression,184;Enrichr Queries,394;GTEx Coexpression,291	ILF3,TGFB1,PLK1,TACC3,HMGA1,AURKB
gene_set_query	139	PPARA	291.3	ARCHS4 Coexpression,739;Enrichr Queries,99;GTEx Coexpression,36	TGFB1,ACSL1,ABCB4,EPHX2,NR1I2,PIPOX,BAAT,CYP8B1,AURKB,SCP2,CAT,HAO1,MLYCD,ACAA1,AGXT,ALDH8A1,SLC27A5
gene_set_query	140	ZNF598	292.3	ARCHS4 Coexpression,79;Enrichr Queries,236;GTEx Coexpression,562	ILF3,DDX39A,UBE2S,HMGA1,TACC3,MYBL2,SLC7A1,AURKB
gene_set_query	141	NFYC	292.7	ARCHS4 Coexpression,223;Enrichr Queries,152;GTEx Coexpression,503	CDC20,ILF3,TGFB1,AQP9,HMGA1,YWHAZ,AURKB
gene_set_query	142	ZNF691	293	ARCHS4 Coexpression,246;Enrichr Queries,227;GTEx Coexpression,406	CDC20,DTYMK,SNRPD1,HMGA1,CKS2,KIF2C,ACAA1,AURKB
gene_set_query	143	POU5F1	293.6	Literature ChIP-seq,6;ARCHS4 Coexpression,128;Enrichr Queries,85;ReMap ChIP-seq,170;GTEx Coexpression,1079	EPHX2,PLK1,HMGA1,PIPOX,KIF11,YWHAZ,AURKB,TICRR,CDC20,CCNB1,ILF3,CHEK1,TACC3,MYBL2,SLC27A2,SLC27A5
gene_set_query	144	ZNF280C	293.7	ARCHS4 Coexpression,277;Enrichr Queries,374;GTEx Coexpression,230	CCNB2,CHEK1,CKS2,KIF23,KIF11,AURKB
gene_set_query	145	STAT5A	294.7	Literature ChIP-seq,40;ARCHS4 Coexpression,938;ENCODE ChIP-seq,83;Enrichr Queries,364;ReMap ChIP-seq,160;GTEx Coexpression,183	CYP39A1,CCNB2,DDX39A,TGFB1,ACSL1,CAT,AQP9,PIPOX,MYBL2,MLYCD,AURKB
gene_set_query	146	LBX2	295	ARCHS4 Coexpression,130;Enrichr Queries,724;GTEx Coexpression,31	DTYMK,TGFB1,SLC10A1,ABCB4,NR1I2,PIPOX,HSD17B6,BAAT,CYP8B1,AURKB,CYP27A1,SCP2,HAO1,ACAA1,AGXT,ALDH8A1,SLC27A5,SULT2A1
gene_set_query	147	ARID2	297.8	ARCHS4 Coexpression,264;Enrichr Queries,778;ReMap ChIP-seq,22;GTEx Coexpression,127	MARCKS,DDX39A,TGFB1,CKS2,HMGA1,KIF2C,EFNA5,YWHAZ,SLC27A5,AURKB
gene_set_query	148	ZNF8	299.5	ARCHS4 Coexpression,202;Enrichr Queries,397	MARCKS,ORC6,PLK1,ABCA9,AURKB,SLC27A5
gene_set_query	149	DRAP1	301.7	ARCHS4 Coexpression,231;Enrichr Queries,623;GTEx Coexpression,51	CDC20,CCNB2,TGFB1,UBE2S,PLK1,CKS2,HMGA1,KIF2C,AURKB
gene_set_query	150	ZNF257	302.3	ARCHS4 Coexpression,702;Enrichr Queries,156;GTEx Coexpression,49	CCNB1,ORC6,CHEK1,MYBL2,KIF11,GTSE1,CENPA,AURKB,SLC27A5
gene_set_query	151	TBX10	304	ARCHS4 Coexpression,476;Enrichr Queries,293;GTEx Coexpression,143	NR1I2,ACSL5,MYBL2,SLC27A2,AURKB
gene_set_query	152	SPI1	305.7	Literature ChIP-seq,18;ARCHS4 Coexpression,478;ENCODE ChIP-seq,100;Enrichr Queries,814;ReMap ChIP-seq,44;GTEx Coexpression,380	DTYMK,TGFB1,ACSL1,AQP9,HMGA1,KIF23,HSD17B6,YWHAZ,CENPA,AURKB,CCNB2,ORC6,SCP2,UBE2S,CAT,CKS2,LONP2,KIF2C,ACAA1
gene_set_query	153	STAT5B	306	ARCHS4 Coexpression,383;Enrichr Queries,159;ReMap ChIP-seq,217;GTEx Coexpression,465	TGFB1,AQP9,CAT,HMGA1,YWHAZ,SLC27A5,AURKB,RHNO1
gene_set_query	154	ZNF124	309.3	ARCHS4 Coexpression,810;Enrichr Queries,74;GTEx Coexpression,44	TROAP,PLK1,ABCA9,KIF11,AURKB,CDC20,CCNB2,CCNB1,MARCKS,ORC6,CHEK1,CKS2,MYBL2,GTSE1
gene_set_query	155	LIN54	309.5	ARCHS4 Coexpression,280;GTEx Coexpression,339	KIF23,KIF11,RHNO1
gene_set_query	156	TFAP2A	312.8	Literature ChIP-seq,96;ARCHS4 Coexpression,863;ENCODE ChIP-seq,97;Enrichr Queries,129;ReMap ChIP-seq,120;GTEx Coexpression,572	TGFB1,ABCA6,AQP9,HMGA1,ACSL5,KIF23,EFNA5,CENPA,AURKB,TICRR,CDC20,DDX39A,UBE2S,CHEK1,TACC3,CKS2,MYBL2,MLYCD
gene_set_query	157	MEF2A	314.2	Literature ChIP-seq,88;ARCHS4 Coexpression,340;ENCODE ChIP-seq,70;Enrichr Queries,728;ReMap ChIP-seq,125;GTEx Coexpression,534	MARCKS,ILF3,ACSL1,SNRPD1,ABCB4,HMGA1,TACC3,KIF2C,SLC7A1,AURKB
gene_set_query	158	MTF1	315.5	ARCHS4 Coexpression,467;GTEx Coexpression,164	ACSL1,AQP9,TACC3
gene_set_query	159	ZNF90	315.7	ARCHS4 Coexpression,822;Enrichr Queries,13;GTEx Coexpression,112	UBE2C,PLK1,HMGA1,KIF23,KIF11,CENPA,AURKB,TICRR,CDC20,CCNB2,CCNB1,ORC6,SNRPD1,CHEK1,CKS2,TACC3,MYBL2,KIF2C,GTSE1
gene_set_query	160	NFIB	315.8	Literature ChIP-seq,133;ARCHS4 Coexpression,762;Enrichr Queries,299;GTEx Coexpression,69	MARCKS,ABCA6,UBE2S,CKS2,ABCA9,TACC3,HMGA1,EFNA5,AURKB
gene_set_query	161	ZNF492	321.5	ARCHS4 Coexpression,638;GTEx Coexpression,5	DTYMK,UBE2C,PLK1,HMGA1,ABCA9,KIF23,KIF11,CENPA,AURKB,TICRR,CDC20,CCNB2,CCNB1,ORC6,SNRPD1,CHEK1,CKS2,MYBL2,GTSE1,RHNO1
gene_set_query	162	ZBTB7A	321.6	ARCHS4 Coexpression,575;ENCODE ChIP-seq,81;Enrichr Queries,209;ReMap ChIP-seq,255;GTEx Coexpression,488	MARCKS,ILF3,TGFB1,UBE2S,CAT,HMGA1,TACC3,YWHAZ,AURKB
gene_set_query	163	THAP11	322	Literature ChIP-seq,54;ARCHS4 Coexpression,93;Enrichr Queries,247;ReMap ChIP-seq,171;GTEx Coexpression,1045	DTYMK,TGFB1,PLK1,HMGA1,PIPOX,BAAT,AURKB,CDC20,DDX39A,TACC3,MYBL2,KIF2C,PEX11G,GTSE1
gene_set_query	164	FOXA2	322.2	Literature ChIP-seq,99;ARCHS4 Coexpression,455;ENCODE ChIP-seq,69;Enrichr Queries,895;ReMap ChIP-seq,260;GTEx Coexpression,155	ACSL1,SLC10A1,ABCB4,PLK1,ACSL5,BAAT,AURKB,CYP27A1,CYP39A1,MARCKS,ILF3,SCP2,CKS2,ACAA1
gene_set_query	165	HOXB9	323	ARCHS4 Coexpression,29;Enrichr Queries,568;GTEx Coexpression,372	ILF3,UBE2S,PLK1,HMGA1,ACSL5,MYBL2,KIF2C,SLC7A1,AURKB,TICRR
gene_set_query	166	FIGLA	323	ARCHS4 Coexpression,180;Enrichr Queries,461;GTEx Coexpression,328	CCNB1,CHEK1,ABCA9,TACC3,EFNA5,AURKB
gene_set_query	167	NANOGP8	325	ARCHS4 Coexpression,474;GTEx Coexpression,176	CCNB1,TGFB1,CHEK1,LONP2
gene_set_query	168	FOXH1	326	ARCHS4 Coexpression,454;Enrichr Queries,225;GTEx Coexpression,299	SNRPD1,PLK1,HMGA1,ACSL5,MYBL2,AURKB
gene_set_query	169	NFKB1	326.8	ARCHS4 Coexpression,532;Enrichr Queries,145;ReMap ChIP-seq,161;GTEx Coexpression,469	MARCKS,DDX39A,TGFB1,ACSL1,AQP9,HMGA1,YWHAZ,AURKB,SLC27A5
gene_set_query	170	ZBTB39	328.7	ARCHS4 Coexpression,26;Enrichr Queries,780;GTEx Coexpression,180	ILF3,DDX39A,CHEK1,HMGA1,TACC3,KIF2C,MYBL2,KIF11,SLC7A1,AURKB,TICRR
gene_set_query	171	YY1	330.2	Literature ChIP-seq,108;ARCHS4 Coexpression,86;ENCODE ChIP-seq,90;Enrichr Queries,240;ReMap ChIP-seq,226;GTEx Coexpression,1231	HMGA1,KIF11,YWHAZ,AURKB,TICRR,MARCKS,ILF3,ORC6,UBE2S,TACC3,MYBL2,HAO1,GTSE1,SLC27A2
gene_set_query	172	TFAP4	330.5	ARCHS4 Coexpression,328;Enrichr Queries,24;ReMap ChIP-seq,261;GTEx Coexpression,709	UBE2C,PLK1,HMGA1,ABCA9,KIF23,KIF11,SLC7A1,AURKB,CDC20,ILF3,CCNB1,CHEK1,TACC3,CKS2,MYBL2,KIF2C,SLC27A5
gene_set_query	173	RXRA	331.3	Literature ChIP-seq,48;ARCHS4 Coexpression,215;ENCODE ChIP-seq,108;Enrichr Queries,415;ReMap ChIP-seq,140;GTEx Coexpression,1062	TGFB1,ACSL1,AQP9,NR1I2,HMGA1,ABCA9,PIPOX,BAAT,AURKB,CYP27A1,CCNB2,UBE2S,CAT,MLYCD,SLC27A5
gene_set_query	174	KLF9	331.5	ARCHS4 Coexpression,263;Enrichr Queries,692;ReMap ChIP-seq,190;GTEx Coexpression,181	TGFB1,ABCA6,ACSL1,ABCA9,TACC3,ABCA8,AURKB
gene_set_query	175	C11ORF95	332	GTEx Coexpression,332	TACC3
gene_set_query	176	HMX2	332.7	ARCHS4 Coexpression,85;Enrichr Queries,854;GTEx Coexpression,59	ILF3,ORC6,SNRPD1,UBE2S,CHEK1,PLK1,TACC3,MYBL2,KIF11,CENPA,AURKB
gene_set_query	177	CUX1	334.7	Literature ChIP-seq,31;ARCHS4 Coexpression,889;ENCODE ChIP-seq,75;Enrichr Queries,754;ReMap ChIP-seq,136;GTEx Coexpression,123	DTYMK,UBE2C,TROAP,NR1I2,HMGA1,ACSL5,KIF11,ABCA8,YWHAZ,AURKB,TICRR,CCNB2,MARCKS,ORC6,SCP2,UBE2S,CHEK1,CKS2,TACC3,KIF2C,AGXT,ACAA1,SLC27A5
gene_set_query	178	E2F5	334.8	ARCHS4 Coexpression,769;Enrichr Queries,27;ReMap ChIP-seq,14;GTEx Coexpression,529	UBE2C,PLK1,ABCA9,HMGA1,PIPOX,KIF23,KIF11,CENPA,YWHAZ,AURKB,CDC20,CCNB2,CCNB1,MARCKS,UBE2S,CHEK1,CKS2,KIF2C,MYBL2,PEX11G
gene_set_query	179	ZNF629	335.3	ARCHS4 Coexpression,481;Enrichr Queries,184;GTEx Coexpression,341	MARCKS,ILF3,HMGA1,MLYCD,SLC7A1,AURKB,TICRR
gene_set_query	180	MYCN	336	Literature ChIP-seq,5;ARCHS4 Coexpression,256;Enrichr Queries,64;ReMap ChIP-seq,43;GTEx Coexpression,1312	TGFB1,UBE2C,TROAP,HMGA1,KIF11,AURKB,CDC20,CYP39A1,CCNB2,CCNB1,MARCKS,ILF3,DDX39A,UBE2S,CHEK1,TACC3,MYBL2,SLC27A5
gene_set_query	181	ERF	339	ARCHS4 Coexpression,509;Enrichr Queries,138;GTEx Coexpression,370	MARCKS,ILF3,TGFB1,HMGA1,MYBL2,SLC7A1,AURKB
gene_set_query	182	HHEX	339.3	ARCHS4 Coexpression,99;Enrichr Queries,707;ReMap ChIP-seq,193;GTEx Coexpression,358	TGFB1,ACSL1,CAT,TACC3,LONP2,KIF11,ACAA1,CYP8B1,AURKB
gene_set_query	183	ARNTL2	341.7	ARCHS4 Coexpression,895;Enrichr Queries,36;GTEx Coexpression,94	UBE2C,PLK1,HMGA1,KIF23,KIF11,SLC7A1,AURKB,TICRR,CDC20,CCNB2,CCNB1,CKS2,MYBL2,KIF2C
gene_set_query	184	ZNF850	343	ARCHS4 Coexpression,303;GTEx Coexpression,383	ORC6,CHEK1,SLC27A5
gene_set_query	185	NR5A1	345.3	ARCHS4 Coexpression,676;Enrichr Queries,121;GTEx Coexpression,239	ILF3,HMGA1,MYBL2,YWHAZ,AURKB,SULT2A1
gene_set_query	186	HOXA13	347.3	ARCHS4 Coexpression,235;Enrichr Queries,498;GTEx Coexpression,309	AR,KIF11,SLC7A1,AURKB,TICRR
gene_set_query	187	FOXD3	347.3	ARCHS4 Coexpression,51;Enrichr Queries,880;GTEx Coexpression,111	ILF3,ABCA6,SNRPD1,PLK1,ABCA9,CKS2,HMGA1,MYBL2,ABCA8,AURKB
gene_set_query	188	SRF	347.5	Literature ChIP-seq,53;ARCHS4 Coexpression,244;ENCODE ChIP-seq,31;Enrichr Queries,201;ReMap ChIP-seq,84;GTEx Coexpression,1472	DTYMK,TROAP,HMGA1,YWHAZ,SLC7A1,AURKB,CCNB2,ILF3,DDX39A,SNRPD1,UBE2S,CHEK1,CKS2,TACC3,KIF2C,ACAA1,SLC27A5
gene_set_query	189	MNX1	348.3	Literature ChIP-seq,66;ARCHS4 Coexpression,124;Enrichr Queries,477;GTEx Coexpression,726	MARCKS,UBE2S,ACSL1,PLK1,HMGA1,PIPOX,MYBL2,EFNA5,SLC7A1,YWHAZ,AURKB,TICRR
gene_set_query	190	PRDM13	349	ARCHS4 Coexpression,452;Enrichr Queries,537;GTEx Coexpression,58	ORC6,SNRPD1,UBE2S,CHEK1,MYBL2,KIF11,EFNA5,CENPA,AURKB
gene_set_query	191	ZNF117	349	ARCHS4 Coexpression,445;Enrichr Queries,473;GTEx Coexpression,129	ACSL1,UBE2S,CAT,ABCA9,AURKB
gene_set_query	192	YBX1	349.3	ARCHS4 Coexpression,59;Enrichr Queries,767;GTEx Coexpression,222	ILF3,UBE2S,HMGA1,KIF2C,MYBL2,YWHAZ,SLC7A1
gene_set_query	193	ATOH1	350.3	ARCHS4 Coexpression,228;Enrichr Queries,488;GTEx Coexpression,335	NR1I2,HMGA1,ACSL5,EFNA5,AURKB
gene_set_query	194	ISX	354	ARCHS4 Coexpression,254;Enrichr Queries,441;GTEx Coexpression,367	EPHX2,NR1I2,ACSL5,AGXT,AURKB
gene_set_query	195	FOXP3	355.3	Literature ChIP-seq,86;ARCHS4 Coexpression,667;Enrichr Queries,162;GTEx Coexpression,506	CCNB1,ILF3,TGFB1,SCP2,PLK1,HMGA1,TACC3,LONP2,MYBL2,AURKB
gene_set_query	196	MTERF3	356	ARCHS4 Coexpression,203;GTEx Coexpression,509	CCNB1,SNRPD1,CHEK1,MLYCD
gene_set_query	197	MAZ	356.2	ARCHS4 Coexpression,131;ENCODE ChIP-seq,37;Enrichr Queries,45;ReMap ChIP-seq,225;GTEx Coexpression,1343	DTYMK,TGFB1,UBE2C,ACSL1,EPHX2,PLK1,HMGA1,YWHAZ,SLC7A1,AURKB,CDC20,ILF3,DDX39A,UBE2S,CKS2,MYBL2,KIF2C,MLYCD
gene_set_query	198	E2F6	356.4	ARCHS4 Coexpression,189;ENCODE ChIP-seq,8;Enrichr Queries,84;ReMap ChIP-seq,24;GTEx Coexpression,1477	DTYMK,TGFB1,ABCB4,PLK1,HMGA1,KIF23,CENPA,YWHAZ,AURKB,CDC20,CCNB1,ILF3,DDX39A,SCP2,UBE2S,SNRPD1,CKS2,MYBL2,KIF2C,SLC27A5
gene_set_query	199	TEAD2	356.8	ARCHS4 Coexpression,459;Enrichr Queries,58;ReMap ChIP-seq,114;GTEx Coexpression,796	UBE2C,PLK1,HMGA1,KIF23,CENPA,AURKB,CDC20,CCNB2,CCNB1,ILF3,MYBL2,KIF2C,SULT2A1
gene_set_query	200	BCL11A	357	ARCHS4 Coexpression,757;ENCODE ChIP-seq,71;Enrichr Queries,329;ReMap ChIP-seq,204;GTEx Coexpression,424	MARCKS,TGFB1,ACSL1,HMGA1,PIPOX,EFNA5,YWHAZ,AURKB
gene_set_query	201	SETDB1	357.7	Literature ChIP-seq,42;ARCHS4 Coexpression,542;ENCODE ChIP-seq,26;Enrichr Queries,71;ReMap ChIP-seq,275;GTEx Coexpression,1190	ABCB4,KIF11,ABCB11,CENPA,AURKB,CDC20,CCNB2,CCNB1,SNRPD1,MYBL2,UBE2C,ABCA6,EPHX2,PLK1,HMGA1,ABCA9,KIF23,BAAT,TICRR,ILF3,UBE2S,CAT,TACC3,CKS2,KIF2C
gene_set_query	202	ZNF749	357.7	ARCHS4 Coexpression,649;Enrichr Queries,141;GTEx Coexpression,283	DTYMK,SNRPD1,CKS2,KIF23,SLC7A1,AURKB,TICRR
gene_set_query	203	TCF7	358.8	Literature ChIP-seq,147;ARCHS4 Coexpression,700;Enrichr Queries,414;ReMap ChIP-seq,124;GTEx Coexpression,409	TGFB1,SNRPD1,HMGA1,KIF2C,SLC27A5,AURKB
gene_set_query	204	HSF1	359.4	Literature ChIP-seq,121;ARCHS4 Coexpression,802;ENCODE ChIP-seq,51;ReMap ChIP-seq,137;GTEx Coexpression,686	PLK1,TACC3,CKS2,HMGA1,PEX11G,CENPA,SLC27A5,AURKB
gene_set_query	205	ZNF300	359.7	ARCHS4 Coexpression,730;Enrichr Queries,97;GTEx Coexpression,252	CDC20,ILF3,MARCKS,UBE2C,PLK1,MYBL2,KIF11,AURKB
gene_set_query	206	NFYB	360.8	ARCHS4 Coexpression,101;ENCODE ChIP-seq,6;Enrichr Queries,89;ReMap ChIP-seq,52;GTEx Coexpression,1556	DTYMK,ABCA6,UBE2C,TROAP,PLK1,HMGA1,KIF23,KIF11,YWHAZ,AURKB,CDC20,CYP39A1,CCNB2,CCNB1,UBE2S,SNRPD1,TACC3,CKS2,MYBL2,MLYCD,ACAA1,PEX11G,GTSE1
gene_set_query	207	ZNF280B	361	ARCHS4 Coexpression,565;Enrichr Queries,157	CDC20,CCNB1,PLK1,MYBL2,EFNA5,AURKB
gene_set_query	208	ESR1	362	Literature ChIP-seq,27;ARCHS4 Coexpression,1359;ENCODE ChIP-seq,66;Enrichr Queries,315;ReMap ChIP-seq,188;GTEx Coexpression,217	TGFB1,PIPOX,ACSL5,ABCB11,CENPA,YWHAZ,SLC7A1,AURKB,CYP27A1,AR,CKS2,LONP2,AGXT
gene_set_query	209	ZFP69B	362	ARCHS4 Coexpression,685;GTEx Coexpression,39	CCNB1,ORC6,SNRPD1,UBE2C,CHEK1,HMGA1,KIF23,KIF2C,KIF11,GTSE1,CENPA,AURKB
gene_set_query	210	FOXP1	362.8	Literature ChIP-seq,62;ARCHS4 Coexpression,706;Enrichr Queries,369;ReMap ChIP-seq,11;GTEx Coexpression,666	ABCB4,EPHX2,HMGA1,ABCA9,KIF11,EFNA5,YWHAZ,CENPA,AURKB,MARCKS,DDX39A,SNRPD1,CHEK1,TACC3,CKS2,KIF2C,ACAA1,PEX11G,SLC27A5,SULT2A1
gene_set_query	211	CEBPZ	363.4	ARCHS4 Coexpression,458;ENCODE ChIP-seq,82;Enrichr Queries,226;ReMap ChIP-seq,31;GTEx Coexpression,1020	CDC20,CCNB1,DDX39A,UBE2C,SNRPD1,TROAP,CHEK1,KIF2C,ACAA1,CENPA,SLC27A5,AURKB
gene_set_query	212	CSRNP1	365.5	ARCHS4 Coexpression,207;GTEx Coexpression,524	TGFB1,ACSL1,AQP9
gene_set_query	213	KDM5B	366	Literature ChIP-seq,26;ARCHS4 Coexpression,1243;ENCODE ChIP-seq,47;ReMap ChIP-seq,162;GTEx Coexpression,352	KIF11,EFNA5,ABCB11,SLC7A1,AURKB,CCNB2,CCNB1,ORC6,SNRPD1,CHEK1,MLYCD,ACAA1,TGFB1,ACSL1,SLC10A1,HMGA1,PIPOX,KIF23,YWHAZ,ILF3,MARCKS,DDX39A,UBE2S,TACC3,CKS2,KIF2C
gene_set_query	214	IRX6	366.3	ARCHS4 Coexpression,268;Enrichr Queries,486;GTEx Coexpression,345	ACSL1,ABCA8,EFNA5,AURKB
gene_set_query	215	STAT1	366.5	Literature ChIP-seq,141;ARCHS4 Coexpression,1246;ENCODE ChIP-seq,77;Enrichr Queries,583;ReMap ChIP-seq,97;GTEx Coexpression,55	DTYMK,TGFB1,ACSL1,TROAP,HMGA1,KIF23,KIF11,CENPA,AURKB,CCNB2,MARCKS,ORC6,DDX39A,SNRPD1,CHEK1,LONP2,MYBL2,ACAA1
gene_set_query	216	ZNF788P	367.7	ARCHS4 Coexpression,188;Enrichr Queries,22;GTEx Coexpression,893	UBE2C,PLK1,ABCA9,KIF23,KIF11,CENPA,AURKB,TICRR,CDC20,CCNB2,CCNB1,ORC6,CHEK1,CKS2,MYBL2,KIF2C,SLC27A5
gene_set_query	217	MBD4	367.8	ARCHS4 Coexpression,1367;ENCODE ChIP-seq,68;Enrichr Queries,47;ReMap ChIP-seq,62;GTEx Coexpression,295	SLC10A1,AQP9,PLK1,ACSL5,PIPOX,KIF23,KIF11,BAAT,YWHAZ,AURKB,CDC20,CCNB2,MARCKS,CCNB1,ORC6,DDX39A,SNRPD1,CKS2,LONP2,KIF2C
gene_set_query	218	ZNF789	369	ARCHS4 Coexpression,786;Enrichr Queries,59;GTEx Coexpression,262	CDC20,ILF3,CCNB1,ORC6,TROAP,PLK1,ABCA9,MYBL2,KIF11,AURKB,TICRR
gene_set_query	219	RFX5	369.4	ARCHS4 Coexpression,957;ENCODE ChIP-seq,29;Enrichr Queries,161;ReMap ChIP-seq,218;GTEx Coexpression,482	TROAP,PLK1,HMGA1,YWHAZ,AURKB,CDC20,CCNB2,CCNB1,MARCKS,ILF3,DDX39A,SNRPD1,CAT,CKS2,MYBL2,KIF2C,GTSE1
gene_set_query	220	ALX4	370	ARCHS4 Coexpression,312;Enrichr Queries,490;GTEx Coexpression,308	ILF3,MYBL2,EFNA5,AURKB
gene_set_query	221	ZIC5	370	ARCHS4 Coexpression,69;Enrichr Queries,127;GTEx Coexpression,914	CDC20,ILF3,SNRPD1,CHEK1,CKS2,PIPOX,MYBL2,EFNA5,AURKB,TICRR
gene_set_query	222	ZNF366	371.7	ARCHS4 Coexpression,491;Enrichr Queries,523;GTEx Coexpression,101	ABCA6,ABCA9,ABCA8,SLC27A2,AURKB,RHNO1
gene_set_query	223	TCF7L2	374.2	Literature ChIP-seq,140;ARCHS4 Coexpression,282;ENCODE ChIP-seq,22;Enrichr Queries,306;ReMap ChIP-seq,93;GTEx Coexpression,1402	NR1I2,HMGA1,PIPOX,ACSL5,EFNA5,BAAT,CENPA,AURKB,CDC20,CYP27A1,MARCKS,SULT2A1
gene_set_query	224	GABPA	374.8	Literature ChIP-seq,23;ARCHS4 Coexpression,653;ENCODE ChIP-seq,49;Enrichr Queries,1176;ReMap ChIP-seq,223;GTEx Coexpression,125	DTYMK,ABCA6,ABCA9,HMGA1,KIF23,KIF11,EFNA5,YWHAZ,AURKB,CDC20,CYP39A1,MARCKS,DDX39A,SNRPD1,CAT,TACC3,MLYCD,ALDH8A1,GTSE1,SLC27A5
gene_set_query	225	IRF1	375.3	Literature ChIP-seq,116;ARCHS4 Coexpression,470;ENCODE ChIP-seq,72;Enrichr Queries,892;ReMap ChIP-seq,251;GTEx Coexpression,451	DTYMK,TGFB1,TROAP,EPHX2,AQP9,HMGA1,ACSL5,KIF23,KIF11,YWHAZ,AURKB,CCNB2,DDX39A,ORC6,LONP2,MYBL2,KIF2C,GTSE1
gene_set_query	226	FOXK2	376.3	ARCHS4 Coexpression,84;Enrichr Queries,163;ReMap ChIP-seq,202;GTEx Coexpression,1056	ILF3,TGFB1,UBE2S,HMGA1,MYBL2,CENPA,YWHAZ,SLC7A1,AURKB,TICRR
gene_set_query	227	HBP1	377	ARCHS4 Coexpression,125;Enrichr Queries,318;ReMap ChIP-seq,87;GTEx Coexpression,978	CDC20,MARCKS,ILF3,TGFB1,UBE2S,CAT,AQP9,TACC3,MYBL2,SLC27A5,AURKB
gene_set_query	228	LIN28B	377.7	ARCHS4 Coexpression,49;Enrichr Queries,56;GTEx Coexpression,1028	UBE2C,PLK1,HMGA1,KIF11,EFNA5,AURKB,TICRR,CCNB1,MARCKS,ILF3,SNRPD1,CHEK1,MYBL2
gene_set_query	229	FOXD1	378	ARCHS4 Coexpression,679;GTEx Coexpression,77	DTYMK,UBE2S,CHEK1,HMGA1,KIF23
gene_set_query	230	NRF1	378.2	ARCHS4 Coexpression,709;ENCODE ChIP-seq,28;Enrichr Queries,55;ReMap ChIP-seq,99;GTEx Coexpression,1000	DTYMK,HMGA1,KIF23,KIF11,YWHAZ,CENPA,AURKB,CDC20,CCNB2,ILF3,CCNB1,DDX39A,SCP2,SNRPD1,UBE2S,TACC3,MYBL2,KIF2C,PEX11G,GTSE1,SLC27A2,SLC27A5
gene_set_query	231	CREB3L4	378.7	ARCHS4 Coexpression,888;Enrichr Queries,46;GTEx Coexpression,202	UBE2C,EPHX2,PLK1,CENPA,AURKB,CDC20,AR,CCNB2,CCNB1,CHEK1,CKS2,MYBL2
gene_set_query	232	EBF1	379.4	ARCHS4 Coexpression,838;ENCODE ChIP-seq,101;Enrichr Queries,551;ReMap ChIP-seq,281;GTEx Coexpression,126	CCNB1,TGFB1,ABCA6,UBE2C,ABCA9,HMGA1,LONP2,EFNA5,ACAA1,AURKB
gene_set_query	233	FOXO1	379.4	Literature ChIP-seq,65;ARCHS4 Coexpression,337;Enrichr Queries,1081;ReMap ChIP-seq,244;GTEx Coexpression,170	SCP2,ABCA6,UBE2S,ABCA9,KIF23,AGXT,AURKB
gene_set_query	234	ZNF785	381.5	ARCHS4 Coexpression,152;GTEx Coexpression,611	ORC6,ABCA9,SLC27A5
gene_set_query	235	PCGF6	382.7	ARCHS4 Coexpression,195;Enrichr Queries,31;GTEx Coexpression,922	DTYMK,UBE2C,PLK1,HMGA1,KIF23,KIF11,SLC7A1,CENPA,AURKB,CDC20,CCNB1,ORC6,CHEK1,CKS2,MYBL2
gene_set_query	236	MXD1	383.7	ARCHS4 Coexpression,345;Enrichr Queries,368;GTEx Coexpression,438	MARCKS,TGFB1,ACSL1,AQP9,AURKB
gene_set_query	237	DLX4	383.8	Literature ChIP-seq,164;ARCHS4 Coexpression,50;Enrichr Queries,902;GTEx Coexpression,419	CDC20,UBE2S,PLK1,MYBL2,KIF2C,EFNA5,AURKB,TICRR
gene_set_query	238	ZNF263	384.8	Literature ChIP-seq,158;ARCHS4 Coexpression,401;ENCODE ChIP-seq,88;Enrichr Queries,232;ReMap ChIP-seq,278;GTEx Coexpression,1152	DTYMK,TROAP,HMGA1,KIF11,AURKB,CYP39A1,ILF3,SNRPD1,TACC3,CKS2,MYBL2,GTSE1
gene_set_query	239	TCFL5	385	ARCHS4 Coexpression,88;Enrichr Queries,82;GTEx Coexpression,985	CDC20,CCNB2,CCNB1,UBE2C,UBE2S,MYBL2,KIF2C,SLC27A2,AURKB,TICRR
gene_set_query	240	ZNF813	385.5	ARCHS4 Coexpression,605;GTEx Coexpression,166	CHEK1,ABCA9,CENPA
gene_set_query	241	MEOX2	386.7	ARCHS4 Coexpression,550;Enrichr Queries,505;GTEx Coexpression,105	ABCA6,ABCA9,ABCA8,AURKB
gene_set_query	242	ZNF551	387.3	ARCHS4 Coexpression,759;Enrichr Queries,81;GTEx Coexpression,322	CDC20,CCNB2,ILF3,CCNB1,PLK1,CHEK1,CKS2,KIF11,AURKB
gene_set_query	243	CREB5	387.3	ARCHS4 Coexpression,219;Enrichr Queries,549;GTEx Coexpression,394	MARCKS,ACSL1,AQP9,AURKB
gene_set_query	244	HOXA11	388.3	ARCHS4 Coexpression,247;Enrichr Queries,708;GTEx Coexpression,210	AR,UBE2S,PLK1,MYBL2,SLC7A1,AURKB
gene_set_query	245	CTCFL	388.4	ARCHS4 Coexpression,308;ENCODE ChIP-seq,95;Enrichr Queries,122;ReMap ChIP-seq,200;GTEx Coexpression,1217	TGFB1,ACSL1,ABCB4,HMGA1,ABCA9,KIF11,AURKB,CCNB1,SNRPD1,CHEK1,TACC3,MYBL2,SLC27A2,SLC27A5
gene_set_query	246	PRDM4	390	ARCHS4 Coexpression,582;Enrichr Queries,207;GTEx Coexpression,381	HMGA1,SLC7A1,YWHAZ,AURKB
gene_set_query	247	IKZF1	390	Literature ChIP-seq,153;ARCHS4 Coexpression,651;ENCODE ChIP-seq,40;Enrichr Queries,798;ReMap ChIP-seq,263;GTEx Coexpression,435	TGFB1,ACSL1,ABCB4,NR1I2,EFNA5,AURKB,CDC20,ILF3,MARCKS,CHEK1,KIF2C,PEX11G,SLC27A2
gene_set_query	248	TBP	390.6	Literature ChIP-seq,87;ARCHS4 Coexpression,1477;ENCODE ChIP-seq,39;ReMap ChIP-seq,164;GTEx Coexpression,186	DTYMK,TROAP,HMGA1,ACSL5,KIF23,YWHAZ,AURKB,CCNB2,CCNB1,DDX39A,ORC6,LONP2,KIF2C,GTSE1,SLC27A5
gene_set_query	249	DACH1	391.3	Literature ChIP-seq,101;ARCHS4 Coexpression,521;Enrichr Queries,552	MARCKS,ILF3,SNRPD1,CKS2,HMGA1,KIF11,EFNA5,AURKB
gene_set_query	250	ZNF266	391.3	ARCHS4 Coexpression,591;Enrichr Queries,168;GTEx Coexpression,415	ILF3,ACSL1,ABCA9,ACSL5,KIF11,AURKB
gene_set_query	251	ZNF736	391.5	ARCHS4 Coexpression,534;GTEx Coexpression,249	ILF3,ABCA6,ABCA9
gene_set_query	252	DMRTA2	392	ARCHS4 Coexpression,461;Enrichr Queries,517;GTEx Coexpression,198	MARCKS,ORC6,EFNA5,SLC7A1,AURKB,TICRR
gene_set_query	253	ZBTB33	393.8	ARCHS4 Coexpression,752;ENCODE ChIP-seq,80;Enrichr Queries,665;ReMap ChIP-seq,130;GTEx Coexpression,342	CDC20,ILF3,DTYMK,TGFB1,TROAP,LONP2,KIF2C,KIF11,YWHAZ,AURKB,RHNO1
gene_set_query	254	FOSL2	396.4	ARCHS4 Coexpression,425;ENCODE ChIP-seq,103;Enrichr Queries,730;ReMap ChIP-seq,149;GTEx Coexpression,575	MARCKS,TGFB1,ACSL1,HMGA1,CENPA,AURKB,SLC27A5
gene_set_query	255	SALL1	397	Literature ChIP-seq,157;ARCHS4 Coexpression,484;Enrichr Queries,296;GTEx Coexpression,651	ILF3,MARCKS,PIPOX,EFNA5,AURKB
gene_set_query	256	CDC5L	397.7	ARCHS4 Coexpression,92;Enrichr Queries,332;GTEx Coexpression,769	ILF3,CHEK1,KIF23,KIF11,YWHAZ,AURKB,TICRR
gene_set_query	257	BACH1	398.8	Literature ChIP-seq,19;ARCHS4 Coexpression,369;ENCODE ChIP-seq,85;Enrichr Queries,313;ReMap ChIP-seq,153;GTEx Coexpression,1454	TGFB1,ACSL1,ABCA6,ABCB4,PLK1,AQP9,HMGA1,KIF11,ABCA8,ABCB11,CENPA,AURKB,AR,MARCKS,DDX39A,CHEK1,TACC3,KIF2C,PEX11G,SULT2A1
gene_set_query	258	KDM2B	399.5	ARCHS4 Coexpression,76;GTEx Coexpression,723	ILF3,SCP2,HMGA1,TACC3,TICRR
gene_set_query	259	CUX2	401	ARCHS4 Coexpression,75;Enrichr Queries,1093;GTEx Coexpression,35	SLC10A1,PIPOX,HSD17B6,BAAT,ABCB11,CYP8B1,AURKB,SCP2,HAO1,ACAA1,AGXT,ALDH8A1,SLC27A5
gene_set_query	260	FOXN4	402	ARCHS4 Coexpression,8;Enrichr Queries,108;GTEx Coexpression,1090	UBE2C,TROAP,PLK1,KIF23,KIF11,EFNA5,AURKB,CDC20,CCNB2,CCNB1,CKS2,MYBL2,KIF2C,SLC27A2,GTSE1,RHNO1
gene_set_query	261	AKAP8L	403.3	ARCHS4 Coexpression,751;Enrichr Queries,233;GTEx Coexpression,226	ILF3,CAT,YWHAZ,AURKB
gene_set_query	262	ZNF586	404	ARCHS4 Coexpression,607;Enrichr Queries,113;GTEx Coexpression,492	CDC20,AQP9,CHEK1,CAT,PLK1,MYBL2,AURKB
gene_set_query	263	ZNF267	404.7	ARCHS4 Coexpression,371;Enrichr Queries,303;GTEx Coexpression,540	MARCKS,ACSL1,AQP9,CKS2,AURKB
gene_set_query	264	RORC	405	ARCHS4 Coexpression,41;Enrichr Queries,212;GTEx Coexpression,962	ACSL1,EPHX2,NR1I2,HAO1,HSD17B6,AGXT,BAAT,ABCB11,CYP8B1,AURKB
gene_set_query	265	L3MBTL4	405.5	ARCHS4 Coexpression,291;GTEx Coexpression,520	CYP39A1,ABCA9,SLC27A5
gene_set_query	266	L3MBTL3	405.5	ARCHS4 Coexpression,554;GTEx Coexpression,257	MARCKS,TGFB1
gene_set_query	267	FOXK1	405.8	ARCHS4 Coexpression,1015;Enrichr Queries,242;ReMap ChIP-seq,184;GTEx Coexpression,182	ILF3,MARCKS,CAT,HMGA1,ACAA1,SLC7A1,SLC27A5,AURKB
gene_set_query	268	SOX15	406	ARCHS4 Coexpression,57;Enrichr Queries,195;GTEx Coexpression,966	CDC20,CCNB1,UBE2C,PLK1,HMGA1,MYBL2,CENPA,AURKB
gene_set_query	269	PPARD	406.5	Literature ChIP-seq,14;ARCHS4 Coexpression,787;Enrichr Queries,189;GTEx Coexpression,636	TGFB1,CAT,HMGA1,ACSL5,MYBL2,MLYCD,ABCB11,SLC7A1,AURKB
gene_set_query	270	SIM2	407	ARCHS4 Coexpression,363;Enrichr Queries,667;GTEx Coexpression,191	AR,ABCA9,EFNA5,SLC7A1,AURKB,TICRR
gene_set_query	271	ETS2	407.3	Literature ChIP-seq,150;ARCHS4 Coexpression,257;Enrichr Queries,321;GTEx Coexpression,901	MARCKS,ACSL1,NR1I2,ACSL5,AURKB
gene_set_query	272	BAZ2A	407.7	ARCHS4 Coexpression,834;Enrichr Queries,245;GTEx Coexpression,144	ILF3,DDX39A,HMGA1,YWHAZ,AURKB
gene_set_query	273	CDX2	407.8	Literature ChIP-seq,109;ARCHS4 Coexpression,489;Enrichr Queries,907;ReMap ChIP-seq,158;GTEx Coexpression,376	NR1I2,AQP9,ACSL5,ABCB11,YWHAZ,AURKB
gene_set_query	274	ELF1	409.2	Literature ChIP-seq,74;ARCHS4 Coexpression,1091;ENCODE ChIP-seq,54;ReMap ChIP-seq,85;GTEx Coexpression,742	DTYMK,TGFB1,TROAP,KIF23,KIF11,YWHAZ,AURKB,DDX39A,TACC3,LONP2,KIF2C,GTSE1,SLC27A5
gene_set_query	275	IRF2	409.3	ARCHS4 Coexpression,526;Enrichr Queries,386;ReMap ChIP-seq,209;GTEx Coexpression,516	MARCKS,TGFB1,ACSL1,AQP9,HMGA1,TACC3,AURKB
gene_set_query	276	ZBED2	409.7	ARCHS4 Coexpression,412;Enrichr Queries,57;GTEx Coexpression,760	CDC20,CCNB1,DDX39A,ACSL1,UBE2C,CKS2,KIF2C,KIF11,SLC27A2,SLC7A1,AURKB
gene_set_query	277	SP2	410.2	ARCHS4 Coexpression,918;ENCODE ChIP-seq,17;Enrichr Queries,668;ReMap ChIP-seq,86;GTEx Coexpression,362	TGFB1,TROAP,HMGA1,YWHAZ,CENPA,AURKB,CDC20,CCNB2,DDX39A,ORC6,SNRPD1,UBE2S,CHEK1,CAT,TACC3,ACAA1
gene_set_query	278	MAX	410.6	ARCHS4 Coexpression,623;ENCODE ChIP-seq,13;Enrichr Queries,382;ReMap ChIP-seq,156;GTEx Coexpression,879	DTYMK,TGFB1,UBE2C,PLK1,HMGA1,KIF23,YWHAZ,CENPA,AURKB,CDC20,ILF3,CCNB1,ORC6,SNRPD1,UBE2S,TACC3,MYBL2
gene_set_query	279	ZNF217	410.7	Literature ChIP-seq,91;ARCHS4 Coexpression,1173;ENCODE ChIP-seq,106;Enrichr Queries,175;ReMap ChIP-seq,174;GTEx Coexpression,745	MARCKS,PLK1,CKS2,KIF23,ABCA8,AGXT,EFNA5,SLC27A2,YWHAZ,AURKB
gene_set_query	280	ZNF142	410.7	ARCHS4 Coexpression,65;Enrichr Queries,146;GTEx Coexpression,1021	ILF3,PLK1,TACC3,MYBL2,SLC7A1,AURKB,TICRR
gene_set_query	281	TRAFD1	411	ARCHS4 Coexpression,398;Enrichr Queries,417;GTEx Coexpression,418	MARCKS,TGFB1,ACSL1,AQP9,TACC3,AURKB
gene_set_query	282	POU2F1	411	ARCHS4 Coexpression,533;Enrichr Queries,423;ReMap ChIP-seq,21;GTEx Coexpression,667	CCNB2,UBE2S,CHEK1,CKS2,HMGA1,TACC3,PIPOX,KIF2C,YWHAZ,AURKB,TICRR
gene_set_query	283	NFX1	412	ARCHS4 Coexpression,169;Enrichr Queries,439;GTEx Coexpression,628	ILF3,ABCA6,ABCA9,YWHAZ,AURKB,SLC27A5
gene_set_query	284	KLF1	413	Literature ChIP-seq,8;ARCHS4 Coexpression,921;Enrichr Queries,90;ReMap ChIP-seq,151;GTEx Coexpression,895	DTYMK,TGFB1,UBE2C,HMGA1,ACSL5,CENPA,SLC7A1,AURKB,CDC20,CCNB2,CCNB1,ILF3,DDX39A,SNRPD1,CAT,TACC3,MYBL2,SLC27A5
gene_set_query	285	USF1	413.2	ARCHS4 Coexpression,847;ENCODE ChIP-seq,45;Enrichr Queries,400;ReMap ChIP-seq,10;GTEx Coexpression,764	DTYMK,TGFB1,UBE2C,EPHX2,PLK1,HMGA1,CENPA,AURKB,CYP27A1,CCNB2,ILF3,CCNB1,DDX39A,UBE2S,TACC3,MYBL2,PEX11G,SLC27A5
gene_set_query	286	ATF2	413.4	ARCHS4 Coexpression,339;ENCODE ChIP-seq,87;Enrichr Queries,795;ReMap ChIP-seq,152;GTEx Coexpression,694	CDC20,ILF3,MARCKS,DDX39A,UBE2S,HMGA1,KIF2C,YWHAZ,GTSE1,AURKB
gene_set_query	287	NR3C1	414.3	Literature ChIP-seq,113;ARCHS4 Coexpression,860;ENCODE ChIP-seq,84;Enrichr Queries,124;ReMap ChIP-seq,213;GTEx Coexpression,1092	MARCKS,TGFB1,ACSL1,CAT,AQP9,TACC3,ACSL5,KIF2C,HAO1,EFNA5,YWHAZ,AURKB
gene_set_query	288	ZNF787	414.7	ARCHS4 Coexpression,522;Enrichr Queries,311;GTEx Coexpression,411	TGFB1,UBE2S,AQP9,HMGA1,AURKB
gene_set_query	289	ZNF587B	415	ARCHS4 Coexpression,275;GTEx Coexpression,555	CHEK1,MLYCD
gene_set_query	290	ZNF670	416	ARCHS4 Coexpression,804;Enrichr Queries,28	DTYMK,UBE2C,PLK1,KIF23,KIF11,CENPA,AURKB,CDC20,CCNB2,CCNB1,ORC6,CHEK1,CKS2,MYBL2,KIF2C
gene_set_query	291	ZBTB48	417.3	ARCHS4 Coexpression,496;Enrichr Queries,443;GTEx Coexpression,313	CDC20,TGFB1,AQP9,TACC3,AURKB
gene_set_query	292	ZNF512B	418	ARCHS4 Coexpression,688;Enrichr Queries,430;GTEx Coexpression,136	ILF3,PLK1,LONP2,KIF11,AURKB
gene_set_query	293	RUNX3	418.2	ARCHS4 Coexpression,519;ENCODE ChIP-seq,91;Enrichr Queries,820;ReMap ChIP-seq,187;GTEx Coexpression,474	CDC20,CCNB1,TGFB1,ACSL1,UBE2C,KIF11,MLYCD,YWHAZ,AURKB
gene_set_query	294	MITF	419	Literature ChIP-seq,78;ARCHS4 Coexpression,655;Enrichr Queries,527;ReMap ChIP-seq,37;GTEx Coexpression,798	DTYMK,ACSL1,SLC10A1,NR1I2,PLK1,HMGA1,EFNA5,SLC7A1,CENPA,AURKB,CYP27A1,ILF3,CCNB1,DDX39A,ORC6,CAT,CKS2,TACC3,LONP2,MYBL2,SLC27A5
gene_set_query	295	CREB1	420.2	Literature ChIP-seq,43;ARCHS4 Coexpression,585;ENCODE ChIP-seq,24;Enrichr Queries,202;ReMap ChIP-seq,267;GTEx Coexpression,1400	DTYMK,UBE2C,TROAP,YWHAZ,CENPA,AURKB,MARCKS,ILF3,DDX39A,ORC6,CAT,TACC3,CKS2,KIF2C,PEX11G,GTSE1,SLC27A5
gene_set_query	296	ZNF732	420.5	ARCHS4 Coexpression,139;GTEx Coexpression,702	CCNB2,CCNB1,CHEK1,KIF23
gene_set_query	297	ZNF717	421.3	ARCHS4 Coexpression,286;Enrichr Queries,464;GTEx Coexpression,514	ABCA6,CHEK1,ABCA9,EFNA5,AURKB
gene_set_query	298	TERF1	422	ARCHS4 Coexpression,224;Enrichr Queries,23;ReMap ChIP-seq,127;GTEx Coexpression,1314	ACSL1,UBE2C,PLK1,HMGA1,KIF23,KIF11,YWHAZ,AURKB,CDC20,CCNB2,ILF3,CCNB1,DDX39A,SNRPD1,CHEK1,CKS2,TACC3,MYBL2,KIF2C
gene_set_query	299	CEBPG	422.3	ARCHS4 Coexpression,537;Enrichr Queries,120;ReMap ChIP-seq,227;GTEx Coexpression,805	CKS2,HMGA1,ABCA9,ABCA8,KIF11,SLC7A1,AURKB
gene_set_query	300	NKRF	422.3	ARCHS4 Coexpression,58;Enrichr Queries,356;GTEx Coexpression,853	ILF3,MYBL2,KIF2C,KIF11,SLC7A1,AURKB,TICRR
gene_set_query	301	ZNF354A	424.3	ARCHS4 Coexpression,576;Enrichr Queries,266;GTEx Coexpression,431	AQP9,CKS2,SLC27A2,YWHAZ,AURKB
gene_set_query	302	NR2F2	425.2	ARCHS4 Coexpression,1544;ENCODE ChIP-seq,35;Enrichr Queries,279;ReMap ChIP-seq,155;GTEx Coexpression,113	MARCKS,DDX39A,ABCA6,ABCA9,HMGA1,ACSL5,ABCA8,EFNA5,CENPA,AURKB,SLC27A5
gene_set_query	303	KDM2A	425.5	ARCHS4 Coexpression,689;GTEx Coexpression,162	ILF3,DDX39A,TGFB1
gene_set_query	304	POU2F2	426.8	ARCHS4 Coexpression,896;ENCODE ChIP-seq,34;Enrichr Queries,808;ReMap ChIP-seq,41;GTEx Coexpression,355	TGFB1,PLK1,KIF11,AURKB,CDC20,ILF3,DDX39A,UBE2S,SNRPD1,CAT,TACC3,LONP2,MYBL2,GTSE1,SLC27A5
gene_set_query	305	ZNF146	427.7	ARCHS4 Coexpression,46;Enrichr Queries,132;GTEx Coexpression,1105	ILF3,CCNB1,UBE2C,CKS2,KIF23,KIF2C,KIF11,YWHAZ,AURKB,TICRR
gene_set_query	306	RUNX1	427.8	Literature ChIP-seq,57;ARCHS4 Coexpression,437;Enrichr Queries,580;ReMap ChIP-seq,221;GTEx Coexpression,844	TGFB1,ACSL1,HMGA1,CKS2,YWHAZ,CYP8B1,AURKB
gene_set_query	307	BHLHE40	428.3	ARCHS4 Coexpression,480;ENCODE ChIP-seq,52;ReMap ChIP-seq,165;GTEx Coexpression,1016	ILF3,DTYMK,DDX39A,TGFB1,ACSL1,SNRPD1,CHEK1,HMGA1,TACC3,CKS2,SLC7A1,AURKB
gene_set_query	308	ZNF519	429	ARCHS4 Coexpression,301;Enrichr Queries,12;GTEx Coexpression,974	UBE2C,TROAP,PLK1,ABCA9,KIF23,KIF11,CENPA,AURKB,TICRR,CDC20,CCNB2,CCNB1,ORC6,CHEK1,CKS2,TACC3,MYBL2,KIF2C,GTSE1,SLC27A5
gene_set_query	309	ZNF562	430	ARCHS4 Coexpression,330;Enrichr Queries,791;GTEx Coexpression,169	ABCA9,SLC7A1,AURKB,SLC27A5,TICRR
gene_set_query	310	AKAP8	430	ARCHS4 Coexpression,490;Enrichr Queries,92;GTEx Coexpression,708	CDC20,ILF3,DDX39A,CAT,PLK1,YWHAZ,AURKB
gene_set_query	311	NR6A1	430.7	ARCHS4 Coexpression,87;Enrichr Queries,123;GTEx Coexpression,1082	CCNB2,CCNB1,SNRPD1,CHEK1,HMGA1,MYBL2,EFNA5,SLC7A1,AURKB
gene_set_query	312	ZIK1	431.7	ARCHS4 Coexpression,592;Enrichr Queries,38;GTEx Coexpression,665	UBE2C,PLK1,HMGA1,KIF11,AURKB,CDC20,CCNB2,CCNB1,CHEK1,CKS2,MYBL2,KIF2C
gene_set_query	313	ZNF473	432.7	ARCHS4 Coexpression,971;Enrichr Queries,33;GTEx Coexpression,294	UBE2C,PLK1,HMGA1,KIF11,CENPA,AURKB,ILF3,CCNB1,DDX39A,ORC6,CHEK1,CKS2,KIF2C,MYBL2
gene_set_query	314	AHR	433	Literature ChIP-seq,111;ARCHS4 Coexpression,1166;Enrichr Queries,681;ReMap ChIP-seq,83;GTEx Coexpression,124	MARCKS,ABCA6,TROAP,ABCA9,ABCA8,EFNA5,YWHAZ,SLC27A2,AURKB
gene_set_query	315	BNC2	433.7	ARCHS4 Coexpression,686;Enrichr Queries,458;GTEx Coexpression,157	ABCA9,ABCA8,EFNA5,AURKB
gene_set_query	316	ZNF560	434	ARCHS4 Coexpression,67;Enrichr Queries,799;GTEx Coexpression,436	CCNB2,CCNB1,UBE2C,CHEK1,CKS2,KIF2C,MYBL2,AURKB
gene_set_query	317	NKX25	436.5	ARCHS4 Coexpression,639;GTEx Coexpression,234	MYBL2,MLYCD
gene_set_query	318	HOXB7	436.8	Literature ChIP-seq,97;ARCHS4 Coexpression,643;Enrichr Queries,684;ReMap ChIP-seq,292;GTEx Coexpression,468	UBE2S,ACSL1,EPHX2,HMGA1,ACSL5,LONP2,MYBL2,HAO1,GTSE1,AURKB
gene_set_query	319	ZNF398	438	ARCHS4 Coexpression,132;Enrichr Queries,783;GTEx Coexpression,399	ILF3,TACC3,HMGA1,SLC7A1,AURKB,TICRR
gene_set_query	320	HLX	438.3	ARCHS4 Coexpression,248;Enrichr Queries,666;GTEx Coexpression,401	MARCKS,TGFB1,ACSL1,AQP9,AURKB
gene_set_query	321	THAP7	439.3	ARCHS4 Coexpression,227;Enrichr Queries,387;GTEx Coexpression,704	DTYMK,DDX39A,UBE2S,HMGA1,AURKB
gene_set_query	322	ZNF277	440	ARCHS4 Coexpression,598;Enrichr Queries,371;GTEx Coexpression,351	MARCKS,ILF3,CHEK1,CKS2,AURKB
gene_set_query	323	SREBF1	440.3	Literature ChIP-seq,148;ARCHS4 Coexpression,995;ENCODE ChIP-seq,98;Enrichr Queries,1229;ReMap ChIP-seq,40;GTEx Coexpression,132	ILF3,MARCKS,TGFB1,UBE2S,EPHX2,TACC3,SLC7A1,SLC27A5,AURKB,SULT2A1
gene_set_query	324	GLI1	440.5	Literature ChIP-seq,159;ARCHS4 Coexpression,449;Enrichr Queries,1015;GTEx Coexpression,139	ILF3,ABCA9,MYBL2,ABCA8,AURKB
gene_set_query	325	TFEB	441.3	Literature ChIP-seq,120;ARCHS4 Coexpression,530;Enrichr Queries,216;GTEx Coexpression,899	CCNB1,TGFB1,DDX39A,ACSL1,AQP9,HMGA1,AURKB
gene_set_query	326	LYL1	441.4	Literature ChIP-seq,142;ARCHS4 Coexpression,404;Enrichr Queries,804;ReMap ChIP-seq,138;GTEx Coexpression,719	TGFB1,ACSL1,CAT,CENPA,AURKB
gene_set_query	327	ZHX1	441.5	ARCHS4 Coexpression,843;Enrichr Queries,392;ReMap ChIP-seq,215;GTEx Coexpression,316	MARCKS,ABCA6,TROAP,HMGA1,YWHAZ,AURKB
gene_set_query	328	ZNF7	443	ARCHS4 Coexpression,299;Enrichr Queries,339;GTEx Coexpression,691	CKS2,ABCA9,KIF11,AURKB,SLC27A5
gene_set_query	329	HMX3	443.7	ARCHS4 Coexpression,428;Enrichr Queries,850;GTEx Coexpression,53	ILF3,ORC6,SNRPD1,CHEK1,MYBL2,KIF2C,KIF11,CENPA,AURKB
gene_set_query	330	GFI1B	444.8	Literature ChIP-seq,143;ARCHS4 Coexpression,1512;Enrichr Queries,115;ReMap ChIP-seq,51;GTEx Coexpression,403	TGFB1,UBE2C,ABCB4,HMGA1,CENPA,AURKB,CCNB2,CCNB1,DDX39A,TACC3,CKS2,MYBL2,PEX11G
gene_set_query	331	FOXP2	446	Literature ChIP-seq,127;ARCHS4 Coexpression,1106;ENCODE ChIP-seq,102;Enrichr Queries,634;ReMap ChIP-seq,48;GTEx Coexpression,659	MARCKS,DDX39A,TGFB1,ABCA6,NR1I2,HMGA1,TACC3,PEX11G,EFNA5,YWHAZ,AURKB
gene_set_query	332	MAFB	446.8	ARCHS4 Coexpression,518;Enrichr Queries,347;ReMap ChIP-seq,280;GTEx Coexpression,642	CYP27A1,MARCKS,ACSL1,ACAA1,AURKB
gene_set_query	333	SOX2	447.4	Literature ChIP-seq,29;ARCHS4 Coexpression,529;Enrichr Queries,94;ReMap ChIP-seq,50;GTEx Coexpression,1535	EPHX2,PLK1,HMGA1,PIPOX,EFNA5,YWHAZ,AURKB,CDC20,CYP39A1,MARCKS,SNRPD1,CKS2,KIF2C,MYBL2,SLC27A2
gene_set_query	334	HIF1A	447.8	Literature ChIP-seq,149;ARCHS4 Coexpression,1356;Enrichr Queries,203;ReMap ChIP-seq,277;GTEx Coexpression,254	MARCKS,TGFB1,ACSL1,KIF23,YWHAZ,AURKB
gene_set_query	335	ZNF658	448	ARCHS4 Coexpression,552;Enrichr Queries,344	ACSL1,ABCA9,KIF11,AURKB
gene_set_query	336	LEUTX	448	ARCHS4 Coexpression,200;Enrichr Queries,1097;GTEx Coexpression,47	CCNB1,ORC6,SNRPD1,UBE2C,CHEK1,MYBL2,KIF11,EFNA5,CENPA,AURKB
gene_set_query	337	MBNL2	448.3	ARCHS4 Coexpression,913;Enrichr Queries,302;GTEx Coexpression,130	MARCKS,TROAP,TACC3,ABCA8,YWHAZ,AURKB
gene_set_query	338	ZNF438	448.7	ARCHS4 Coexpression,271;Enrichr Queries,671;GTEx Coexpression,404	TGFB1,ACSL1,AQP9,AURKB
gene_set_query	339	OTX2	449	ARCHS4 Coexpression,107;Enrichr Queries,469;ReMap ChIP-seq,234;GTEx Coexpression,986	CCNB2,CCNB1,CHEK1,CKS2,PIPOX,KIF23,SLC27A2,AURKB
gene_set_query	340	PRDM14	449.4	Literature ChIP-seq,129;ARCHS4 Coexpression,367;Enrichr Queries,170;ReMap ChIP-seq,286;GTEx Coexpression,1295	CDC20,CHEK1,HMGA1,PIPOX,MYBL2,KIF11,EFNA5,GTSE1,YWHAZ,AURKB
gene_set_query	341	RFX8	451.5	ARCHS4 Coexpression,857;GTEx Coexpression,46	DTYMK,CCNB1,CHEK1,CAT,HMGA1,KIF23,KIF11,GTSE1,CENPA
gene_set_query	342	TCF20	451.7	ARCHS4 Coexpression,495;Enrichr Queries,773;GTEx Coexpression,87	ILF3,TROAP,YWHAZ,SLC7A1,AURKB,RHNO1
gene_set_query	343	NFKB2	451.8	ARCHS4 Coexpression,515;Enrichr Queries,676;ReMap ChIP-seq,196;GTEx Coexpression,420	MARCKS,TGFB1,AQP9,HMGA1,AURKB
gene_set_query	344	ZFP42	453.5	Literature ChIP-seq,124;ARCHS4 Coexpression,199;Enrichr Queries,142;GTEx Coexpression,1349	CCNB1,UBE2C,SNRPD1,CHEK1,AQP9,HMGA1,PIPOX,MYBL2,KIF11,AURKB
gene_set_query	345	CHCHD3	453.5	ARCHS4 Coexpression,499;GTEx Coexpression,408	SNRPD1,CKS2,MLYCD
gene_set_query	346	TET3	454	ARCHS4 Coexpression,119;ReMap ChIP-seq,296;GTEx Coexpression,947	ILF3,TACC3,SLC7A1,TICRR
gene_set_query	347	ETS1	454.3	Literature ChIP-seq,145;ARCHS4 Coexpression,809;ENCODE ChIP-seq,9;Enrichr Queries,685;ReMap ChIP-seq,45;GTEx Coexpression,1033	DTYMK,TGFB1,ABCB4,AQP9,HMGA1,ACSL5,KIF23,KIF11,YWHAZ,SLC7A1,CENPA,AURKB,MARCKS,ILF3,DDX39A,SNRPD1,CAT,TACC3,CKS2,SLC27A5
gene_set_query	348	ZNF318	454.8	ARCHS4 Coexpression,823;Enrichr Queries,821;ReMap ChIP-seq,108;GTEx Coexpression,67	CCNB2,ILF3,MARCKS,ORC6,ACSL1,PLK1,CKS2,MYBL2,KIF2C,CENPA,AURKB
gene_set_query	349	ZNF624	455.3	ARCHS4 Coexpression,287;Enrichr Queries,951;GTEx Coexpression,128	MARCKS,CHEK1,ABCA9,KIF23,AURKB
gene_set_query	350	AHCTF1	456	ARCHS4 Coexpression,108;Enrichr Queries,234;GTEx Coexpression,1026	ILF3,HMGA1,KIF2C,KIF11,AURKB,TICRR
gene_set_query	351	NR0B1	457.5	Literature ChIP-seq,51;ARCHS4 Coexpression,1078;Enrichr Queries,495;GTEx Coexpression,206	UBE2C,EPHX2,CKS2,HMGA1,PIPOX,MYBL2,SLC27A2,AURKB,SULT2A1
gene_set_query	352	IRF4	457.6	ARCHS4 Coexpression,503;ENCODE ChIP-seq,109;Enrichr Queries,1348;ReMap ChIP-seq,265;GTEx Coexpression,63	MARCKS,ILF3,ORC6,CHEK1,LONP2,MYBL2,KIF11,CENPA,GTSE1,SLC7A1,AURKB
gene_set_query	353	ARID5B	457.7	ARCHS4 Coexpression,97;Enrichr Queries,604;GTEx Coexpression,672	MARCKS,ILF3,TACC3,MYBL2,AURKB
gene_set_query	354	YY2	459	ARCHS4 Coexpression,558;Enrichr Queries,660;GTEx Coexpression,159	MARCKS,CHEK1,KIF23,AURKB
gene_set_query	355	ZNF696	459.3	ARCHS4 Coexpression,83;Enrichr Queries,248;GTEx Coexpression,1047	ILF3,ORC6,SCP2,SNRPD1,UBE2S,KIF2C,YWHAZ,AURKB
gene_set_query	356	GRHL2	459.4	Literature ChIP-seq,76;ARCHS4 Coexpression,884;Enrichr Queries,696;ReMap ChIP-seq,42;GTEx Coexpression,599	UBE2C,HMGA1,ABCA9,EFNA5,BAAT,CENPA,AURKB,CDC20,AR,ILF3,KIF2C,ACAA1,ALDH8A1
gene_set_query	357	MEOX1	461.3	ARCHS4 Coexpression,144;Enrichr Queries,917;GTEx Coexpression,323	ACSL1,CAT,ABCA9,ABCA8,AURKB
gene_set_query	358	FLI1	461.7	Literature ChIP-seq,71;ARCHS4 Coexpression,835;ENCODE ChIP-seq,14;Enrichr Queries,563;ReMap ChIP-seq,101;GTEx Coexpression,1186	DTYMK,TGFB1,PLK1,HMGA1,KIF23,CENPA,AURKB,TICRR,CYP27A1,DDX39A,SNRPD1,CHEK1,TACC3,CKS2,LONP2,MYBL2,KIF2C,MLYCD,ALDH8A1,GTSE1,SLC27A2,SLC27A5,RHNO1
gene_set_query	359	ZNF280D	463	ARCHS4 Coexpression,164;Enrichr Queries,1091;GTEx Coexpression,134	ABCA6,ABCA9,TACC3,AURKB,SLC27A5
gene_set_query	360	MNT	464	ARCHS4 Coexpression,964;Enrichr Queries,229;ReMap ChIP-seq,113;GTEx Coexpression,550	MARCKS,TGFB1,TACC3,HMGA1,CENPA,YWHAZ,AURKB
gene_set_query	361	ZSCAN30	466	ARCHS4 Coexpression,372;GTEx Coexpression,560	ABCA9,SLC27A5
gene_set_query	362	HOXD10	466.3	ARCHS4 Coexpression,90;Enrichr Queries,1021;GTEx Coexpression,288	AR,ILF3,MYBL2,SLC7A1,AURKB,TICRR
gene_set_query	363	MBD3	468	ARCHS4 Coexpression,163;Enrichr Queries,102;ReMap ChIP-seq,269;GTEx Coexpression,1338	CDC20,ILF3,DDX39A,UBE2S,TROAP,HMGA1,MYBL2,AURKB
gene_set_query	364	TERF2	468.3	ARCHS4 Coexpression,682;Enrichr Queries,197;ReMap ChIP-seq,243;GTEx Coexpression,751	ILF3,ORC6,SNRPD1,PLK1,KIF2C,YWHAZ,AURKB
gene_set_query	365	ISL2	468.7	ARCHS4 Coexpression,25;Enrichr Queries,882;GTEx Coexpression,499	CDC20,DTYMK,UBE2S,TROAP,AQP9,MYBL2,KIF2C,AURKB,TICRR
gene_set_query	366	ZNF212	469.7	ARCHS4 Coexpression,252;Enrichr Queries,447;GTEx Coexpression,710	ILF3,DDX39A,HMGA1,TACC3,SLC7A1,AURKB
gene_set_query	367	PRR12	471.3	ARCHS4 Coexpression,716;Enrichr Queries,393;GTEx Coexpression,305	ILF3,MARCKS,HMGA1,AURKB
gene_set_query	368	LHX4	471.7	ARCHS4 Coexpression,338;Enrichr Queries,631;GTEx Coexpression,446	ILF3,AQP9,EFNA5,AURKB,TICRR
gene_set_query	369	BORCS8MEF2B	472	ARCHS4 Coexpression,472	TGFB1,AQP9
gene_set_query	370	MBD6	472.5	ARCHS4 Coexpression,721;GTEx Coexpression,224	ILF3,TGFB1
gene_set_query	371	MBD1	473	ARCHS4 Coexpression,701;Enrichr Queries,362;GTEx Coexpression,356	ILF3,DDX39A,TGFB1,HMGA1,AURKB
gene_set_query	372	ZNF780A	473	ARCHS4 Coexpression,174;Enrichr Queries,958;GTEx Coexpression,287	ABCA6,AQP9,ABCA9,AURKB,SLC27A5
gene_set_query	373	NFIA	473.7	ARCHS4 Coexpression,780;Enrichr Queries,307;GTEx Coexpression,334	MARCKS,TACC3,EFNA5,AURKB
gene_set_query	374	TCF15	473.7	ARCHS4 Coexpression,482;Enrichr Queries,736;GTEx Coexpression,203	SNRPD1,CKS2,MLYCD,SLC27A2,AURKB
gene_set_query	375	KLF4	474.4	Literature ChIP-seq,7;ARCHS4 Coexpression,1071;Enrichr Queries,700;ReMap ChIP-seq,13;GTEx Coexpression,581	TGFB1,UBE2C,HMGA1,PIPOX,EFNA5,YWHAZ,AURKB,CDC20,MARCKS,ILF3,CCNB1,DDX39A,CHEK1,MYBL2,SLC27A5
gene_set_query	376	ZIC3	475.3	Literature ChIP-seq,32;ARCHS4 Coexpression,423;Enrichr Queries,638;GTEx Coexpression,808	ILF3,EPHX2,HMGA1,PIPOX,KIF23,SLC27A2,AURKB
gene_set_query	377	DMRTA1	475.3	ARCHS4 Coexpression,712;Enrichr Queries,691;GTEx Coexpression,23	TGFB1,SLC10A1,ABCB4,PIPOX,HSD17B6,BAAT,ABCB11,EFNA5,CYP8B1,AURKB,SCP2,HAO1,ACAA1,AGXT,ALDH8A1,SLC27A2,SLC27A5
gene_set_query	378	ZNF121	476.3	ARCHS4 Coexpression,562;Enrichr Queries,54;GTEx Coexpression,813	ILF3,SNRPD1,CHEK1,PLK1,CKS2,HMGA1,KIF2C,KIF11,SLC7A1,AURKB
gene_set_query	379	ZBTB16	477.5	ARCHS4 Coexpression,226;Enrichr Queries,528;ReMap ChIP-seq,58;GTEx Coexpression,1098	CDC20,UBE2C,ACSL1,ABCA6,TROAP,ABCA9,PIPOX,ABCA8,CENPA,AURKB
gene_set_query	380	SLC2A4RG	479	ARCHS4 Coexpression,1338;Enrichr Queries,77;GTEx Coexpression,22	SLC10A1,UBE2C,EPHX2,PLK1,HMGA1,PIPOX,KIF11,BAAT,CYP8B1,AURKB,CYP27A1,CYP39A1,CDC20,AR,SCP2,CAT,HAO1,MYBL2,AGXT,ALDH8A1,SLC27A5
gene_set_query	381	ZNF462	479.3	ARCHS4 Coexpression,668;Enrichr Queries,353;GTEx Coexpression,417	MARCKS,TGFB1,EFNA5,AURKB
gene_set_query	382	TRERF1	479.7	ARCHS4 Coexpression,859;Enrichr Queries,420;GTEx Coexpression,160	MARCKS,TGFB1,TACC3,EFNA5,YWHAZ,AURKB
gene_set_query	383	ISL1	481	ARCHS4 Coexpression,899;Enrichr Queries,280;GTEx Coexpression,264	AR,MARCKS,EPHX2,EFNA5,AURKB
gene_set_query	384	CRX	482.3	Literature ChIP-seq,106;ARCHS4 Coexpression,1520;Enrichr Queries,270;GTEx Coexpression,33	SLC10A1,NR1I2,PLK1,HMGA1,PIPOX,HSD17B6,BAAT,EFNA5,CYP8B1,AURKB,CYP27A1,SCP2,HAO1,MYBL2,ACAA1,AGXT,ALDH8A1,SLC27A5
gene_set_query	385	JUN	482.7	Literature ChIP-seq,117;ARCHS4 Coexpression,1585;ENCODE ChIP-seq,60;Enrichr Queries,611;ReMap ChIP-seq,282;GTEx Coexpression,241	DTYMK,ABCB4,ABCA9,HMGA1,PIPOX,KIF11,EFNA5,YWHAZ,AURKB,CYP39A1,CCNB2,MARCKS,DDX39A,UBE2S,SNRPD1,ALDH8A1
gene_set_query	386	RARG	483	Literature ChIP-seq,72;ARCHS4 Coexpression,952;Enrichr Queries,341;GTEx Coexpression,567	TGFB1,UBE2C,HMGA1,SLC7A1,AURKB
gene_set_query	387	ZNF724	483	ARCHS4 Coexpression,946;GTEx Coexpression,20	UBE2C,PLK1,KIF23,KIF11,CENPA,AURKB,TICRR,CDC20,CCNB1,ORC6,SNRPD1,CHEK1,CKS2,MYBL2,GTSE1
gene_set_query	388	NFE4	483	GTEx Coexpression,483	AQP9
gene_set_query	389	ZNF480	483.3	ARCHS4 Coexpression,583;Enrichr Queries,366;GTEx Coexpression,501	CHEK1,ABCA9,MLYCD,KIF11,AURKB
gene_set_query	390	NR5A2	484.3	ARCHS4 Coexpression,396;Enrichr Queries,561;ReMap ChIP-seq,233;GTEx Coexpression,747	NR1I2,HMGA1,EFNA5,CENPA,AURKB,SLC27A5
gene_set_query	391	RELB	484.8	ARCHS4 Coexpression,457;Enrichr Queries,710;ReMap ChIP-seq,249;GTEx Coexpression,523	TGFB1,DDX39A,AQP9,AURKB
gene_set_query	392	HIVEP1	485.3	ARCHS4 Coexpression,723;Enrichr Queries,198;GTEx Coexpression,535	MARCKS,ACSL1,ABCA6,SLC7A1,AURKB
gene_set_query	393	ZNF548	485.7	ARCHS4 Coexpression,102;Enrichr Queries,1202;GTEx Coexpression,153	DDX39A,ABCA6,ABCA9,ABCA8,AURKB,SLC27A5,RHNO1
gene_set_query	394	HOXA9	486	ARCHS4 Coexpression,283;Enrichr Queries,514;ReMap ChIP-seq,201;GTEx Coexpression,946	CAT,CKS2,HMGA1,TACC3,KIF2C,AURKB
gene_set_query	395	SRY	486.5	Literature ChIP-seq,24;ARCHS4 Coexpression,1141;Enrichr Queries,173;GTEx Coexpression,608	UBE2C,NR1I2,PLK1,HMGA1,ABCB11,EFNA5,YWHAZ,AURKB,CYP27A1,AR,ILF3,MARCKS,UBE2S,TACC3,MYBL2,AGXT,GTSE1,SLC27A2
gene_set_query	396	SOX13	486.5	ARCHS4 Coexpression,450;Enrichr Queries,1153;ReMap ChIP-seq,198;GTEx Coexpression,145	ILF3,ABCA6,ACSL1,ABCA9,HMGA1,ACSL5,AURKB
gene_set_query	397	NFE2	486.8	ARCHS4 Coexpression,446;ENCODE ChIP-seq,76;Enrichr Queries,1350;ReMap ChIP-seq,104;GTEx Coexpression,458	TGFB1,UBE2C,AQP9,HMGA1,YWHAZ,AURKB,CYP39A1,ILF3,CCNB1,DDX39A,UBE2S,CAT,CKS2
gene_set_query	398	TCF4	487.6	Literature ChIP-seq,128;ARCHS4 Coexpression,326;Enrichr Queries,659;ReMap ChIP-seq,57;GTEx Coexpression,1268	TGFB1,ACSL1,ABCB4,HMGA1,ABCA9,ACSL5,PIPOX,EFNA5,AURKB,CDC20,AR,CCNB2,MARCKS,ILF3,CAT,KIF2C
gene_set_query	399	POU4F1	487.7	ARCHS4 Coexpression,837;Enrichr Queries,520;GTEx Coexpression,106	ILF3,ORC6,SNRPD1,MYBL2,EFNA5,AURKB
gene_set_query	400	GTF3A	489	ARCHS4 Coexpression,828;Enrichr Queries,154;GTEx Coexpression,485	CDC20,DDX39A,CKS2,MLYCD,YWHAZ,AURKB
gene_set_query	401	UBP1	489.3	ARCHS4 Coexpression,477;Enrichr Queries,408;GTEx Coexpression,583	MARCKS,ILF3,YWHAZ,SLC7A1,AURKB
gene_set_query	402	HOXB13	490.8	ARCHS4 Coexpression,821;Enrichr Queries,896;ReMap ChIP-seq,32;GTEx Coexpression,214	AR,SNRPD1,LONP2,PIPOX,ABCB11,EFNA5,AURKB
gene_set_query	403	HOXD11	491.3	ARCHS4 Coexpression,80;Enrichr Queries,875;GTEx Coexpression,519	AR,ILF3,UBE2S,MYBL2,SLC7A1,AURKB,TICRR
gene_set_query	404	NR3C2	491.7	ARCHS4 Coexpression,414;Enrichr Queries,503;GTEx Coexpression,558	EPHX2,NR1I2,ACSL5,AURKB
gene_set_query	405	STAT2	496.2	ARCHS4 Coexpression,541;ENCODE ChIP-seq,92;Enrichr Queries,262;ReMap ChIP-seq,236;GTEx Coexpression,1350	MARCKS,ACSL1,AQP9,HMGA1,ACAA1,AURKB
gene_set_query	406	STAT6	496.3	Literature ChIP-seq,123;ARCHS4 Coexpression,833;Enrichr Queries,372;GTEx Coexpression,657	TGFB1,HMGA1,YWHAZ,AURKB
gene_set_query	407	FOXD4L5	497	ARCHS4 Coexpression,416;Enrichr Queries,863;GTEx Coexpression,212	ABCA9,AURKB,SLC27A5
gene_set_query	408	AHRR	497.5	ARCHS4 Coexpression,966;GTEx Coexpression,29	UBE2C,PLK1,KIF23,KIF11,CENPA,SLC7A1,AURKB,CDC20,CCNB2,CCNB1,ORC6,CHEK1,CKS2,MYBL2,GTSE1
gene_set_query	409	SOX11	498.6	Literature ChIP-seq,83;ARCHS4 Coexpression,661;Enrichr Queries,95;ReMap ChIP-seq,74;GTEx Coexpression,1580	UBE2C,TROAP,NR1I2,PLK1,EFNA5,CENPA,AURKB,CDC20,CCNB2,ILF3,MARCKS,ORC6,CKS2,SLC27A2
gene_set_query	410	TAL2	499	ARCHS4 Coexpression,329;Enrichr Queries,357;GTEx Coexpression,811	MARCKS,PIPOX,EFNA5,AURKB
gene_set_query	411	GMEB1	499	ARCHS4 Coexpression,776;Enrichr Queries,214;GTEx Coexpression,507	ILF3,TACC3,HMGA1,YWHAZ,AURKB,SLC27A5
gene_set_query	412	RUNX2	500	Literature ChIP-seq,28;ARCHS4 Coexpression,546;Enrichr Queries,305;ReMap ChIP-seq,285;GTEx Coexpression,1336	DTYMK,TGFB1,EPHX2,AQP9,EFNA5,YWHAZ,SLC7A1,CYP8B1,AURKB,MARCKS,ORC6,CAT,CKS2,KIF2C,HAO1,MLYCD,ACAA1,ALDH8A1
gene_set_query	413	ZNF777	500.3	ARCHS4 Coexpression,393;Enrichr Queries,429;GTEx Coexpression,679	ILF3,PLK1,HMGA1,SLC7A1,AURKB
gene_set_query	414	HOXC11	500.5	ARCHS4 Coexpression,137;Enrichr Queries,925;ReMap ChIP-seq,294;GTEx Coexpression,646	UBE2S,TROAP,MYBL2,AURKB,TICRR
gene_set_query	415	NFATC1	500.6	ARCHS4 Coexpression,1002;ENCODE ChIP-seq,111;Enrichr Queries,626;ReMap ChIP-seq,159;GTEx Coexpression,605	TGFB1,PLK1,TACC3,YWHAZ,AURKB
gene_set_query	416	SOX17	501.5	Literature ChIP-seq,61;ARCHS4 Coexpression,609;Enrichr Queries,1188;GTEx Coexpression,148	CDC20,MARCKS,ABCA6,NR1I2,ABCA9,MYBL2,KIF23,YWHAZ,AURKB
gene_set_query	417	ZNF674	501.7	ARCHS4 Coexpression,270;Enrichr Queries,470;GTEx Coexpression,765	ORC6,ABCA9,AURKB,SLC27A5
gene_set_query	418	ZNF490	503.7	ARCHS4 Coexpression,279;Enrichr Queries,748;GTEx Coexpression,484	CCNB1,ORC6,TACC3,AURKB,SLC27A5
gene_set_query	419	PBX3	505.2	ARCHS4 Coexpression,1081;ENCODE ChIP-seq,43;Enrichr Queries,178;ReMap ChIP-seq,20;GTEx Coexpression,1204	TGFB1,ACSL1,UBE2C,TROAP,PLK1,HMGA1,EFNA5,CENPA,AURKB,CCNB2,MARCKS,DDX39A,UBE2S,CAT,ACAA1,SLC27A5
gene_set_query	420	KLF3	505.8	ARCHS4 Coexpression,732;Enrichr Queries,407;ReMap ChIP-seq,68;GTEx Coexpression,816	MARCKS,TGFB1,TACC3,PIPOX,KIF2C,EFNA5,YWHAZ,AURKB
gene_set_query	421	ZNF101	506.3	ARCHS4 Coexpression,680;Enrichr Queries,457;GTEx Coexpression,382	TACC3,CKS2,AURKB,SLC27A5
gene_set_query	422	ZNF837	506.7	ARCHS4 Coexpression,956;Enrichr Queries,456;GTEx Coexpression,108	CYP39A1,UBE2S,EPHX2,LONP2,ACAA1,AURKB
gene_set_query	423	ZNF534	507.5	ARCHS4 Coexpression,123;GTEx Coexpression,892	ORC6,CHEK1,MYBL2,CENPA
gene_set_query	424	GLYR1	507.7	ARCHS4 Coexpression,656;ReMap ChIP-seq,30;GTEx Coexpression,837	CCNB2,ILF3,CHEK1,KIF23,KIF2C,TICRR
gene_set_query	425	ZNF681	508.7	ARCHS4 Coexpression,1291;Enrichr Queries,147;GTEx Coexpression,88	CDC20,ORC6,MYBL2,KIF11,CENPA,AURKB,RHNO1,TICRR
gene_set_query	426	ZNF335	509.3	ARCHS4 Coexpression,687;Enrichr Queries,805;ReMap ChIP-seq,297;GTEx Coexpression,248	ILF3,TGFB1,PLK1,AURKB
gene_set_query	427	PHOX2A	509.3	ARCHS4 Coexpression,415;Enrichr Queries,876;GTEx Coexpression,237	ILF3,UBE2S,AURKB,SULT2A1
gene_set_query	428	ESR2	509.4	Literature ChIP-seq,125;ARCHS4 Coexpression,566;Enrichr Queries,324;ReMap ChIP-seq,173;GTEx Coexpression,1359	MARCKS,TGFB1,CHEK1,TACC3,ABCA9,PEX11G,SLC7A1,AURKB
gene_set_query	429	ZZZ3	509.4	ARCHS4 Coexpression,553;ENCODE ChIP-seq,117;Enrichr Queries,782;ReMap ChIP-seq,56;GTEx Coexpression,1039	ORC6,TGFB1,YWHAZ,AURKB
gene_set_query	430	ZNF668	509.7	ARCHS4 Coexpression,877;Enrichr Queries,384;GTEx Coexpression,268	UBE2S,TACC3,HMGA1,AURKB
gene_set_query	431	KLF5	510	Literature ChIP-seq,45;ARCHS4 Coexpression,827;Enrichr Queries,683;ReMap ChIP-seq,206;GTEx Coexpression,789	TGFB1,UBE2C,ABCA6,ABCB4,EPHX2,HMGA1,ACSL5,KIF11,CENPA,AURKB,CDC20,ILF3,ALDH8A1,SULT2A1
gene_set_query	432	SP1	510.4	ARCHS4 Coexpression,1153;ENCODE ChIP-seq,20;Enrichr Queries,378;ReMap ChIP-seq,266;GTEx Coexpression,735	UBE2C,TROAP,HMGA1,YWHAZ,CENPA,AURKB,CCNB1,DDX39A,ORC6,UBE2S,CKS2,TACC3
gene_set_query	433	MAF	511	ARCHS4 Coexpression,595;Enrichr Queries,553;ReMap ChIP-seq,219;GTEx Coexpression,677	MARCKS,DDX39A,TACC3,ACSL5,AURKB
gene_set_query	434	ETV1	512	ARCHS4 Coexpression,588;Enrichr Queries,704;ReMap ChIP-seq,212;GTEx Coexpression,544	MARCKS,EFNA5,YWHAZ,SLC27A5,AURKB
gene_set_query	435	KLF13	512.3	ARCHS4 Coexpression,664;Enrichr Queries,398;ReMap ChIP-seq,181;GTEx Coexpression,806	MARCKS,TGFB1,HMGA1,PEX11G,YWHAZ,AURKB
gene_set_query	436	ZBTB25	512.3	ARCHS4 Coexpression,154;Enrichr Queries,682;GTEx Coexpression,701	ORC6,HMGA1,ABCA9,AURKB,SLC27A5
gene_set_query	437	JUND	512.7	Literature ChIP-seq,146;ARCHS4 Coexpression,713;ENCODE ChIP-seq,57;Enrichr Queries,600;ReMap ChIP-seq,259;GTEx Coexpression,1301	DTYMK,TGFB1,HMGA1,KIF23,KIF11,YWHAZ,AURKB,MARCKS,DDX39A,MLYCD,PEX11G,GTSE1,SLC27A2
gene_set_query	438	TCF12	512.8	ARCHS4 Coexpression,359;ENCODE ChIP-seq,55;Enrichr Queries,409;ReMap ChIP-seq,139;GTEx Coexpression,1602	TGFB1,UBE2C,TROAP,HMGA1,PIPOX,KIF11,YWHAZ,CENPA,AURKB,MARCKS,SNRPD1,TACC3
gene_set_query	439	ATF1	513.8	ARCHS4 Coexpression,1447;ENCODE ChIP-seq,61;Enrichr Queries,117;ReMap ChIP-seq,19;GTEx Coexpression,925	DTYMK,ACSL1,TROAP,PLK1,KIF11,ABCA8,YWHAZ,AURKB,CDC20,CCNB1,DDX39A,UBE2S,CAT,CKS2,LONP2,MYBL2,PEX11G,ACAA1,GTSE1
gene_set_query	440	ZNF467	514.7	ARCHS4 Coexpression,466;Enrichr Queries,576;GTEx Coexpression,502	MARCKS,TGFB1,AQP9,AURKB
gene_set_query	441	ZNF530	515	ARCHS4 Coexpression,548;Enrichr Queries,14;GTEx Coexpression,983	UBE2C,TROAP,PLK1,ABCA9,KIF23,KIF11,CENPA,AURKB,TICRR,CDC20,CCNB2,CCNB1,ORC6,UBE2S,CHEK1,CKS2,TACC3,MYBL2,KIF2C
gene_set_query	442	MSGN1	516.3	ARCHS4 Coexpression,627;Enrichr Queries,735;GTEx Coexpression,187	CKS2,EFNA5,SLC7A1,AURKB,TICRR
gene_set_query	443	FOXA1	516.7	Literature ChIP-seq,138;ARCHS4 Coexpression,951;ENCODE ChIP-seq,30;Enrichr Queries,588;ReMap ChIP-seq,73;GTEx Coexpression,1320	ACSL1,PIPOX,ACSL5,KIF11,HSD17B6,EFNA5,YWHAZ,AURKB,CYP27A1,AR,ILF3,MARCKS,ORC6,LONP2,MLYCD,AGXT,SLC27A2,SLC27A5,SULT2A1
gene_set_query	444	GFI1	517	ARCHS4 Coexpression,216;Enrichr Queries,825;GTEx Coexpression,510	CDC20,TGFB1,CAT,TACC3,AURKB
gene_set_query	445	USF2	518	ARCHS4 Coexpression,714;ENCODE ChIP-seq,58;Enrichr Queries,136;ReMap ChIP-seq,88;GTEx Coexpression,1594	TGFB1,HMGA1,KIF11,CENPA,YWHAZ,AURKB,CCNB2,ILF3,CCNB1,DDX39A,UBE2S,SNRPD1,LONP2,KIF2C,PEX11G,ACAA1,GTSE1
gene_set_query	446	ZNF45	518.3	ARCHS4 Coexpression,208;Enrichr Queries,556;GTEx Coexpression,791	KIF23,KIF11,AURKB,TICRR
gene_set_query	447	SHOX2	518.7	ARCHS4 Coexpression,819;Enrichr Queries,487;GTEx Coexpression,250	ABCA6,UBE2S,EFNA5,AURKB
gene_set_query	448	ZNF114	518.7	ARCHS4 Coexpression,793;Enrichr Queries,107;GTEx Coexpression,656	CDC20,UBE2C,SNRPD1,MYBL2,KIF23,KIF2C,AURKB
gene_set_query	449	NFIL3	520.3	ARCHS4 Coexpression,451;Enrichr Queries,725;GTEx Coexpression,385	ACSL1,AQP9,AURKB
gene_set_query	450	ESRRA	521	ARCHS4 Coexpression,1369;ENCODE ChIP-seq,53;Enrichr Queries,442;ReMap ChIP-seq,250;GTEx Coexpression,491	DTYMK,DDX39A,ACSL1,HMGA1,TACC3,LONP2,MLYCD,CENPA,AURKB,SLC27A5
gene_set_query	451	NR1H2	521.5	ARCHS4 Coexpression,302;Enrichr Queries,411;ReMap ChIP-seq,67;GTEx Coexpression,1306	CDC20,TGFB1,AQP9,HMGA1,ACSL5,ABCB11,AURKB
gene_set_query	452	ZSCAN10	522.3	ARCHS4 Coexpression,465;Enrichr Queries,130;GTEx Coexpression,972	ILF3,HMGA1,PIPOX,MYBL2,SLC27A2,AURKB
gene_set_query	453	ZNF609	523	ARCHS4 Coexpression,413;Enrichr Queries,806;GTEx Coexpression,350	MARCKS,ILF3,KIF2C,SLC7A1,AURKB
gene_set_query	454	ZBTB32	523	ARCHS4 Coexpression,1057;Enrichr Queries,426;GTEx Coexpression,86	CCNB2,DDX39A,UBE2S,UBE2C,KIF2C,MYBL2,AURKB
gene_set_query	455	ZBTB5	524	ARCHS4 Coexpression,147;Enrichr Queries,573;GTEx Coexpression,852	ILF3,ACSL1,KIF2C,AURKB,TICRR
gene_set_query	456	ETV5	524.7	ARCHS4 Coexpression,232;Enrichr Queries,336;GTEx Coexpression,1006	CCNB1,MARCKS,HMGA1,KIF23,SLC7A1,AURKB
gene_set_query	457	HOXD9	524.7	ARCHS4 Coexpression,395;Enrichr Queries,909;GTEx Coexpression,270	AR,ILF3,UBE2S,AURKB
gene_set_query	458	ZNF22	524.7	ARCHS4 Coexpression,385;Enrichr Queries,79;GTEx Coexpression,1110	CDC20,CCNB1,MARCKS,UBE2C,SNRPD1,CKS2,KIF11,AURKB
gene_set_query	459	HOXB4	525.5	Literature ChIP-seq,13;ARCHS4 Coexpression,71;Enrichr Queries,1201;GTEx Coexpression,817	DTYMK,AQP9,HMGA1,CENPA,AURKB,TICRR,ILF3,DDX39A,UBE2S,CHEK1,CKS2,KIF2C,SLC27A2
gene_set_query	460	ZNF766	526.3	ARCHS4 Coexpression,332;Enrichr Queries,1328;ReMap ChIP-seq,268;GTEx Coexpression,177	DDX39A,ORC6,ABCA9,KIF2C,AURKB,SLC27A5
gene_set_query	461	ZNF275	527	ARCHS4 Coexpression,333;Enrichr Queries,992;GTEx Coexpression,256	ILF3,SLC7A1,AURKB,SULT2A1
gene_set_query	462	ZFP91	527.7	ARCHS4 Coexpression,885;Enrichr Queries,431;GTEx Coexpression,267	MARCKS,KIF2C,YWHAZ,SLC7A1,AURKB
gene_set_query	463	PAX5	527.8	ARCHS4 Coexpression,1183;ENCODE ChIP-seq,67;Enrichr Queries,1168;ReMap ChIP-seq,100;GTEx Coexpression,121	MARCKS,ORC6,DDX39A,TGFB1,HMGA1,TACC3,LONP2,MYBL2,YWHAZ,AURKB
gene_set_query	464	ETV6	528	ARCHS4 Coexpression,438;Enrichr Queries,800;ReMap ChIP-seq,71;GTEx Coexpression,803	MARCKS,TGFB1,CAT,HMGA1,YWHAZ,SLC27A5,AURKB
gene_set_query	465	ZNF684	528	ARCHS4 Coexpression,1350;Enrichr Queries,210;GTEx Coexpression,24	SLC10A1,ABCB4,PIPOX,HSD17B6,KIF11,BAAT,CYP8B1,AURKB,CYP27A1,CDC20,SCP2,HAO1,KIF2C,ACAA1,AGXT,ALDH8A1,SLC27A2,SLC27A5
gene_set_query	466	PDX1	528.2	Literature ChIP-seq,139;ARCHS4 Coexpression,1063;Enrichr Queries,453;ReMap ChIP-seq,220;GTEx Coexpression,766	TACC3,LONP2,EFNA5,YWHAZ,AURKB
gene_set_query	467	TFE3	529	ARCHS4 Coexpression,864;Enrichr Queries,243;GTEx Coexpression,480	MARCKS,TGFB1,HMGA1,AURKB
gene_set_query	468	NANOGNB	529	ARCHS4 Coexpression,908;GTEx Coexpression,150	DDX39A,ORC6,UBE2S
gene_set_query	469	ZNF544	529.3	ARCHS4 Coexpression,1416;Enrichr Queries,110;GTEx Coexpression,62	TROAP,PLK1,HMGA1,SLC7A1,AURKB,CDC20,CCNB2,ILF3,CCNB1,ORC6,CKS2,RHNO1
gene_set_query	470	ERG	529.6	Literature ChIP-seq,17;ARCHS4 Coexpression,281;Enrichr Queries,893;ReMap ChIP-seq,89;GTEx Coexpression,1368	TGFB1,ACSL1,HMGA1,ACSL5,YWHAZ,CENPA,AURKB,AR,ILF3,DDX39A,ORC6,CAT,TACC3,MYBL2,MLYCD,GTSE1
gene_set_query	471	MEIS1	530	Literature ChIP-seq,103;ARCHS4 Coexpression,1408;Enrichr Queries,267;ReMap ChIP-seq,143;GTEx Coexpression,729	MARCKS,ILF3,TGFB1,ACSL5,MLYCD,EFNA5,SLC27A2,CYP8B1,AURKB
gene_set_query	472	TET2	530	ARCHS4 Coexpression,344;GTEx Coexpression,716	ACSL1,AQP9
gene_set_query	473	ZNF282	530	ARCHS4 Coexpression,463;Enrichr Queries,112;GTEx Coexpression,1015	CDC20,ILF3,UBE2S,HMGA1,MYBL2,SLC7A1,AURKB
gene_set_query	474	GTF2IRD2B	530.3	ARCHS4 Coexpression,198;Enrichr Queries,1075;GTEx Coexpression,318	ABCA9,HMGA1,MYBL2,YWHAZ,AURKB
gene_set_query	475	ZNF232	530.7	ARCHS4 Coexpression,502;Enrichr Queries,78;GTEx Coexpression,1012	CCNB1,SNRPD1,CHEK1,CKS2,HMGA1,MYBL2,KIF11,AURKB
gene_set_query	476	ZNF687	531	ARCHS4 Coexpression,987;Enrichr Queries,448;GTEx Coexpression,158	MARCKS,ILF3,AQP9,TACC3,HMGA1,AURKB
gene_set_query	477	NFE2L1	531	ARCHS4 Coexpression,1458;Enrichr Queries,323;ReMap ChIP-seq,26;GTEx Coexpression,317	UBE2S,ABCA9,HMGA1,KIF2C,MLYCD,ABCB11,YWHAZ,SLC7A1,AURKB,SULT2A1
gene_set_query	478	ZNF274	531.5	Literature ChIP-seq,112;ARCHS4 Coexpression,1170;ENCODE ChIP-seq,112;Enrichr Queries,1278;ReMap ChIP-seq,237;GTEx Coexpression,280	ILF3,HMGA1,BAAT,AURKB
gene_set_query	479	IRF3	532	ARCHS4 Coexpression,758;ENCODE ChIP-seq,3;Enrichr Queries,373;ReMap ChIP-seq,8;GTEx Coexpression,1518	DTYMK,TGFB1,UBE2C,TROAP,PLK1,HMGA1,KIF23,CENPA,AURKB,TICRR,CDC20,CCNB2,CCNB1,DDX39A,ORC6,CAT,CKS2,TACC3,KIF2C,ACAA1,GTSE1
gene_set_query	480	ZNF844	533.5	ARCHS4 Coexpression,182;GTEx Coexpression,885	ORC6,ABCA9,SLC27A5
gene_set_query	481	ARID3A	533.8	ARCHS4 Coexpression,1151;ENCODE ChIP-seq,59;Enrichr Queries,729;ReMap ChIP-seq,258;GTEx Coexpression,472	DTYMK,TGFB1,TROAP,HMGA1,HSD17B6,AURKB,CCNB1,SNRPD1,TACC3,LONP2,ACAA1,SULT2A1
gene_set_query	482	AR	535.4	Literature ChIP-seq,63;ARCHS4 Coexpression,1519;Enrichr Queries,939;ReMap ChIP-seq,135;GTEx Coexpression,21	SLC10A1,ABCB4,EPHX2,PIPOX,ACSL5,KIF23,HSD17B6,BAAT,ABCB11,CYP8B1,AURKB,CYP27A1,CYP39A1,SCP2,TACC3,LONP2,HAO1,AGXT,ALDH8A1,SLC27A5
gene_set_query	483	ZNF703	536.7	ARCHS4 Coexpression,113;Enrichr Queries,641;GTEx Coexpression,856	MARCKS,UBE2S,MYBL2,SLC7A1,AURKB,TICRR
gene_set_query	484	PAX6	537	Literature ChIP-seq,118;ARCHS4 Coexpression,861;Enrichr Queries,534;ReMap ChIP-seq,176;GTEx Coexpression,996	UBE2S,ABCA6,HMGA1,KIF2C,EFNA5,AGXT,AURKB
gene_set_query	485	ZBTB17	537.3	ARCHS4 Coexpression,539;Enrichr Queries,828;GTEx Coexpression,245	TGFB1,AQP9,TACC3,HMGA1,AURKB
gene_set_query	486	ZNF587	537.3	ARCHS4 Coexpression,183;Enrichr Queries,1085;GTEx Coexpression,344	ILF3,ORC6,ABCA9,AURKB,SLC27A5
gene_set_query	487	ZNF205	537.3	ARCHS4 Coexpression,901;Enrichr Queries,325;GTEx Coexpression,386	UBE2S,TACC3,HMGA1,MYBL2,AURKB
gene_set_query	488	ZNF324B	538	ARCHS4 Coexpression,418;GTEx Coexpression,658	ILF3,SLC7A1
gene_set_query	489	CDX4	538.7	ARCHS4 Coexpression,116;Enrichr Queries,555;GTEx Coexpression,945	CCNB1,SNRPD1,UBE2C,CKS2,EFNA5,AURKB
gene_set_query	490	TBX3	539	Literature ChIP-seq,98;ARCHS4 Coexpression,697;Enrichr Queries,1152;GTEx Coexpression,209	AR,ACSL5,PIPOX,MYBL2,AURKB,SULT2A1
gene_set_query	491	PBX2	539.3	ARCHS4 Coexpression,464;Enrichr Queries,388;ReMap ChIP-seq,264;GTEx Coexpression,1041	MARCKS,ILF3,TGFB1,HMGA1,AURKB
gene_set_query	492	MLX	539.3	ARCHS4 Coexpression,930;Enrichr Queries,402;GTEx Coexpression,286	DDX39A,PLK1,HMGA1,MLYCD,AURKB
gene_set_query	493	KLF6	539.5	ARCHS4 Coexpression,965;Enrichr Queries,316;ReMap ChIP-seq,78;GTEx Coexpression,799	MARCKS,HMGA1,TACC3,ACSL5,KIF2C,ABCB11,YWHAZ,AURKB
gene_set_query	494	ZNF584	540	ARCHS4 Coexpression,1133;Enrichr Queries,244;ReMap ChIP-seq,179;GTEx Coexpression,604	UBE2S,AQP9,HMGA1,CENPA,YWHAZ,AURKB,SULT2A1
gene_set_query	495	ZNF689	540.7	ARCHS4 Coexpression,37;Enrichr Queries,404;GTEx Coexpression,1181	CCNB2,CCNB1,UBE2C,PLK1,CHEK1,KIF23,KIF11,AURKB,TICRR
gene_set_query	496	HMGN3	540.8	ARCHS4 Coexpression,531;ENCODE ChIP-seq,74;ReMap ChIP-seq,186;GTEx Coexpression,1372	ILF3,DTYMK,DDX39A,ACSL1,SNRPD1,CAT,HMGA1,TACC3,CKS2,KIF2C,PEX11G,GTSE1
gene_set_query	497	L3MBTL1	541	ARCHS4 Coexpression,361;GTEx Coexpression,721	ABCA9,SLC27A5
gene_set_query	498	NKX32	542	ARCHS4 Coexpression,440;GTEx Coexpression,644	UBE2S,MYBL2
gene_set_query	499	REST	542.3	Literature ChIP-seq,105;ARCHS4 Coexpression,1622;ENCODE ChIP-seq,73;Enrichr Queries,314;ReMap ChIP-seq,262;GTEx Coexpression,878	ACSL1,UBE2C,ABCB4,PIPOX,KIF11,YWHAZ,AURKB,CDC20,CCNB2,MARCKS,ILF3,UBE2S,CAT,MYBL2,HAO1,MLYCD,PEX11G
gene_set_query	500	HOXB6	542.7	ARCHS4 Coexpression,126;Enrichr Queries,1004;GTEx Coexpression,498	ILF3,UBE2S,ACSL5,SLC7A1,AURKB,TICRR
gene_set_query	501	MBD2	543.3	ARCHS4 Coexpression,365;Enrichr Queries,217;ReMap ChIP-seq,272;GTEx Coexpression,1319	MARCKS,TGFB1,ACSL1,TROAP,HMGA1,YWHAZ,AURKB
gene_set_query	502	ZNF84	544.7	ARCHS4 Coexpression,357;Enrichr Queries,952;GTEx Coexpression,325	MARCKS,TGFB1,CHEK1,AURKB
gene_set_query	503	SP8	545.3	ARCHS4 Coexpression,543;Enrichr Queries,519;GTEx Coexpression,574	ILF3,EFNA5,AURKB,TICRR
gene_set_query	504	ATF3	545.7	Literature ChIP-seq,68;ARCHS4 Coexpression,660;ENCODE ChIP-seq,96;Enrichr Queries,1238;ReMap ChIP-seq,98;GTEx Coexpression,1114	TGFB1,ACSL1,UBE2C,HMGA1,ACSL5,PIPOX,KIF23,CENPA,YWHAZ,AURKB,CYP27A1,ILF3,CKS2,TACC3,LONP2
gene_set_query	505	GATA3	545.8	Literature ChIP-seq,56;ARCHS4 Coexpression,1135;ENCODE ChIP-seq,78;Enrichr Queries,1028;ReMap ChIP-seq,146;GTEx Coexpression,832	CYP27A1,MARCKS,ILF3,DDX39A,SNRPD1,MYBL2,KIF2C,AGXT,YWHAZ,CENPA,SLC7A1,AURKB
gene_set_query	506	TAL1	546	Literature ChIP-seq,58;ARCHS4 Coexpression,811;ENCODE ChIP-seq,16;Enrichr Queries,1218;ReMap ChIP-seq,168;GTEx Coexpression,1005	DTYMK,TGFB1,UBE2C,ACSL1,ABCB4,HMGA1,KIF23,YWHAZ,SLC7A1,CENPA,AURKB,CDC20,DDX39A,ORC6,UBE2S,CAT,CKS2,TACC3,MYBL2,ALDH8A1
gene_set_query	507	ZNF891	546.5	ARCHS4 Coexpression,181;GTEx Coexpression,912	ORC6,ABCA9,SLC27A5
gene_set_query	508	RAX	546.7	ARCHS4 Coexpression,635;Enrichr Queries,842;GTEx Coexpression,163	LONP2,EFNA5,AURKB
gene_set_query	509	ETV2	549.3	Literature ChIP-seq,77;ARCHS4 Coexpression,1217;Enrichr Queries,567;GTEx Coexpression,336	CCNB2,EPHX2,KIF2C,MYBL2,HSD17B6,ACAA1,AURKB
gene_set_query	510	ZNF286A	549.3	ARCHS4 Coexpression,266;Enrichr Queries,176;GTEx Coexpression,1206	ILF3,MARCKS,CKS2,KIF11,EFNA5,AURKB
gene_set_query	511	ZNF77	551	ARCHS4 Coexpression,594;Enrichr Queries,223;GTEx Coexpression,836	UBE2C,CHEK1,KIF2C,KIF11,AURKB
gene_set_query	512	ZNF829	551.3	ARCHS4 Coexpression,296;Enrichr Queries,1129;GTEx Coexpression,229	ABCA9,KIF2C,AURKB,SLC27A5
gene_set_query	513	ZBTB9	552.7	ARCHS4 Coexpression,42;Enrichr Queries,133;GTEx Coexpression,1483	CDC20,CCNB1,ILF3,PLK1,HMGA1,KIF23,KIF2C,MYBL2,AURKB
gene_set_query	514	ZNF746	553	ARCHS4 Coexpression,407;Enrichr Queries,1053;GTEx Coexpression,199	TGFB1,AQP9,TACC3,AURKB
gene_set_query	515	CREBZF	553	ARCHS4 Coexpression,435;Enrichr Queries,812;GTEx Coexpression,412	ILF3,MARCKS,AURKB,TICRR
gene_set_query	516	TP73	554.3	ARCHS4 Coexpression,436;Enrichr Queries,125;GTEx Coexpression,1102	CDC20,ILF3,CHEK1,PLK1,MYBL2,AURKB
gene_set_query	517	ZNF100	554.3	ARCHS4 Coexpression,1540;Enrichr Queries,53;GTEx Coexpression,70	CCNB2,ORC6,PLK1,CKS2,KIF2C,MYBL2,KIF11,CENPA,AURKB,TICRR
gene_set_query	518	SMAD3	554.4	Literature ChIP-seq,92;ARCHS4 Coexpression,1299;Enrichr Queries,632;ReMap ChIP-seq,211;GTEx Coexpression,538	CCNB2,TGFB1,DDX39A,ORC6,HMGA1,KIF2C,EFNA5,YWHAZ,SLC7A1,AURKB
gene_set_query	519	ZNF430	556	ARCHS4 Coexpression,1375;Enrichr Queries,171;GTEx Coexpression,122	ORC6,HMGA1,CKS2,YWHAZ,AURKB,RHNO1,TICRR
gene_set_query	520	ZNF648	556.7	ARCHS4 Coexpression,323;Enrichr Queries,1334;GTEx Coexpression,13	SLC10A1,EPHX2,NR1I2,PIPOX,HSD17B6,BAAT,ABCB11,EFNA5,CYP8B1,CYP27A1,CYP39A1,ORC6,SCP2,HAO1,ACAA1,AGXT,ALDH8A1,SLC27A5
gene_set_query	521	DLX3	557.3	ARCHS4 Coexpression,403;Enrichr Queries,716;GTEx Coexpression,553	UBE2C,MYBL2,EFNA5,AURKB
gene_set_query	522	RAG1	558.3	ARCHS4 Coexpression,397;Enrichr Queries,770;GTEx Coexpression,508	ILF3,CAT,KIF11,AURKB
gene_set_query	523	ZNF239	559	ARCHS4 Coexpression,129;Enrichr Queries,62;GTEx Coexpression,1486	CDC20,CCNB1,CHEK1,PLK1,CKS2,KIF2C,KIF23,SLC27A2,SLC7A1,AURKB
gene_set_query	524	PHF21A	561	ARCHS4 Coexpression,506;Enrichr Queries,787;GTEx Coexpression,390	MARCKS,TGFB1,AQP9,AURKB
gene_set_query	525	CEBPE	561.3	ARCHS4 Coexpression,510;Enrichr Queries,817;GTEx Coexpression,357	CDC20,TGFB1,AURKB,TICRR
gene_set_query	526	JRKL	561.7	ARCHS4 Coexpression,1182;Enrichr Queries,427;GTEx Coexpression,76	CCNB2,MARCKS,CHEK1,KIF23,KIF2C,KIF11,AURKB
gene_set_query	527	HINFP	562.3	ARCHS4 Coexpression,387;ReMap ChIP-seq,109;GTEx Coexpression,1191	DDX39A,CHEK1,ABCA9,KIF2C,CENPA,SLC27A5
gene_set_query	528	ZNF714	563.7	ARCHS4 Coexpression,1607;Enrichr Queries,20;GTEx Coexpression,64	UBE2C,TROAP,PLK1,HMGA1,KIF23,KIF11,CENPA,SLC7A1,AURKB,TICRR,CCNB2,CCNB1,ORC6,CHEK1,CKS2,MYBL2,KIF2C,RHNO1
gene_set_query	529	TTF1	564	ARCHS4 Coexpression,193;GTEx Coexpression,935	SNRPD1,CHEK1,CKS2
gene_set_query	530	ZNF443	564.3	ARCHS4 Coexpression,570;Enrichr Queries,606;GTEx Coexpression,517	MARCKS,AQP9,KIF11,AURKB
gene_set_query	531	EVX1	565	ARCHS4 Coexpression,1037;Enrichr Queries,450;GTEx Coexpression,208	AR,EFNA5,AURKB
gene_set_query	532	FOXO3	567.5	Literature ChIP-seq,114;ARCHS4 Coexpression,915;Enrichr Queries,358;GTEx Coexpression,883	MARCKS,ILF3,ORC6,ACSL1,UBE2S,CKS2,TACC3,YWHAZ,AURKB
gene_set_query	533	ZNF486	568	ARCHS4 Coexpression,815;Enrichr Queries,118;GTEx Coexpression,771	CDC20,MARCKS,ORC6,CKS2,ABCA9,AURKB
gene_set_query	534	ESRRB	568.3	Literature ChIP-seq,102;ARCHS4 Coexpression,1221;Enrichr Queries,548;GTEx Coexpression,402	CCNB2,EPHX2,LONP2,MYBL2,KIF23,MLYCD,AURKB
gene_set_query	535	NKX23	569	ARCHS4 Coexpression,601;GTEx Coexpression,537	CAT
gene_set_query	536	HMG20B	569.3	ARCHS4 Coexpression,894;Enrichr Queries,153;GTEx Coexpression,661	CDC20,UBE2S,PLK1,HMGA1,MYBL2,AURKB
gene_set_query	537	NKX31	569.5	ARCHS4 Coexpression,881;GTEx Coexpression,258	AR
gene_set_query	538	SON	569.5	ARCHS4 Coexpression,904;GTEx Coexpression,235	ILF3
gene_set_query	539	ZNF317	569.7	ARCHS4 Coexpression,876;Enrichr Queries,206;GTEx Coexpression,627	ILF3,CKS2,SLC7A1,AURKB
gene_set_query	540	NCOA3	571	ARCHS4 Coexpression,1404;Enrichr Queries,273;ReMap ChIP-seq,77;GTEx Coexpression,530	MARCKS,ABCA6,MYBL2,ABCA8,YWHAZ,SLC27A2,AURKB
gene_set_query	541	ARGFX	571	ARCHS4 Coexpression,100;Enrichr Queries,1299;GTEx Coexpression,314	CCNB1,ORC6,UBE2C,MLYCD,YWHAZ,CENPA
gene_set_query	542	ELF4	571.3	ARCHS4 Coexpression,501;Enrichr Queries,720;GTEx Coexpression,493	TGFB1,AQP9,AURKB
gene_set_query	543	SMAD4	571.8	Literature ChIP-seq,75;ARCHS4 Coexpression,1029;Enrichr Queries,790;ReMap ChIP-seq,27;GTEx Coexpression,938	TGFB1,ACSL1,EPHX2,HMGA1,PIPOX,KIF23,HSD17B6,ABCB11,YWHAZ,SLC7A1,AURKB,CYP39A1,AR,MARCKS,TACC3,LONP2,HAO1
gene_set_query	544	ZNF860	572	ARCHS4 Coexpression,731;GTEx Coexpression,413	SLC7A1,YWHAZ
gene_set_query	545	HES3	572.7	ARCHS4 Coexpression,426;Enrichr Queries,645;GTEx Coexpression,647	ILF3,HMGA1,PIPOX,AURKB
gene_set_query	546	KLF2	572.8	Literature ChIP-seq,156;ARCHS4 Coexpression,785;Enrichr Queries,1209;GTEx Coexpression,141	TGFB1,ABCA9,AURKB
gene_set_query	547	ZNF195	574.3	ARCHS4 Coexpression,577;Enrichr Queries,284;GTEx Coexpression,862	TGFB1,CKS2,KIF11,AURKB
gene_set_query	548	ZBTB12	574.7	ARCHS4 Coexpression,68;Enrichr Queries,101;GTEx Coexpression,1555	CDC20,ILF3,UBE2C,UBE2S,PLK1,HMGA1,MYBL2,SLC7A1,AURKB
gene_set_query	549	ZNF639	575.8	ARCHS4 Coexpression,348;Enrichr Queries,379;ReMap ChIP-seq,29;GTEx Coexpression,1547	CDC20,ILF3,TGFB1,ORC6,PLK1,HMGA1,TACC3,KIF2C,SLC27A5,AURKB
gene_set_query	550	ZNF23	576	ARCHS4 Coexpression,390;Enrichr Queries,320;GTEx Coexpression,1018	MARCKS,TGFB1,ACSL1,EPHX2,AURKB
gene_set_query	551	ZNF143	576.8	ARCHS4 Coexpression,1514;ENCODE ChIP-seq,38;Enrichr Queries,309;ReMap ChIP-seq,95;GTEx Coexpression,928	TGFB1,HMGA1,KIF11,YWHAZ,AURKB,CCNB1,TACC3,CKS2,LONP2,KIF2C,MLYCD,PEX11G,ACAA1,SLC27A2,SLC27A5
gene_set_query	552	ZNF26	577.7	ARCHS4 Coexpression,171;Enrichr Queries,1394;GTEx Coexpression,168	ORC6,CHEK1,ABCA9,CENPA,SLC27A5
gene_set_query	553	TPRX1	578	ARCHS4 Coexpression,63;Enrichr Queries,648;GTEx Coexpression,1023	CCNB1,ORC6,UBE2C,KIF2C,CENPA,AURKB,SULT2A1
gene_set_query	554	ZHX2	578.3	ARCHS4 Coexpression,1003;Enrichr Queries,421;ReMap ChIP-seq,131;GTEx Coexpression,758	DTYMK,MARCKS,AQP9,TACC3,AGXT,EFNA5,SLC27A5,AURKB
gene_set_query	555	SPIB	578.3	ARCHS4 Coexpression,693;Enrichr Queries,1366;ReMap ChIP-seq,61;GTEx Coexpression,193	ACSL1,ABCA6,ABCB4,MYBL2,KIF2C,HSD17B6,ABCB11,AURKB
gene_set_query	556	ZSCAN4	578.3	ARCHS4 Coexpression,192;Enrichr Queries,933;GTEx Coexpression,610	CCNB1,UBE2C,CENPA,AURKB
gene_set_query	557	SIX3	581	ARCHS4 Coexpression,149;Enrichr Queries,497;GTEx Coexpression,1097	UBE2C,EFNA5,CENPA,AURKB
gene_set_query	558	ZNF576	581	ARCHS4 Coexpression,483;Enrichr Queries,105;GTEx Coexpression,1155	ILF3,DTYMK,UBE2S,SNRPD1,CKS2,HMGA1,SLC7A1,AURKB
gene_set_query	559	HNF1B	581	ARCHS4 Coexpression,1090;Enrichr Queries,524;ReMap ChIP-seq,129	HMGA1,ACSL5,ABCB11,EFNA5,SLC27A2,AURKB
gene_set_query	560	KLF17	581.7	ARCHS4 Coexpression,95;Enrichr Queries,179;GTEx Coexpression,1471	CDC20,CCNB1,ORC6,UBE2C,KIF2C,AGXT,CENPA,AURKB
gene_set_query	561	PRDM5	581.8	Literature ChIP-seq,135;ARCHS4 Coexpression,626;Enrichr Queries,496;GTEx Coexpression,1070	MARCKS,ABCA9,CKS2,EFNA5,AURKB
gene_set_query	562	PAX9	585	ARCHS4 Coexpression,1052;Enrichr Queries,536;GTEx Coexpression,167	EFNA5,SLC7A1,AURKB,TICRR
gene_set_query	563	TERB1	588	ARCHS4 Coexpression,292;GTEx Coexpression,884	ABCA9,SLC27A5
gene_set_query	564	ZNF341	588.3	ARCHS4 Coexpression,891;Enrichr Queries,444;GTEx Coexpression,430	AQP9,HMGA1,MYBL2,AURKB,SLC27A5
gene_set_query	565	ZC3H8	589.3	ARCHS4 Coexpression,1432;Enrichr Queries,96;ReMap ChIP-seq,15;GTEx Coexpression,814	TGFB1,ACSL5,KIF11,CENPA,SLC7A1,AURKB,CDC20,CCNB1,UBE2S,CHEK1,CKS2,KIF2C
gene_set_query	566	PLSCR1	591	ARCHS4 Coexpression,504;GTEx Coexpression,678	ACSL1,AQP9
gene_set_query	567	ZSCAN5A	591	ARCHS4 Coexpression,347;Enrichr Queries,1078;GTEx Coexpression,348	ORC6,KIF2C,AURKB,SLC27A5
gene_set_query	568	SETDB2	592.7	ARCHS4 Coexpression,740;Enrichr Queries,818;GTEx Coexpression,220	ILF3,ACSL1,ABCA9,AURKB
gene_set_query	569	ZNF20	592.7	ARCHS4 Coexpression,849;Enrichr Queries,777;GTEx Coexpression,152	MARCKS,ORC6,TACC3,KIF2C,AURKB
gene_set_query	570	THYN1	594.5	ARCHS4 Coexpression,520;GTEx Coexpression,669	SNRPD1,CKS2
gene_set_query	571	FOXR1	595	ARCHS4 Coexpression,104;Enrichr Queries,881;GTEx Coexpression,800	CCNB1,UBE2C,PLK1,MYBL2,CENPA
gene_set_query	572	CENPT	595.7	ARCHS4 Coexpression,366;Enrichr Queries,16;GTEx Coexpression,1405	TGFB1,UBE2C,TROAP,PLK1,HMGA1,KIF23,KIF11,CENPA,AURKB,CDC20,CCNB2,CCNB1,DDX39A,CKS2,TACC3,MYBL2,KIF2C,GTSE1
gene_set_query	573	ZNF471	596	ARCHS4 Coexpression,322;Enrichr Queries,656;GTEx Coexpression,810	ABCA9,ABCA8,AURKB,SLC27A5
gene_set_query	574	ZFAT	596.7	ARCHS4 Coexpression,890;Enrichr Queries,796;GTEx Coexpression,104	ORC6,ABCA9,MYBL2,EFNA5,AURKB
gene_set_query	575	ZNF711	600	ARCHS4 Coexpression,151;Enrichr Queries,564;GTEx Coexpression,1085	MARCKS,KIF11,AURKB,TICRR
gene_set_query	576	FOXI3	600.5	ARCHS4 Coexpression,806;GTEx Coexpression,395	ORC6,EFNA5
gene_set_query	577	SMAD1	601.4	Literature ChIP-seq,93;ARCHS4 Coexpression,1322;Enrichr Queries,614;ReMap ChIP-seq,47;GTEx Coexpression,931	MARCKS,DDX39A,TGFB1,UBE2S,ACSL1,HMGA1,TACC3,MYBL2,ACAA1,AURKB
gene_set_query	578	ZEB1	602.2	ARCHS4 Coexpression,494;ENCODE ChIP-seq,65;Enrichr Queries,642;ReMap ChIP-seq,205;GTEx Coexpression,1605	MARCKS,DDX39A,EPHX2,CAT,HMGA1,TACC3,KIF23,ABCA8,AURKB
gene_set_query	579	HOXC9	602.5	Literature ChIP-seq,81;ARCHS4 Coexpression,421;Enrichr Queries,1017;GTEx Coexpression,891	DTYMK,ORC6,SCP2,UBE2S,SNRPD1,CAT,LONP2,GTSE1,CENPA,AURKB
gene_set_query	580	HOXC13	603	ARCHS4 Coexpression,513;Enrichr Queries,943;GTEx Coexpression,353	UBE2S,MYBL2,EFNA5,AURKB
gene_set_query	581	ZNF286B	603	ARCHS4 Coexpression,657;GTEx Coexpression,549	MARCKS
gene_set_query	582	ZFP41	603	ARCHS4 Coexpression,694;Enrichr Queries,251;GTEx Coexpression,864	ILF3,PLK1,MYBL2,GTSE1,AURKB
gene_set_query	583	TSHZ1	603.7	ARCHS4 Coexpression,636;Enrichr Queries,643;GTEx Coexpression,532	SNRPD1,EFNA5,AURKB
gene_set_query	584	ONECUT3	603.7	ARCHS4 Coexpression,812;Enrichr Queries,545;GTEx Coexpression,454	DDX39A,EFNA5,AURKB,SLC27A5
gene_set_query	585	ONECUT2	604.3	ARCHS4 Coexpression,1191;Enrichr Queries,584;GTEx Coexpression,38	SLC10A1,PIPOX,HSD17B6,BAAT,EFNA5,CYP8B1,AURKB,CYP27A1,SCP2,HAO1,ACAA1,AGXT,ALDH8A1,SLC27A5
gene_set_query	586	FOS	605	ARCHS4 Coexpression,1289;ENCODE ChIP-seq,5;Enrichr Queries,1208;ReMap ChIP-seq,203;GTEx Coexpression,320	ACSL1,UBE2C,TROAP,HMGA1,EFNA5,ABCB11,CENPA,AURKB,CDC20,CCNB2,ILF3,CCNB1,DDX39A,ORC6,UBE2S,CAT,CKS2
gene_set_query	587	PRDM1	605	ARCHS4 Coexpression,1282;ENCODE ChIP-seq,113;Enrichr Queries,589;ReMap ChIP-seq,273;GTEx Coexpression,768	MARCKS,CKS2,ACSL5,AURKB
gene_set_query	588	CXXC4	605.3	ARCHS4 Coexpression,528;ReMap ChIP-seq,69;GTEx Coexpression,1219	CDC20,MARCKS,TROAP,EFNA5,YWHAZ,AURKB
gene_set_query	589	EGR1	605.5	Literature ChIP-seq,73;ARCHS4 Coexpression,767;ENCODE ChIP-seq,33;Enrichr Queries,1098;ReMap ChIP-seq,118;GTEx Coexpression,1544	TGFB1,SLC10A1,TROAP,ABCB4,AQP9,HMGA1,KIF11,CENPA,AURKB,ILF3,CCNB1,MARCKS,SNRPD1,LONP2,HAO1,ACAA1
gene_set_query	590	ZNF264	605.7	ARCHS4 Coexpression,319;Enrichr Queries,399;GTEx Coexpression,1099	MARCKS,ABCA9,YWHAZ,AURKB,SLC27A5
gene_set_query	591	ZGPAT	606.7	ARCHS4 Coexpression,411;Enrichr Queries,1372;GTEx Coexpression,37	TGFB1,SLC10A1,NR1I2,PIPOX,HSD17B6,BAAT,CYP8B1,AURKB,CYP27A1,HAO1,ACAA1,AGXT,ALDH8A1,SLC27A5
gene_set_query	592	TBXT	607	ARCHS4 Coexpression,1196;Enrichr Queries,855;ReMap ChIP-seq,274;GTEx Coexpression,103	ORC6,TGFB1,MYBL2,AURKB
gene_set_query	593	ZNF652	607.5	Literature ChIP-seq,155;ARCHS4 Coexpression,1169;Enrichr Queries,350;GTEx Coexpression,756	MARCKS,YWHAZ,AURKB
gene_set_query	594	ZNF729	608	ARCHS4 Coexpression,105;GTEx Coexpression,1111	ORC6,MYBL2,CENPA,TICRR
gene_set_query	595	DMRT1	608	Literature ChIP-seq,25;ARCHS4 Coexpression,1119;Enrichr Queries,258;GTEx Coexpression,1030	MARCKS,LONP2,MYBL2,SLC27A2,AURKB
gene_set_query	596	ZNF33A	608.3	ARCHS4 Coexpression,613;Enrichr Queries,997;GTEx Coexpression,215	UBE2S,AURKB
gene_set_query	597	THAP1	608.4	ARCHS4 Coexpression,1245;ENCODE ChIP-seq,105;Enrichr Queries,627;ReMap ChIP-seq,178;GTEx Coexpression,887	ILF3,CCNB1,DDX39A,UBE2S,TACC3,YWHAZ,SLC27A5,AURKB
gene_set_query	598	MEF2C	609.4	ARCHS4 Coexpression,1360;ENCODE ChIP-seq,36;Enrichr Queries,492;ReMap ChIP-seq,123;GTEx Coexpression,1036	MARCKS,ACSL1,ABCB4,CKS2,HMGA1,KIF2C,AURKB
gene_set_query	599	LTF	610.5	ARCHS4 Coexpression,942;GTEx Coexpression,279	TGFB1,CAT
gene_set_query	600	RFX1	610.5	ARCHS4 Coexpression,869;Enrichr Queries,390;ReMap ChIP-seq,39;GTEx Coexpression,1144	CCNB1,ILF3,TGFB1,CAT,HMGA1,AGXT,SLC27A5,AURKB,RHNO1
gene_set_query	601	EOMES	610.6	Literature ChIP-seq,70;ARCHS4 Coexpression,1227;Enrichr Queries,1108;ReMap ChIP-seq,182;GTEx Coexpression,466	MARCKS,TGFB1,DDX39A,CKS2,PIPOX,KIF11,ABCB11,CYP8B1,YWHAZ,SLC7A1,AURKB
gene_set_query	602	POGK	612	ARCHS4 Coexpression,186;Enrichr Queries,192;GTEx Coexpression,1458	MARCKS,ILF3,YWHAZ,SLC7A1,AURKB,TICRR
gene_set_query	603	LMX1B	612.7	ARCHS4 Coexpression,853;Enrichr Queries,530;GTEx Coexpression,455	EFNA5,AURKB,SLC27A5
gene_set_query	604	ELF5	613.4	Literature ChIP-seq,136;ARCHS4 Coexpression,1530;Enrichr Queries,598;ReMap ChIP-seq,290;GTEx Coexpression,513	ACSL1,KIF11,EFNA5,GTSE1,AURKB
gene_set_query	605	ALX1	614	ARCHS4 Coexpression,212;Enrichr Queries,504;GTEx Coexpression,1126	CDC20,DTYMK,EFNA5,AURKB
gene_set_query	606	NFIC	614.2	ARCHS4 Coexpression,1479;ENCODE ChIP-seq,42;Enrichr Queries,289;ReMap ChIP-seq,122;GTEx Coexpression,1139	MARCKS,DTYMK,ACSL1,PLK1,HMGA1,LONP2,PIPOX,KIF11,GTSE1,AURKB,SULT2A1
gene_set_query	607	ZNF625	614.3	ARCHS4 Coexpression,675;Enrichr Queries,1090;GTEx Coexpression,78	SNRPD1,CHEK1,KIF23,KIF11,CENPA,AURKB
gene_set_query	608	EBF3	614.7	ARCHS4 Coexpression,1113;Enrichr Queries,622;GTEx Coexpression,109	ABCA6,ABCA9,ABCA8,EFNA5,AURKB
gene_set_query	609	MXI1	614.8	ARCHS4 Coexpression,1442;ENCODE ChIP-seq,27;Enrichr Queries,126;ReMap ChIP-seq,102;GTEx Coexpression,1377	DTYMK,TGFB1,ACSL1,TROAP,PLK1,HMGA1,YWHAZ,AURKB,MARCKS,DDX39A,ORC6,SNRPD1,CAT,TACC3,CKS2,KIF2C,SLC27A5
gene_set_query	610	ZFP64	615.3	ARCHS4 Coexpression,1532;Enrichr Queries,235;GTEx Coexpression,79	CHEK1,HMGA1,MYBL2,KIF11,EFNA5,CENPA,AURKB,RHNO1
gene_set_query	611	SOX9	615.8	Literature ChIP-seq,49;ARCHS4 Coexpression,803;Enrichr Queries,678;ReMap ChIP-seq,75;GTEx Coexpression,1474	CYP39A1,MARCKS,UBE2S,HMGA1,TACC3,ABCB11,SLC27A5,AURKB
gene_set_query	612	JDP2	618	ARCHS4 Coexpression,517;Enrichr Queries,662;GTEx Coexpression,675	TGFB1,ACSL1,SLC7A1,AURKB
gene_set_query	613	MYOG	618.8	ARCHS4 Coexpression,1241;ENCODE ChIP-seq,93;Enrichr Queries,326;GTEx Coexpression,815	HMGA1,AGXT,AURKB,RHNO1
gene_set_query	614	SNAI1	619	ARCHS4 Coexpression,441;Enrichr Queries,294;GTEx Coexpression,1122	TGFB1,UBE2C,HMGA1,CKS2,AURKB
gene_set_query	615	ZXDB	620	ARCHS4 Coexpression,579;Enrichr Queries,1220;GTEx Coexpression,61	CYP39A1,ABCB4,BAAT,AGXT,ALDH8A1,CYP8B1,SLC27A2,AURKB
gene_set_query	616	ZNF771	620.7	ARCHS4 Coexpression,429;Enrichr Queries,260;GTEx Coexpression,1173	SNRPD1,PLK1,KIF11,AURKB,SLC27A5
gene_set_query	617	ATOH8	621	ARCHS4 Coexpression,619;Enrichr Queries,1052;GTEx Coexpression,192	ABCA6,ABCA8,YWHAZ,AURKB
gene_set_query	618	HIVEP3	621.3	ARCHS4 Coexpression,832;Enrichr Queries,742;GTEx Coexpression,290	TGFB1,EFNA5,AURKB
gene_set_query	619	NR2C2	621.6	ARCHS4 Coexpression,871;ENCODE ChIP-seq,114;Enrichr Queries,1259;ReMap ChIP-seq,92;GTEx Coexpression,772	ILF3,TACC3,PIPOX,HSD17B6,CENPA,SLC27A5,AURKB
gene_set_query	620	HIF3A	622	ARCHS4 Coexpression,973;Enrichr Queries,595;GTEx Coexpression,298	ABCA6,HMGA1,AGXT,AURKB
gene_set_query	621	NFE2L3	622	ARCHS4 Coexpression,239;Enrichr Queries,355;GTEx Coexpression,1272	CKS2,HMGA1,MYBL2,KIF11,AURKB,TICRR
gene_set_query	622	RFX4	622.3	ARCHS4 Coexpression,836;Enrichr Queries,277;GTEx Coexpression,754	MARCKS,PIPOX,EFNA5,AURKB
gene_set_query	623	CIC	623	ARCHS4 Coexpression,620;Enrichr Queries,437;GTEx Coexpression,812	MARCKS,TGFB1,HMGA1,AURKB
gene_set_query	624	ATF4	623	ARCHS4 Coexpression,213;Enrichr Queries,1112;ReMap ChIP-seq,5;GTEx Coexpression,1162	CYP27A1,MARCKS,ILF3,ACSL1,SLC10A1,ABCB4,CAT,CKS2,MYBL2,AGXT,SLC7A1,YWHAZ
gene_set_query	625	TGIF1	624	ARCHS4 Coexpression,665;Enrichr Queries,376;GTEx Coexpression,831	MARCKS,HMGA1,CKS2,AURKB
gene_set_query	626	BRF2	626.3	ARCHS4 Coexpression,1213;ReMap ChIP-seq,110;GTEx Coexpression,556	DDX39A,SNRPD1,MYBL2,AURKB
gene_set_query	627	ARID5A	626.5	ARCHS4 Coexpression,866;GTEx Coexpression,387	TGFB1
gene_set_query	628	GATA4	626.6	Literature ChIP-seq,80;ARCHS4 Coexpression,1614;Enrichr Queries,983;ReMap ChIP-seq,145;GTEx Coexpression,311	CDC20,MARCKS,DTYMK,ACSL1,MYBL2,KIF2C,MLYCD,ACAA1,YWHAZ,SLC7A1,AURKB
gene_set_query	629	ZNF141	627	ARCHS4 Coexpression,564;Enrichr Queries,406;GTEx Coexpression,911	CKS2,ABCA9,KIF11,AURKB
gene_set_query	630	ARNTL	627	ARCHS4 Coexpression,1298;Enrichr Queries,985;ReMap ChIP-seq,79;GTEx Coexpression,146	ACSL1,AQP9,CKS2,MYBL2,ABCA8,CENPA,AURKB
gene_set_query	631	HOXA6	627.3	ARCHS4 Coexpression,172;Enrichr Queries,931;GTEx Coexpression,779	ILF3,CAT,AURKB,TICRR
gene_set_query	632	ZNF608	628.7	ARCHS4 Coexpression,1115;Enrichr Queries,274;GTEx Coexpression,497	MARCKS,EFNA5,AURKB
gene_set_query	633	ZNF823	628.7	ARCHS4 Coexpression,581;Enrichr Queries,425;GTEx Coexpression,880	MARCKS,CKS2,KIF11,AURKB
gene_set_query	634	ZNF750	628.8	ARCHS4 Coexpression,1150;Enrichr Queries,731;ReMap ChIP-seq,55;GTEx Coexpression,579	CDC20,ILF3,TGFB1,HMGA1,TACC3,PEX11G,AURKB
gene_set_query	635	HOMEZ	629.3	ARCHS4 Coexpression,1247;Enrichr Queries,405;GTEx Coexpression,236	ACSL1,KIF2C,MYBL2,AURKB
gene_set_query	636	NFXL1	630.3	ARCHS4 Coexpression,1389;Enrichr Queries,419;GTEx Coexpression,83	CCNB2,MARCKS,CHEK1,CKS2,TACC3,SLC7A1,AURKB
gene_set_query	637	XBP1	631	ARCHS4 Coexpression,1129;Enrichr Queries,738;ReMap ChIP-seq,35;GTEx Coexpression,622	CYP39A1,DDX39A,UBE2C,HMGA1,MYBL2,YWHAZ,AURKB
gene_set_query	638	AEBP2	632.3	ARCHS4 Coexpression,563;Enrichr Queries,281;GTEx Coexpression,1053	MARCKS,YWHAZ,AURKB
gene_set_query	639	ZNF385A	633	ARCHS4 Coexpression,375;Enrichr Queries,771;GTEx Coexpression,753	CYP27A1,TGFB1,AURKB
gene_set_query	640	HAND1	633	ARCHS4 Coexpression,453;Enrichr Queries,915;GTEx Coexpression,531	UBE2S,MYBL2,AURKB
gene_set_query	641	BCL11B	633	Literature ChIP-seq,161;ARCHS4 Coexpression,1403;Enrichr Queries,327;GTEx Coexpression,641	MARCKS,EFNA5,AURKB
gene_set_query	642	ZBTB3	636	ARCHS4 Coexpression,920;Enrichr Queries,609;GTEx Coexpression,379	AQP9,HMGA1,AURKB,SLC27A5
gene_set_query	643	ZNF680	638.3	ARCHS4 Coexpression,590;Enrichr Queries,213;GTEx Coexpression,1112	CCNB1,TGFB1,CKS2,KIF11,AURKB
gene_set_query	644	TFAP2B	639	ARCHS4 Coexpression,927;Enrichr Queries,511;GTEx Coexpression,479	EFNA5,PEX11G,AURKB
gene_set_query	645	ZNF439	640.3	ARCHS4 Coexpression,728;Enrichr Queries,930;GTEx Coexpression,263	ILF3,ABCA9,AURKB
gene_set_query	646	JUNB	641	ARCHS4 Coexpression,698;Enrichr Queries,694;ReMap ChIP-seq,242;GTEx Coexpression,930	TGFB1,ACSL1,HMGA1,AURKB
gene_set_query	647	HOXD4	641.3	ARCHS4 Coexpression,734;Enrichr Queries,929;GTEx Coexpression,261	AR,ILF3,AURKB
gene_set_query	648	ZNF682	643	ARCHS4 Coexpression,574;Enrichr Queries,166;GTEx Coexpression,1189	MARCKS,ORC6,CKS2,KIF11,AURKB
gene_set_query	649	SMYD3	643.5	ARCHS4 Coexpression,681;GTEx Coexpression,606	DTYMK
gene_set_query	650	ELK4	644.2	ARCHS4 Coexpression,1371;ENCODE ChIP-seq,86;Enrichr Queries,749;ReMap ChIP-seq,66;GTEx Coexpression,949	DTYMK,SNRPD1,CKS2,LONP2,KIF2C,ACAA1,YWHAZ,SLC27A5,AURKB
gene_set_query	651	ZNF614	645	ARCHS4 Coexpression,145;GTEx Coexpression,1145	AR,TGFB1,CHEK1
gene_set_query	652	SALL3	645	ARCHS4 Coexpression,166;Enrichr Queries,276;GTEx Coexpression,1493	MARCKS,CHEK1,CKS2,PIPOX,EFNA5,AURKB
gene_set_query	653	ZNF302	645.3	ARCHS4 Coexpression,949;Enrichr Queries,590;GTEx Coexpression,397	MARCKS,TGFB1,EFNA5,AURKB
gene_set_query	654	ZNF85	645.3	ARCHS4 Coexpression,1574;Enrichr Queries,25;GTEx Coexpression,337	UBE2C,PLK1,KIF23,KIF11,CENPA,AURKB,CDC20,CCNB2,CCNB1,ORC6,CHEK1,CKS2,TACC3,KIF2C,MYBL2
gene_set_query	655	IRF8	645.8	Literature ChIP-seq,39;ARCHS4 Coexpression,1180;Enrichr Queries,938;GTEx Coexpression,426	MARCKS,ACSL5,MYBL2,CENPA,AURKB
gene_set_query	656	FOXB1	647	ARCHS4 Coexpression,249;Enrichr Queries,455;GTEx Coexpression,1237	SNRPD1,CKS2,EFNA5,GTSE1,AURKB
gene_set_query	657	ZNF165	647.3	ARCHS4 Coexpression,826;Enrichr Queries,73;ReMap ChIP-seq,291;GTEx Coexpression,1399	CDC20,CCNB1,CKS2,KIF23,KIF2C,KIF11,SLC27A2,YWHAZ,AURKB
gene_set_query	658	NEUROG2	647.7	ARCHS4 Coexpression,1349;Enrichr Queries,475;GTEx Coexpression,119	ORC6,MYBL2,EFNA5,AURKB
gene_set_query	659	IRX5	648	ARCHS4 Coexpression,1149;Enrichr Queries,351;GTEx Coexpression,444	MARCKS,EFNA5,AURKB
gene_set_query	660	ZBED1	648.8	ARCHS4 Coexpression,814;Enrichr Queries,253;ReMap ChIP-seq,16;GTEx Coexpression,1512	MARCKS,DDX39A,TGFB1,CKS2,HMGA1,KIF2C,YWHAZ,SLC27A5,AURKB
gene_set_query	661	SOHLH2	649.3	ARCHS4 Coexpression,162;Enrichr Queries,352;GTEx Coexpression,1434	CCNB1,CHEK1,MYBL2,SLC27A2,AURKB,TICRR
gene_set_query	662	GTF2IRD2	650	ARCHS4 Coexpression,316;Enrichr Queries,1337;GTEx Coexpression,297	ABCA9,YWHAZ,AURKB,SLC27A5
gene_set_query	663	MAFG	650	ARCHS4 Coexpression,1007;Enrichr Queries,191;ReMap ChIP-seq,70;GTEx Coexpression,1332	MARCKS,AQP9,CAT,HMGA1,ABCB11,SLC27A2,YWHAZ,SLC7A1,AURKB
gene_set_query	664	IRF5	650.3	ARCHS4 Coexpression,947;Enrichr Queries,816;GTEx Coexpression,188	TGFB1,MYBL2,AURKB
gene_set_query	665	REPIN1	651.3	ARCHS4 Coexpression,710;Enrichr Queries,187;GTEx Coexpression,1057	MARCKS,ILF3,HMGA1,YWHAZ,AURKB
gene_set_query	666	SP5	651.3	ARCHS4 Coexpression,795;Enrichr Queries,331;GTEx Coexpression,828	PIPOX,EFNA5,SLC27A2,AURKB
gene_set_query	667	NEUROD1	652.3	ARCHS4 Coexpression,1244;Enrichr Queries,571;ReMap ChIP-seq,154;GTEx Coexpression,640	DDX39A,TGFB1,HMGA1,EFNA5,AURKB
gene_set_query	668	DR1	652.3	ARCHS4 Coexpression,1603;Enrichr Queries,238;GTEx Coexpression,116	CCNB2,MARCKS,TROAP,HMGA1,KIF11,YWHAZ,AURKB
gene_set_query	669	HLF	652.3	ARCHS4 Coexpression,342;Enrichr Queries,565;GTEx Coexpression,1050	EPHX2,PIPOX,AURKB,SULT2A1
gene_set_query	670	ZNF580	653	ARCHS4 Coexpression,325;Enrichr Queries,185;GTEx Coexpression,1449	TGFB1,UBE2S,HMGA1,AURKB
gene_set_query	671	SIX5	653.2	ARCHS4 Coexpression,485;ENCODE ChIP-seq,107;Enrichr Queries,1059;ReMap ChIP-seq,195;GTEx Coexpression,1420	CYP39A1,ILF3,TGFB1,TACC3,HMGA1,GTSE1,SLC27A5,AURKB
gene_set_query	672	PBX1	653.8	Literature ChIP-seq,90;ARCHS4 Coexpression,1132;Enrichr Queries,286;GTEx Coexpression,1107	AR,CCNB2,MARCKS,NR1I2,ACSL5,HAO1,EFNA5,AGXT,CENPA,AURKB
gene_set_query	673	ZNF709	654.3	ARCHS4 Coexpression,321;Enrichr Queries,1364;GTEx Coexpression,278	MARCKS,KIF2C,EFNA5,AURKB
gene_set_query	674	ZBTB49	654.5	ARCHS4 Coexpression,305;GTEx Coexpression,1004	AQP9,TACC3
gene_set_query	675	LCORL	656	ARCHS4 Coexpression,1465;Enrichr Queries,432;GTEx Coexpression,71	MARCKS,UBE2C,CHEK1,KIF11,EFNA5,CENPA,AURKB
gene_set_query	676	SP4	656.4	ARCHS4 Coexpression,1457;ENCODE ChIP-seq,94;Enrichr Queries,727;ReMap ChIP-seq,94;GTEx Coexpression,910	ILF3,MARCKS,DDX39A,HMGA1,KIF2C,PEX11G,ACAA1,SLC27A5,AURKB
gene_set_query	677	SOX6	656.5	ARCHS4 Coexpression,358;Enrichr Queries,718;ReMap ChIP-seq,60;GTEx Coexpression,1490	MARCKS,DDX39A,HMGA1,ABCA9,PEX11G,ABCB11,EFNA5,AURKB
gene_set_query	678	BATF	656.8	ARCHS4 Coexpression,1134;ENCODE ChIP-seq,116;Enrichr Queries,1343;ReMap ChIP-seq,241;GTEx Coexpression,450	ACSL1,TACC3,AURKB
gene_set_query	679	BACH2	658.5	ARCHS4 Coexpression,1099;Enrichr Queries,585;ReMap ChIP-seq,189;GTEx Coexpression,761	CYP39A1,HMGA1,KIF2C,EFNA5,AURKB
gene_set_query	680	THAP2	658.7	ARCHS4 Coexpression,606;Enrichr Queries,338;GTEx Coexpression,1032	MARCKS,CKS2,TACC3,AURKB
gene_set_query	681	ZNF350	659	ARCHS4 Coexpression,1257;Enrichr Queries,268;GTEx Coexpression,452	MARCKS,ACSL1,AQP9,AURKB
gene_set_query	682	GPBP1	659.5	ARCHS4 Coexpression,725;GTEx Coexpression,594	MARCKS
gene_set_query	683	ZNF285	659.5	ARCHS4 Coexpression,634;GTEx Coexpression,685	ABCA9
gene_set_query	684	POU3F1	659.8	Literature ChIP-seq,89;ARCHS4 Coexpression,1212;Enrichr Queries,479;GTEx Coexpression,859	ORC6,ABCA6,TROAP,HMGA1,KIF2C,EFNA5,AURKB
gene_set_query	685	TIGD5	661	ARCHS4 Coexpression,662;Enrichr Queries,149;GTEx Coexpression,1172	CDC20,UBE2S,HMGA1,TACC3,AURKB
gene_set_query	686	ZNF10	661	ARCHS4 Coexpression,663;Enrichr Queries,1060;GTEx Coexpression,260	ILF3,MARCKS,AURKB
gene_set_query	687	ZFP69	661.5	ARCHS4 Coexpression,1098;GTEx Coexpression,225	CHEK1
gene_set_query	688	ZNF830	661.7	ARCHS4 Coexpression,355;Enrichr Queries,221;GTEx Coexpression,1409	ILF3,ORC6,SNRPD1,CAT,CKS2,AURKB
gene_set_query	689	ZFPM1	662	ARCHS4 Coexpression,353;Enrichr Queries,794;GTEx Coexpression,839	TGFB1,UBE2S,AURKB
gene_set_query	690	PURB	662.5	ARCHS4 Coexpression,431;GTEx Coexpression,894	ILF3,SLC7A1
gene_set_query	691	ZNF19	664	ARCHS4 Coexpression,300;Enrichr Queries,1067;GTEx Coexpression,625	ABCA9,AURKB,SLC27A5
gene_set_query	692	KCMF1	665.3	ARCHS4 Coexpression,233;Enrichr Queries,224;GTEx Coexpression,1539	UBE2S,HMGA1,YWHAZ,SLC7A1,AURKB
gene_set_query	693	DUX4	665.5	ARCHS4 Coexpression,1060;ReMap ChIP-seq,271	MARCKS
gene_set_query	694	FOXC1	666	ARCHS4 Coexpression,77;Enrichr Queries,343;GTEx Coexpression,1578	MARCKS,ILF3,UBE2S,MYBL2,EFNA5,SLC7A1,AURKB,TICRR
gene_set_query	695	SP110	666.3	ARCHS4 Coexpression,727;Enrichr Queries,872;GTEx Coexpression,400	TGFB1,AQP9,AURKB
gene_set_query	696	NR4A1	667	ARCHS4 Coexpression,1372;Enrichr Queries,1149;ReMap ChIP-seq,49;GTEx Coexpression,98	DDX39A,TGFB1,ABCA6,ACSL1,CAT,ABCA9,HMGA1,KIF2C,ABCA8,AURKB
gene_set_query	697	OTX1	667.3	ARCHS4 Coexpression,525;Enrichr Queries,474;GTEx Coexpression,1003	CCNB2,MARCKS,EFNA5,AURKB
gene_set_query	698	ZNF396	667.7	ARCHS4 Coexpression,362;Enrichr Queries,1196;GTEx Coexpression,445	AQP9,ABCA9,AURKB,SLC27A5
gene_set_query	699	ZFP14	668.3	ARCHS4 Coexpression,774;Enrichr Queries,354;GTEx Coexpression,877	EPHX2,ABCA9,EFNA5,AURKB
gene_set_query	700	IRF9	669	ARCHS4 Coexpression,432;Enrichr Queries,862;ReMap ChIP-seq,177;GTEx Coexpression,1205	TGFB1,AQP9,KIF2C,CENPA,AURKB
gene_set_query	701	MLXIP	669.3	ARCHS4 Coexpression,670;Enrichr Queries,786;GTEx Coexpression,552	TGFB1,SLC7A1,AURKB
gene_set_query	702	TCF24	670	ARCHS4 Coexpression,1312;Enrichr Queries,335;GTEx Coexpression,363	PIPOX,MLYCD,SLC27A2,AURKB
gene_set_query	703	ZNF662	671.7	ARCHS4 Coexpression,587;Enrichr Queries,886;GTEx Coexpression,542	ABCA9,AURKB
gene_set_query	704	ZNF273	672	ARCHS4 Coexpression,1420;Enrichr Queries,19;GTEx Coexpression,577	UBE2C,PLK1,KIF23,KIF11,CENPA,AURKB,TICRR,CDC20,CCNB2,CCNB1,ORC6,UBE2S,CHEK1,CKS2,MYBL2,KIF2C,GTSE1
gene_set_query	705	ZNF613	672.3	ARCHS4 Coexpression,596;Enrichr Queries,797;GTEx Coexpression,624	MLYCD,SLC27A2,AURKB
gene_set_query	706	EBF2	673	ARCHS4 Coexpression,1236;GTEx Coexpression,110	ABCA6,ABCA9,ABCA8
gene_set_query	707	KLF8	676	ARCHS4 Coexpression,178;Enrichr Queries,1066;GTEx Coexpression,784	ABCA6,ABCA9,AURKB,SLC27A5
gene_set_query	708	MESP1	676.7	ARCHS4 Coexpression,386;Enrichr Queries,508;GTEx Coexpression,1136	AR,UBE2S,SLC27A2,AURKB
gene_set_query	709	ZNF197	677.3	ARCHS4 Coexpression,603;Enrichr Queries,987;ReMap ChIP-seq,180;GTEx Coexpression,939	TGFB1,UBE2S,PIPOX,KIF2C,AURKB
gene_set_query	710	FOXJ2	678	ARCHS4 Coexpression,374;Enrichr Queries,1330;ReMap ChIP-seq,106;GTEx Coexpression,902	ILF3,CCNB1,TGFB1,SNRPD1,BAAT,AURKB,SULT2A1
gene_set_query	711	ZKSCAN5	678.3	ARCHS4 Coexpression,630;Enrichr Queries,282;GTEx Coexpression,1123	ACSL1,CHEK1,YWHAZ,AURKB
gene_set_query	712	ZNF556	678.7	ARCHS4 Coexpression,150;Enrichr Queries,1013;GTEx Coexpression,873	ORC6,ABCA9,AURKB,SLC27A5
gene_set_query	713	TLX1	679	ARCHS4 Coexpression,473;Enrichr Queries,861;GTEx Coexpression,703	NR1I2,MYBL2,AURKB
gene_set_query	714	PREB	679	ARCHS4 Coexpression,840;Enrichr Queries,249;GTEx Coexpression,948	CDC20,ACSL1,HMGA1,MYBL2,AURKB
gene_set_query	715	ZNF419	679.3	ARCHS4 Coexpression,331;Enrichr Queries,574;GTEx Coexpression,1133	MARCKS,ABCA9,AURKB,SLC27A5
gene_set_query	716	ZNF177	679.3	ARCHS4 Coexpression,394;Enrichr Queries,538;GTEx Coexpression,1106	MARCKS,EFNA5,SLC27A2,AURKB
gene_set_query	717	ZNF319	679.7	ARCHS4 Coexpression,324;Enrichr Queries,1354;GTEx Coexpression,361	TGFB1,AQP9,AURKB
gene_set_query	718	CREM	680	Literature ChIP-seq,33;ARCHS4 Coexpression,1270;Enrichr Queries,570;ReMap ChIP-seq,134;GTEx Coexpression,1393	DTYMK,TGFB1,ACSL1,UBE2C,TROAP,HMGA1,KIF23,KIF11,EFNA5,YWHAZ,SLC7A1,AURKB,CDC20,CCNB2,ILF3,MARCKS,DDX39A,UBE2S,CHEK1,CKS2,TACC3,MYBL2,KIF2C,MLYCD
gene_set_query	719	ZNF577	680.3	ARCHS4 Coexpression,666;Enrichr Queries,1102;GTEx Coexpression,273	ILF3,ABCA9,AURKB
gene_set_query	720	ZNF678	680.7	ARCHS4 Coexpression,615;Enrichr Queries,789;GTEx Coexpression,638	KIF11,AURKB
gene_set_query	721	ZNF76	681.3	ARCHS4 Coexpression,1451;Enrichr Queries,389;GTEx Coexpression,204	ILF3,HMGA1,MYBL2,AURKB
gene_set_query	722	CDX1	681.7	ARCHS4 Coexpression,498;Enrichr Queries,1125;GTEx Coexpression,422	NR1I2,ACSL5,AURKB
gene_set_query	723	ZFP3	681.7	ARCHS4 Coexpression,221;Enrichr Queries,697;GTEx Coexpression,1127	CDC20,ACSL1,UBE2S,HMGA1,AURKB
gene_set_query	724	SALL2	682	ARCHS4 Coexpression,405;Enrichr Queries,1061;GTEx Coexpression,580	ILF3,HMGA1,AURKB
gene_set_query	725	SOX12	684.3	ARCHS4 Coexpression,399;Enrichr Queries,111;GTEx Coexpression,1543	MARCKS,ILF3,UBE2S,PLK1,HMGA1,MYBL2,SLC7A1,AURKB
gene_set_query	726	ZNF70	684.7	ARCHS4 Coexpression,156;Enrichr Queries,1289;GTEx Coexpression,609	ORC6,ABCA9,AURKB,SLC27A5
gene_set_query	727	ZNF655	685.3	ARCHS4 Coexpression,1427;Enrichr Queries,308;GTEx Coexpression,321	ILF3,HMGA1,YWHAZ,AURKB
gene_set_query	728	OVOL2	686.3	ARCHS4 Coexpression,1073;Enrichr Queries,558;ReMap ChIP-seq,295;GTEx Coexpression,819	SLC27A2,AURKB
gene_set_query	729	ZNF641	686.3	ARCHS4 Coexpression,851;Enrichr Queries,924;GTEx Coexpression,284	AQP9,AURKB
gene_set_query	730	ZNF493	687	ARCHS4 Coexpression,350;Enrichr Queries,1011;GTEx Coexpression,700	ABCA9,AURKB,SLC27A5
gene_set_query	731	ZNF566	687	ARCHS4 Coexpression,783;Enrichr Queries,680;GTEx Coexpression,598	CKS2,ABCA9,AURKB
gene_set_query	732	IRX2	687.3	ARCHS4 Coexpression,1174;Enrichr Queries,515;GTEx Coexpression,373	EFNA5,AURKB
gene_set_query	733	DEAF1	687.8	ARCHS4 Coexpression,1601;Enrichr Queries,304;ReMap ChIP-seq,119;GTEx Coexpression,727	DDX39A,TGFB1,HMGA1,KIF2C,SLC27A5,AURKB
gene_set_query	734	TP63	688	Literature ChIP-seq,134;ARCHS4 Coexpression,1232;Enrichr Queries,1092;ReMap ChIP-seq,284;GTEx Coexpression,698	ACSL1,AQP9,BAAT,ABCB11,EFNA5,YWHAZ,SLC27A2,AURKB
gene_set_query	735	TBX21	688.5	ARCHS4 Coexpression,766;Enrichr Queries,1379;ReMap ChIP-seq,150;GTEx Coexpression,459	TGFB1,DDX39A,YWHAZ,AURKB
gene_set_query	736	ZNF326	688.7	ARCHS4 Coexpression,754;Enrichr Queries,436;GTEx Coexpression,876	ILF3,SNRPD1,YWHAZ,AURKB
gene_set_query	737	ATF6	688.7	ARCHS4 Coexpression,856;Enrichr Queries,822;GTEx Coexpression,388	AQP9,CAT,LONP2,AURKB
gene_set_query	738	ZNF426	689.7	ARCHS4 Coexpression,650;Enrichr Queries,1234;GTEx Coexpression,185	ABCA9,SLC7A1,AURKB,TICRR
gene_set_query	739	ADNP2	690	ARCHS4 Coexpression,52;Enrichr Queries,760;GTEx Coexpression,1258	ILF3,MYBL2,KIF23,KIF2C,KIF11,SLC7A1,AURKB,TICRR
gene_set_query	740	TIGD1	691	ARCHS4 Coexpression,168;GTEx Coexpression,1214	ABCA6,ABCA9,SLC27A5
gene_set_query	741	ZFX	692.8	Literature ChIP-seq,21;ARCHS4 Coexpression,1606;Enrichr Queries,1380;ReMap ChIP-seq,17;GTEx Coexpression,440	ABCB4,HMGA1,KIF23,KIF11,AURKB,CDC20,AR,CCNB2,ILF3,DDX39A,ORC6,SNRPD1,UBE2S,TACC3,CKS2,LONP2,MYBL2,MLYCD,ACAA1,SLC27A2,RHNO1
gene_set_query	742	ZNF219	693.3	ARCHS4 Coexpression,406;Enrichr Queries,687;GTEx Coexpression,987	ILF3,HMGA1,AURKB
gene_set_query	743	ETV3L	695.3	ARCHS4 Coexpression,887;Enrichr Queries,1127;GTEx Coexpression,72	ORC6,SNRPD1,AQP9,MYBL2,CENPA,AURKB
gene_set_query	744	ZNF563	695.3	ARCHS4 Coexpression,1210;Enrichr Queries,657;GTEx Coexpression,219	EPHX2,KIF2C,AURKB
gene_set_query	745	ZNF385D	696	ARCHS4 Coexpression,691;Enrichr Queries,809;GTEx Coexpression,588	ABCA9,EFNA5,AURKB
gene_set_query	746	PRDM9	696.3	ARCHS4 Coexpression,103;Enrichr Queries,785;GTEx Coexpression,1201	MYBL2,KIF11,EFNA5,SLC7A1,AURKB,TICRR
gene_set_query	747	PKNOX1	696.5	ARCHS4 Coexpression,1011;Enrichr Queries,741;ReMap ChIP-seq,63;GTEx Coexpression,971	DDX39A,TGFB1,HMGA1,PEX11G,YWHAZ,AURKB,SLC27A5
gene_set_query	748	BNC1	697	ARCHS4 Coexpression,994;Enrichr Queries,1022;GTEx Coexpression,75	CCNB2,DDX39A,TROAP,KIF2C,SLC7A1,AURKB
gene_set_query	749	MYOD1	697.8	ARCHS4 Coexpression,1054;ENCODE ChIP-seq,32;Enrichr Queries,934;ReMap ChIP-seq,192;GTEx Coexpression,1277	ACSL1,HMGA1,KIF23,MLYCD,AGXT,CENPA,CYP8B1,AURKB,RHNO1
gene_set_query	750	ZNF721	702	ARCHS4 Coexpression,608;Enrichr Queries,593;GTEx Coexpression,905	TGFB1,YWHAZ,AURKB
gene_set_query	751	LIN28A	702	ARCHS4 Coexpression,210;GTEx Coexpression,1194	ILF3,CHEK1,HMGA1
gene_set_query	752	ZNF83	702.8	ARCHS4 Coexpression,813;Enrichr Queries,502;ReMap ChIP-seq,229;GTEx Coexpression,1267	ACSL1,ABCA9,PIPOX,KIF2C,AURKB
gene_set_query	753	KLF11	703.3	ARCHS4 Coexpression,867;Enrichr Queries,575;GTEx Coexpression,668	ACSL1,AURKB
gene_set_query	754	ZNF248	703.7	ARCHS4 Coexpression,829;Enrichr Queries,601;GTEx Coexpression,681	MARCKS,ACSL1,AURKB
gene_set_query	755	ZNF521	703.7	ARCHS4 Coexpression,469;Enrichr Queries,950;GTEx Coexpression,692	MARCKS,EFNA5,AURKB
gene_set_query	756	LEF1	704.8	ARCHS4 Coexpression,1423;Enrichr Queries,928;ReMap ChIP-seq,172;GTEx Coexpression,296	SNRPD1,TACC3,PIPOX,AURKB,SULT2A1
gene_set_query	757	GLI2	705	ARCHS4 Coexpression,434;Enrichr Queries,264;GTEx Coexpression,1417	ILF3,HMGA1,MYBL2,EFNA5,AURKB
gene_set_query	758	PGR	705	ARCHS4 Coexpression,1327;Enrichr Queries,1016;ReMap ChIP-seq,208;GTEx Coexpression,269	AR,ACSL1,TACC3,KIF23,AURKB
gene_set_query	759	POU3F2	706.3	Literature ChIP-seq,20;ARCHS4 Coexpression,1001;Enrichr Queries,272;GTEx Coexpression,1532	ABCA6,ABCA9,KIF23,EFNA5,BAAT,SLC7A1,AURKB,CCNB2,MARCKS,CHEK1,CKS2,HAO1,ALDH8A1
gene_set_query	760	GBX2	707	Literature ChIP-seq,55;ARCHS4 Coexpression,1012;Enrichr Queries,174;GTEx Coexpression,1587	ILF3,ACSL1,ABCA9,PIPOX,MYBL2,EFNA5,AURKB
gene_set_query	761	ZNF304	709	ARCHS4 Coexpression,512;Enrichr Queries,982;GTEx Coexpression,633	KIF11,AURKB,TICRR
gene_set_query	762	ZXDA	709	ARCHS4 Coexpression,402;Enrichr Queries,1118;GTEx Coexpression,607	SNRPD1,UBE2S,AURKB
gene_set_query	763	GATAD2B	710.3	ARCHS4 Coexpression,1112;Enrichr Queries,446;GTEx Coexpression,573	ILF3,YWHAZ,AURKB
gene_set_query	764	ZNF664	711	ARCHS4 Coexpression,377;Enrichr Queries,250;GTEx Coexpression,1506	MARCKS,ILF3,YWHAZ,SLC7A1,AURKB
gene_set_query	765	SMAD5	711.5	ARCHS4 Coexpression,611;Enrichr Queries,1058;ReMap ChIP-seq,9;GTEx Coexpression,1168	DDX39A,TGFB1,UBE2S,HMGA1,TACC3,KIF2C,KIF11,SLC27A5,AURKB
gene_set_query	766	GCM1	712	ARCHS4 Coexpression,844;Enrichr Queries,908;GTEx Coexpression,384	AQP9,LONP2,AURKB
gene_set_query	767	ZNF583	712.7	ARCHS4 Coexpression,447;Enrichr Queries,1002;GTEx Coexpression,689	ORC6,ABCA9,AURKB
gene_set_query	768	FOXD4L6	713	ARCHS4 Coexpression,1307;Enrichr Queries,119	CDC20,HMGA1,KIF2C,EFNA5,AURKB
gene_set_query	769	OSR2	713.7	ARCHS4 Coexpression,1022;Enrichr Queries,906;GTEx Coexpression,213	AR,AURKB
gene_set_query	770	ZNF704	714.3	ARCHS4 Coexpression,1223;Enrichr Queries,546;GTEx Coexpression,374	HMGA1,EFNA5,AURKB
gene_set_query	771	XPA	714.7	ARCHS4 Coexpression,1123;Enrichr Queries,674;GTEx Coexpression,347	CAT,TACC3,AURKB
gene_set_query	772	HMG20A	715.3	ARCHS4 Coexpression,1268;Enrichr Queries,337;GTEx Coexpression,541	MARCKS,YWHAZ,AURKB
gene_set_query	773	ZNF428	716	ARCHS4 Coexpression,573;Enrichr Queries,177;GTEx Coexpression,1398	MARCKS,UBE2S,HMGA1,AURKB
gene_set_query	774	ZNF525	716.5	ARCHS4 Coexpression,1351;GTEx Coexpression,82	CCNB2,ILF3,DDX39A,KIF2C
gene_set_query	775	ELK3	717.3	Literature ChIP-seq,84;ARCHS4 Coexpression,905;Enrichr Queries,328;GTEx Coexpression,1552	MARCKS,TGFB1,CHEK1,TACC3,KIF11,EFNA5,YWHAZ,CYP8B1,AURKB
gene_set_query	776	OLIG3	717.3	ARCHS4 Coexpression,1172;Enrichr Queries,476;GTEx Coexpression,504	EFNA5,SLC7A1,AURKB
gene_set_query	777	HOXA2	717.5	Literature ChIP-seq,162;ARCHS4 Coexpression,364;Enrichr Queries,974;GTEx Coexpression,1370	ILF3,AURKB,TICRR
gene_set_query	778	ZSCAN29	717.7	ARCHS4 Coexpression,320;Enrichr Queries,1360;GTEx Coexpression,473	ILF3,KIF2C,AURKB,TICRR
gene_set_query	779	ZKSCAN3	718	ARCHS4 Coexpression,155;Enrichr Queries,1370;GTEx Coexpression,629	ORC6,ABCA9,AURKB,SLC27A5
gene_set_query	780	ELF2	718.3	ARCHS4 Coexpression,799;Enrichr Queries,769;GTEx Coexpression,587	ABCA9,YWHAZ,AURKB
gene_set_query	781	TRPS1	719.3	ARCHS4 Coexpression,1550;Enrichr Queries,333;GTEx Coexpression,275	MARCKS,EFNA5,AURKB
gene_set_query	782	ZNF592	720.3	ARCHS4 Coexpression,862;Enrichr Queries,784;ReMap ChIP-seq,28;GTEx Coexpression,1207	ILF3,TGFB1,ACAA1,CENPA,AURKB
gene_set_query	783	ZNF740	720.8	ARCHS4 Coexpression,781;Enrichr Queries,381;ReMap ChIP-seq,232;GTEx Coexpression,1489	MARCKS,ILF3,HMGA1,PIPOX,YWHAZ,AURKB
gene_set_query	784	ZNF679	721	ARCHS4 Coexpression,176;Enrichr Queries,509;GTEx Coexpression,1478	CCNB1,ACSL1,UBE2C,CENPA,AURKB
gene_set_query	785	ZNF138	721.7	ARCHS4 Coexpression,1551;Enrichr Queries,180;GTEx Coexpression,434	MYBL2,KIF2C,KIF11,AURKB,RHNO1
gene_set_query	786	MEIS2	722	ARCHS4 Coexpression,1020;Enrichr Queries,317;ReMap ChIP-seq,107;GTEx Coexpression,1444	MARCKS,ACSL1,PEX11G,ABCB11,EFNA5,YWHAZ,AURKB
gene_set_query	787	NAIF1	726	ARCHS4 Coexpression,1281;GTEx Coexpression,171	AQP9,TACC3
gene_set_query	788	ZNF705G	726	ARCHS4 Coexpression,1187;GTEx Coexpression,265	KIF2C
gene_set_query	789	PIN1	726	ARCHS4 Coexpression,850;GTEx Coexpression,602	DTYMK
gene_set_query	790	ZBTB8B	727.5	ARCHS4 Coexpression,191;GTEx Coexpression,1264	ORC6,ABCA9,SLC27A5
gene_set_query	791	ZNF329	727.7	ARCHS4 Coexpression,160;Enrichr Queries,1200;GTEx Coexpression,823	ORC6,ABCA9,AURKB,SLC27A5
gene_set_query	792	WIZ	729	ARCHS4 Coexpression,719;Enrichr Queries,375;GTEx Coexpression,1093	ILF3,HMGA1,AURKB
gene_set_query	793	ZNF382	729.3	ARCHS4 Coexpression,382;Enrichr Queries,986;GTEx Coexpression,820	ABCA9,AURKB,SLC27A5
gene_set_query	794	IRF7	730	ARCHS4 Coexpression,427;Enrichr Queries,1252;GTEx Coexpression,511	TGFB1,AQP9,AURKB
gene_set_query	795	BBX	730	ARCHS4 Coexpression,260;Enrichr Queries,569;GTEx Coexpression,1361	MARCKS,TGFB1,ACAA1,AURKB
gene_set_query	796	FERD3L	730.3	ARCHS4 Coexpression,1095;Enrichr Queries,853;GTEx Coexpression,243	SLC7A1,AURKB
gene_set_query	797	ZNF558	731.7	ARCHS4 Coexpression,380;Enrichr Queries,1104;GTEx Coexpression,711	ABCA9,AURKB,SLC27A5
gene_set_query	798	SOX10	731.8	ARCHS4 Coexpression,1567;Enrichr Queries,996;ReMap ChIP-seq,133;GTEx Coexpression,231	SLC10A1,CAT,KIF23,ABCA8,EFNA5,AURKB
gene_set_query	799	BHLHE22	733	ARCHS4 Coexpression,1434;ReMap ChIP-seq,105;GTEx Coexpression,660	TGFB1,TACC3,MYBL2,KIF2C
gene_set_query	800	ZNF620	734	ARCHS4 Coexpression,1433;Enrichr Queries,114;GTEx Coexpression,655	CHEK1,MYBL2,KIF2C,KIF11,AURKB,TICRR
gene_set_query	801	SNAPC2	734	ARCHS4 Coexpression,238;GTEx Coexpression,1230	TGFB1,UBE2S,HMGA1
gene_set_query	802	ZBTB21	734.5	ARCHS4 Coexpression,335;GTEx Coexpression,1134	SLC7A1,TICRR
gene_set_query	803	FOXD2	734.7	ARCHS4 Coexpression,969;Enrichr Queries,714;GTEx Coexpression,521	SNRPD1,ABCA8,EFNA5,AURKB
gene_set_query	804	NEUROG3	735	ARCHS4 Coexpression,1019;Enrichr Queries,959;GTEx Coexpression,227	ACSL5,AURKB
gene_set_query	805	ZNF507	736	ARCHS4 Coexpression,190;Enrichr Queries,932;GTEx Coexpression,1086	ILF3,KIF11,AURKB,TICRR
gene_set_query	806	ZBTB7B	736.3	ARCHS4 Coexpression,974;Enrichr Queries,428;GTEx Coexpression,807	TGFB1,HMGA1,AURKB
gene_set_query	807	KLF16	737.3	ARCHS4 Coexpression,768;Enrichr Queries,231;GTEx Coexpression,1213	TGFB1,UBE2S,HMGA1,MYBL2,AURKB
gene_set_query	808	ZBTB34	737.3	ARCHS4 Coexpression,516;Enrichr Queries,1275;GTEx Coexpression,421	TGFB1,AQP9,AURKB
gene_set_query	809	SPEN	737.5	ARCHS4 Coexpression,170;GTEx Coexpression,1305	ILF3,SLC7A1,TICRR
gene_set_query	810	ZNF527	737.7	ARCHS4 Coexpression,276;Enrichr Queries,1037;GTEx Coexpression,900	ORC6,AURKB,SLC27A5
gene_set_query	811	POU4F2	738.5	ARCHS4 Coexpression,1042;Enrichr Queries,884;ReMap ChIP-seq,76;GTEx Coexpression,952	ACSL1,KIF11,EFNA5,SLC27A5,AURKB
gene_set_query	812	ZNF316	738.7	ARCHS4 Coexpression,644;Enrichr Queries,396;GTEx Coexpression,1176	TGFB1,HMGA1,AURKB
gene_set_query	813	IRX1	739.3	ARCHS4 Coexpression,1195;Enrichr Queries,746;GTEx Coexpression,277	EFNA5,AURKB
gene_set_query	814	GLMP	740	ARCHS4 Coexpression,879;GTEx Coexpression,601	CYP27A1
gene_set_query	815	ZNF227	740.7	ARCHS4 Coexpression,89;Enrichr Queries,894;GTEx Coexpression,1239	CCNB1,CHEK1,KIF23,AURKB,TICRR
gene_set_query	816	ZNF688	741	ARCHS4 Coexpression,1280;Enrichr Queries,462;GTEx Coexpression,481	PLK1,PEX11G,AURKB
gene_set_query	817	CLOCK	741	Literature ChIP-seq,50;ARCHS4 Coexpression,1308;Enrichr Queries,824;ReMap ChIP-seq,38;GTEx Coexpression,1485	CCNB2,ILF3,MARCKS,TGFB1,ACSL5,GTSE1,CENPA,YWHAZ,AURKB,RHNO1
gene_set_query	818	LCOR	741.3	ARCHS4 Coexpression,637;Enrichr Queries,1281;GTEx Coexpression,306	MARCKS,ACSL5,AURKB
gene_set_query	819	HOXA10	741.3	ARCHS4 Coexpression,778;Enrichr Queries,205;GTEx Coexpression,1241	CDC20,PLK1,CAT,MYBL2,AURKB
gene_set_query	820	POU5F2	741.5	ARCHS4 Coexpression,334;GTEx Coexpression,1149	ABCA9,SLC27A5
gene_set_query	821	FBXL19	742	ARCHS4 Coexpression,641;GTEx Coexpression,843	ILF3
gene_set_query	822	ZKSCAN8	743	ARCHS4 Coexpression,536;GTEx Coexpression,950	ILF3,TICRR
gene_set_query	823	NR2F1	743.5	ARCHS4 Coexpression,1354;Enrichr Queries,297;ReMap ChIP-seq,254;GTEx Coexpression,1069	MARCKS,TACC3,AGXT,EFNA5,AURKB
gene_set_query	824	JRK	744.5	ARCHS4 Coexpression,220;GTEx Coexpression,1269	ILF3,SLC7A1,TICRR
gene_set_query	825	MSX2	746.3	ARCHS4 Coexpression,487;Enrichr Queries,715;GTEx Coexpression,1037	CCNB1,MYBL2,EFNA5,AURKB
gene_set_query	826	NFATC2	746.7	ARCHS4 Coexpression,792;Enrichr Queries,1083;GTEx Coexpression,365	TGFB1,AURKB
gene_set_query	827	VEZF1	747.3	ARCHS4 Coexpression,1014;Enrichr Queries,435;GTEx Coexpression,793	MARCKS,YWHAZ,AURKB
gene_set_query	828	ZFPM2	747.3	ARCHS4 Coexpression,961;Enrichr Queries,531;GTEx Coexpression,750	ABCA9,EFNA5,AURKB
gene_set_query	829	KLF14	747.5	ARCHS4 Coexpression,875;Enrichr Queries,620	UBE2S,EFNA5,AURKB
gene_set_query	830	NKX63	748	ARCHS4 Coexpression,560;GTEx Coexpression,936	SLC7A1
gene_set_query	831	ETV7	748	ARCHS4 Coexpression,419;Enrichr Queries,831;GTEx Coexpression,994	ACSL1,AQP9,AURKB
gene_set_query	832	ZNF607	748	ARCHS4 Coexpression,524;Enrichr Queries,669;GTEx Coexpression,1051	HMGA1,AURKB,RHNO1,TICRR
gene_set_query	833	SNAI3	748.3	ARCHS4 Coexpression,400;Enrichr Queries,1181;GTEx Coexpression,664	TGFB1,AQP9,AURKB
gene_set_query	834	POU5F1B	749	ARCHS4 Coexpression,424;GTEx Coexpression,1074	SNRPD1,CKS2
gene_set_query	835	STAT4	749.3	Literature ChIP-seq,79;ARCHS4 Coexpression,1249;Enrichr Queries,1199;GTEx Coexpression,470	CDC20,DTYMK,TGFB1,TACC3,ACAA1,EFNA5,AURKB
gene_set_query	836	AKNA	749.3	ARCHS4 Coexpression,984;Enrichr Queries,815;GTEx Coexpression,449	MARCKS,TGFB1,AURKB
gene_set_query	837	HOXC5	749.7	ARCHS4 Coexpression,135;Enrichr Queries,539;GTEx Coexpression,1575	CDC20,UBE2S,TROAP,MYBL2,EFNA5,AURKB
gene_set_query	838	NOBOX	750	ARCHS4 Coexpression,933;Enrichr Queries,550;GTEx Coexpression,767	TACC3,EFNA5,AURKB
gene_set_query	839	ZNF597	750.3	ARCHS4 Coexpression,1411;Enrichr Queries,480;GTEx Coexpression,360	ACSL1,CHEK1,AURKB
gene_set_query	840	ZNF18	750.7	ARCHS4 Coexpression,1332;Enrichr Queries,723;GTEx Coexpression,197	ACSL1,AQP9,TACC3,AURKB
gene_set_query	841	ZSCAN16	752	ARCHS4 Coexpression,1562;Enrichr Queries,172;GTEx Coexpression,522	ACSL1,AQP9,CKS2,KIF11,AURKB
gene_set_query	842	GATA6	752.4	Literature ChIP-seq,64;ARCHS4 Coexpression,1190;Enrichr Queries,655;ReMap ChIP-seq,246;GTEx Coexpression,1607	CDC20,ILF3,MARCKS,CAT,EFNA5,YWHAZ,CENPA,SLC27A5,AURKB
gene_set_query	843	ZNF3	753	ARCHS4 Coexpression,990;Enrichr Queries,196;GTEx Coexpression,1073	ILF3,SNRPD1,HMGA1,YWHAZ,AURKB
gene_set_query	844	LMX1A	754	ARCHS4 Coexpression,511;Enrichr Queries,582;GTEx Coexpression,1169	ORC6,CKS2,EFNA5,AURKB
gene_set_query	845	ZNF134	756.3	ARCHS4 Coexpression,628;Enrichr Queries,1018;GTEx Coexpression,623	CHEK1,AURKB
gene_set_query	846	NPAS2	758	ARCHS4 Coexpression,1275;Enrichr Queries,510;GTEx Coexpression,489	EFNA5,SLC7A1,AURKB
gene_set_query	847	POU2AF1	758.5	ARCHS4 Coexpression,1424;GTEx Coexpression,93	ORC6,MYBL2,CENPA,AURKB
gene_set_query	848	PURG	758.5	ARCHS4 Coexpression,645;GTEx Coexpression,872	MARCKS
gene_set_query	849	FOXE3	758.7	ARCHS4 Coexpression,133;Enrichr Queries,830;GTEx Coexpression,1313	ILF3,TACC3,MYBL2,AURKB,TICRR
gene_set_query	850	ZNF827	760.7	ARCHS4 Coexpression,545;Enrichr Queries,578;GTEx Coexpression,1159	MARCKS,TGFB1,AURKB
gene_set_query	851	MAFK	761	ARCHS4 Coexpression,1393;ENCODE ChIP-seq,56;Enrichr Queries,743;ReMap ChIP-seq,279;GTEx Coexpression,1334	TROAP,HMGA1,KIF11,AURKB,CYP39A1,CCNB2,DDX39A,SNRPD1,CAT,LONP2,KIF2C,GTSE1,SULT2A1
gene_set_query	852	ZNF676	761.3	ARCHS4 Coexpression,157;Enrichr Queries,721;GTEx Coexpression,1406	CYP39A1,CCNB1,MYBL2,CENPA,AURKB
gene_set_query	853	ZNF184	761.7	ARCHS4 Coexpression,753;Enrichr Queries,151;GTEx Coexpression,1381	MARCKS,CKS2,KIF11,YWHAZ,AURKB
gene_set_query	854	ZNF791	762	ARCHS4 Coexpression,336;Enrichr Queries,1030;GTEx Coexpression,920	ORC6,AURKB,SLC27A5
gene_set_query	855	ZFP90	762.3	ARCHS4 Coexpression,669;Enrichr Queries,385;GTEx Coexpression,1233	MARCKS,KIF11,AURKB
gene_set_query	856	ZNF347	763	ARCHS4 Coexpression,381;Enrichr Queries,1362;GTEx Coexpression,546	ABCA9,AURKB,SLC27A5
gene_set_query	857	MXD4	763	ARCHS4 Coexpression,584;Enrichr Queries,1177;GTEx Coexpression,528	TGFB1,AURKB
gene_set_query	858	SOX4	763	ARCHS4 Coexpression,673;Enrichr Queries,135;GTEx Coexpression,1481	CDC20,MARCKS,UBE2C,CKS2,AURKB
gene_set_query	859	ZNF713	763.3	ARCHS4 Coexpression,273;Enrichr Queries,1162;GTEx Coexpression,855	ABCA9,AURKB,SLC27A5
gene_set_query	860	ZSCAN31	764	ARCHS4 Coexpression,773;GTEx Coexpression,755	TGFB1
gene_set_query	861	ZNF180	764.7	ARCHS4 Coexpression,262;Enrichr Queries,1079;GTEx Coexpression,953	MARCKS,CHEK1,AURKB
gene_set_query	862	PAX4	764.7	ARCHS4 Coexpression,677;Enrichr Queries,1164;GTEx Coexpression,453	ABCA9,ACSL5,AURKB
gene_set_query	863	FOXJ1	765.3	ARCHS4 Coexpression,919;Enrichr Queries,647;GTEx Coexpression,730	PIPOX,SLC27A2,AURKB
gene_set_query	864	ZNF48	766.3	ARCHS4 Coexpression,486;Enrichr Queries,349;GTEx Coexpression,1464	ILF3,UBE2S,PLK1,HMGA1,KIF11
gene_set_query	865	MIXL1	766.3	ARCHS4 Coexpression,1262;Enrichr Queries,945;GTEx Coexpression,92	ORC6,MYBL2,CENPA,AURKB
gene_set_query	866	DMRTC2	766.7	ARCHS4 Coexpression,1096;Enrichr Queries,275;GTEx Coexpression,929	CCNB1,MYBL2,AURKB
gene_set_query	867	ZNF514	767.7	ARCHS4 Coexpression,241;Enrichr Queries,944;GTEx Coexpression,1118	ABCB4,ABCA9,LONP2,AURKB
gene_set_query	868	HSFX1	768.5	ARCHS4 Coexpression,1159;GTEx Coexpression,378	MLYCD
gene_set_query	869	BHLHA15	768.5	ARCHS4 Coexpression,830;GTEx Coexpression,707	SLC7A1
gene_set_query	870	ZNF792	769	ARCHS4 Coexpression,820;Enrichr Queries,1154;GTEx Coexpression,333	TGFB1,CAT,AURKB
gene_set_query	871	ZSCAN5C	769	ARCHS4 Coexpression,983;Enrichr Queries,1239;GTEx Coexpression,85	CDC20,DTYMK,SNRPD1,ABCA6,CHEK1,CENPA
gene_set_query	872	ZNF14	769	ARCHS4 Coexpression,672;Enrichr Queries,256;GTEx Coexpression,1379	MARCKS,ORC6,CKS2,AURKB
gene_set_query	873	LHX5	769.3	ARCHS4 Coexpression,1253;Enrichr Queries,491;GTEx Coexpression,564	EFNA5,AURKB
gene_set_query	874	HOXA7	769.3	ARCHS4 Coexpression,318;Enrichr Queries,1035;GTEx Coexpression,955	CAT,TACC3,AURKB
gene_set_query	875	ZKSCAN2	769.3	ARCHS4 Coexpression,422;Enrichr Queries,438;GTEx Coexpression,1448	ILF3,EFNA5,SLC7A1,AURKB,TICRR
gene_set_query	876	ATF7	769.5	ARCHS4 Coexpression,384;Enrichr Queries,1311;ReMap ChIP-seq,128;GTEx Coexpression,1255	DDX39A,SNRPD1,HMGA1,ABCA8,PEX11G,AURKB
gene_set_query	877	ZNF385C	770	ARCHS4 Coexpression,306;Enrichr Queries,1317;GTEx Coexpression,687	ABCA9,AURKB,SLC27A5
gene_set_query	878	ASCL3	770.3	ARCHS4 Coexpression,1026;Enrichr Queries,690;GTEx Coexpression,595	AGXT,AURKB
gene_set_query	879	ZNF432	770.7	ARCHS4 Coexpression,807;Enrichr Queries,1113;GTEx Coexpression,392	ILF3,ABCA9,AURKB
gene_set_query	880	DPF1	771	ARCHS4 Coexpression,1449;Enrichr Queries,83;GTEx Coexpression,781	CDC20,UBE2C,PLK1,HMGA1,MYBL2,GTSE1,AURKB
gene_set_query	881	ZNF16	771.3	ARCHS4 Coexpression,1273;Enrichr Queries,295;GTEx Coexpression,746	KIF2C,MLYCD,AURKB
gene_set_query	882	GLIS1	773	ARCHS4 Coexpression,1590;Enrichr Queries,482;GTEx Coexpression,247	AR,EFNA5,AURKB
gene_set_query	883	ZNF773	773.3	ARCHS4 Coexpression,388;Enrichr Queries,1313;GTEx Coexpression,619	ABCA9,AURKB,SLC27A5
gene_set_query	884	ZNF442	773.3	ARCHS4 Coexpression,589;Enrichr Queries,301;GTEx Coexpression,1430	ABCA9,KIF23,SLC27A2,AURKB
gene_set_query	885	TFCP2	774	ARCHS4 Coexpression,985;Enrichr Queries,160;GTEx Coexpression,1177	ILF3,CAT,KIF11,YWHAZ,AURKB
gene_set_query	886	ZNF692	774.3	ARCHS4 Coexpression,801;Enrichr Queries,139;GTEx Coexpression,1383	CDC20,ILF3,DDX39A,PLK1,HMGA1,AURKB
gene_set_query	887	TBX5	775.3	Literature ChIP-seq,115;ARCHS4 Coexpression,1518;Enrichr Queries,1139;GTEx Coexpression,329	DTYMK,SNRPD1,TROAP,TACC3,LONP2,MLYCD,AURKB
gene_set_query	888	ZBED5	776.5	ARCHS4 Coexpression,1075;GTEx Coexpression,478	ILF3
gene_set_query	889	ELF3	777.5	ARCHS4 Coexpression,1156;Enrichr Queries,1187;ReMap ChIP-seq,36;GTEx Coexpression,731	CDC20,HMGA1,TACC3,ACSL5,ABCB11,EFNA5,AURKB
gene_set_query	890	ATF6B	777.5	ARCHS4 Coexpression,392;GTEx Coexpression,1163	ORC6,TGFB1
gene_set_query	891	ZNF778	777.7	ARCHS4 Coexpression,568;Enrichr Queries,1240;GTEx Coexpression,525	ORC6,AURKB
gene_set_query	892	ZNF208	778	ARCHS4 Coexpression,824;Enrichr Queries,1270;GTEx Coexpression,240	ABCA9,MLYCD,AURKB
gene_set_query	893	ZNF615	779.7	ARCHS4 Coexpression,696;Enrichr Queries,1156;GTEx Coexpression,487	AR,TROAP,AURKB
gene_set_query	894	SATB2	780.3	ARCHS4 Coexpression,1364;Enrichr Queries,516;GTEx Coexpression,461	ACSL5,EFNA5,AURKB
gene_set_query	895	ZNF764	781.3	ARCHS4 Coexpression,1069;Enrichr Queries,612;GTEx Coexpression,663	PLK1,AURKB
gene_set_query	896	BARHL2	782	ARCHS4 Coexpression,1329;Enrichr Queries,451;GTEx Coexpression,566	EFNA5,AURKB
gene_set_query	897	NR1D2	782.3	ARCHS4 Coexpression,1274;Enrichr Queries,577;GTEx Coexpression,496	ACSL1,TACC3,AURKB
gene_set_query	898	ZNF425	783.7	ARCHS4 Coexpression,298;Enrichr Queries,1228;GTEx Coexpression,825	ABCA9,AURKB,SLC27A5
gene_set_query	899	ZNF391	784.7	ARCHS4 Coexpression,756;Enrichr Queries,1065;GTEx Coexpression,533	TGFB1,AURKB
gene_set_query	900	MSC	784.7	ARCHS4 Coexpression,944;Enrichr Queries,1159;GTEx Coexpression,251	SNRPD1,AQP9,AURKB
gene_set_query	901	ASCL1	786	ARCHS4 Coexpression,909;Enrichr Queries,888;ReMap ChIP-seq,199;GTEx Coexpression,1148	DDX39A,AGXT,PEX11G,YWHAZ,AURKB
gene_set_query	902	THAP6	786	ARCHS4 Coexpression,737;Enrichr Queries,695;GTEx Coexpression,926	MARCKS,ABCA9,AURKB
gene_set_query	903	ZNF644	786	ARCHS4 Coexpression,289;Enrichr Queries,1399;ReMap ChIP-seq,80;GTEx Coexpression,1376	MARCKS,DDX39A,TGFB1,AQP9,ABCA9,KIF2C,CENPA
gene_set_query	904	ZNF554	786.3	ARCHS4 Coexpression,309;Enrichr Queries,1265;GTEx Coexpression,785	ORC6,AURKB,SLC27A5
gene_set_query	905	TLX3	787	ARCHS4 Coexpression,878;Enrichr Queries,466;GTEx Coexpression,1017	UBE2S,EFNA5,AURKB
gene_set_query	906	ZNF311	787	ARCHS4 Coexpression,555;Enrichr Queries,252;GTEx Coexpression,1554	CHEK1,MYBL2,EFNA5,AURKB
gene_set_query	907	ZNF547	788	ARCHS4 Coexpression,185;Enrichr Queries,1333;GTEx Coexpression,846	ILF3,ORC6,SNRPD1,AURKB
gene_set_query	908	ZNF518B	788	ARCHS4 Coexpression,158;Enrichr Queries,739;GTEx Coexpression,1467	MARCKS,ACSL1,EFNA5,YWHAZ,AURKB
gene_set_query	909	ZNF774	788	ARCHS4 Coexpression,285;Enrichr Queries,763;GTEx Coexpression,1316	ABCA9,EFNA5,AURKB,SLC27A5
gene_set_query	910	LHX6	788	ARCHS4 Coexpression,1142;Enrichr Queries,999;GTEx Coexpression,223	ABCA9,AURKB
gene_set_query	911	WT1	788.8	Literature ChIP-seq,15;ARCHS4 Coexpression,771;Enrichr Queries,1086;GTEx Coexpression,1283	AR,ILF3,TGFB1,UBE2C,CHEK1,NR1I2,HMGA1,KIF2C,KIF23,EFNA5,YWHAZ,AURKB
gene_set_query	912	TFCP2L1	789.3	ARCHS4 Coexpression,1163;Enrichr Queries,619;GTEx Coexpression,586	EPHX2,AURKB
gene_set_query	913	ZNF532	789.7	ARCHS4 Coexpression,1082;Enrichr Queries,613;GTEx Coexpression,674	MARCKS,AURKB
gene_set_query	914	ZNF579	791	ARCHS4 Coexpression,1013;Enrichr Queries,259;GTEx Coexpression,1101	UBE2S,HMGA1,AURKB
gene_set_query	915	ZNF619	791	ARCHS4 Coexpression,360;Enrichr Queries,1191;GTEx Coexpression,822	ABCA9,AURKB,SLC27A5
gene_set_query	916	ZNF445	791.3	ARCHS4 Coexpression,173;Enrichr Queries,1332;GTEx Coexpression,869	ORC6,ABCA9,AURKB,SLC27A5
gene_set_query	917	NHLH2	792.7	ARCHS4 Coexpression,1184;Enrichr Queries,557;GTEx Coexpression,637	EFNA5,AURKB
gene_set_query	918	ANHX	794	ARCHS4 Coexpression,1041;GTEx Coexpression,547
gene_set_query	919	VSX1	795	ARCHS4 Coexpression,941;Enrichr Queries,901;GTEx Coexpression,543	ABCA9,AURKB
gene_set_query	920	ZNF155	795.3	ARCHS4 Coexpression,600;Enrichr Queries,920;GTEx Coexpression,866	CHEK1,AURKB
gene_set_query	921	BARX1	796.3	ARCHS4 Coexpression,165;Enrichr Queries,834;GTEx Coexpression,1390	CDC20,UBE2S,MYBL2,AURKB
gene_set_query	922	SKIL	796.3	ARCHS4 Coexpression,593;Enrichr Queries,370;GTEx Coexpression,1426	MARCKS,YWHAZ,AURKB
gene_set_query	923	SATB1	796.5	ARCHS4 Coexpression,1104;Enrichr Queries,781;ReMap ChIP-seq,288;GTEx Coexpression,1013	MARCKS,AURKB
gene_set_query	924	FOXO4	796.7	ARCHS4 Coexpression,368;Enrichr Queries,628;GTEx Coexpression,1394	TGFB1,CAT,AQP9,AURKB
gene_set_query	925	NR4A2	797.8	Literature ChIP-seq,85;ARCHS4 Coexpression,1140;Enrichr Queries,734;GTEx Coexpression,1232	MARCKS,AURKB
gene_set_query	926	ZNF157	799.3	ARCHS4 Coexpression,1036;Enrichr Queries,766;GTEx Coexpression,596	PIPOX,AURKB
gene_set_query	927	IRX4	799.7	ARCHS4 Coexpression,928;Enrichr Queries,1080;GTEx Coexpression,391	EFNA5,SLC7A1,AURKB
gene_set_query	928	ZNF57	801.3	ARCHS4 Coexpression,1461;Enrichr Queries,169;GTEx Coexpression,774	CKS2,KIF11,SLC27A2,AURKB
gene_set_query	929	ZNF324	801.3	ARCHS4 Coexpression,736;Enrichr Queries,819;GTEx Coexpression,849	ILF3,AURKB,TICRR
gene_set_query	930	CREB3	803	ARCHS4 Coexpression,1118;Enrichr Queries,1010;ReMap ChIP-seq,175;GTEx Coexpression,909	HMGA1,PEX11G,AURKB
gene_set_query	931	ZNF783	803.3	ARCHS4 Coexpression,1265;Enrichr Queries,651;GTEx Coexpression,494	ILF3,MYBL2,AURKB
gene_set_query	932	ZNF175	805.8	ARCHS4 Coexpression,1399;Enrichr Queries,1166;ReMap ChIP-seq,132;GTEx Coexpression,526	ACSL5,CENPA,SLC27A5,AURKB
gene_set_query	933	HMBOX1	807.3	ARCHS4 Coexpression,760;Enrichr Queries,1157;ReMap ChIP-seq,115;GTEx Coexpression,1197	ACSL1,ABCA9,KIF11,ABCB11,AURKB
gene_set_query	934	ZFP1	808	ARCHS4 Coexpression,658;Enrichr Queries,686;GTEx Coexpression,1080	MARCKS,YWHAZ,AURKB
gene_set_query	935	ZNF845	808.3	ARCHS4 Coexpression,549;Enrichr Queries,957;GTEx Coexpression,919	CHEK1,AURKB
gene_set_query	936	ZEB2	809	ARCHS4 Coexpression,1128;Enrichr Queries,559;ReMap ChIP-seq,34;GTEx Coexpression,1515	MARCKS,DDX39A,AQP9,HMGA1,YWHAZ,CENPA,AURKB
gene_set_query	937	ZNF500	809	ARCHS4 Coexpression,293;Enrichr Queries,1390;GTEx Coexpression,744	ABCA9,SLC27A5
gene_set_query	938	SP140L	809.5	ARCHS4 Coexpression,1276;GTEx Coexpression,343	TGFB1
gene_set_query	939	FOXD4	809.7	ARCHS4 Coexpression,960;Enrichr Queries,877;GTEx Coexpression,592	UBE2S,AURKB
gene_set_query	940	ZNF75A	809.7	ARCHS4 Coexpression,1053;Enrichr Queries,1072;GTEx Coexpression,304	ILF3,AURKB
gene_set_query	941	ZNF585A	810	ARCHS4 Coexpression,692;Enrichr Queries,998;GTEx Coexpression,740	ABCA9,AURKB
gene_set_query	942	ZBTB45	811	ARCHS4 Coexpression,1154;Enrichr Queries,204;GTEx Coexpression,1075	UBE2S,HMGA1,MYBL2,AURKB
gene_set_query	943	IKZF2	811	ARCHS4 Coexpression,1045;Enrichr Queries,1347;GTEx Coexpression,41	ORC6,SNRPD1,UBE2C,CHEK1,MYBL2,KIF11,CENPA,AURKB,RHNO1,TICRR
gene_set_query	944	ZNF559	811	ARCHS4 Coexpression,493;Enrichr Queries,653;GTEx Coexpression,1287	MARCKS,CHEK1,ABCA9,AURKB
gene_set_query	945	ZNF646	811.3	ARCHS4 Coexpression,907;Enrichr Queries,1095;GTEx Coexpression,432	TGFB1,KIF2C,AURKB
gene_set_query	946	NHLH1	812.7	ARCHS4 Coexpression,1051;Enrichr Queries,1023;GTEx Coexpression,364	AQP9,AURKB
gene_set_query	947	ZNF112	813	ARCHS4 Coexpression,633;GTEx Coexpression,993	MARCKS
gene_set_query	948	DMRT3	813	ARCHS4 Coexpression,378;Enrichr Queries,843;GTEx Coexpression,1218	MARCKS,AURKB,TICRR
gene_set_query	949	FOXN2	813	ARCHS4 Coexpression,1580;Enrichr Queries,445;GTEx Coexpression,414	MARCKS,AQP9,YWHAZ,AURKB
gene_set_query	950	PAX2	815	ARCHS4 Coexpression,1237;Enrichr Queries,494;GTEx Coexpression,714	EFNA5,AURKB
gene_set_query	951	FOXD4L1	815.7	ARCHS4 Coexpression,678;Enrichr Queries,979;GTEx Coexpression,790	CHEK1,AURKB
gene_set_query	952	ZNF230	815.7	ARCHS4 Coexpression,1198;Enrichr Queries,793;GTEx Coexpression,456	AQP9,KIF11,AURKB
gene_set_query	953	ZNF506	816.3	ARCHS4 Coexpression,197;Enrichr Queries,1165;GTEx Coexpression,1087	ORC6,ABCA9,AURKB,SLC27A5
gene_set_query	954	RBAK	816.7	ARCHS4 Coexpression,567;Enrichr Queries,1248;GTEx Coexpression,635	AURKB,TICRR
gene_set_query	955	FOXL2	817	ARCHS4 Coexpression,121;Enrichr Queries,851;GTEx Coexpression,1479	PLK1,HMGA1,MYBL2,KIF2C,AURKB
gene_set_query	956	ZNF410	817.3	ARCHS4 Coexpression,632;Enrichr Queries,345;GTEx Coexpression,1475	DDX39A,CKS2,YWHAZ,AURKB
gene_set_query	957	NPAS1	817.7	ARCHS4 Coexpression,98;Enrichr Queries,988;GTEx Coexpression,1367	ILF3,UBE2S,HMGA1,MYBL2,AURKB
gene_set_query	958	ZNF416	818.3	ARCHS4 Coexpression,741;Enrichr Queries,650;GTEx Coexpression,1064	SLC27A2,AURKB,TICRR
gene_set_query	959	ASCL2	819.3	ARCHS4 Coexpression,855;Enrichr Queries,410;GTEx Coexpression,1193	TGFB1,UBE2C,SLC27A2,AURKB
gene_set_query	960	ZSCAN23	819.3	ARCHS4 Coexpression,624;Enrichr Queries,745;GTEx Coexpression,1089	MARCKS,EFNA5,AURKB
gene_set_query	961	RFX2	819.8	ARCHS4 Coexpression,1084;Enrichr Queries,712;ReMap ChIP-seq,112;GTEx Coexpression,1371	CYP39A1,TGFB1,UBE2C,KIF23,MYBL2,AURKB
gene_set_query	962	ZNF429	820	ARCHS4 Coexpression,791;Enrichr Queries,1300;GTEx Coexpression,369	AQP9,ABCA9,AURKB
gene_set_query	963	BATF3	820.3	ARCHS4 Coexpression,848;Enrichr Queries,1203;GTEx Coexpression,410	DDX39A,SNRPD1,AURKB
gene_set_query	964	TCF21	820.5	Literature ChIP-seq,100;ARCHS4 Coexpression,1305;Enrichr Queries,1014;GTEx Coexpression,863	DTYMK,ABCA6,ABCA9,ACSL5,MLYCD,ACAA1,AURKB
gene_set_query	965	SMAD9	821	ARCHS4 Coexpression,718;Enrichr Queries,927;GTEx Coexpression,818	MARCKS,AURKB
gene_set_query	966	SPDEF	821	ARCHS4 Coexpression,872;Enrichr Queries,70;GTEx Coexpression,1521	CDC20,CCNB2,AR,UBE2C,CAT,PLK1,MYBL2,SLC27A2,AURKB
gene_set_query	967	ZNF727	821.5	ARCHS4 Coexpression,1492;GTEx Coexpression,151	HMGA1,TACC3
gene_set_query	968	ZNF667	821.7	ARCHS4 Coexpression,327;Enrichr Queries,885;GTEx Coexpression,1253	ABCA9,AURKB,SLC27A5
gene_set_query	969	IKZF3	821.7	ARCHS4 Coexpression,1310;Enrichr Queries,994;GTEx Coexpression,161	MYBL2,AURKB
gene_set_query	970	ZFP57	822	ARCHS4 Coexpression,991;Enrichr Queries,283;GTEx Coexpression,1192	CCNB1,CAT,MYBL2,AURKB
gene_set_query	971	EGR2	822	ARCHS4 Coexpression,1188;Enrichr Queries,1194;GTEx Coexpression,84	ABCA6,ABCA9,ABCA8,AURKB
gene_set_query	972	ZNF503	822	ARCHS4 Coexpression,240;Enrichr Queries,1043;GTEx Coexpression,1183	ILF3,UBE2S,SLC7A1,AURKB
gene_set_query	973	PLAG1	823.3	ARCHS4 Coexpression,1437;Enrichr Queries,533;GTEx Coexpression,500	HMGA1,ABCA8,AURKB
gene_set_query	974	DLX2	823.7	ARCHS4 Coexpression,1328;Enrichr Queries,702;GTEx Coexpression,441	CCNB1,EFNA5,AURKB
gene_set_query	975	ZNF74	828.3	ARCHS4 Coexpression,1062;Enrichr Queries,199;GTEx Coexpression,1224	ILF3,MYBL2,YWHAZ,AURKB
gene_set_query	976	ZNF37A	828.3	ARCHS4 Coexpression,373;Enrichr Queries,1310;GTEx Coexpression,802	ABCA9,AURKB,SLC27A5
gene_set_query	977	ZBTB40	830	ARCHS4 Coexpression,916;Enrichr Queries,1135;GTEx Coexpression,439	ILF3,AURKB
gene_set_query	978	MEF2D	830.3	ARCHS4 Coexpression,747;Enrichr Queries,418;GTEx Coexpression,1326	TGFB1,HMGA1,YWHAZ,AURKB
gene_set_query	979	BATF2	830.7	ARCHS4 Coexpression,218;Enrichr Queries,980;GTEx Coexpression,1294	TGFB1,ACSL1,AQP9,AURKB
gene_set_query	980	REXO4	831	ARCHS4 Coexpression,222;GTEx Coexpression,1440	ILF3,UBE2S,MYBL2
gene_set_query	981	ZNF605	832	ARCHS4 Coexpression,376;Enrichr Queries,701;GTEx Coexpression,1419	ABCA9,SLC7A1,AURKB,SLC27A5
gene_set_query	982	ZNF66	833.5	ARCHS4 Coexpression,1238;GTEx Coexpression,429	AURKB
gene_set_query	983	ZBTB10	835	ARCHS4 Coexpression,705;Enrichr Queries,670;GTEx Coexpression,1130	AR,MARCKS,AURKB
gene_set_query	984	ZBTB42	835	ARCHS4 Coexpression,1100;GTEx Coexpression,570
gene_set_query	985	YBX2	835.7	ARCHS4 Coexpression,1348;Enrichr Queries,50;GTEx Coexpression,1109	CDC20,CCNB1,UBE2C,EPHX2,PLK1,MYBL2,KIF2C,KIF11,SLC27A2,AURKB
gene_set_query	986	ZNF235	835.7	ARCHS4 Coexpression,556;Enrichr Queries,1271;GTEx Coexpression,680	MARCKS,AURKB
gene_set_query	987	RFX3	837	ARCHS4 Coexpression,1179;Enrichr Queries,775;GTEx Coexpression,557	EFNA5,AURKB
gene_set_query	988	TLX2	837.3	ARCHS4 Coexpression,527;Enrichr Queries,848;GTEx Coexpression,1137	ILF3,UBE2S,AURKB
gene_set_query	989	ZFP62	837.7	ARCHS4 Coexpression,612;Enrichr Queries,1204;GTEx Coexpression,697	MARCKS,AURKB
gene_set_query	990	ZSCAN21	838.3	ARCHS4 Coexpression,707;Enrichr Queries,1205;GTEx Coexpression,603	TGFB1,AURKB
gene_set_query	991	EEA1	838.3	ARCHS4 Coexpression,1320;Enrichr Queries,413;GTEx Coexpression,782	MARCKS,YWHAZ,AURKB
gene_set_query	992	DMRTB1	839.7	ARCHS4 Coexpression,1009;Enrichr Queries,513;GTEx Coexpression,997	TACC3,EFNA5,AURKB
gene_set_query	993	MECOM	840	Literature ChIP-seq,52;ARCHS4 Coexpression,943;GTEx Coexpression,1525	TGFB1,AQP9,ABCA9,CKS2,ACSL5,MYBL2,KIF23,YWHAZ,CENPA
gene_set_query	994	ZNF628	840.3	ARCHS4 Coexpression,1228;Enrichr Queries,241;GTEx Coexpression,1052	TGFB1,UBE2S,HMGA1,AURKB
gene_set_query	995	ZNF786	841.7	ARCHS4 Coexpression,989;Enrichr Queries,852;GTEx Coexpression,684	ABCA9,AURKB
gene_set_query	996	GLI3	843.3	ARCHS4 Coexpression,922;Enrichr Queries,483;GTEx Coexpression,1125	MARCKS,EFNA5,AURKB
gene_set_query	997	ZNF763	843.3	ARCHS4 Coexpression,917;Enrichr Queries,1294;GTEx Coexpression,319	AQP9,SLC7A1,AURKB
gene_set_query	998	CPEB1	843.5	ARCHS4 Coexpression,1097;GTEx Coexpression,590
gene_set_query	999	ZNF784	843.7	ARCHS4 Coexpression,1400;Enrichr Queries,460;GTEx Coexpression,671	HMGA1,AURKB
gene_set_query	1000	ZNF814	844	ARCHS4 Coexpression,261;GTEx Coexpression,1427	ABCA9,SLC27A5
gene_set_query	1001	PRDM16	845.3	Literature ChIP-seq,154;ARCHS4 Coexpression,1255;Enrichr Queries,540;GTEx Coexpression,1432	EFNA5,AURKB
gene_set_query	1002	HIC1	845.3	ARCHS4 Coexpression,1382;Enrichr Queries,1055;GTEx Coexpression,99	ABCA6,ABCA9,ABCA8,AURKB
gene_set_query	1003	PRDM2	846.7	ARCHS4 Coexpression,1088;Enrichr Queries,1287;GTEx Coexpression,165	SCP2,ACAA1,AURKB
gene_set_query	1004	FOXG1	846.7	ARCHS4 Coexpression,654;Enrichr Queries,1005;GTEx Coexpression,881	MARCKS,AURKB
gene_set_query	1005	ZNF765	847.3	ARCHS4 Coexpression,307;Enrichr Queries,1312;GTEx Coexpression,923	ABCA9,AURKB,SLC27A5
gene_set_query	1006	RARB	847.5	Literature ChIP-seq,82;ARCHS4 Coexpression,1345;Enrichr Queries,493;GTEx Coexpression,1470	ACSL5,KIF2C,KIF11,MLYCD,EFNA5,BAAT,AURKB
gene_set_query	1007	ZNF552	848.3	ARCHS4 Coexpression,1615;Enrichr Queries,412;GTEx Coexpression,518	AQP9,MYBL2,KIF11,AURKB
gene_set_query	1008	DPRX	848.3	ARCHS4 Coexpression,60;Enrichr Queries,947;GTEx Coexpression,1538	CCNB1,ORC6,UBE2C,MYBL2,CENPA,AURKB
gene_set_query	1009	ZNF431	849	ARCHS4 Coexpression,341;Enrichr Queries,1291;GTEx Coexpression,915	ABCA9,AURKB,SLC27A5
gene_set_query	1010	ZBTB7C	849	ARCHS4 Coexpression,1202;Enrichr Queries,608;GTEx Coexpression,737	EFNA5,AURKB
gene_set_query	1011	SIX2	849	ARCHS4 Coexpression,1346;Enrichr Queries,625;ReMap ChIP-seq,283;GTEx Coexpression,1142	EFNA5,AURKB
gene_set_query	1012	TFAP2E	849.7	ARCHS4 Coexpression,622;Enrichr Queries,1288;GTEx Coexpression,639	CAT,AURKB
gene_set_query	1013	ZNF707	849.7	ARCHS4 Coexpression,1108;Enrichr Queries,1308;GTEx Coexpression,133	DDX39A,TACC3,AURKB
gene_set_query	1014	ZNF43	851	ARCHS4 Coexpression,1491;Enrichr Queries,913;GTEx Coexpression,149	ILF3,KIF2C,AURKB
gene_set_query	1015	ZNF213	853	ARCHS4 Coexpression,1033;Enrichr Queries,764;GTEx Coexpression,762	HMGA1,AURKB
gene_set_query	1016	HELT	855	ARCHS4 Coexpression,1152;Enrichr Queries,454;GTEx Coexpression,959	EFNA5,AURKB
gene_set_query	1017	TEF	855.7	ARCHS4 Coexpression,1498;Enrichr Queries,310;GTEx Coexpression,759	ACSL1,EPHX2,AURKB
gene_set_query	1018	TBX20	855.7	ARCHS4 Coexpression,1619;Enrichr Queries,472;GTEx Coexpression,476	MLYCD,EFNA5,AURKB
gene_set_query	1019	EPAS1	857	ARCHS4 Coexpression,1407;Enrichr Queries,1048;ReMap ChIP-seq,248;GTEx Coexpression,725	TGFB1,SLC7A1,AURKB
gene_set_query	1020	ZNF131	857	ARCHS4 Coexpression,1523;Enrichr Queries,239;GTEx Coexpression,809	CCNB1,PLK1,YWHAZ,AURKB
gene_set_query	1021	DDIT3	858	ARCHS4 Coexpression,777;Enrichr Queries,1215;GTEx Coexpression,582	ILF3,AURKB
gene_set_query	1022	THRA	858.3	Literature ChIP-seq,152;ARCHS4 Coexpression,1599;Enrichr Queries,298;GTEx Coexpression,1384	MARCKS,YWHAZ,AURKB
gene_set_query	1023	FEZF1	858.3	ARCHS4 Coexpression,893;Enrichr Queries,529;GTEx Coexpression,1153	EFNA5,AURKB
gene_set_query	1024	ZNF568	858.7	ARCHS4 Coexpression,845;Enrichr Queries,1119;GTEx Coexpression,612	ABCA9,AURKB
gene_set_query	1025	ZNF793	858.7	ARCHS4 Coexpression,153;Enrichr Queries,1277;GTEx Coexpression,1146	ORC6,ABCA9,AURKB,SLC27A5
gene_set_query	1026	MTERF1	859	ARCHS4 Coexpression,1616;GTEx Coexpression,102	SNRPD1,CHEK1,CENPA
gene_set_query	1027	ZSCAN25	859.5	ARCHS4 Coexpression,1165;GTEx Coexpression,554
gene_set_query	1028	RAX2	859.7	ARCHS4 Coexpression,1279;Enrichr Queries,271;GTEx Coexpression,1029	ORC6,HMGA1,AURKB
gene_set_query	1029	SOX14	860.3	ARCHS4 Coexpression,430;Enrichr Queries,849;GTEx Coexpression,1302	ORC6,CYP8B1,AURKB
gene_set_query	1030	CSRNP2	860.5	ARCHS4 Coexpression,1025;GTEx Coexpression,696
gene_set_query	1031	HOXA5	861.7	ARCHS4 Coexpression,674;Enrichr Queries,360;GTEx Coexpression,1551	CDC20,PLK1,CAT,AURKB
gene_set_query	1032	ESRRG	862	ARCHS4 Coexpression,417;Enrichr Queries,751;GTEx Coexpression,1418	ABCA9,TACC3,EFNA5,AURKB
gene_set_query	1033	ZNF80	862.3	ARCHS4 Coexpression,1239;Enrichr Queries,977;GTEx Coexpression,371	TGFB1,AURKB
gene_set_query	1034	HSFY2	863.5	ARCHS4 Coexpression,1032;GTEx Coexpression,695
gene_set_query	1035	FIZ1	863.7	ARCHS4 Coexpression,782;Enrichr Queries,246;GTEx Coexpression,1563	ILF3,UBE2S,PLK1,HMGA1,AURKB
gene_set_query	1036	EN2	864	ARCHS4 Coexpression,950;Enrichr Queries,903;GTEx Coexpression,739	ORC6,AURKB
gene_set_query	1037	ATOH7	865	ARCHS4 Coexpression,1092;Enrichr Queries,521;GTEx Coexpression,982	SLC27A2,AURKB
gene_set_query	1038	ZNF865	865	ARCHS4 Coexpression,722;GTEx Coexpression,1008	TGFB1
gene_set_query	1039	ZNF484	865.7	ARCHS4 Coexpression,557;Enrichr Queries,1192;GTEx Coexpression,848	CENPA,AURKB
gene_set_query	1040	ZFHX4	865.7	ARCHS4 Coexpression,442;Enrichr Queries,579;GTEx Coexpression,1576	MARCKS,EFNA5,AURKB
gene_set_query	1041	TOPORS	866	ARCHS4 Coexpression,1504;GTEx Coexpression,228	KIF2C
gene_set_query	1042	ZNF276	866.3	ARCHS4 Coexpression,745;Enrichr Queries,810;GTEx Coexpression,1044	TGFB1,AURKB
gene_set_query	1043	ZNF875	866.3	ARCHS4 Coexpression,976;Enrichr Queries,1341;GTEx Coexpression,282	ILF3,AURKB,SLC27A5
gene_set_query	1044	SEBOX	866.5	ARCHS4 Coexpression,1330;Enrichr Queries,403	CCNB2,AGXT,AURKB
gene_set_query	1045	VAX2	866.7	ARCHS4 Coexpression,772;Enrichr Queries,871;GTEx Coexpression,957	UBE2S,AURKB
gene_set_query	1046	INSM2	867	ARCHS4 Coexpression,1126;Enrichr Queries,762;GTEx Coexpression,713	EFNA5,AURKB
gene_set_query	1047	HOXD3	867	ARCHS4 Coexpression,1363;Enrichr Queries,972;GTEx Coexpression,266	AR,AURKB
gene_set_query	1048	ZNF549	868.3	ARCHS4 Coexpression,1017;Enrichr Queries,864;GTEx Coexpression,724	ORC6,ABCA9
gene_set_query	1049	SAFB2	868.5	ARCHS4 Coexpression,346;GTEx Coexpression,1391	ILF3,TGFB1
gene_set_query	1050	PURA	871	ARCHS4 Coexpression,1024;GTEx Coexpression,718
gene_set_query	1051	ZNF99	871.7	ARCHS4 Coexpression,610;Enrichr Queries,1355;GTEx Coexpression,650	ABCA9,AURKB
gene_set_query	1052	KMT2A	872	ARCHS4 Coexpression,1231;ReMap ChIP-seq,247;GTEx Coexpression,1138	KIF23,KIF11
gene_set_query	1053	PAX3	873	ARCHS4 Coexpression,1070;Enrichr Queries,615;GTEx Coexpression,934	EFNA5,AURKB
gene_set_query	1054	ZNF526	873	ARCHS4 Coexpression,1480;Enrichr Queries,93;GTEx Coexpression,1046	ILF3,PLK1,CKS2,HMGA1,TACC3,MYBL2,AURKB
gene_set_query	1055	ZFHX3	873.3	ARCHS4 Coexpression,1207;Enrichr Queries,348;GTEx Coexpression,1065	MARCKS,EFNA5,AURKB
gene_set_query	1056	HES4	873.3	ARCHS4 Coexpression,796;Enrichr Queries,254;GTEx Coexpression,1570	CDC20,MARCKS,UBE2S,AURKB
gene_set_query	1057	PRDM15	874.3	ARCHS4 Coexpression,720;Enrichr Queries,1352;GTEx Coexpression,551	AURKB,SLC27A5
gene_set_query	1058	PRDM10	874.7	ARCHS4 Coexpression,351;Enrichr Queries,1283;GTEx Coexpression,990	TACC3,AURKB,TICRR
gene_set_query	1059	ZNF404	875	ARCHS4 Coexpression,708;Enrichr Queries,940;GTEx Coexpression,977	MARCKS,AURKB
gene_set_query	1060	ZNF611	875	ARCHS4 Coexpression,343;Enrichr Queries,1280;GTEx Coexpression,1002	ABCA9,AURKB,SLC27A5
gene_set_query	1061	ZNF91	875.3	ARCHS4 Coexpression,1383;Enrichr Queries,278;GTEx Coexpression,965	MARCKS,ACSL1,AURKB
gene_set_query	1062	KLF10	876	ARCHS4 Coexpression,1297;Enrichr Queries,377;GTEx Coexpression,954	MARCKS,YWHAZ,AURKB
gene_set_query	1063	NOTO	878	ARCHS4 Coexpression,998;Enrichr Queries,1404;GTEx Coexpression,232	ABCA9,ACSL5
gene_set_query	1064	ZFY	878.3	ARCHS4 Coexpression,497;Enrichr Queries,860;GTEx Coexpression,1278	UBE2S,MYBL2,AURKB
gene_set_query	1065	ZNF672	879	ARCHS4 Coexpression,500;Enrichr Queries,740;GTEx Coexpression,1397	CDC20,TGFB1,TACC3,AURKB
gene_set_query	1066	NEUROG1	879.3	ARCHS4 Coexpression,1456;Enrichr Queries,867;GTEx Coexpression,315	MLYCD,AURKB
gene_set_query	1067	GATA5	879.3	ARCHS4 Coexpression,175;Enrichr Queries,897;GTEx Coexpression,1566	EPHX2,NR1I2,ACSL5,AURKB
gene_set_query	1068	ZNF513	879.3	ARCHS4 Coexpression,1107;Enrichr Queries,1396;GTEx Coexpression,135	DDX39A,PEX11G
gene_set_query	1069	ZNF594	880	ARCHS4 Coexpression,559;Enrichr Queries,1369;GTEx Coexpression,712	ABCA9,AURKB
gene_set_query	1070	ZNF224	880.7	ARCHS4 Coexpression,738;Enrichr Queries,1131;GTEx Coexpression,773	ABCA9,AURKB
gene_set_query	1071	ZNF283	881.3	ARCHS4 Coexpression,274;Enrichr Queries,1120;GTEx Coexpression,1250	ORC6,AURKB,SLC27A5
gene_set_query	1072	GLIS3	882	ARCHS4 Coexpression,690;Enrichr Queries,610;GTEx Coexpression,1346	TACC3,EFNA5,AURKB
gene_set_query	1073	DBP	882.7	ARCHS4 Coexpression,1258;Enrichr Queries,586;GTEx Coexpression,804	EPHX2,AURKB
gene_set_query	1074	TBX4	883	ARCHS4 Coexpression,937;Enrichr Queries,500;GTEx Coexpression,1212	ABCA9,EFNA5,AURKB
gene_set_query	1075	ZSCAN32	883	ARCHS4 Coexpression,1459;GTEx Coexpression,307	AQP9
gene_set_query	1076	HOXB8	883.7	ARCHS4 Coexpression,134;Enrichr Queries,1101;GTEx Coexpression,1416	ILF3,UBE2S,HMGA1,SLC7A1,AURKB
gene_set_query	1077	RORA	884.7	ARCHS4 Coexpression,1303;Enrichr Queries,646;GTEx Coexpression,705	EFNA5,AURKB
gene_set_query	1078	PATZ1	885.3	ARCHS4 Coexpression,906;Enrichr Queries,190;GTEx Coexpression,1560	ILF3,PLK1,HMGA1,AURKB
gene_set_query	1079	ZNF414	885.3	ARCHS4 Coexpression,1056;Enrichr Queries,208;GTEx Coexpression,1392	TGFB1,UBE2S,HMGA1,AURKB
gene_set_query	1080	ZNF546	885.3	ARCHS4 Coexpression,746;Enrichr Queries,807;GTEx Coexpression,1103	ABCA9,EFNA5,AURKB
gene_set_query	1081	FOXN3	885.7	ARCHS4 Coexpression,900;Enrichr Queries,756;GTEx Coexpression,1001	MARCKS,DTYMK,AURKB
gene_set_query	1082	CASZ1	887	ARCHS4 Coexpression,1161;Enrichr Queries,801;GTEx Coexpression,699	EFNA5,AURKB
gene_set_query	1083	POU3F3	887.7	ARCHS4 Coexpression,764;Enrichr Queries,471;GTEx Coexpression,1428	MARCKS,EFNA5,AURKB
gene_set_query	1084	HAND2	887.7	ARCHS4 Coexpression,433;Enrichr Queries,969;GTEx Coexpression,1261	ILF3,UBE2S,AURKB
gene_set_query	1085	RXRG	888	ARCHS4 Coexpression,1205;Enrichr Queries,635;GTEx Coexpression,824	AGXT,AURKB
gene_set_query	1086	MECP2	888.3	ARCHS4 Coexpression,1547;Enrichr Queries,228;GTEx Coexpression,890	MARCKS,HMGA1,YWHAZ,AURKB
gene_set_query	1087	ZNF417	888.7	ARCHS4 Coexpression,852;Enrichr Queries,1225;GTEx Coexpression,589	ABCA9,AURKB
gene_set_query	1088	HES7	889	ARCHS4 Coexpression,1055;Enrichr Queries,654;GTEx Coexpression,958	HMGA1,AURKB
gene_set_query	1089	PAX8	889.5	ARCHS4 Coexpression,1335;Enrichr Queries,1301;ReMap ChIP-seq,81;GTEx Coexpression,841	ILF3,MARCKS,SNRPD1,UBE2S,KIF2C,AURKB
gene_set_query	1090	ZNF441	890	ARCHS4 Coexpression,488;Enrichr Queries,1250;GTEx Coexpression,932	ABCA9,LONP2,AURKB
gene_set_query	1091	ZNF260	890	ARCHS4 Coexpression,572;Enrichr Queries,703;GTEx Coexpression,1395	MARCKS,TGFB1,AURKB
gene_set_query	1092	HOXC6	891.7	ARCHS4 Coexpression,448;Enrichr Queries,726;GTEx Coexpression,1501	UBE2C,UBE2S,AURKB,TICRR
gene_set_query	1093	ZNF697	891.7	ARCHS4 Coexpression,475;Enrichr Queries,672;GTEx Coexpression,1528	MARCKS,HMGA1,SLC7A1,AURKB
gene_set_query	1094	ZNF510	893	ARCHS4 Coexpression,1175;Enrichr Queries,889;GTEx Coexpression,615	AURKB
gene_set_query	1095	ZNF841	893	ARCHS4 Coexpression,314;Enrichr Queries,1094;GTEx Coexpression,1271	ABCA6,ABCA9,AURKB
gene_set_query	1096	ZNF394	893.7	ARCHS4 Coexpression,1379;Enrichr Queries,827;GTEx Coexpression,475	TGFB1,ACSL1,AURKB
gene_set_query	1097	GBX1	893.7	ARCHS4 Coexpression,1130;Enrichr Queries,468;GTEx Coexpression,1083	EFNA5,AURKB
gene_set_query	1098	THAP12	895	ARCHS4 Coexpression,779;GTEx Coexpression,1011	KIF11
gene_set_query	1099	ZNF30	895.3	ARCHS4 Coexpression,1381;Enrichr Queries,440;GTEx Coexpression,865	EPHX2,SLC27A2,AURKB
gene_set_query	1100	EGR3	895.3	ARCHS4 Coexpression,1059;Enrichr Queries,1160;GTEx Coexpression,467	EFNA5,AURKB
gene_set_query	1101	HES6	895.3	ARCHS4 Coexpression,1368;Enrichr Queries,43;GTEx Coexpression,1275	CDC20,CCNB2,CCNB1,UBE2C,PLK1,CKS2,HMGA1,MYBL2,KIF2C,KIF11,AURKB
gene_set_query	1102	ZBTB11	895.5	ARCHS4 Coexpression,1412;Enrichr Queries,1320;ReMap ChIP-seq,117;GTEx Coexpression,733	TACC3,YWHAZ,CENPA,SLC27A5,AURKB
gene_set_query	1103	NEUROD2	895.8	Literature ChIP-seq,126;ARCHS4 Coexpression,1284;Enrichr Queries,1398;GTEx Coexpression,775	PLK1,MLYCD,GTSE1,CYP8B1
gene_set_query	1104	ZBTB22	896	ARCHS4 Coexpression,726;Enrichr Queries,1186;GTEx Coexpression,776	TGFB1,AURKB
gene_set_query	1105	GTF2I	897	ARCHS4 Coexpression,897	ILF3
gene_set_query	1106	DZIP1	897.7	ARCHS4 Coexpression,1072;Enrichr Queries,688;GTEx Coexpression,933	EFNA5,AURKB
gene_set_query	1107	EGR4	898	ARCHS4 Coexpression,925;Enrichr Queries,1096;GTEx Coexpression,673	EPHX2,AURKB
gene_set_query	1108	PBX4	898.7	ARCHS4 Coexpression,999;Enrichr Queries,823;GTEx Coexpression,874	TGFB1,MYBL2,AURKB
gene_set_query	1109	REL	899	ARCHS4 Coexpression,788;Enrichr Queries,1338;GTEx Coexpression,571	ABCA9,AURKB
gene_set_query	1110	MSANTD1	899.5	ARCHS4 Coexpression,561;GTEx Coexpression,1238	GTSE1
gene_set_query	1111	ZNF517	899.7	ARCHS4 Coexpression,297;Enrichr Queries,1182;GTEx Coexpression,1220	ABCA9,AURKB,SLC27A5
gene_set_query	1112	HOXB3	899.7	ARCHS4 Coexpression,953;Enrichr Queries,968;GTEx Coexpression,778	ILF3,AURKB
gene_set_query	1113	ZSCAN22	900.7	ARCHS4 Coexpression,729;Enrichr Queries,649;GTEx Coexpression,1324	HMGA1,AURKB,SLC27A5
gene_set_query	1114	SOX1	901	ARCHS4 Coexpression,940;Enrichr Queries,452;GTEx Coexpression,1311	MARCKS,EFNA5,AURKB
gene_set_query	1115	ZNF69	901.3	ARCHS4 Coexpression,1546;Enrichr Queries,846;GTEx Coexpression,312	SCP2,AURKB
gene_set_query	1116	ZNF44	902	ARCHS4 Coexpression,313;Enrichr Queries,1264;GTEx Coexpression,1129	ABCA9,AURKB,SLC27A5
gene_set_query	1117	ZNF596	904	ARCHS4 Coexpression,1157;Enrichr Queries,772;GTEx Coexpression,783	EPHX2,AURKB
gene_set_query	1118	ZNF160	904.3	ARCHS4 Coexpression,420;Enrichr Queries,1012;GTEx Coexpression,1281	UBE2S,ABCA9,AURKB
gene_set_query	1119	SP100	906.3	ARCHS4 Coexpression,1370;Enrichr Queries,732;GTEx Coexpression,617	MARCKS,AURKB
gene_set_query	1120	ZNF710	908	ARCHS4 Coexpression,841;Enrichr Queries,759;GTEx Coexpression,1124	MARCKS,TGFB1,AURKB
gene_set_query	1121	ZNF502	908	ARCHS4 Coexpression,508;Enrichr Queries,1038;GTEx Coexpression,1178	CHEK1,LONP2,AURKB
gene_set_query	1122	ZNF524	908.3	ARCHS4 Coexpression,671;Enrichr Queries,858;GTEx Coexpression,1196	TGFB1,AURKB
gene_set_query	1123	ZNF564	912.7	ARCHS4 Coexpression,1214;Enrichr Queries,1243;GTEx Coexpression,281	AQP9,AURKB
gene_set_query	1124	RXRB	912.7	ARCHS4 Coexpression,770;Enrichr Queries,383;GTEx Coexpression,1585	TGFB1,HMGA1,YWHAZ,AURKB
gene_set_query	1125	NCOA2	913	ARCHS4 Coexpression,1323;Enrichr Queries,1293;ReMap ChIP-seq,194;GTEx Coexpression,842	MYBL2,SLC27A2,CENPA,AURKB
gene_set_query	1126	ALX3	914	ARCHS4 Coexpression,538;Enrichr Queries,859;GTEx Coexpression,1345	ILF3,SLC7A1,AURKB
gene_set_query	1127	MAFF	915.6	ARCHS4 Coexpression,1621;ENCODE ChIP-seq,89;Enrichr Queries,1183;ReMap ChIP-seq,224;GTEx Coexpression,1461	CDC20,DDX39A,SNRPD1,TROAP,CAT,KIF2C,YWHAZ,AURKB,SULT2A1
gene_set_query	1128	ZNF488	916	ARCHS4 Coexpression,1577;Enrichr Queries,255	CDC20,KIF11,AURKB
gene_set_query	1129	ZNF768	916.3	ARCHS4 Coexpression,975;Enrichr Queries,261;GTEx Coexpression,1513	ILF3,PLK1,KIF11,AURKB
gene_set_query	1130	NFATC3	918	ARCHS4 Coexpression,1300;Enrichr Queries,391;GTEx Coexpression,1063	CAT,MYBL2,AURKB
gene_set_query	1131	ZNF174	918.7	ARCHS4 Coexpression,1086;Enrichr Queries,706;GTEx Coexpression,964	SLC27A2,AURKB
gene_set_query	1132	PHOX2B	918.7	ARCHS4 Coexpression,468;Enrichr Queries,949;GTEx Coexpression,1339	ILF3,UBE2S,AURKB
gene_set_query	1133	ZNF557	919	ARCHS4 Coexpression,310;Enrichr Queries,1319;GTEx Coexpression,1128	ABCA9,AURKB,SLC27A5
gene_set_query	1134	TFDP3	919.3	ARCHS4 Coexpression,911;Enrichr Queries,788;GTEx Coexpression,1059	SLC10A1,MYBL2,AURKB
gene_set_query	1135	ZNF770	919.7	ARCHS4 Coexpression,1334;Enrichr Queries,954;GTEx Coexpression,471	SLC7A1,AURKB
gene_set_query	1136	ZNF728	920.5	ARCHS4 Coexpression,724;GTEx Coexpression,1117	CCNB1
gene_set_query	1137	ZNF24	920.8	ARCHS4 Coexpression,1415;Enrichr Queries,758;ReMap ChIP-seq,121;GTEx Coexpression,1389	CDC20,HMGA1,KIF2C,YWHAZ,AURKB
gene_set_query	1138	ZFP30	922	ARCHS4 Coexpression,825;Enrichr Queries,1178;GTEx Coexpression,763	ABCA9,AURKB
gene_set_query	1139	ETV3	922.3	ARCHS4 Coexpression,479;Enrichr Queries,1361;GTEx Coexpression,927	ACSL1,AQP9,AURKB
gene_set_query	1140	ASCL5	922.5	ARCHS4 Coexpression,1261;GTEx Coexpression,584
gene_set_query	1141	HDX	922.7	ARCHS4 Coexpression,569;Enrichr Queries,753;GTEx Coexpression,1446	MARCKS,EFNA5,AURKB
gene_set_query	1142	ZFP37	924	ARCHS4 Coexpression,1604;Enrichr Queries,547;GTEx Coexpression,621	MARCKS,AURKB
gene_set_query	1143	SPIC	924	ARCHS4 Coexpression,540;Enrichr Queries,1292;GTEx Coexpression,940	EPHX2,MYBL2,AURKB
gene_set_query	1144	OVOL3	924.5	ARCHS4 Coexpression,1344;GTEx Coexpression,505	DDX39A
gene_set_query	1145	SOX21	924.7	ARCHS4 Coexpression,988;Enrichr Queries,1050;GTEx Coexpression,736	GTSE1,AURKB
gene_set_query	1146	HMX1	925.7	ARCHS4 Coexpression,379;Enrichr Queries,836;GTEx Coexpression,1562	UBE2S,MYBL2,AURKB
gene_set_query	1147	TCF7L1	925.7	ARCHS4 Coexpression,136;Enrichr Queries,1088;GTEx Coexpression,1553	SNRPD1,CHEK1,CKS2,HMGA1,AURKB
gene_set_query	1148	SP6	926	ARCHS4 Coexpression,775;Enrichr Queries,1146;GTEx Coexpression,857	MYBL2,AURKB
gene_set_query	1149	ZNF35	926.7	ARCHS4 Coexpression,648;Enrichr Queries,1226;GTEx Coexpression,906	SNRPD1,AURKB
gene_set_query	1150	ZNF669	926.7	ARCHS4 Coexpression,1576;Enrichr Queries,639;GTEx Coexpression,565	ORC6,AURKB
gene_set_query	1151	SKOR1	927	ARCHS4 Coexpression,996;GTEx Coexpression,858	UBE2S
gene_set_query	1152	ZNF383	927	ARCHS4 Coexpression,317;Enrichr Queries,1255;GTEx Coexpression,1209	ABCA9,AURKB,SLC27A5
gene_set_query	1153	ZNF799	927	ARCHS4 Coexpression,1474;Enrichr Queries,1031;GTEx Coexpression,276	AQP9,AURKB
gene_set_query	1154	GRHL3	929	ARCHS4 Coexpression,1065;Enrichr Queries,713;GTEx Coexpression,1009	CDC20,AURKB
gene_set_query	1155	ZNF846	929.3	ARCHS4 Coexpression,1018;Enrichr Queries,1150;GTEx Coexpression,620	AURKB
gene_set_query	1156	SP7	929.3	ARCHS4 Coexpression,621;Enrichr Queries,1046;GTEx Coexpression,1121	TGFB1,AURKB
gene_set_query	1157	BAZ2B	930.3	ARCHS4 Coexpression,993;Enrichr Queries,755;GTEx Coexpression,1043	MARCKS,ABCA9,AURKB
gene_set_query	1158	RFX7	930.7	ARCHS4 Coexpression,535;Enrichr Queries,1262;GTEx Coexpression,995	ILF3,AURKB,TICRR
gene_set_query	1159	UNCX	932	ARCHS4 Coexpression,1340;Enrichr Queries,878;GTEx Coexpression,578	AURKB
gene_set_query	1160	USF3	932.5	ARCHS4 Coexpression,761;GTEx Coexpression,1104	ABCA9
gene_set_query	1161	CREB3L1	932.5	ARCHS4 Coexpression,1611;Enrichr Queries,961;ReMap ChIP-seq,116;GTEx Coexpression,1042	HMGA1,KIF11,PEX11G,AURKB
gene_set_query	1162	PRDM12	933	ARCHS4 Coexpression,1206;Enrichr Queries,1024;GTEx Coexpression,569	AURKB
gene_set_query	1163	TSC22D1	933.3	ARCHS4 Coexpression,1388;Enrichr Queries,312;GTEx Coexpression,1100	MARCKS,YWHAZ,AURKB
gene_set_query	1164	HOXC12	933.7	ARCHS4 Coexpression,1452;Enrichr Queries,837;GTEx Coexpression,512	EFNA5,AURKB
gene_set_query	1165	ZNF222	934.7	ARCHS4 Coexpression,1505;Enrichr Queries,1115;GTEx Coexpression,184	AQP9,TACC3,AURKB
gene_set_query	1166	SETBP1	934.7	ARCHS4 Coexpression,924;Enrichr Queries,380;GTEx Coexpression,1500	MARCKS,EFNA5,AURKB
gene_set_query	1167	GRHL1	934.7	ARCHS4 Coexpression,1570;Enrichr Queries,658;GTEx Coexpression,576	ACSL1,AURKB
gene_set_query	1168	PAX1	935	ARCHS4 Coexpression,1373;Enrichr Queries,841;GTEx Coexpression,591	AURKB
gene_set_query	1169	ZNF561	935	ARCHS4 Coexpression,743;Enrichr Queries,978;GTEx Coexpression,1084	SNRPD1,AURKB
gene_set_query	1170	SIX4	935	ARCHS4 Coexpression,912;Enrichr Queries,617;GTEx Coexpression,1276	KIF23,EFNA5,AURKB
gene_set_query	1171	ZNF440	937	ARCHS4 Coexpression,742;Enrichr Queries,1089;GTEx Coexpression,980	ABCA9,AURKB
gene_set_query	1172	ZNF747	937	ARCHS4 Coexpression,748;Enrichr Queries,923;GTEx Coexpression,1140	PLK1,SLC27A5
gene_set_query	1173	DBX1	937.3	ARCHS4 Coexpression,1260;Enrichr Queries,481;GTEx Coexpression,1071	EFNA5,AURKB
gene_set_query	1174	ZSCAN20	937.7	ARCHS4 Coexpression,1116;Enrichr Queries,1373;GTEx Coexpression,324	CHEK1,AURKB
gene_set_query	1175	ZNF223	938	ARCHS4 Coexpression,1526;Enrichr Queries,640;GTEx Coexpression,648	ACSL1,AURKB
gene_set_query	1176	THAP5	939	ARCHS4 Coexpression,1378;Enrichr Queries,891;GTEx Coexpression,548	AURKB
gene_set_query	1177	NKX26	939	ARCHS4 Coexpression,1548;GTEx Coexpression,330	MLYCD
gene_set_query	1178	SP3	939	ARCHS4 Coexpression,1362;Enrichr Queries,342;GTEx Coexpression,1113	MARCKS,YWHAZ,AURKB
gene_set_query	1179	HOXD12	939.3	ARCHS4 Coexpression,1483;Enrichr Queries,845;GTEx Coexpression,490	AR,AURKB
gene_set_query	1180	ZNF705A	940	ARCHS4 Coexpression,981;Enrichr Queries,459;GTEx Coexpression,1380	PLK1,ABCA9,AURKB
gene_set_query	1181	HOXB2	940.7	ARCHS4 Coexpression,935;Enrichr Queries,1054;GTEx Coexpression,833	TGFB1,AURKB
gene_set_query	1182	ZNF600	941.3	ARCHS4 Coexpression,1194;Enrichr Queries,463;GTEx Coexpression,1167	ACSL1,AURKB
gene_set_query	1183	ZSCAN9	943	ARCHS4 Coexpression,1537;GTEx Coexpression,349	YWHAZ
gene_set_query	1184	EHF	943	ARCHS4 Coexpression,1230;Enrichr Queries,1235;ReMap ChIP-seq,293;GTEx Coexpression,1014	AURKB
gene_set_query	1185	ZIC4	943	ARCHS4 Coexpression,1068;Enrichr Queries,873;GTEx Coexpression,888	EFNA5
gene_set_query	1186	PKNOX2	943.3	ARCHS4 Coexpression,963;Enrichr Queries,512;GTEx Coexpression,1355	ABCA9,EFNA5,AURKB
gene_set_query	1187	TEAD1	943.8	ARCHS4 Coexpression,1582;Enrichr Queries,607;ReMap ChIP-seq,287;GTEx Coexpression,1299	EFNA5,AURKB
gene_set_query	1188	PLAGL1	944	ARCHS4 Coexpression,1139;Enrichr Queries,605;GTEx Coexpression,1088	MARCKS,AURKB
gene_set_query	1189	VENTX	944	ARCHS4 Coexpression,1380;Enrichr Queries,966;GTEx Coexpression,486	AQP9,AURKB
gene_set_query	1190	CREB3L2	944.3	ARCHS4 Coexpression,642;Enrichr Queries,630;GTEx Coexpression,1561	MARCKS,SLC7A1,AURKB
gene_set_query	1191	NCOA1	946	ARCHS4 Coexpression,1058;Enrichr Queries,1326;ReMap ChIP-seq,240;GTEx Coexpression,1160	SLC27A2,SLC27A5,AURKB
gene_set_query	1192	ZNF470	947	ARCHS4 Coexpression,315;Enrichr Queries,1161;GTEx Coexpression,1365	ABCA9,AURKB,SLC27A5
gene_set_query	1193	TIGD4	947.7	ARCHS4 Coexpression,269;Enrichr Queries,973;GTEx Coexpression,1601	MARCKS,EFNA5,AURKB
gene_set_query	1194	ZBTB4	949.3	ARCHS4 Coexpression,1538;Enrichr Queries,661;GTEx Coexpression,649	MARCKS,AURKB
gene_set_query	1195	IRX3	949.3	ARCHS4 Coexpression,1168;Enrichr Queries,1216;GTEx Coexpression,464	EFNA5,AURKB
gene_set_query	1196	ZNF79	949.7	ARCHS4 Coexpression,408;Enrichr Queries,1230;GTEx Coexpression,1211	DDX39A,AURKB,TICRR
gene_set_query	1197	HOXB5	950	ARCHS4 Coexpression,1377;Enrichr Queries,1040;GTEx Coexpression,433	ACSL5,AURKB
gene_set_query	1198	HOXC4	950.3	ARCHS4 Coexpression,73;Enrichr Queries,1233;GTEx Coexpression,1545	ILF3,UBE2S,MYBL2,SLC7A1,AURKB,TICRR
gene_set_query	1199	LHX3	950.7	ARCHS4 Coexpression,902;Enrichr Queries,883;GTEx Coexpression,1067	MYBL2,AURKB
gene_set_query	1200	ZNF804A	952	ARCHS4 Coexpression,1121;Enrichr Queries,768;GTEx Coexpression,967	EFNA5,AURKB
gene_set_query	1201	ZNF169	952.3	ARCHS4 Coexpression,1016;Enrichr Queries,1001;GTEx Coexpression,840	AURKB,SLC27A5
gene_set_query	1202	NKX61	952.5	ARCHS4 Coexpression,1271;GTEx Coexpression,634
gene_set_query	1203	E4F1	953	Literature ChIP-seq,163;ARCHS4 Coexpression,1288;Enrichr Queries,813;GTEx Coexpression,1548	HMGA1,AURKB
gene_set_query	1204	CARF	953	ARCHS4 Coexpression,704;GTEx Coexpression,1202	ABCA9
gene_set_query	1205	HOXA4	953.7	ARCHS4 Coexpression,910;Enrichr Queries,926;GTEx Coexpression,1025	UBE2S,AURKB
gene_set_query	1206	NFIX	954.7	ARCHS4 Coexpression,1464;Enrichr Queries,562;GTEx Coexpression,838	MARCKS,AURKB
gene_set_query	1207	THAP3	955	ARCHS4 Coexpression,230;Enrichr Queries,1121;GTEx Coexpression,1514	DTYMK,SNRPD1,MLYCD,AURKB
gene_set_query	1208	ZNF140	956	ARCHS4 Coexpression,1515;Enrichr Queries,1142;GTEx Coexpression,211	ILF3,AURKB
gene_set_query	1209	ZIC1	957	ARCHS4 Coexpression,1499;Enrichr Queries,522;GTEx Coexpression,850	EFNA5,AURKB
gene_set_query	1210	ZNF518A	957.7	ARCHS4 Coexpression,1591;Enrichr Queries,1064;GTEx Coexpression,218	ILF3,AURKB
gene_set_query	1211	ZNF189	959.3	ARCHS4 Coexpression,939;Enrichr Queries,941;GTEx Coexpression,998	LONP2,AURKB
gene_set_query	1212	ZNF716	959.7	ARCHS4 Coexpression,267;Enrichr Queries,1358;GTEx Coexpression,1254	ABCA9,AURKB,SLC27A5
gene_set_query	1213	ZNF776	960.7	ARCHS4 Coexpression,817;Enrichr Queries,1114;GTEx Coexpression,951	ABCA9,AURKB
gene_set_query	1214	BARX2	961.3	ARCHS4 Coexpression,1143;Enrichr Queries,717;GTEx Coexpression,1024	EFNA5,AURKB
gene_set_query	1215	FOXR2	961.3	ARCHS4 Coexpression,1429;Enrichr Queries,167;GTEx Coexpression,1288	PIPOX,MYBL2,SLC27A2,AURKB
gene_set_query	1216	ZNF12	962.7	ARCHS4 Coexpression,735;Enrichr Queries,989;GTEx Coexpression,1164	MARCKS,AURKB
gene_set_query	1217	ZNF483	963	ARCHS4 Coexpression,870;Enrichr Queries,1276;GTEx Coexpression,743	ABCA9,AURKB
gene_set_query	1218	ZNF415	963.3	ARCHS4 Coexpression,992;Enrichr Queries,1335;GTEx Coexpression,563	TGFB1,AURKB
gene_set_query	1219	TBPL1	965	ARCHS4 Coexpression,507;GTEx Coexpression,1423	SNRPD1,CKS2
gene_set_query	1220	PHF1	965	ARCHS4 Coexpression,683;GTEx Coexpression,1247	TGFB1
gene_set_query	1221	ZNF772	965.3	ARCHS4 Coexpression,631;Enrichr Queries,1322;GTEx Coexpression,943	TGFB1,AURKB
gene_set_query	1222	ZNF461	966	ARCHS4 Coexpression,842;Enrichr Queries,1087;GTEx Coexpression,969	ABCA9,AURKB
gene_set_query	1223	ZNF567	966.7	ARCHS4 Coexpression,903;Enrichr Queries,544;GTEx Coexpression,1453	ORC6,KIF11,AURKB
gene_set_query	1224	ZNF354B	969.7	ARCHS4 Coexpression,1021;Enrichr Queries,566;GTEx Coexpression,1322	SLC27A2,AURKB
gene_set_query	1225	TFEC	969.7	ARCHS4 Coexpression,245;Enrichr Queries,1324;GTEx Coexpression,1340	CYP27A1,ACSL1,AQP9,AURKB
gene_set_query	1226	CCDC17	970.5	ARCHS4 Coexpression,962;GTEx Coexpression,979	SLC27A2
gene_set_query	1227	PROX2	971.3	ARCHS4 Coexpression,794;Enrichr Queries,779;GTEx Coexpression,1341	ABCA9,EFNA5,AURKB
gene_set_query	1228	FOXP4	971.3	ARCHS4 Coexpression,790;Enrichr Queries,709;GTEx Coexpression,1415	ILF3,HMGA1,AURKB
gene_set_query	1229	ZNF333	971.7	ARCHS4 Coexpression,717;Enrichr Queries,1302;GTEx Coexpression,896	ABCA9,AURKB
gene_set_query	1230	ZNF234	971.7	ARCHS4 Coexpression,684;Enrichr Queries,1256;GTEx Coexpression,975	ABCA9,AURKB
gene_set_query	1231	NR4A3	973	ARCHS4 Coexpression,873;Enrichr Queries,1133;GTEx Coexpression,913	ACSL1,AURKB
gene_set_query	1232	ATMIN	973.3	ARCHS4 Coexpression,1405;Enrichr Queries,200;GTEx Coexpression,1315	ACSL1,YWHAZ,SLC7A1,AURKB
gene_set_query	1233	LHX1	974	ARCHS4 Coexpression,1050;Enrichr Queries,898	AURKB
gene_set_query	1234	LHX2	974.3	ARCHS4 Coexpression,1397;Enrichr Queries,955;ReMap ChIP-seq,183;GTEx Coexpression,1362	MARCKS,HMGA1,YWHAZ,AURKB
gene_set_query	1235	ZMAT4	974.3	ARCHS4 Coexpression,1178;Enrichr Queries,993;GTEx Coexpression,752	EFNA5
gene_set_query	1236	FOXE1	974.7	ARCHS4 Coexpression,1266;Enrichr Queries,1026;GTEx Coexpression,632	AURKB
gene_set_query	1237	MESP2	975.3	ARCHS4 Coexpression,1315;Enrichr Queries,1257;GTEx Coexpression,354	YWHAZ,AURKB
gene_set_query	1238	ZBTB26	977.7	ARCHS4 Coexpression,749;Enrichr Queries,776;GTEx Coexpression,1408	MARCKS,AURKB
gene_set_query	1239	EN1	978.3	ARCHS4 Coexpression,1216;Enrichr Queries,868;GTEx Coexpression,851	AURKB
gene_set_query	1240	ZNF671	978.7	ARCHS4 Coexpression,955;Enrichr Queries,1224;GTEx Coexpression,757	SLC27A2,AURKB
gene_set_query	1241	ZNF705E	979	ARCHS4 Coexpression,1226;GTEx Coexpression,732
gene_set_query	1242	GCM2	979.3	ARCHS4 Coexpression,1035;Enrichr Queries,869;GTEx Coexpression,1034	AURKB
gene_set_query	1243	ZNF501	980.3	ARCHS4 Coexpression,599;Enrichr Queries,1251;GTEx Coexpression,1091	AURKB,SLC27A5
gene_set_query	1244	TFAP2D	982	ARCHS4 Coexpression,523;Enrichr Queries,935;GTEx Coexpression,1488	TROAP,CHEK1,AURKB
gene_set_query	1245	HIVEP2	982	ARCHS4 Coexpression,1352;Enrichr Queries,624;GTEx Coexpression,970	MARCKS,AURKB
gene_set_query	1246	BARHL1	982	ARCHS4 Coexpression,1564;Enrichr Queries,485;GTEx Coexpression,897	EFNA5,AURKB
gene_set_query	1247	ZNF512	983	ARCHS4 Coexpression,1317;Enrichr Queries,340;GTEx Coexpression,1292	PLK1,KIF11,AURKB
gene_set_query	1248	PITX2	983.7	ARCHS4 Coexpression,1248;Enrichr Queries,711;GTEx Coexpression,992	EFNA5,AURKB
gene_set_query	1249	SOX7	983.7	ARCHS4 Coexpression,1337;Enrichr Queries,1069;GTEx Coexpression,545	AURKB
gene_set_query	1250	DUXA	984	ARCHS4 Coexpression,194;Enrichr Queries,1155;GTEx Coexpression,1603	CCNB1,UBE2C,CENPA,AURKB
gene_set_query	1251	FEV	984	ARCHS4 Coexpression,544;Enrichr Queries,900;GTEx Coexpression,1508	SCP2,EPHX2,AURKB
gene_set_query	1252	ZNF606	984.3	ARCHS4 Coexpression,1331;Enrichr Queries,1296;GTEx Coexpression,326	ILF3,AURKB
gene_set_query	1253	ZNF75D	985	ARCHS4 Coexpression,755;Enrichr Queries,914;GTEx Coexpression,1286	SNRPD1,AURKB
gene_set_query	1254	ZNF322	985	ARCHS4 Coexpression,604;GTEx Coexpression,1366	TGFB1
gene_set_query	1255	ZNF649	985	ARCHS4 Coexpression,580;Enrichr Queries,1042;GTEx Coexpression,1333	CHEK1,AURKB
gene_set_query	1256	ZNF221	986.3	ARCHS4 Coexpression,1569;Enrichr Queries,1116;GTEx Coexpression,274	CHEK1,AURKB
gene_set_query	1257	CSRNP3	987	ARCHS4 Coexpression,1233;GTEx Coexpression,741
gene_set_query	1258	FOXB2	987	ARCHS4 Coexpression,1039;Enrichr Queries,449;GTEx Coexpression,1473	EFNA5,AURKB
gene_set_query	1259	OLIG2	987.3	Literature ChIP-seq,59;ARCHS4 Coexpression,1503;Enrichr Queries,919;GTEx Coexpression,1468	CCNB2,NR1I2,TACC3,LONP2,HAO1,PEX11G,EFNA5,AURKB,SULT2A1
gene_set_query	1260	NRL	988.7	ARCHS4 Coexpression,1309;Enrichr Queries,478;GTEx Coexpression,1179	MYBL2,AURKB
gene_set_query	1261	ZNF25	989	ARCHS4 Coexpression,1171;Enrichr Queries,995;GTEx Coexpression,801	AURKB
gene_set_query	1262	ZNF254	990.7	ARCHS4 Coexpression,578;Enrichr Queries,1109;GTEx Coexpression,1285	MARCKS,AURKB
gene_set_query	1263	ZNF575	991	ARCHS4 Coexpression,597;Enrichr Queries,990;GTEx Coexpression,1386	TGFB1,AURKB
gene_set_query	1264	MYCL	992.5	ARCHS4 Coexpression,1197;GTEx Coexpression,788
gene_set_query	1265	IRF6	993	ARCHS4 Coexpression,1192;Enrichr Queries,1174;GTEx Coexpression,613	AURKB
gene_set_query	1266	SNAPC5	993.5	ARCHS4 Coexpression,492;GTEx Coexpression,1495	DTYMK,SNRPD1
gene_set_query	1267	SOX18	994	ARCHS4 Coexpression,1620;Enrichr Queries,1222;GTEx Coexpression,140	ABCA9,AURKB,RHNO1
gene_set_query	1268	ZUP1	994.3	ARCHS4 Coexpression,1535;Enrichr Queries,1375;GTEx Coexpression,73	UBE2C,CHEK1,KIF11,CENPA,AURKB
gene_set_query	1269	ZNF365	996	ARCHS4 Coexpression,1125;Enrichr Queries,744;GTEx Coexpression,1119	EFNA5,AURKB
gene_set_query	1270	ZIM3	996.7	ARCHS4 Coexpression,1101;Enrichr Queries,1172;GTEx Coexpression,717	ABCB4
gene_set_query	1271	MYNN	996.8	ARCHS4 Coexpression,1536;Enrichr Queries,1329;ReMap ChIP-seq,185;GTEx Coexpression,937	DDX39A,HMGA1,TACC3,AURKB
gene_set_query	1272	ASH1L	1000	ARCHS4 Coexpression,1028;Enrichr Queries,1387;GTEx Coexpression,585
gene_set_query	1273	ZNF621	1001	ARCHS4 Coexpression,389;Enrichr Queries,1351;GTEx Coexpression,1263	ABCA9,AURKB,SLC27A5
gene_set_query	1274	ST18	1001	ARCHS4 Coexpression,1229;Enrichr Queries,1214;GTEx Coexpression,561	AURKB
gene_set_query	1275	ARX	1001	ARCHS4 Coexpression,945;Enrichr Queries,596;GTEx Coexpression,1463	MARCKS,EFNA5,AURKB
gene_set_query	1276	FOXJ3	1002	ARCHS4 Coexpression,948;Enrichr Queries,1263;GTEx Coexpression,794	ILF3,YWHAZ
gene_set_query	1277	ZNF132	1002	ARCHS4 Coexpression,715;Enrichr Queries,1307;GTEx Coexpression,984	LONP2,AURKB
gene_set_query	1278	GSC2	1003	ARCHS4 Coexpression,1111;Enrichr Queries,838;GTEx Coexpression,1061	AURKB
gene_set_query	1279	HOXC10	1004	ARCHS4 Coexpression,1251;Enrichr Queries,1047;GTEx Coexpression,715	AURKB
gene_set_query	1280	ZNF346	1005	ARCHS4 Coexpression,1398;Enrichr Queries,401;GTEx Coexpression,1215	ILF3,HMGA1,AURKB
gene_set_query	1281	ZNF98	1005	ARCHS4 Coexpression,1419;Enrichr Queries,765;GTEx Coexpression,830	CAT,AURKB
gene_set_query	1282	ZNF33B	1005	ARCHS4 Coexpression,1295;Enrichr Queries,1051;GTEx Coexpression,670	AURKB
gene_set_query	1283	RBPJL	1005	ARCHS4 Coexpression,1446;Enrichr Queries,918;GTEx Coexpression,652	AURKB
gene_set_query	1284	FOXF2	1006	ARCHS4 Coexpression,1124;Enrichr Queries,1039;GTEx Coexpression,854	AURKB
gene_set_query	1285	ZNF343	1006	ARCHS4 Coexpression,1199;Enrichr Queries,811;GTEx Coexpression,1007	ACSL1,AURKB
gene_set_query	1286	ZBTB38	1006	ARCHS4 Coexpression,1023;Enrichr Queries,644;GTEx Coexpression,1351	MARCKS,AURKB
gene_set_query	1287	CAMTA1	1006	ARCHS4 Coexpression,1302;Enrichr Queries,761;GTEx Coexpression,956	YWHAZ,AURKB
gene_set_query	1288	DLX6	1010	ARCHS4 Coexpression,1342;Enrichr Queries,489;GTEx Coexpression,1200	EFNA5,AURKB
gene_set_query	1289	ZNF32	1011	ARCHS4 Coexpression,978;Enrichr Queries,535;GTEx Coexpression,1519	CKS2,SLC7A1,AURKB
gene_set_query	1290	HOXB1	1013	ARCHS4 Coexpression,1110;Enrichr Queries,967;GTEx Coexpression,961	AURKB
gene_set_query	1291	ZNF780B	1013	ARCHS4 Coexpression,304;Enrichr Queries,1321;GTEx Coexpression,1414	ABCA9,AURKB,SLC27A5
gene_set_query	1292	ZNF444	1015	ARCHS4 Coexpression,1506;Enrichr Queries,594;GTEx Coexpression,944	HMGA1,AURKB
gene_set_query	1293	BHLHE41	1016	ARCHS4 Coexpression,959;GTEx Coexpression,1072	CYP27A1
gene_set_query	1294	ZNF565	1017	ARCHS4 Coexpression,1316;Enrichr Queries,1082;GTEx Coexpression,654	AURKB
gene_set_query	1295	KAT7	1018	ARCHS4 Coexpression,733;GTEx Coexpression,1303	ORC6
gene_set_query	1296	DMBX1	1020	ARCHS4 Coexpression,1430;Enrichr Queries,257;GTEx Coexpression,1374	MYBL2,EFNA5,AURKB
gene_set_query	1297	TGIF2LY	1021	ARCHS4 Coexpression,797;Enrichr Queries,829;GTEx Coexpression,1437	MARCKS,YWHAZ
gene_set_query	1298	NPAS4	1021	ARCHS4 Coexpression,1252;Enrichr Queries,1105;GTEx Coexpression,706	AURKB
gene_set_query	1299	ZNF334	1021	ARCHS4 Coexpression,618;Enrichr Queries,1190;GTEx Coexpression,1256	MARCKS,AURKB
gene_set_query	1300	HOXA3	1022	ARCHS4 Coexpression,923;Enrichr Queries,960;GTEx Coexpression,1184	CAT,AURKB
gene_set_query	1301	RFX6	1023	ARCHS4 Coexpression,471;Enrichr Queries,1144;GTEx Coexpression,1455	SCP2,EPHX2,AURKB
gene_set_query	1302	FOXI1	1023	ARCHS4 Coexpression,1211;Enrichr Queries,970;GTEx Coexpression,889	AURKB
gene_set_query	1303	ZNF468	1024	ARCHS4 Coexpression,1494;Enrichr Queries,964;GTEx Coexpression,614	AURKB
gene_set_query	1304	DPF3	1024	ARCHS4 Coexpression,1131;Enrichr Queries,616;GTEx Coexpression,1325	EFNA5,AURKB
gene_set_query	1305	ZSCAN2	1024	ARCHS4 Coexpression,1595;Enrichr Queries,1167;GTEx Coexpression,310	YWHAZ,AURKB
gene_set_query	1306	SOX5	1026	ARCHS4 Coexpression,800;Enrichr Queries,673;GTEx Coexpression,1604	MARCKS,EFNA5,AURKB
gene_set_query	1307	SIX6	1029	ARCHS4 Coexpression,968;Enrichr Queries,866;GTEx Coexpression,1252	EFNA5,AURKB
gene_set_query	1308	GSX2	1030	ARCHS4 Coexpression,744;Enrichr Queries,840;GTEx Coexpression,1505	MARCKS,AURKB
gene_set_query	1309	ZNF805	1030	ARCHS4 Coexpression,1158;Enrichr Queries,1106;GTEx Coexpression,827	AURKB
gene_set_query	1310	ZNF541	1031	ARCHS4 Coexpression,1272;Enrichr Queries,1137;GTEx Coexpression,683	AURKB
gene_set_query	1311	ZNF474	1032	ARCHS4 Coexpression,1066;Enrichr Queries,484;GTEx Coexpression,1546	EFNA5,AURKB
gene_set_query	1312	GZF1	1033	ARCHS4 Coexpression,1144;Enrichr Queries,803;GTEx Coexpression,1151	MARCKS,AURKB
gene_set_query	1313	ZNF570	1033	ARCHS4 Coexpression,1524;Enrichr Queries,1111;GTEx Coexpression,463	KIF2C,AURKB
gene_set_query	1314	RHOXF1	1033	ARCHS4 Coexpression,982;Enrichr Queries,1388;GTEx Coexpression,728	YWHAZ
gene_set_query	1315	PAX7	1033	ARCHS4 Coexpression,1285;Enrichr Queries,506;GTEx Coexpression,1309	EFNA5,AURKB
gene_set_query	1316	TBX22	1034	ARCHS4 Coexpression,1048;Enrichr Queries,937;GTEx Coexpression,1116	AURKB
gene_set_query	1317	ZNF804B	1034	ARCHS4 Coexpression,1064;Enrichr Queries,1393;GTEx Coexpression,645
gene_set_query	1318	ZNF345	1035	ARCHS4 Coexpression,711;Enrichr Queries,1151;GTEx Coexpression,1244	ABCA9,AURKB
gene_set_query	1319	ZNF569	1036	ARCHS4 Coexpression,1497;Enrichr Queries,287;GTEx Coexpression,1323	KIF11,SLC27A2,AURKB
gene_set_query	1320	FOXO6	1036	ARCHS4 Coexpression,1256;Enrichr Queries,733;GTEx Coexpression,1120	EFNA5,AURKB
gene_set_query	1321	NR2E3	1037	ARCHS4 Coexpression,1493;Enrichr Queries,581	NR1I2,AURKB
gene_set_query	1322	YBX3	1038	ARCHS4 Coexpression,1038;GTEx Coexpression,1038
gene_set_query	1323	ZNF420	1038	ARCHS4 Coexpression,1472;Enrichr Queries,921;GTEx Coexpression,722	AURKB
gene_set_query	1324	ZNF385B	1039	ARCHS4 Coexpression,997;Enrichr Queries,750;GTEx Coexpression,1369	AR,EFNA5,AURKB
gene_set_query	1325	TBX15	1043	ARCHS4 Coexpression,874;Enrichr Queries,1032;GTEx Coexpression,1223	MLYCD,AURKB
gene_set_query	1326	ZBTB46	1046	ARCHS4 Coexpression,818;Enrichr Queries,1260;GTEx Coexpression,1060	SLC27A2,AURKB
gene_set_query	1327	NPAS3	1047	ARCHS4 Coexpression,986;Enrichr Queries,679;GTEx Coexpression,1476	MARCKS,EFNA5,AURKB
gene_set_query	1328	ZNF485	1049	ARCHS4 Coexpression,1455;Enrichr Queries,542;GTEx Coexpression,1150	KIF11,AURKB
gene_set_query	1329	ZNF423	1049	ARCHS4 Coexpression,1438;Enrichr Queries,912;GTEx Coexpression,797	AURKB
gene_set_query	1330	ASCL4	1050	ARCHS4 Coexpression,1343;Enrichr Queries,899;GTEx Coexpression,908	AURKB
gene_set_query	1331	ZNF226	1051	ARCHS4 Coexpression,1511;Enrichr Queries,1340;GTEx Coexpression,301	ILF3,AURKB
gene_set_query	1332	TSHZ3	1051	ARCHS4 Coexpression,1409;Enrichr Queries,263;GTEx Coexpression,1480	MARCKS,EFNA5,AURKB
gene_set_query	1333	MTERF2	1052	ARCHS4 Coexpression,646;GTEx Coexpression,1457	TGFB1
gene_set_query	1334	ZNF460	1052	ARCHS4 Coexpression,1593;Enrichr Queries,359;GTEx Coexpression,1203	YWHAZ,SLC7A1,AURKB
gene_set_query	1335	ZNF808	1053	ARCHS4 Coexpression,805;Enrichr Queries,1062;GTEx Coexpression,1291	ABCA9,AURKB
gene_set_query	1336	ZNF516	1053	ARCHS4 Coexpression,1296;Enrichr Queries,747;GTEx Coexpression,1115	MARCKS,AURKB
gene_set_query	1337	PTF1A	1056	ARCHS4 Coexpression,1448;Enrichr Queries,874;GTEx Coexpression,845	AURKB
gene_set_query	1338	ZNF497	1056	ARCHS4 Coexpression,1031;Enrichr Queries,971;GTEx Coexpression,1166	AURKB
gene_set_query	1339	ZNF529	1056	ARCHS4 Coexpression,695;Enrichr Queries,1316;GTEx Coexpression,1158	ABCA9,AURKB
gene_set_query	1340	HEY1	1057	ARCHS4 Coexpression,586;Enrichr Queries,1025;GTEx Coexpression,1559	MARCKS,AURKB
gene_set_query	1341	TEAD3	1057	ARCHS4 Coexpression,1304;Enrichr Queries,587;GTEx Coexpression,1280	HMGA1,AURKB
gene_set_query	1342	ZFP2	1057	ARCHS4 Coexpression,1395;Enrichr Queries,592;GTEx Coexpression,1185	EPHX2,AURKB
gene_set_query	1343	TIGD6	1058	ARCHS4 Coexpression,1628;Enrichr Queries,1303;GTEx Coexpression,242	CHEK1,AURKB
gene_set_query	1344	OTP	1060	ARCHS4 Coexpression,1085;Enrichr Queries,870;GTEx Coexpression,1225	AURKB
gene_set_query	1345	GTF2IRD1	1060	ARCHS4 Coexpression,1089;GTEx Coexpression,1031
gene_set_query	1346	ZNF550	1061	ARCHS4 Coexpression,1353;Enrichr Queries,1141;GTEx Coexpression,688	AURKB
gene_set_query	1347	ZNF782	1061	ARCHS4 Coexpression,1325;Enrichr Queries,597;GTEx Coexpression,1262	KIF11,AURKB
gene_set_query	1348	ZNF573	1061	ARCHS4 Coexpression,1587;Enrichr Queries,501;GTEx Coexpression,1096	SLC7A1,AURKB
gene_set_query	1349	ZNF701	1063	ARCHS4 Coexpression,1623;Enrichr Queries,1274;GTEx Coexpression,292	AQP9,AURKB
gene_set_query	1350	SNAI2	1066	ARCHS4 Coexpression,1618;Enrichr Queries,956;ReMap ChIP-seq,253;GTEx Coexpression,1435	TACC3,PEX11G,AURKB
gene_set_query	1351	ZNF665	1067	ARCHS4 Coexpression,765;Enrichr Queries,1063;GTEx Coexpression,1373	AURKB,SLC27A5
gene_set_query	1352	LHX9	1067	ARCHS4 Coexpression,1049;Enrichr Queries,636;GTEx Coexpression,1517	EFNA5,AURKB
gene_set_query	1353	IKZF5	1069	ARCHS4 Coexpression,1293;Enrichr Queries,1297;GTEx Coexpression,616	AURKB
gene_set_query	1354	ZNF831	1069	ARCHS4 Coexpression,1417;Enrichr Queries,1402;GTEx Coexpression,389	TGFB1
gene_set_query	1355	INSM1	1070	ARCHS4 Coexpression,1267;Enrichr Queries,677;GTEx Coexpression,1265	EFNA5,AURKB
gene_set_query	1356	TIGD7	1070	ARCHS4 Coexpression,1496;Enrichr Queries,887;GTEx Coexpression,826	AURKB
gene_set_query	1357	ZNF790	1070	ARCHS4 Coexpression,1269;Enrichr Queries,1323;GTEx Coexpression,618	AURKB
gene_set_query	1358	SP140	1070	ARCHS4 Coexpression,1425;Enrichr Queries,1359;GTEx Coexpression,427	MYBL2,AURKB
gene_set_query	1359	ZNF660	1072	ARCHS4 Coexpression,1006;Enrichr Queries,1134;GTEx Coexpression,1076	AURKB,SLC27A5
gene_set_query	1360	FOXD4L4	1074	ARCHS4 Coexpression,1079;GTEx Coexpression,1068
gene_set_query	1361	FOXN1	1074	ARCHS4 Coexpression,1162;Enrichr Queries,1070;GTEx Coexpression,989	AURKB
gene_set_query	1362	FAM200B	1075	ARCHS4 Coexpression,883;GTEx Coexpression,1266	ILF3
gene_set_query	1363	IKZF4	1075	ARCHS4 Coexpression,1259;Enrichr Queries,1179;GTEx Coexpression,786	AURKB
gene_set_query	1364	AIRE	1075	ARCHS4 Coexpression,831;Enrichr Queries,965;GTEx Coexpression,1429	YWHAZ,AURKB
gene_set_query	1365	ARHGAP35	1076	ARCHS4 Coexpression,652;GTEx Coexpression,1499	SLC7A1
gene_set_query	1366	MYPOP	1076	ARCHS4 Coexpression,629;GTEx Coexpression,1522	TGFB1
gene_set_query	1367	ZNF214	1076	ARCHS4 Coexpression,1487;Enrichr Queries,560;GTEx Coexpression,1182	SLC27A2,AURKB
gene_set_query	1368	MGA	1077	ARCHS4 Coexpression,616;Enrichr Queries,1148;GTEx Coexpression,1466	AURKB,TICRR
gene_set_query	1369	GPBP1L1	1077	ARCHS4 Coexpression,1250;GTEx Coexpression,904
gene_set_query	1370	ZNF618	1080	ARCHS4 Coexpression,846;Enrichr Queries,984;GTEx Coexpression,1410	ILF3,AURKB
gene_set_query	1371	ZSCAN18	1081	ARCHS4 Coexpression,1555;Enrichr Queries,802;GTEx Coexpression,886	EPHX2,AURKB
gene_set_query	1372	PROP1	1081	ARCHS4 Coexpression,1292;Enrichr Queries,857;GTEx Coexpression,1094	AURKB
gene_set_query	1373	SIX1	1081	ARCHS4 Coexpression,1138;Enrichr Queries,1198;GTEx Coexpression,907	AURKB
gene_set_query	1374	ZNF148	1081	ARCHS4 Coexpression,617;Enrichr Queries,1267;GTEx Coexpression,1360	HMGA1,YWHAZ
gene_set_query	1375	ZNF761	1082	ARCHS4 Coexpression,1441;Enrichr Queries,265;GTEx Coexpression,1540	UBE2C,CKS2,AURKB
gene_set_query	1376	THAP9	1082	ARCHS4 Coexpression,1534;Enrichr Queries,292;GTEx Coexpression,1421	CKS2,KIF11,AURKB
gene_set_query	1377	NFAT5	1085	ARCHS4 Coexpression,1030;Enrichr Queries,1147;GTEx Coexpression,1077	AURKB
gene_set_query	1378	RORB	1086	ARCHS4 Coexpression,1201;Enrichr Queries,699;GTEx Coexpression,1358	EFNA5,AURKB
gene_set_query	1379	HSF2	1087	ARCHS4 Coexpression,1426;Enrichr Queries,365;GTEx Coexpression,1469	MARCKS,CKS2,AURKB
gene_set_query	1380	TBX1	1087	ARCHS4 Coexpression,1264;Enrichr Queries,942;GTEx Coexpression,1054	AURKB
gene_set_query	1381	GLIS2	1087	ARCHS4 Coexpression,1560;Enrichr Queries,652;GTEx Coexpression,1049	TGFB1,AURKB
gene_set_query	1382	ZBTB37	1087	ARCHS4 Coexpression,699;Enrichr Queries,1272;GTEx Coexpression,1290	ABCA9,AURKB
gene_set_query	1383	ZNF251	1088	ARCHS4 Coexpression,816;Enrichr Queries,1140;GTEx Coexpression,1307	MARCKS,AURKB
gene_set_query	1384	ZBTB24	1093	ARCHS4 Coexpression,1469;Enrichr Queries,629;GTEx Coexpression,1180	SLC7A1,AURKB
gene_set_query	1385	ZNF449	1093	ARCHS4 Coexpression,551;Enrichr Queries,1382;GTEx Coexpression,1347	MARCKS
gene_set_query	1386	THRB	1093	ARCHS4 Coexpression,1445;Enrichr Queries,518;GTEx Coexpression,1317	EFNA5,AURKB
gene_set_query	1387	ZBED9	1094	ARCHS4 Coexpression,1219;GTEx Coexpression,968
gene_set_query	1388	TBX19	1094	ARCHS4 Coexpression,1392;Enrichr Queries,663;GTEx Coexpression,1226	EFNA5,AURKB
gene_set_query	1389	SIM1	1094	ARCHS4 Coexpression,1185;Enrichr Queries,526;GTEx Coexpression,1571	EFNA5,AURKB
gene_set_query	1390	EBF4	1094	ARCHS4 Coexpression,1509;Enrichr Queries,603;GTEx Coexpression,1170	EFNA5,AURKB
gene_set_query	1391	RREB1	1094	ARCHS4 Coexpression,1120;Enrichr Queries,1246;GTEx Coexpression,916	AURKB
gene_set_query	1392	POU2F3	1095	ARCHS4 Coexpression,1565;Enrichr Queries,1126;GTEx Coexpression,593	AURKB
gene_set_query	1393	ZHX3	1095	ARCHS4 Coexpression,1318;Enrichr Queries,757;GTEx Coexpression,1210	ACSL1,AURKB
gene_set_query	1394	EMX1	1095	ARCHS4 Coexpression,1376;Enrichr Queries,507;GTEx Coexpression,1403	EFNA5,AURKB
gene_set_query	1395	FOXQ1	1096	ARCHS4 Coexpression,868;Enrichr Queries,1232;GTEx Coexpression,1187	SLC7A1,AURKB
gene_set_query	1396	DLX5	1097	ARCHS4 Coexpression,1439;Enrichr Queries,981;GTEx Coexpression,870	AURKB
gene_set_query	1397	ZNF540	1098	ARCHS4 Coexpression,1277;Enrichr Queries,1385;GTEx Coexpression,631
gene_set_query	1398	KLF12	1099	ARCHS4 Coexpression,1428;Enrichr Queries,361;GTEx Coexpression,1507	MARCKS,EFNA5,AURKB
gene_set_query	1399	PRDM6	1099	ARCHS4 Coexpression,1484;Enrichr Queries,541;GTEx Coexpression,1273	EFNA5,AURKB
gene_set_query	1400	FOXF1	1100	ARCHS4 Coexpression,1473;Enrichr Queries,1077;GTEx Coexpression,749	AURKB
gene_set_query	1401	LBX1	1100	ARCHS4 Coexpression,1208;Enrichr Queries,833;GTEx Coexpression,1259	AURKB
gene_set_query	1402	POU3F4	1100	ARCHS4 Coexpression,882;Enrichr Queries,1219;GTEx Coexpression,1199	MARCKS,AURKB
gene_set_query	1403	ZNF337	1100	ARCHS4 Coexpression,1146;Enrichr Queries,1377;GTEx Coexpression,777	AURKB
gene_set_query	1404	PRDM8	1101	ARCHS4 Coexpression,659;Enrichr Queries,1045;GTEx Coexpression,1599	TGFB1,AURKB
gene_set_query	1405	MZF1	1102	ARCHS4 Coexpression,1391;Enrichr Queries,319;GTEx Coexpression,1596	HMGA1,MYBL2,AURKB
gene_set_query	1406	HSF5	1102	ARCHS4 Coexpression,1160;Enrichr Queries,618;GTEx Coexpression,1529	SLC27A2,AURKB
gene_set_query	1407	FOXI2	1102	ARCHS4 Coexpression,1431;Enrichr Queries,916;GTEx Coexpression,960	AURKB
gene_set_query	1408	ZBTB14	1103	ARCHS4 Coexpression,1605;GTEx Coexpression,600
gene_set_query	1409	ZFP92	1103	ARCHS4 Coexpression,1339;Enrichr Queries,774;GTEx Coexpression,1195	SLC27A2,AURKB
gene_set_query	1410	ZNF585B	1103	ARCHS4 Coexpression,979;Enrichr Queries,1173;GTEx Coexpression,1156	ABCA9,AURKB
gene_set_query	1411	ZNF626	1103	ARCHS4 Coexpression,854;Enrichr Queries,946;GTEx Coexpression,1510	ABCA9,AURKB
gene_set_query	1412	TBX6	1104	ARCHS4 Coexpression,936;Enrichr Queries,1376;GTEx Coexpression,999	ABCA9,AURKB
gene_set_query	1413	ZNF543	1104	ARCHS4 Coexpression,1625;Enrichr Queries,1128;GTEx Coexpression,559	AURKB
gene_set_query	1414	ZNF883	1104	ARCHS4 Coexpression,625;GTEx Coexpression,1583	MARCKS
gene_set_query	1415	ZNF582	1104	ARCHS4 Coexpression,980;Enrichr Queries,1266;GTEx Coexpression,1066	DTYMK,AURKB
gene_set_query	1416	FEZF2	1105	ARCHS4 Coexpression,1463;Enrichr Queries,499;GTEx Coexpression,1354	EFNA5,AURKB
gene_set_query	1417	POU4F3	1106	ARCHS4 Coexpression,970;Enrichr Queries,839;GTEx Coexpression,1509	MYBL2,AURKB
gene_set_query	1418	HES2	1106	ARCHS4 Coexpression,1263;Enrichr Queries,1221;GTEx Coexpression,834	AURKB
gene_set_query	1419	TBX2	1111	ARCHS4 Coexpression,934;Enrichr Queries,1171;GTEx Coexpression,1229	ACSL5,AURKB
gene_set_query	1420	CENPB	1112	ARCHS4 Coexpression,1533;Enrichr Queries,269;GTEx Coexpression,1533	HMGA1,YWHAZ,AURKB
gene_set_query	1421	BPTF	1112	ARCHS4 Coexpression,1189;GTEx Coexpression,1035
gene_set_query	1422	MYF6	1113	ARCHS4 Coexpression,1155;Enrichr Queries,1029;GTEx Coexpression,1154	AURKB
gene_set_query	1423	ZNF256	1114	ARCHS4 Coexpression,1476;Enrichr Queries,1175;GTEx Coexpression,690	AURKB
gene_set_query	1424	ZNF436	1114	ARCHS4 Coexpression,1005;Enrichr Queries,1008;GTEx Coexpression,1329	MARCKS,AURKB
gene_set_query	1425	GSX1	1114	ARCHS4 Coexpression,1355;Enrichr Queries,844;GTEx Coexpression,1143	AURKB
gene_set_query	1426	ZMAT1	1116	ARCHS4 Coexpression,839;Enrichr Queries,1249;GTEx Coexpression,1260	ABCA9,AURKB
gene_set_query	1427	ZBTB20	1116	ARCHS4 Coexpression,763;Enrichr Queries,1036;GTEx Coexpression,1550	ABCA9,AURKB
gene_set_query	1428	RBCK1	1117	ARCHS4 Coexpression,647;GTEx Coexpression,1586	TGFB1
gene_set_query	1429	HES5	1117	ARCHS4 Coexpression,1136;Enrichr Queries,693;GTEx Coexpression,1523	AGXT,AURKB
gene_set_query	1430	ZNF708	1118	ARCHS4 Coexpression,1549;Enrichr Queries,1019;GTEx Coexpression,787	AURKB
gene_set_query	1431	EMX2	1120	ARCHS4 Coexpression,1034;Enrichr Queries,1169;GTEx Coexpression,1157	AURKB
gene_set_query	1432	PITX3	1120	ARCHS4 Coexpression,1044;Enrichr Queries,904;GTEx Coexpression,1413	AURKB
gene_set_query	1433	MYSM1	1123	ARCHS4 Coexpression,1414;Enrichr Queries,1184;GTEx Coexpression,770	AURKB
gene_set_query	1434	KLF7	1124	ARCHS4 Coexpression,1167;Enrichr Queries,722;GTEx Coexpression,1484	MARCKS,AURKB
gene_set_query	1435	MYF5	1125	ARCHS4 Coexpression,1145;Enrichr Queries,1003;GTEx Coexpression,1228	AURKB
gene_set_query	1436	TWIST1	1126	ARCHS4 Coexpression,1575;Enrichr Queries,1124;ReMap ChIP-seq,230;GTEx Coexpression,1573	TGFB1,TACC3,AURKB
gene_set_query	1437	SP9	1126	ARCHS4 Coexpression,1193;GTEx Coexpression,1058
gene_set_query	1438	ZNF653	1126	ARCHS4 Coexpression,1387;Enrichr Queries,1197;GTEx Coexpression,795	AURKB
gene_set_query	1439	ZNF211	1127	ARCHS4 Coexpression,571;Enrichr Queries,1318;GTEx Coexpression,1491	LONP2,AURKB
gene_set_query	1440	VSX2	1127	ARCHS4 Coexpression,1094;Enrichr Queries,847;GTEx Coexpression,1441	AURKB
gene_set_query	1441	ZNF821	1128	ARCHS4 Coexpression,1093;Enrichr Queries,1368;GTEx Coexpression,924	AURKB
gene_set_query	1442	ZNF491	1128	ARCHS4 Coexpression,1222;Enrichr Queries,1383;GTEx Coexpression,780
gene_set_query	1443	VAX1	1129	ARCHS4 Coexpression,1164;Enrichr Queries,865;GTEx Coexpression,1357	AURKB
gene_set_query	1444	ZKSCAN7	1129	ARCHS4 Coexpression,1127;GTEx Coexpression,1131
gene_set_query	1445	OVOL1	1129	ARCHS4 Coexpression,1105;Enrichr Queries,1273;GTEx Coexpression,1010	AURKB
gene_set_query	1446	ZNF781	1132	ARCHS4 Coexpression,1418;Enrichr Queries,1295;GTEx Coexpression,682	AURKB
gene_set_query	1447	ZFP28	1135	ARCHS4 Coexpression,1254;Enrichr Queries,1211;GTEx Coexpression,941	AURKB
gene_set_query	1448	ZNF446	1135	ARCHS4 Coexpression,1137;Enrichr Queries,1122;GTEx Coexpression,1147	AURKB
gene_set_query	1449	NFATC4	1136	ARCHS4 Coexpression,1361;Enrichr Queries,719;GTEx Coexpression,1328	MYBL2,AURKB
gene_set_query	1450	SCRT2	1137	ARCHS4 Coexpression,1326;Enrichr Queries,1392;GTEx Coexpression,693
gene_set_query	1451	ZNF233	1137	ARCHS4 Coexpression,784;Enrichr Queries,1206;GTEx Coexpression,1422	ABCA9,AURKB
gene_set_query	1452	MYT1	1137	ARCHS4 Coexpression,1410;Enrichr Queries,1349;GTEx Coexpression,653	AURKB
gene_set_query	1453	SKOR2	1141	ARCHS4 Coexpression,1460;GTEx Coexpression,821
gene_set_query	1454	NR1D1	1141	ARCHS4 Coexpression,1528;Enrichr Queries,1033;GTEx Coexpression,861	AURKB
gene_set_query	1455	RHOXF2B	1141	ARCHS4 Coexpression,972;Enrichr Queries,1356;GTEx Coexpression,1095	SNRPD1,AURKB
gene_set_query	1456	ZNF407	1141	ARCHS4 Coexpression,1602;Enrichr Queries,1286;GTEx Coexpression,536	AURKB
gene_set_query	1457	ZNF236	1142	ARCHS4 Coexpression,1074;Enrichr Queries,1298;GTEx Coexpression,1055	AURKB
gene_set_query	1458	ZNF595	1145	ARCHS4 Coexpression,1384;Enrichr Queries,905	AURKB
gene_set_query	1459	RBSN	1145	ARCHS4 Coexpression,926;GTEx Coexpression,1364	ABCA9
gene_set_query	1460	ZFHX2	1145	ARCHS4 Coexpression,1114;Enrichr Queries,1241;GTEx Coexpression,1081	AURKB
gene_set_query	1461	SOX30	1146	ARCHS4 Coexpression,1203;Enrichr Queries,879;GTEx Coexpression,1356	AURKB
gene_set_query	1462	POU6F1	1146	ARCHS4 Coexpression,1583;Enrichr Queries,1213;GTEx Coexpression,643	AURKB
gene_set_query	1463	RHOXF2	1147	ARCHS4 Coexpression,1000;Enrichr Queries,1100;GTEx Coexpression,1342	KIF2C,AURKB
gene_set_query	1464	ZNF627	1147	ARCHS4 Coexpression,1594;Enrichr Queries,621;GTEx Coexpression,1227	CKS2,AURKB
gene_set_query	1465	TBPL2	1149	ARCHS4 Coexpression,1578;GTEx Coexpression,720
gene_set_query	1466	ZNF17	1149	ARCHS4 Coexpression,1563;Enrichr Queries,664;GTEx Coexpression,1221	UBE2S,AURKB
gene_set_query	1467	SCMH1	1152	ARCHS4 Coexpression,892;GTEx Coexpression,1411	ILF3
gene_set_query	1468	ZNF572	1152	ARCHS4 Coexpression,547;Enrichr Queries,1327;GTEx Coexpression,1581	MYBL2,KIF11,AURKB
gene_set_query	1469	ZNF133	1152	ARCHS4 Coexpression,858;Enrichr Queries,1158;GTEx Coexpression,1439	TGFB1,AURKB
gene_set_query	1470	TBX18	1153	ARCHS4 Coexpression,1525;Enrichr Queries,532;GTEx Coexpression,1401	EFNA5,AURKB
gene_set_query	1471	ZNF331	1153	ARCHS4 Coexpression,1087;Enrichr Queries,856;GTEx Coexpression,1516	AURKB
gene_set_query	1472	FOXD4L3	1154	ARCHS4 Coexpression,1080;Enrichr Queries,1401;GTEx Coexpression,981
gene_set_query	1473	HSFY1	1155	ARCHS4 Coexpression,1067;GTEx Coexpression,1242
gene_set_query	1474	ZNF135	1155	ARCHS4 Coexpression,977;Enrichr Queries,1242;GTEx Coexpression,1245	MARCKS,AURKB
gene_set_query	1475	ZNF136	1155	ARCHS4 Coexpression,1117;Enrichr Queries,963;GTEx Coexpression,1385	AURKB
gene_set_query	1476	ZNF2	1156	ARCHS4 Coexpression,1027;Enrichr Queries,1284	AURKB
gene_set_query	1477	ZNF699	1158	ARCHS4 Coexpression,931;Enrichr Queries,1041;GTEx Coexpression,1502	ABCA9,AURKB
gene_set_query	1478	DMRT2	1158	ARCHS4 Coexpression,1043;Enrichr Queries,1132;GTEx Coexpression,1300	AURKB
gene_set_query	1479	ZNF408	1159	ARCHS4 Coexpression,914;Enrichr Queries,1227;GTEx Coexpression,1337	DDX39A,AURKB
gene_set_query	1480	ZNF528	1160	ARCHS4 Coexpression,1008;Enrichr Queries,1163;GTEx Coexpression,1308	ABCA9,AURKB
gene_set_query	1481	HOXD1	1160	ARCHS4 Coexpression,1240;Enrichr Queries,910;GTEx Coexpression,1330	AURKB
gene_set_query	1482	SCML4	1160	ARCHS4 Coexpression,1366;Enrichr Queries,1367;GTEx Coexpression,748	AURKB
gene_set_query	1483	ZNF284	1160	ARCHS4 Coexpression,1501;Enrichr Queries,1145;GTEx Coexpression,835	AURKB
gene_set_query	1484	ZNF737	1161	ARCHS4 Coexpression,1294;GTEx Coexpression,1027
gene_set_query	1485	ZNF487	1162	ARCHS4 Coexpression,798;Enrichr Queries,1130;GTEx Coexpression,1557	ABCA9,AURKB
gene_set_query	1486	ARNT2	1162	ARCHS4 Coexpression,1507;Enrichr Queries,991;GTEx Coexpression,988	AURKB
gene_set_query	1487	MYT1L	1163	ARCHS4 Coexpression,1083;Enrichr Queries,1384;GTEx Coexpression,1022
gene_set_query	1488	NEUROD4	1169	ARCHS4 Coexpression,1592;Enrichr Queries,698;GTEx Coexpression,1216	EFNA5,AURKB
gene_set_query	1489	ZNF683	1171	ARCHS4 Coexpression,1177;Enrichr Queries,832;GTEx Coexpression,1503	AURKB
gene_set_query	1490	AHDC1	1171	ARCHS4 Coexpression,1552;Enrichr Queries,1170;GTEx Coexpression,792	AURKB
gene_set_query	1491	NKX22	1172	ARCHS4 Coexpression,1235;GTEx Coexpression,1108
gene_set_query	1492	HEY2	1173	ARCHS4 Coexpression,886;Enrichr Queries,1123;GTEx Coexpression,1511	CKS2,AURKB
gene_set_query	1493	JAZF1	1175	ARCHS4 Coexpression,1347;Enrichr Queries,599;GTEx Coexpression,1579	EFNA5,AURKB
gene_set_query	1494	CXXC5	1175	ARCHS4 Coexpression,1475;GTEx Coexpression,875
gene_set_query	1495	ZNF706	1178	ARCHS4 Coexpression,1402;Enrichr Queries,1261;GTEx Coexpression,871	YWHAZ
gene_set_query	1496	MAFA	1180	ARCHS4 Coexpression,1109;Enrichr Queries,1099;GTEx Coexpression,1331	AURKB
gene_set_query	1497	ZNF34	1181	ARCHS4 Coexpression,1148;Enrichr Queries,1084;GTEx Coexpression,1310	AURKB
gene_set_query	1498	ZNF610	1181	ARCHS4 Coexpression,1435;Enrichr Queries,1371;GTEx Coexpression,738	AURKB
gene_set_query	1499	ZNF536	1182	ARCHS4 Coexpression,1200;Enrichr Queries,1180;GTEx Coexpression,1165	AURKB
gene_set_query	1500	ZNF154	1182	ARCHS4 Coexpression,750;Enrichr Queries,1268;GTEx Coexpression,1527	ABCA9,AURKB
gene_set_query	1501	THAP8	1185	ARCHS4 Coexpression,865;Enrichr Queries,1339;GTEx Coexpression,1352	DTYMK,AURKB
gene_set_query	1502	GLI4	1186	ARCHS4 Coexpression,789;GTEx Coexpression,1582	TGFB1
gene_set_query	1503	CAMTA2	1187	ARCHS4 Coexpression,1522;Enrichr Queries,1363;GTEx Coexpression,676	AURKB
gene_set_query	1504	ZNF616	1189	ARCHS4 Coexpression,1589;Enrichr Queries,525;GTEx Coexpression,1452	ACSL1,AURKB
gene_set_query	1505	ZNF843	1191	ARCHS4 Coexpression,1306;Enrichr Queries,1189;GTEx Coexpression,1078	AURKB
gene_set_query	1506	ZNF362	1192	ARCHS4 Coexpression,1508;Enrichr Queries,1027;GTEx Coexpression,1040	AURKB
gene_set_query	1507	FAM170A	1193	ARCHS4 Coexpression,1462;Enrichr Queries,705;GTEx Coexpression,1412	EFNA5,AURKB
gene_set_query	1508	ZFP82	1194	ARCHS4 Coexpression,1584;Enrichr Queries,1007;GTEx Coexpression,991	AURKB
gene_set_query	1509	OLIG1	1198	ARCHS4 Coexpression,1626;Enrichr Queries,543;GTEx Coexpression,1425	AGXT,AURKB
gene_set_query	1510	ZNF630	1199	ARCHS4 Coexpression,967;GTEx Coexpression,1431	ABCA9
gene_set_query	1511	ZNF775	1203	ARCHS4 Coexpression,1313;Enrichr Queries,1056;GTEx Coexpression,1240	AURKB
gene_set_query	1512	NKX21	1204	ARCHS4 Coexpression,1444;GTEx Coexpression,963
gene_set_query	1513	ZNF879	1206	ARCHS4 Coexpression,1490;GTEx Coexpression,921
gene_set_query	1514	ZNF182	1209	ARCHS4 Coexpression,808;Enrichr Queries,1254;GTEx Coexpression,1564	AQP9,AURKB
gene_set_query	1515	ZNF292	1214	ARCHS4 Coexpression,1176;Enrichr Queries,1245;GTEx Coexpression,1222	AURKB
gene_set_query	1516	ZBTB18	1215	ARCHS4 Coexpression,1561;GTEx Coexpression,868
gene_set_query	1517	ZSCAN26	1215	ARCHS4 Coexpression,1454;GTEx Coexpression,976
gene_set_query	1518	SGSM2	1216	ARCHS4 Coexpression,1513;GTEx Coexpression,918
gene_set_query	1519	NR2C1	1216	ARCHS4 Coexpression,1572;Enrichr Queries,1247;GTEx Coexpression,829	AURKB
gene_set_query	1520	ZNF555	1219	ARCHS4 Coexpression,1010;Enrichr Queries,1342;GTEx Coexpression,1304	ABCA9,AURKB
gene_set_query	1521	SHOX	1220	ARCHS4 Coexpression,1390;Enrichr Queries,1034;GTEx Coexpression,1235	AURKB
gene_set_query	1522	ZNF320	1221	ARCHS4 Coexpression,1319;Enrichr Queries,1212;GTEx Coexpression,1132	AURKB
gene_set_query	1523	SOX3	1221	ARCHS4 Coexpression,1215;Enrichr Queries,1074;GTEx Coexpression,1375	AURKB
gene_set_query	1524	ZNF599	1222	ARCHS4 Coexpression,932;Enrichr Queries,1282;GTEx Coexpression,1451	ABCA9,AURKB
gene_set_query	1525	ZNF41	1223	ARCHS4 Coexpression,1122;Enrichr Queries,1258;GTEx Coexpression,1289	AURKB
gene_set_query	1526	ZSCAN1	1223	ARCHS4 Coexpression,1046;Enrichr Queries,1331;GTEx Coexpression,1293	AURKB
gene_set_query	1527	DMTF1	1225	ARCHS4 Coexpression,1047;Enrichr Queries,1103;GTEx Coexpression,1524	AURKB
gene_set_query	1528	HSFX2	1225	ARCHS4 Coexpression,1225
gene_set_query	1529	SPZ1	1228	ARCHS4 Coexpression,1077;GTEx Coexpression,1378
gene_set_query	1530	POU6F2	1229	ARCHS4 Coexpression,898;Enrichr Queries,1346;GTEx Coexpression,1443	ABCA9,EFNA5
gene_set_query	1531	ESX1	1230	ARCHS4 Coexpression,1627;Enrichr Queries,890;GTEx Coexpression,1174	AURKB
gene_set_query	1532	MSX1	1232	ARCHS4 Coexpression,1004;Enrichr Queries,1107;GTEx Coexpression,1584	SNRPD1,AURKB
gene_set_query	1533	EVX2	1235	ARCHS4 Coexpression,1321;Enrichr Queries,835;GTEx Coexpression,1549	AURKB
gene_set_query	1534	ZBTB41	1237	ARCHS4 Coexpression,1554;Enrichr Queries,1309;GTEx Coexpression,847	AURKB
gene_set_query	1535	ZNF81	1238	ARCHS4 Coexpression,1573;Enrichr Queries,1223;GTEx Coexpression,917	AURKB
gene_set_query	1536	CENPBD1	1238	ARCHS4 Coexpression,1301;GTEx Coexpression,1175
gene_set_query	1537	ZBTB43	1239	ARCHS4 Coexpression,1485;Enrichr Queries,689;GTEx Coexpression,1542	ACSL1,AURKB
gene_set_query	1538	FOXL1	1239	ARCHS4 Coexpression,1542;Enrichr Queries,737;GTEx Coexpression,1438	EFNA5,AURKB
gene_set_query	1539	ZNF654	1240	ARCHS4 Coexpression,1600;Enrichr Queries,1073;GTEx Coexpression,1048	AURKB
gene_set_query	1540	ZNF287	1242	ARCHS4 Coexpression,1374;Enrichr Queries,1117;GTEx Coexpression,1234	AURKB
gene_set_query	1541	DACH2	1243	ARCHS4 Coexpression,1103;Enrichr Queries,1344;GTEx Coexpression,1282	AURKB
gene_set_query	1542	MKX	1244	ARCHS4 Coexpression,1559;Enrichr Queries,572;GTEx Coexpression,1600	EFNA5,AURKB
gene_set_query	1543	ZNF181	1247	ARCHS4 Coexpression,1481;Enrichr Queries,1400;GTEx Coexpression,860
gene_set_query	1544	ZNF418	1247	ARCHS4 Coexpression,1471;Enrichr Queries,953;GTEx Coexpression,1318	AURKB
gene_set_query	1545	ZBTB6	1248	ARCHS4 Coexpression,1076;Enrichr Queries,1397;GTEx Coexpression,1270
gene_set_query	1546	ZNF451	1249	ARCHS4 Coexpression,1468;Enrichr Queries,1143;GTEx Coexpression,1135	AURKB
gene_set_query	1547	DBX2	1249	ARCHS4 Coexpression,1610;Enrichr Queries,675;GTEx Coexpression,1462	AGXT,AURKB
gene_set_query	1548	ZNF71	1249	ARCHS4 Coexpression,1220;Enrichr Queries,1386;GTEx Coexpression,1141
gene_set_query	1549	ZNF677	1251	ARCHS4 Coexpression,1040;Enrichr Queries,1325;GTEx Coexpression,1388	AURKB
gene_set_query	1550	ZNF454	1253	ARCHS4 Coexpression,1242;Enrichr Queries,1345;GTEx Coexpression,1171	AURKB
gene_set_query	1551	POU1F1	1254	ARCHS4 Coexpression,1516;Enrichr Queries,1049;GTEx Coexpression,1198	AURKB
gene_set_query	1552	TGIF2LX	1255	ARCHS4 Coexpression,958;Enrichr Queries,1217;GTEx Coexpression,1589	TROAP,HMGA1
gene_set_query	1553	ZNF852	1255	ARCHS4 Coexpression,1612;GTEx Coexpression,898
gene_set_query	1554	LHX8	1257	ARCHS4 Coexpression,1314;Enrichr Queries,976;GTEx Coexpression,1482	AURKB
gene_set_query	1555	MSANTD4	1261	ARCHS4 Coexpression,954;GTEx Coexpression,1568	TGFB1
gene_set_query	1556	NR2E1	1262	ARCHS4 Coexpression,1467;Enrichr Queries,911;GTEx Coexpression,1407	AURKB
gene_set_query	1557	ZNF354C	1264	ARCHS4 Coexpression,1333;Enrichr Queries,1185;GTEx Coexpression,1274	AURKB
gene_set_query	1558	DLX1	1265	ARCHS4 Coexpression,1341;Enrichr Queries,1057;GTEx Coexpression,1396	AURKB
gene_set_query	1559	ZGLP1	1265	ARCHS4 Coexpression,1557;GTEx Coexpression,973
gene_set_query	1560	ZNF253	1268	ARCHS4 Coexpression,1531;Enrichr Queries,1253;GTEx Coexpression,1019	AURKB
gene_set_query	1561	HOXC8	1269	ARCHS4 Coexpression,1209;Enrichr Queries,1009;GTEx Coexpression,1588	AURKB
gene_set_query	1562	ZXDC	1269	ARCHS4 Coexpression,1287;Enrichr Queries,1269;GTEx Coexpression,1251	AURKB
gene_set_query	1563	ZNF571	1272	ARCHS4 Coexpression,1324;Enrichr Queries,1236;GTEx Coexpression,1257	AURKB
gene_set_query	1564	ZNF225	1274	ARCHS4 Coexpression,1204;GTEx Coexpression,1344
gene_set_query	1565	ZNF705B	1278	ARCHS4 Coexpression,1061;GTEx Coexpression,1494
gene_set_query	1566	CCDC169SOHLH2	1278	ARCHS4 Coexpression,1278
gene_set_query	1567	ZNF835	1280	ARCHS4 Coexpression,1568;Enrichr Queries,1110;GTEx Coexpression,1161	AURKB
gene_set_query	1568	RLF	1280	ARCHS4 Coexpression,1608;Enrichr Queries,1365;GTEx Coexpression,867	AURKB
gene_set_query	1569	HSF4	1292	ARCHS4 Coexpression,1556;Enrichr Queries,752;GTEx Coexpression,1567	CYP27A1,AURKB
gene_set_query	1570	ZBTB47	1292	ARCHS4 Coexpression,1311;Enrichr Queries,1044;GTEx Coexpression,1520	AURKB
gene_set_query	1571	HEYL	1292	ARCHS4 Coexpression,1147;Enrichr Queries,1237;GTEx Coexpression,1492	AURKB
gene_set_query	1572	ZNF836	1292	ARCHS4 Coexpression,1283;Enrichr Queries,1138;GTEx Coexpression,1456	AURKB
gene_set_query	1573	ZNF28	1293	ARCHS4 Coexpression,1521;Enrichr Queries,792;GTEx Coexpression,1565	YWHAZ,AURKB
gene_set_query	1574	FOSB	1298	ARCHS4 Coexpression,1421;Enrichr Queries,1195;GTEx Coexpression,1279	AURKB
gene_set_query	1575	ZNF433	1304	ARCHS4 Coexpression,1470;Enrichr Queries,1006;GTEx Coexpression,1436	AURKB
gene_set_query	1576	HOXD8	1306	ARCHS4 Coexpression,1517;Enrichr Queries,936;GTEx Coexpression,1465	AURKB
gene_set_query	1577	ZBTB1	1309	ARCHS4 Coexpression,1394;Enrichr Queries,1290;GTEx Coexpression,1243	AURKB
gene_set_query	1578	ZNF705D	1309	ARCHS4 Coexpression,1386;Enrichr Queries,1193;GTEx Coexpression,1348	HSD17B6
gene_set_query	1579	BCL6B	1311	ARCHS4 Coexpression,1617;Enrichr Queries,1020;GTEx Coexpression,1297	AURKB
gene_set_query	1580	BSX	1313	ARCHS4 Coexpression,1290;Enrichr Queries,1403;GTEx Coexpression,1246
gene_set_query	1581	ZNF718	1315	ARCHS4 Coexpression,1624;Enrichr Queries,826;GTEx Coexpression,1496	SLC7A1,AURKB
gene_set_query	1582	ZNF268	1316	ARCHS4 Coexpression,1401;Enrichr Queries,975;GTEx Coexpression,1572	AURKB
gene_set_query	1583	ZNF623	1321	ARCHS4 Coexpression,1181;Enrichr Queries,1336;GTEx Coexpression,1445	AURKB
gene_set_query	1584	ZNF250	1321	ARCHS4 Coexpression,1440;Enrichr Queries,1136;GTEx Coexpression,1387	AURKB
gene_set_query	1585	NKX11	1325	ARCHS4 Coexpression,1413;GTEx Coexpression,1236
gene_set_query	1586	CPXCR1	1331	ARCHS4 Coexpression,1102;Enrichr Queries,1357;GTEx Coexpression,1534	HAO1
gene_set_query	1587	SCX	1336	ARCHS4 Coexpression,1336
gene_set_query	1588	PEG3	1340	ARCHS4 Coexpression,1358;GTEx Coexpression,1321
gene_set_query	1589	ZNF479	1340	ARCHS4 Coexpression,1489;Enrichr Queries,1000;GTEx Coexpression,1531	AURKB
gene_set_query	1590	FOXS1	1341	ARCHS4 Coexpression,1571;Enrichr Queries,922;GTEx Coexpression,1530	AURKB
gene_set_query	1591	ZNF395	1344	ARCHS4 Coexpression,1365;Enrichr Queries,1207;GTEx Coexpression,1460	AURKB
gene_set_query	1592	ZNF397	1346	ARCHS4 Coexpression,1396;GTEx Coexpression,1296
gene_set_query	1593	ZNF800	1347	ARCHS4 Coexpression,1486;Enrichr Queries,1306;GTEx Coexpression,1249	AURKB
gene_set_query	1594	PRRX1	1349	ARCHS4 Coexpression,1488;Enrichr Queries,962;GTEx Coexpression,1598	AURKB
gene_set_query	1595	MTERF4	1358	ARCHS4 Coexpression,1218;GTEx Coexpression,1498
gene_set_query	1596	CBLL2	1358	ARCHS4 Coexpression,1234;Enrichr Queries,1244;GTEx Coexpression,1597	YWHAZ
gene_set_query	1597	ZBTB44	1362	ARCHS4 Coexpression,1443;Enrichr Queries,1315;GTEx Coexpression,1327	AURKB
gene_set_query	1598	ZNF700	1365	ARCHS4 Coexpression,1527;Enrichr Queries,1285;GTEx Coexpression,1284	AURKB
gene_set_query	1599	FOXC2	1379	ARCHS4 Coexpression,1495;Enrichr Queries,1068;GTEx Coexpression,1574	AURKB
gene_set_query	1600	ZIM2	1382	ARCHS4 Coexpression,1186;Enrichr Queries,1353;GTEx Coexpression,1606	AURKB
gene_set_query	1601	MEIS3	1390	ARCHS4 Coexpression,1597;Enrichr Queries,1210;GTEx Coexpression,1363	AURKB
gene_set_query	1602	PHF20	1391	ARCHS4 Coexpression,1500;Enrichr Queries,1374;GTEx Coexpression,1298	AURKB
gene_set_query	1603	ZNF229	1391	ARCHS4 Coexpression,1478;Enrichr Queries,1304	AURKB
gene_set_query	1604	ZNF358	1391	ARCHS4 Coexpression,1539;Enrichr Queries,1076;GTEx Coexpression,1558	AURKB
gene_set_query	1605	MYRF	1394	ARCHS4 Coexpression,1406;GTEx Coexpression,1382
gene_set_query	1606	ZNF816	1401	ARCHS4 Coexpression,1613;GTEx Coexpression,1188
gene_set_query	1607	OSR1	1403	ARCHS4 Coexpression,1598;GTEx Coexpression,1208
gene_set_query	1608	DRGX	1404	ARCHS4 Coexpression,1224;Enrichr Queries,1395;GTEx Coexpression,1592
gene_set_query	1609	TBR1	1408	ARCHS4 Coexpression,1385;Enrichr Queries,1391;GTEx Coexpression,1447
gene_set_query	1610	KCNIP3	1410	ARCHS4 Coexpression,1466;GTEx Coexpression,1353
gene_set_query	1611	SOHLH1	1411	ARCHS4 Coexpression,1450;Enrichr Queries,1279;GTEx Coexpression,1504	AURKB
gene_set_query	1612	CGGBP1	1412	ARCHS4 Coexpression,1286;GTEx Coexpression,1537
gene_set_query	1613	BHLHA9	1413	ARCHS4 Coexpression,1422;GTEx Coexpression,1404
gene_set_query	1614	PRRX2	1418	ARCHS4 Coexpression,1588;Enrichr Queries,1071;GTEx Coexpression,1595	AURKB
gene_set_query	1615	NEUROD6	1419	ARCHS4 Coexpression,1436;Enrichr Queries,1389;GTEx Coexpression,1433
gene_set_query	1616	FLYWCH1	1422	ARCHS4 Coexpression,1596;GTEx Coexpression,1248
gene_set_query	1617	SKI	1432	ARCHS4 Coexpression,1529;GTEx Coexpression,1335
gene_set_query	1618	ZNF578	1443	ARCHS4 Coexpression,1566;Enrichr Queries,1314;GTEx Coexpression,1450	AURKB
gene_set_query	1619	ZSCAN12	1448	ARCHS4 Coexpression,1581;Enrichr Queries,1305;GTEx Coexpression,1459	AURKB
gene_set_query	1620	SCRT1	1461	ARCHS4 Coexpression,1541;Enrichr Queries,1381
gene_set_query	1621	AEBP1	1475	ARCHS4 Coexpression,1453;GTEx Coexpression,1497
gene_set_query	1622	ZNF880	1475	ARCHS4 Coexpression,1357;GTEx Coexpression,1593
gene_set_query	1623	SOX8	1477	ARCHS4 Coexpression,1609;Enrichr Queries,1231;GTEx Coexpression,1591	AURKB
gene_set_query	1624	ANKZF1	1488	ARCHS4 Coexpression,1510;Enrichr Queries,1378;GTEx Coexpression,1577	AURKB
gene_set_query	1625	ZNF853	1504	ARCHS4 Coexpression,1482;GTEx Coexpression,1526
gene_set_query	1626	NKX62	1505	ARCHS4 Coexpression,1586;GTEx Coexpression,1424
gene_set_query	1627	MSANTD3	1533	ARCHS4 Coexpression,1579;GTEx Coexpression,1487
gene_set_query	1628	NACC2	1545	ARCHS4 Coexpression,1553;GTEx Coexpression,1536
gene_set_query	1629	ZBED6	1545	ARCHS4 Coexpression,1545
gene_set_query	1630	TWIST2	1546	ARCHS4 Coexpression,1502;GTEx Coexpression,1590
gene_set_query	1631	ZNF469	1550	ARCHS4 Coexpression,1558;GTEx Coexpression,1541
gene_set_query	1632	CC2D1A	1556	ARCHS4 Coexpression,1543;GTEx Coexpression,1569
