# Supplementary material for: Establishment and Validation of Novel Prognostic Subtypes in Hepatocellular Carcinoma Based on Bile Acid Metabolism Gene Signatures Using Bulk and Single-Cell RNA-Seq Data
Source: Int J Mol Sci. 2024 Jan 11;25(2):919. doi: 10.3390/ijms25020919 (PMC10815120; doi:10.3390/ijms25020919)
Supplement: Supplementary file 1 [file ijms-25-00919-s001.zip › Table S6.xlsx]

## Sheet: Table S6
Supplementary Table S6: Datasets detailed information
Tissue transcriptiome
Datasets	Tumor samples	Non-tumor samples	Tumor samples with survival information
TCGA-LIHC	374	50	368
ICGC-LIRI	231	-	231
GSE14520	225	220	221
GSE25097	268	243	-
GSE36376	240	193	-
Single cell transcriptome
Datasets	Samples	Samples after screened	Tumor cells
GSE149614	HCC: T (10); N (8); L (1); P (2)	21 HCC	30694
GSE151530	HCC (32); iCCA (14)	14 HCC	36924
GSE156625	HCC (57); normal liver (1); fetal liver (8); Mouse liver (12)	14 HCC	57254
HCC: hepatocellular carcinoma, T: primary tumor tissue, N: non-tumor tissue, L: metastatic lymph node, P: portal vein tumor thrombus; iCCA: intrahepatic cholangiocarcinoma
