# Supplementary material for: Establishment and Validation of Novel Prognostic Subtypes in Hepatocellular Carcinoma Based on Bile Acid Metabolism Gene Signatures Using Bulk and Single-Cell RNA-Seq Data
Source: Int J Mol Sci. 2024 Jan 11;25(2):919. doi: 10.3390/ijms25020919 (PMC10815120; doi:10.3390/ijms25020919)
Supplement: Supplementary file 1 [file ijms-25-00919-s001.zip › Table S7.xlsx]

## Sheet: Table S7
Supplementary Table S7: Signatures for calculating ssGSEA score to explore the correlation of distinctive characterization between subtypes
Signatures	Genes										References
Glycolysis	GCK	GCKR	GPI								DOI: 10.1016/j.jhep.2017.05.014
Gluconeogenesis	FBP1	PCK1	PCK2
Fatty acid synthesis	ACACA	ACLY	FADS1	FADS2	FASN	ME1
BSC (bile salts efflux into canaliculi)	ABCB11	ABCG2	ABCB4	ABCC2	ABCB1	SLC01B3
BSB (bile salts efflux into blood flow)	ABCC1	ABCC3	ABCC4
Angiogenesis	ANGPT1	ANGPT2	VEGFA
Cell proliferation	MKI67	RRM2	AURKA	EZH2
Wnt/β-catenin pathway	GLUL	LGR5	TBX3
Progenitor	KRT19	EPCAM	SOX9	SALL4	ALDH1A	CD44	CD24	KRT7	CD133	THY1
TGFβ pathway	TGFB1	TGFBR1	SMAD4	VIM
STEM	AFP	EPCAM	KRT19	PROM1	SOX9	DKK1	CD44				DOI: 10.1002/hep.29254
ECM	VCAN	TNC	LAMC1	TGFB1	VIM
PV	AQP9	LEF1	OAT	CYP2E1	CYP1A2	SLC1A2
PP	GLS2	FBP1	FGA	ALDOB	ALB	CDH1	EGFR	AQP8
		10.1016/j.immuni.2013.10.003
		10.1186/s13059-015-0620-6
		10.1038/ng.3398
		10.1073/pnas.1810580115
		10.1016/j.cell.2015.05.044
