# Supplementary material for: Establishment and Validation of Novel Prognostic Subtypes in Hepatocellular Carcinoma Based on Bile Acid Metabolism Gene Signatures Using Bulk and Single-Cell RNA-Seq Data
Source: Int J Mol Sci. 2024 Jan 11;25(2):919. doi: 10.3390/ijms25020919 (PMC10815120; doi:10.3390/ijms25020919)
Supplement: Supplementary file 1 [file ijms-25-00919-s001.zip › Table S8.xlsx]

## Sheet: Table S8
Supplementary Table S8: qRT-PCR primer sequence8
Genes	Sequence
GAPDH-F	ACGGATTTGGTCGTATTGGG
GAPDH-R	CGCTCCTGGAAGATGGTGAT
Cell cycle-related genes
PLK1-F	TGACTCAACACGCCTCATCC
PLK1-R	GCTCGCTCATGTAATTGCGG
UBE2C-F	GACCTGAGGTATAAGCTCTCGC
UBE2C-R	CAGGGCAGACCACTTTTCCTT
BUB1-F	CGGCTTCTAGTTTGCGGTTC
BUB1-R	AGGGTCATTGCCCTTGTAGC
CDC20-F	CGCTATATCCCCCATCGCAG
CDC20-R	GATGTTCCTTCTTGGTGGGC
BIRC5-F	CAACCGGACGAATGCTTTT
BIRC5-R	AAGAACTGGCCCTTCTTGGA
CDK16-F	TCCGTCGTGTCAGCCTATCT
CDK16-R	TCATGTTCCAGTCTGATCTCCTT
AURKB-F	CAGTGGGACACCCGACATC
AURKB-R	GTACACGTTTCCAAACTTGCC
Bile acid metabolism-related genes
SLC27A5-F	CATGGCGTGACAGTGATCCT
SLC27A5-R	CAGCCCGTAGTCCATTGCC
SLC10A1-F	GGCCGTCACAGTTCTCTCTG
SLC10A1-R	GGTGGCAATCAAGAGTGGTGT
CYP7A1-F	CCATAAGGTGTTGTGCCACGGAAA
CYP7A1-R	GCCCAAATGCCTTCGCAGAAG
CYP39A1-F	CTTCAGCGGAAGAATTTGCGT
CYP39A1-R	AAAGGTCATTCGGTTTCCCATAG
CYP7B1-F	AAAACCACAAGTTGGGACACG
CYP7B1-R	GAAGCTCAATGGGTATGTTGGAT
