# Supplementary figures and images for: Establishment and Validation of Novel Prognostic Subtypes in Hepatocellular Carcinoma Based on Bile Acid Metabolism Gene Signatures Using Bulk and Single-Cell RNA-Seq Data
Source: MDPI journal article supplement (doi:10.3390/ijms25020919), 2024-01-11

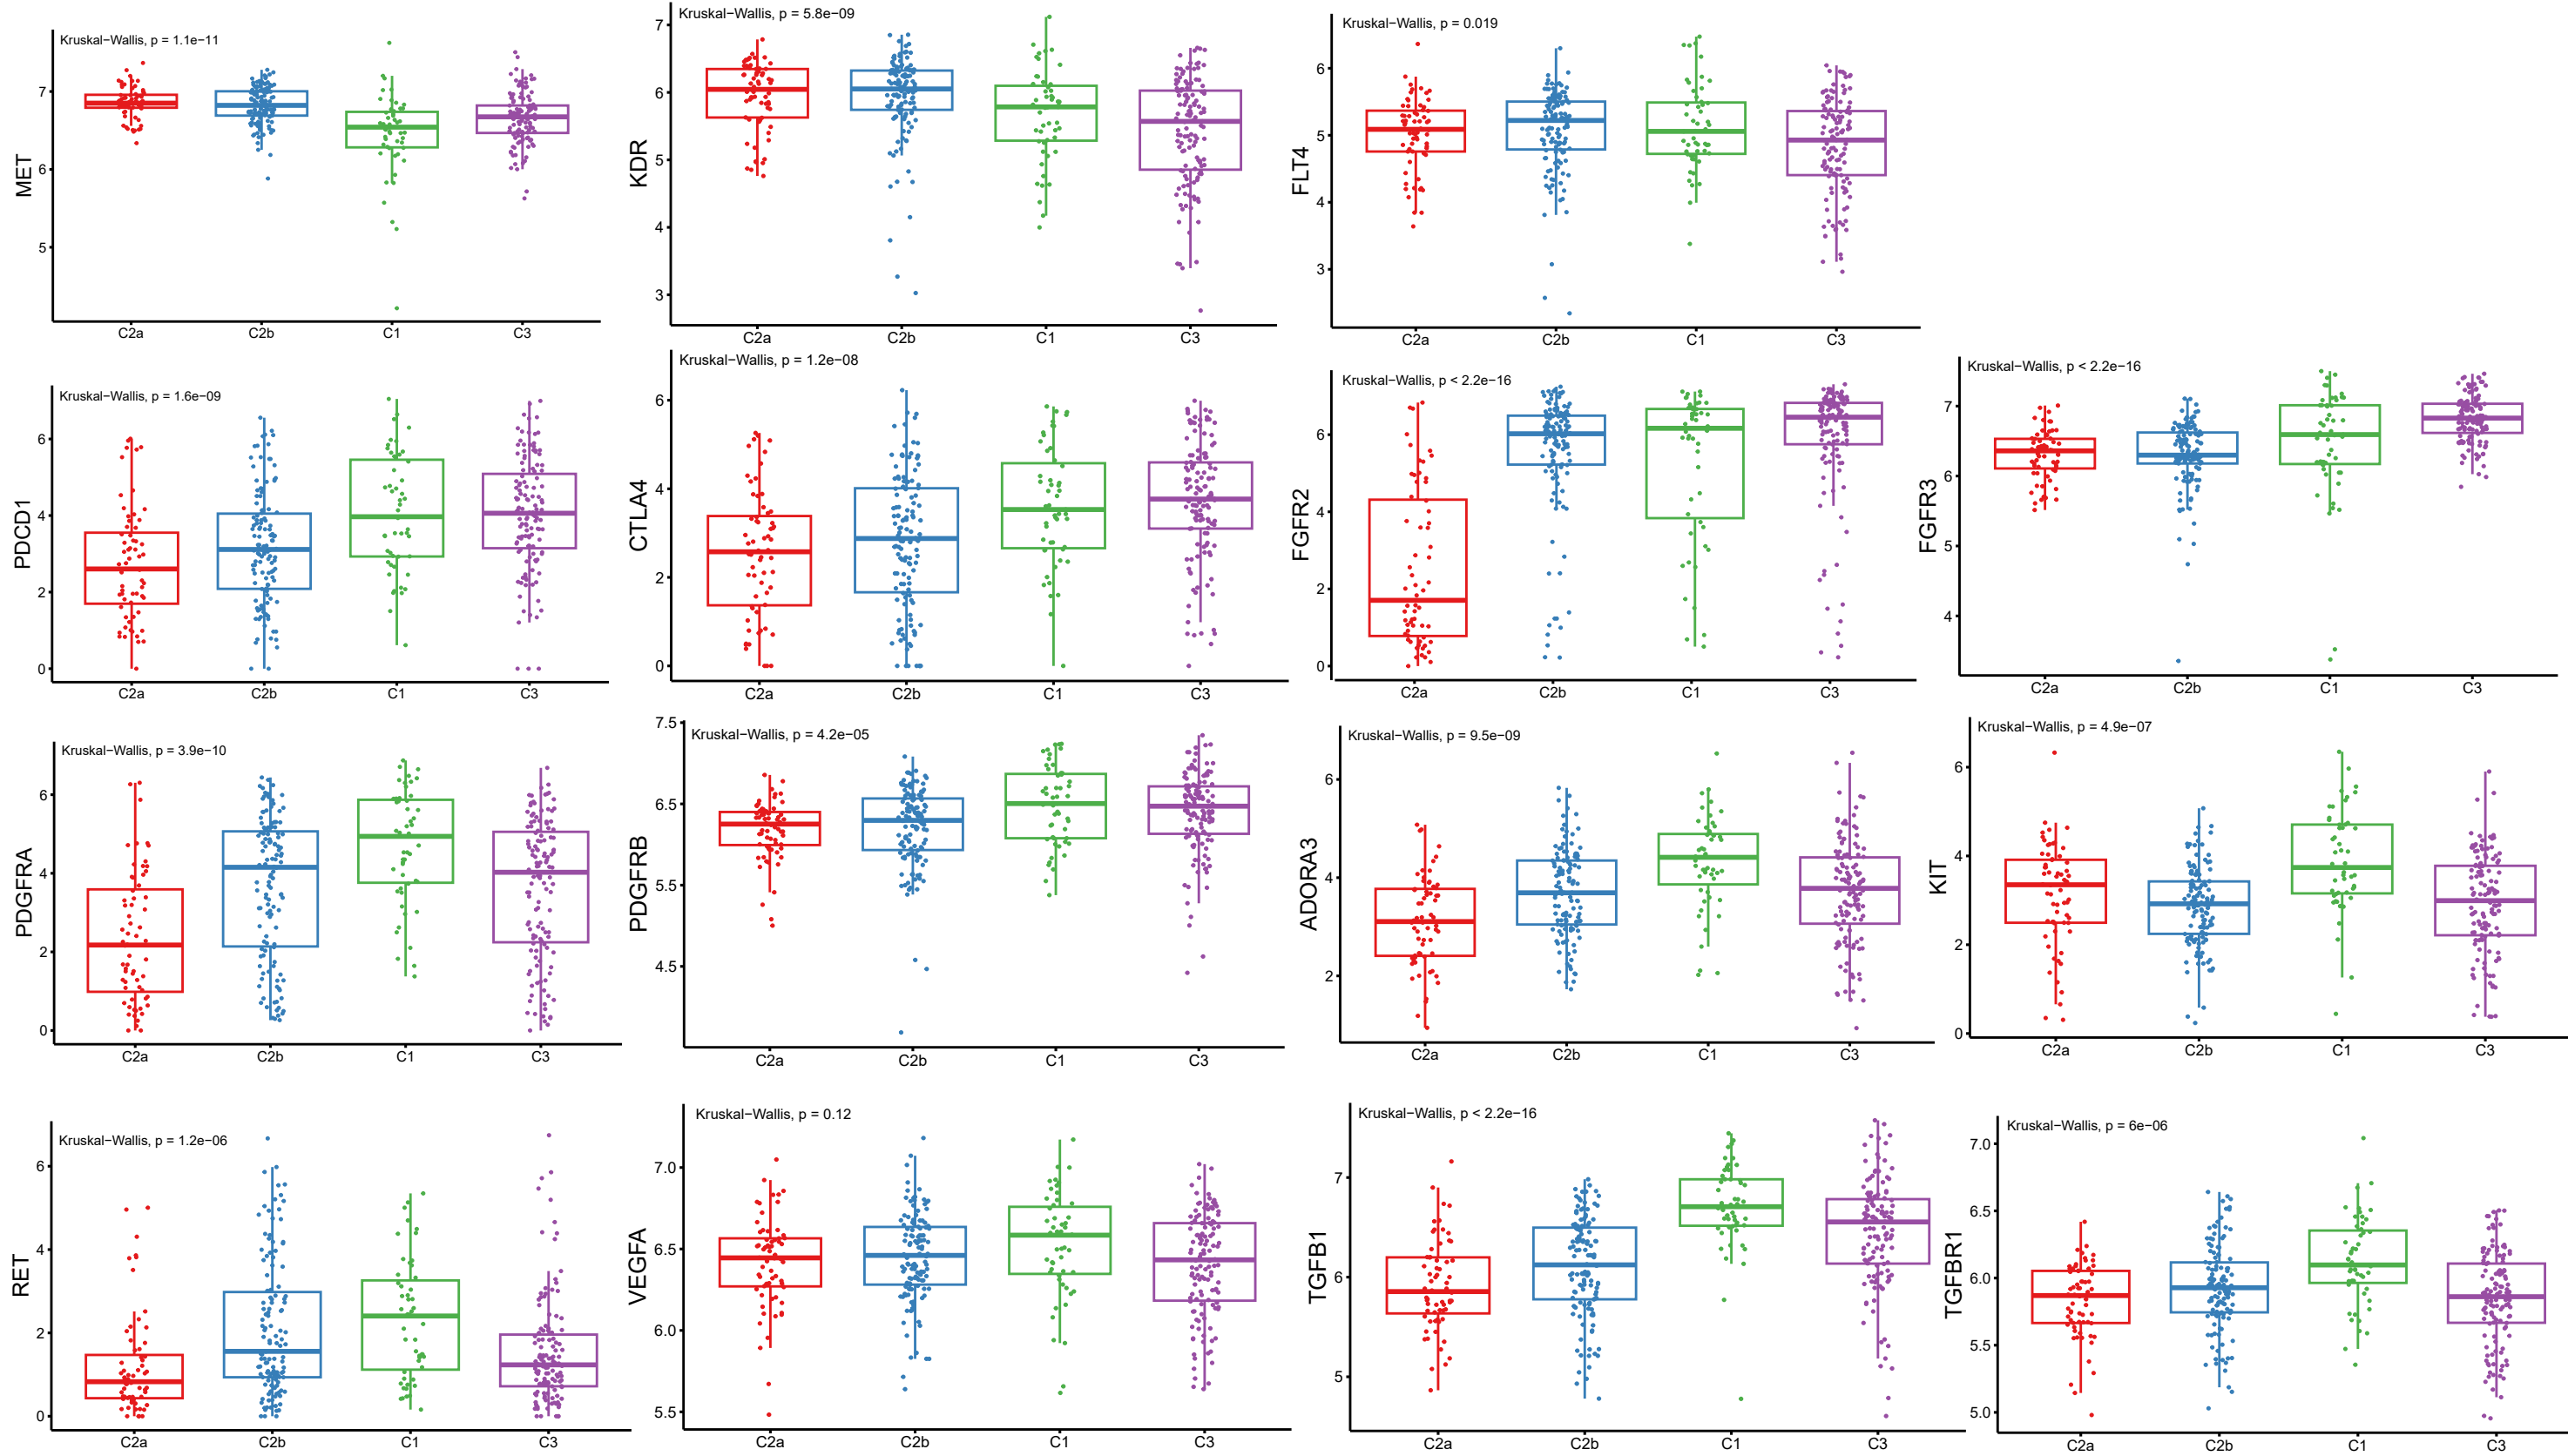

Supplement: s1 [file s1]

**A**

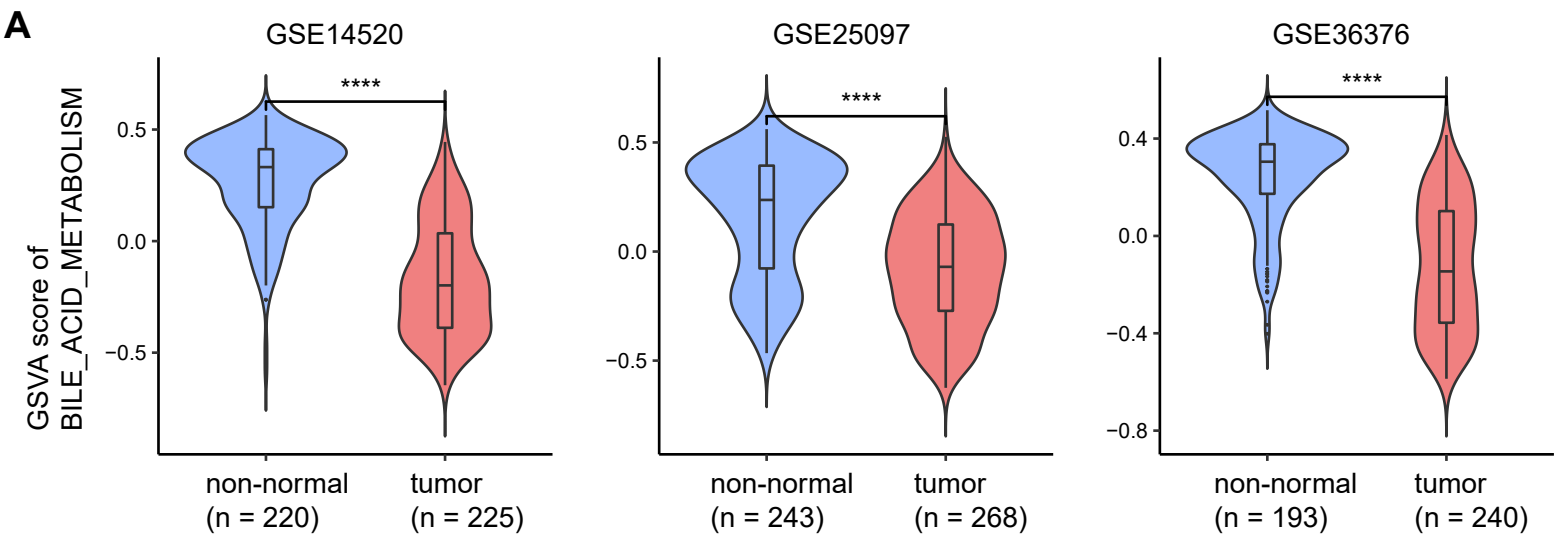

**B**

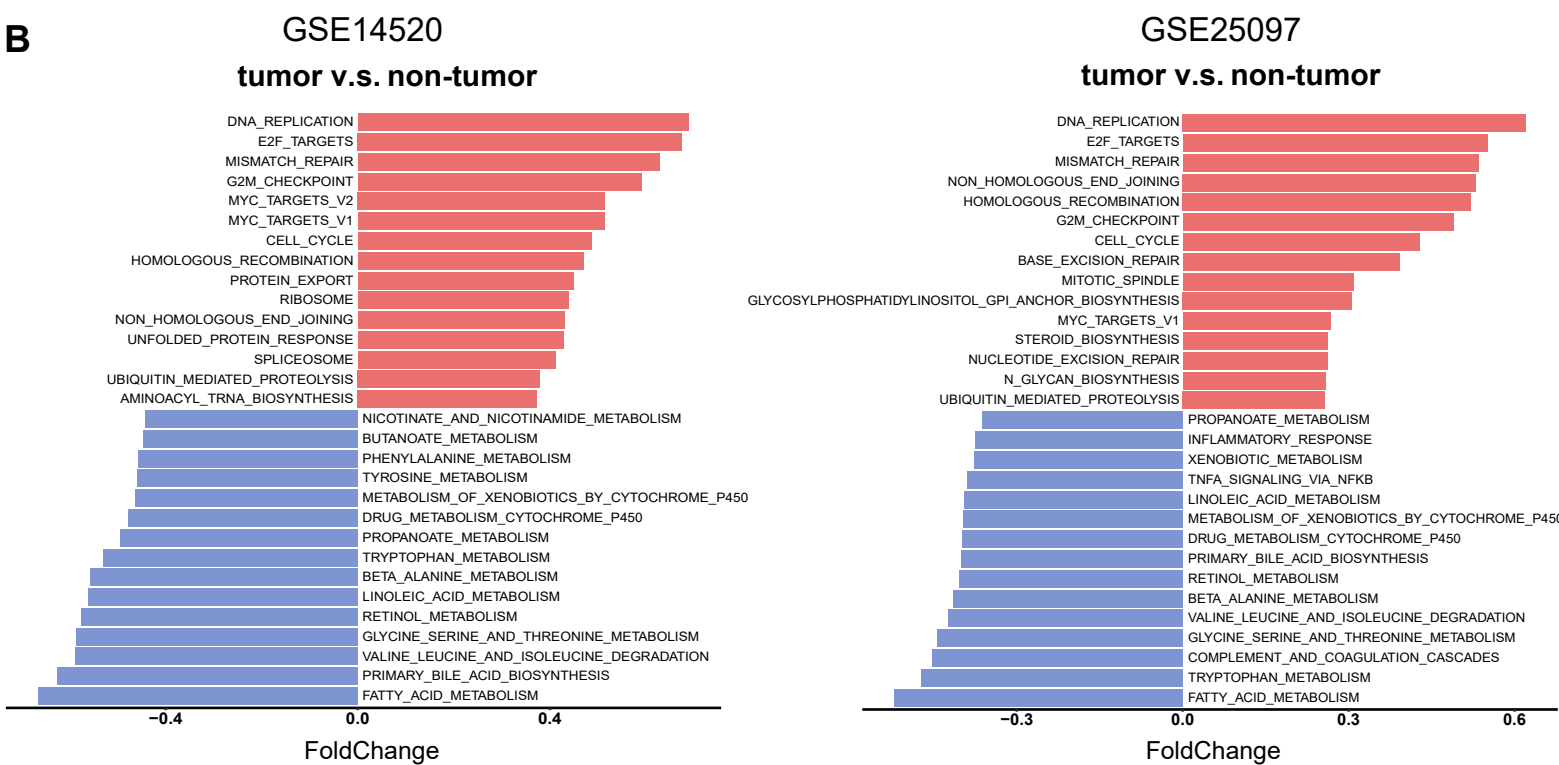

**C**

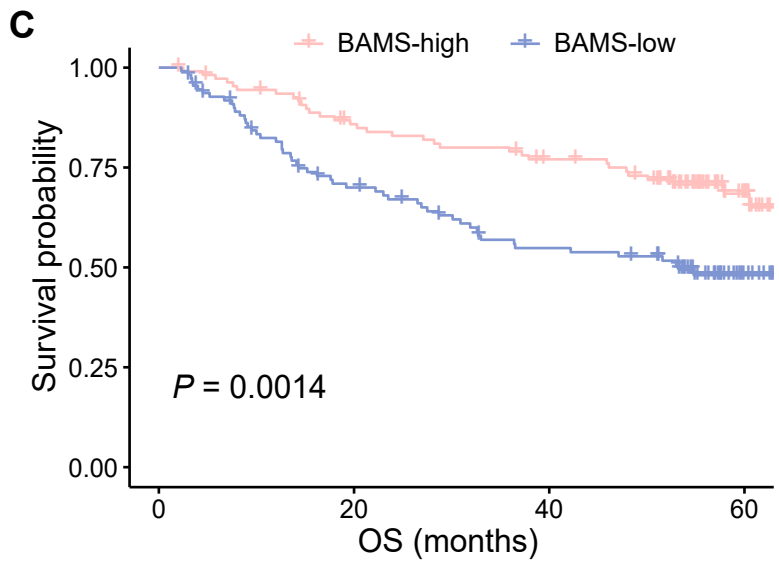

Supplement: s1 [file s1]

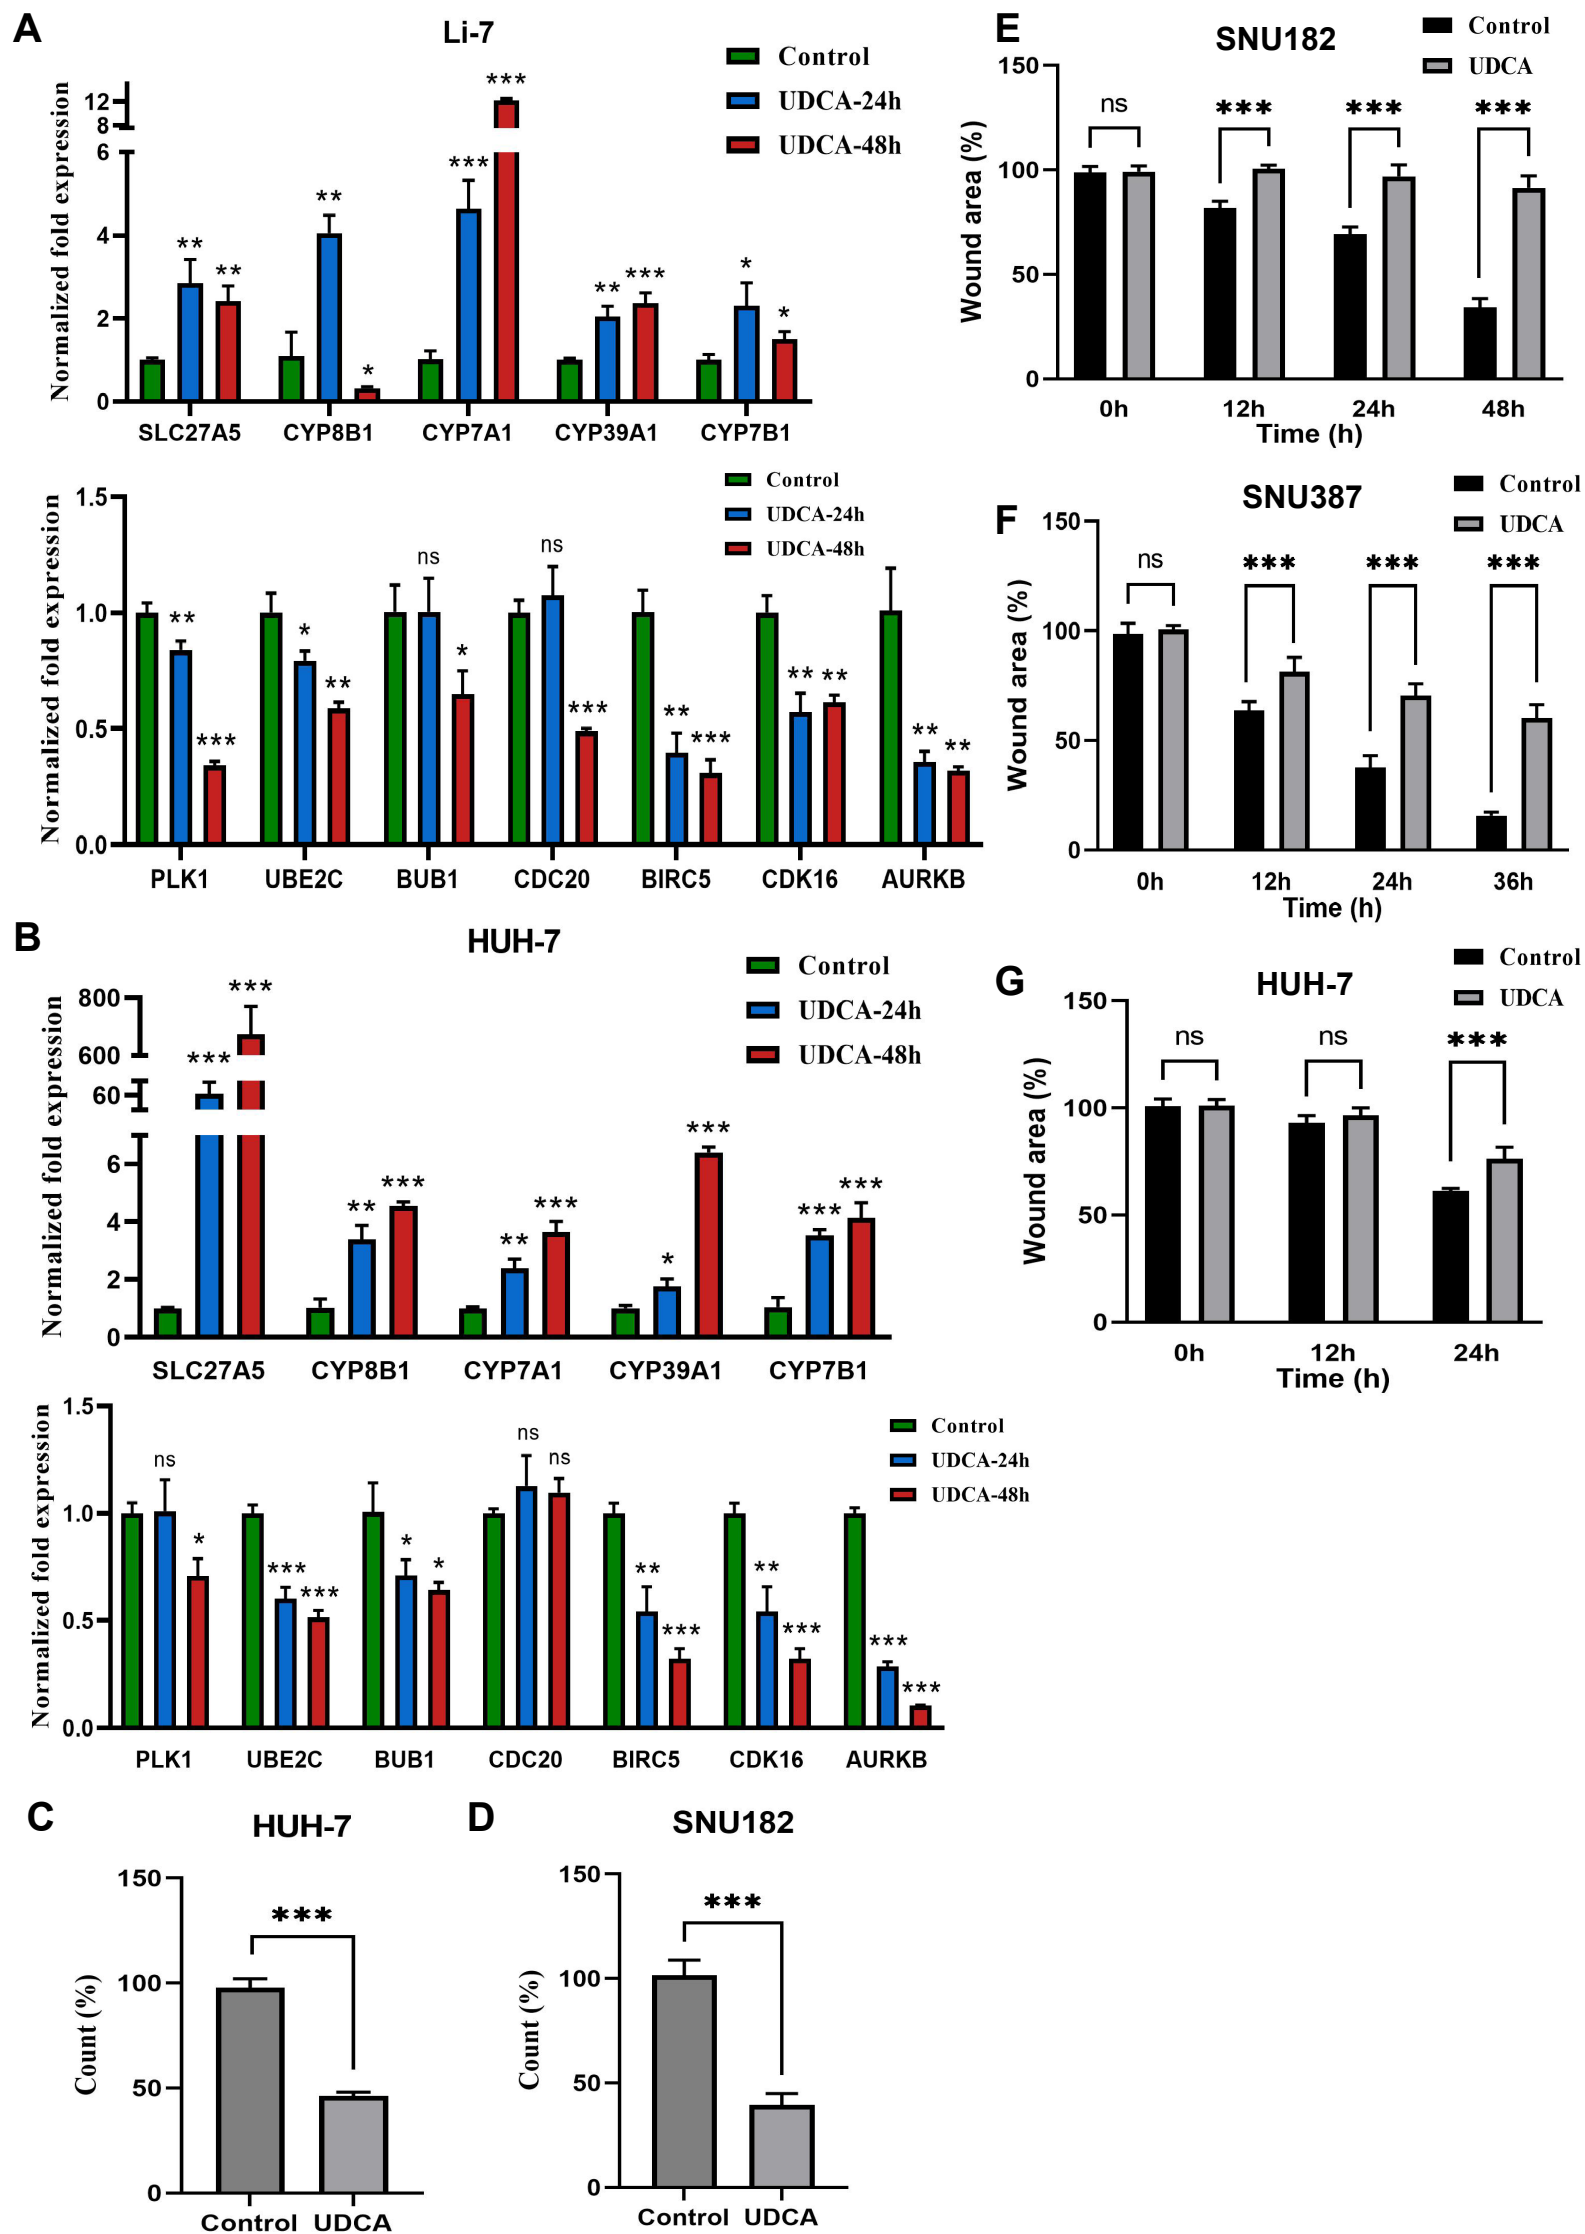

Supplement: s1 [file s1]

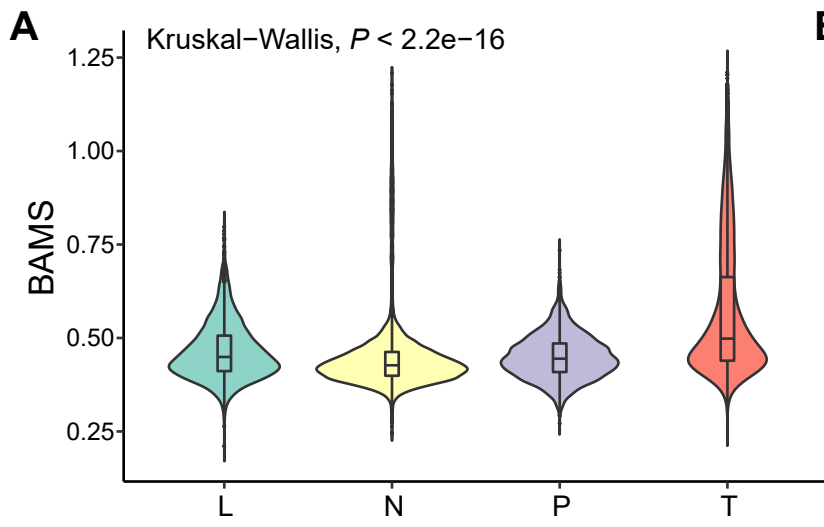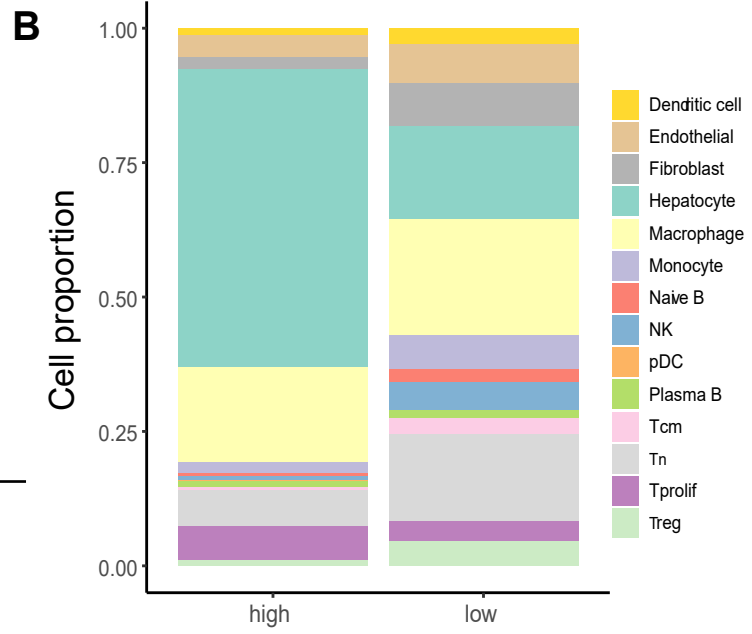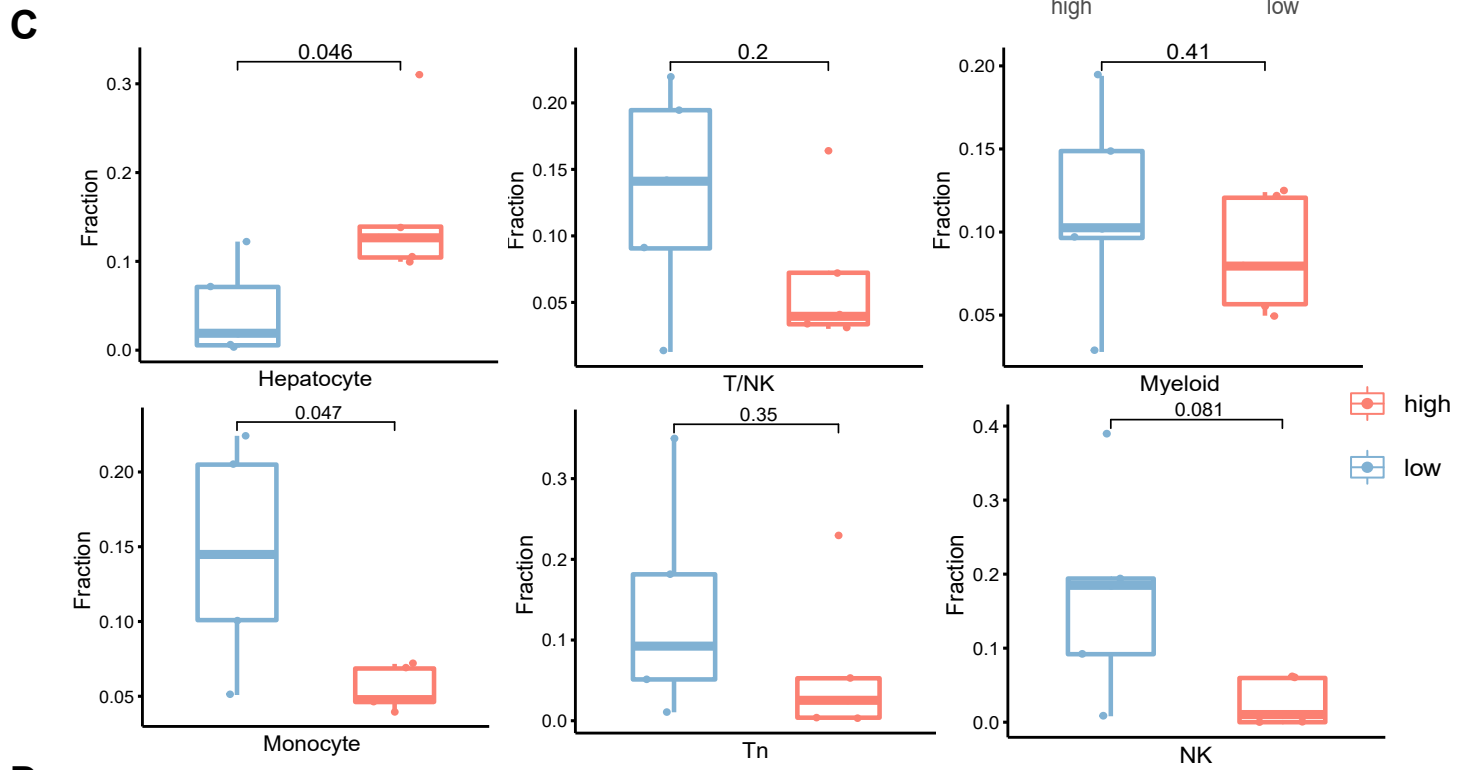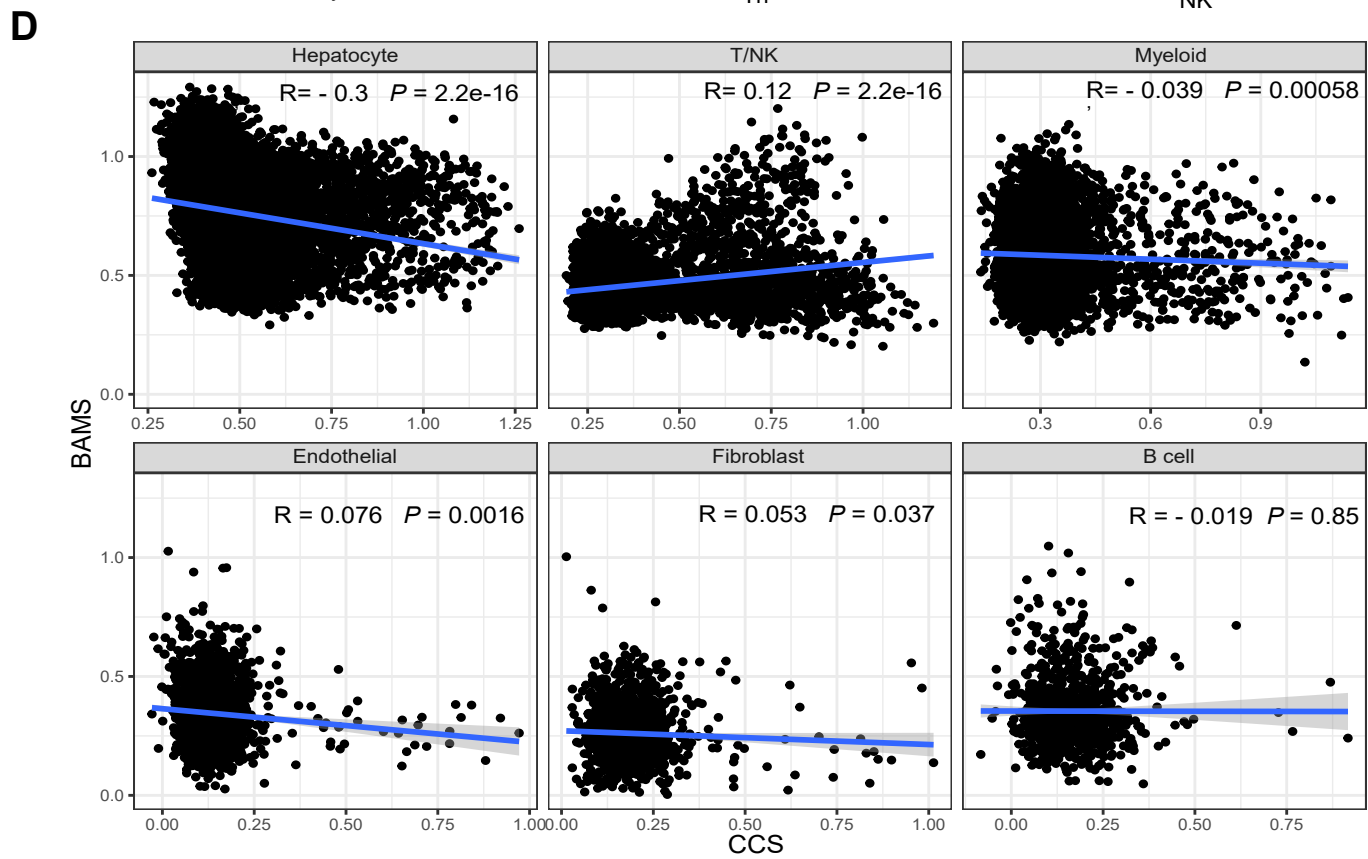

Supplement: s1 [file s1]

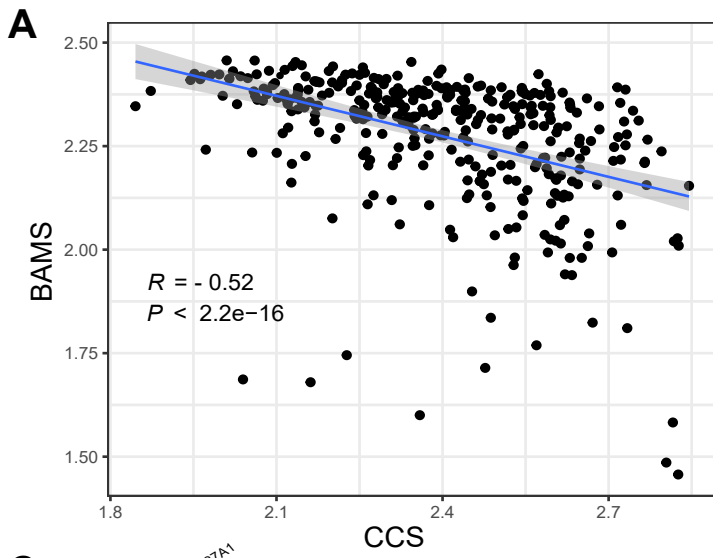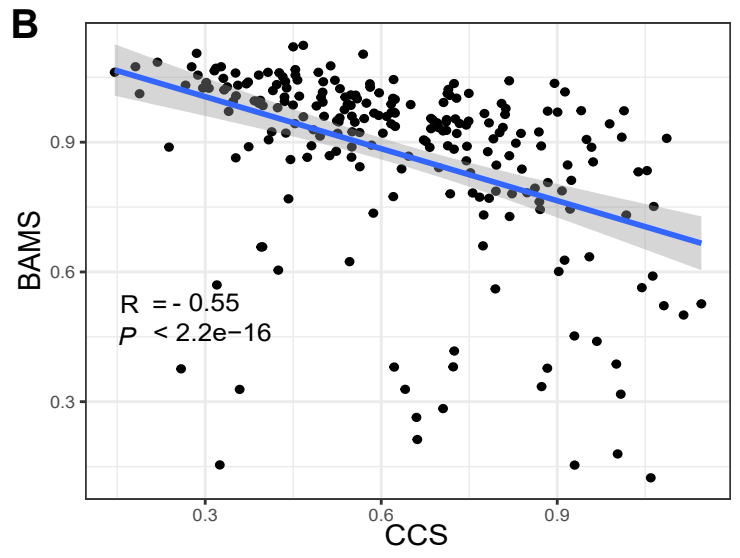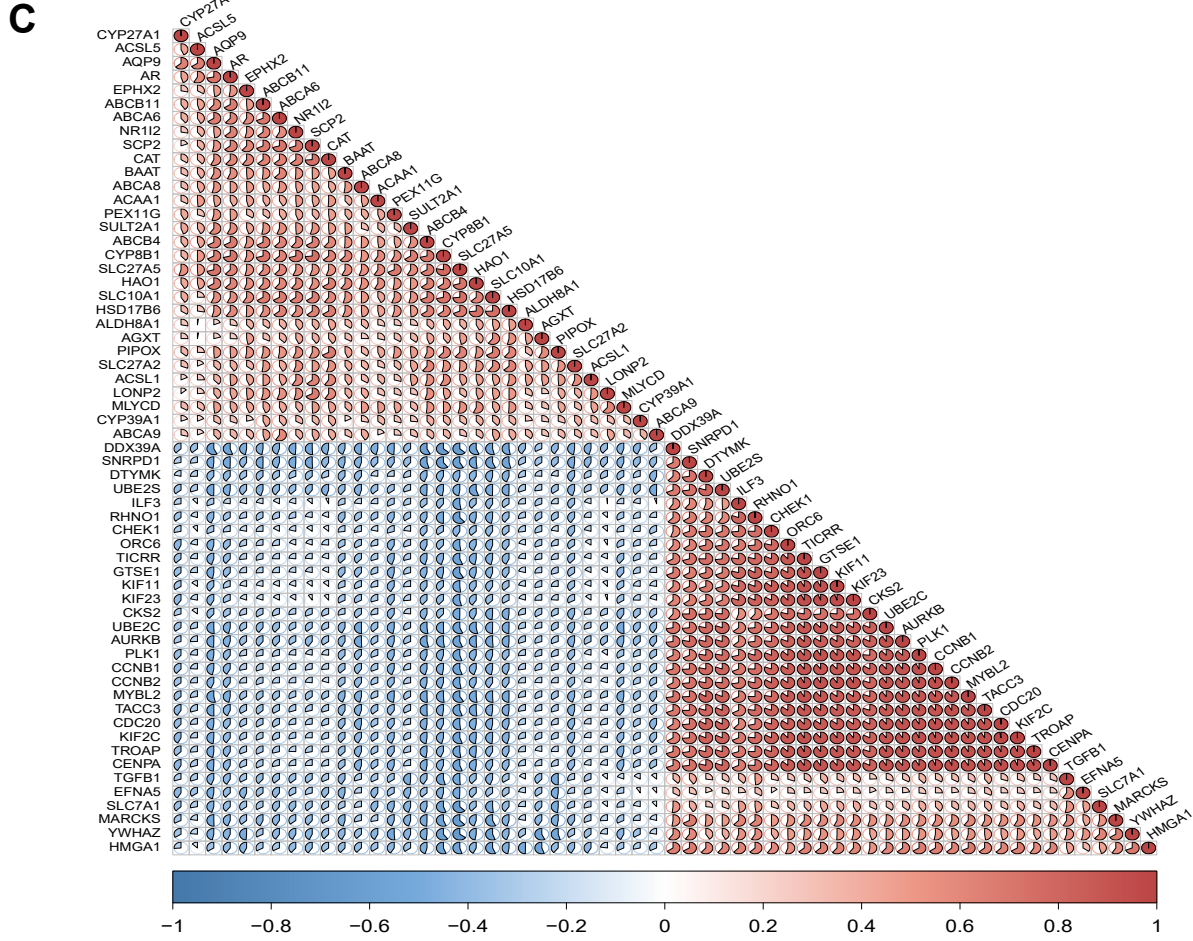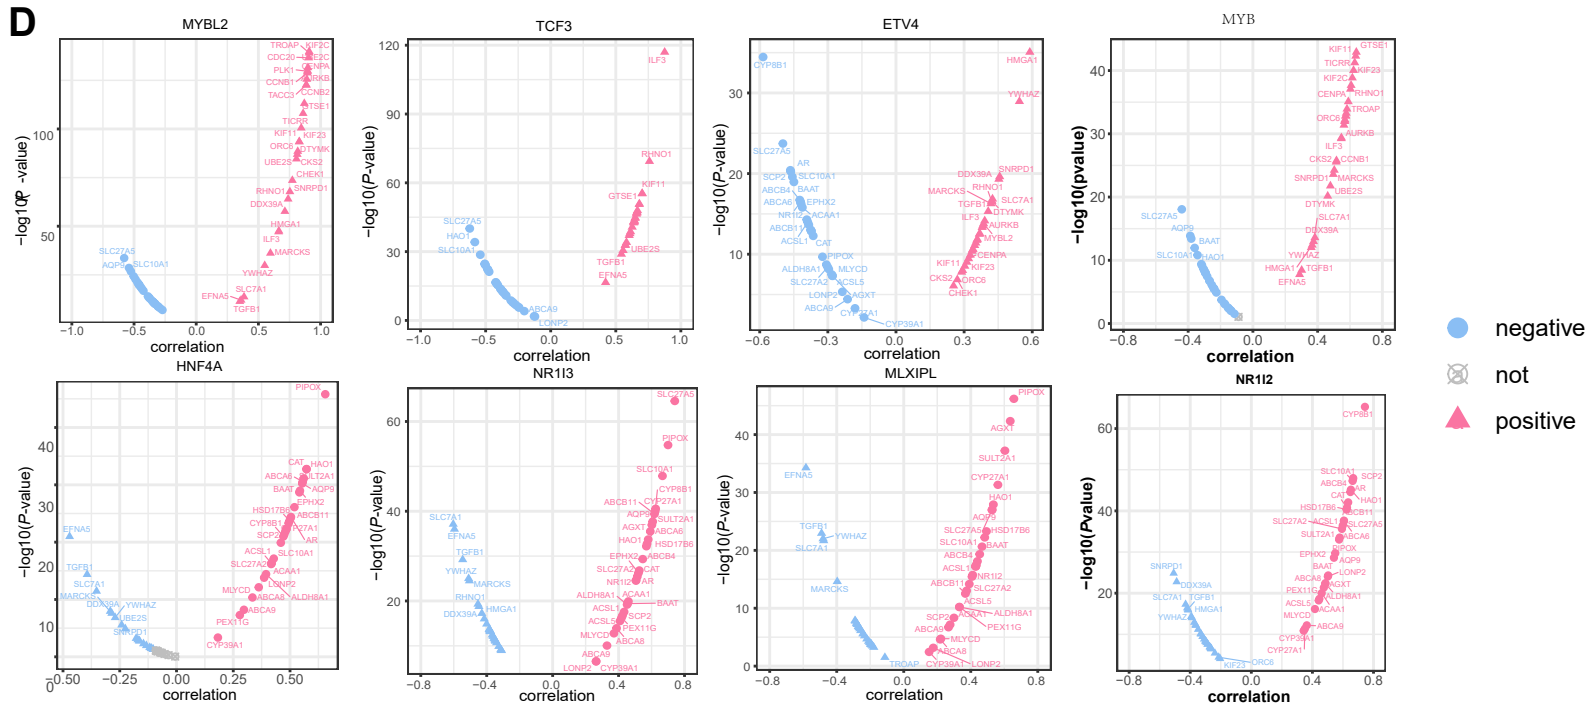

Supplement: s1 [file s1]

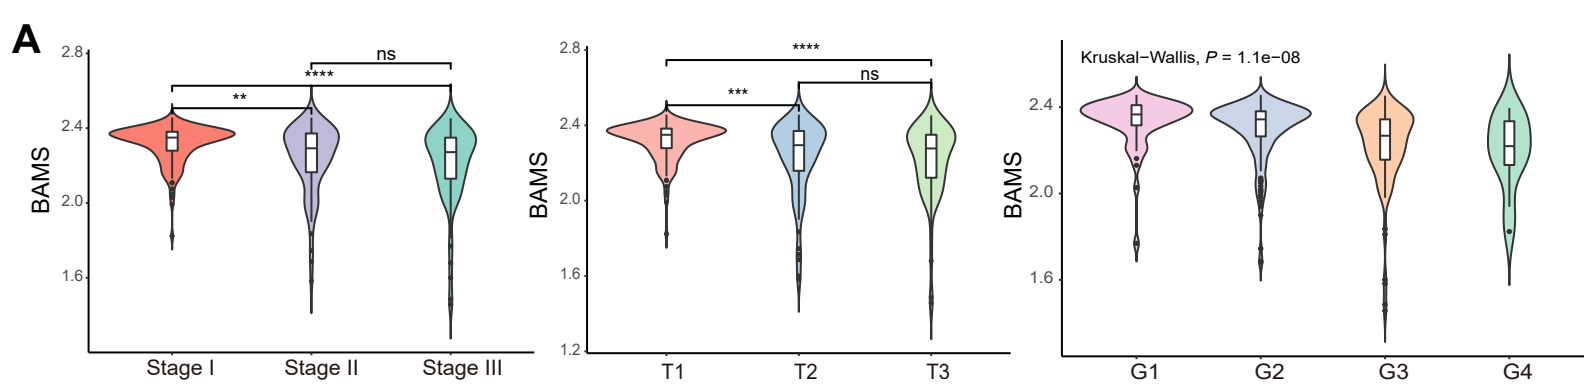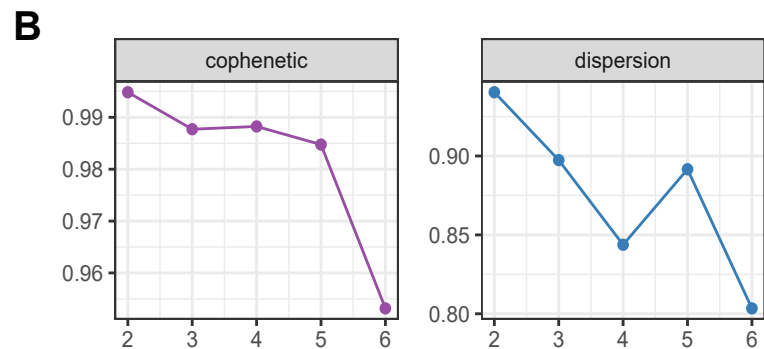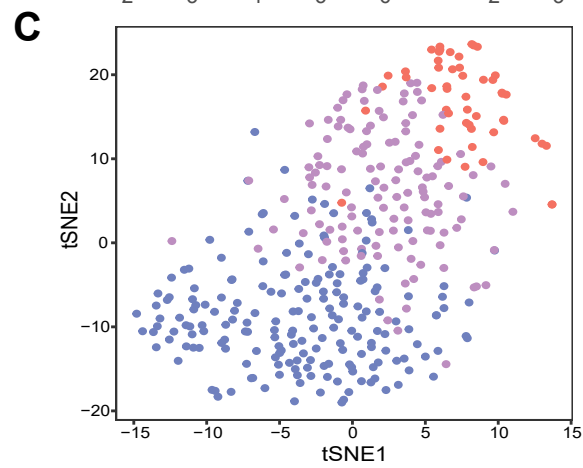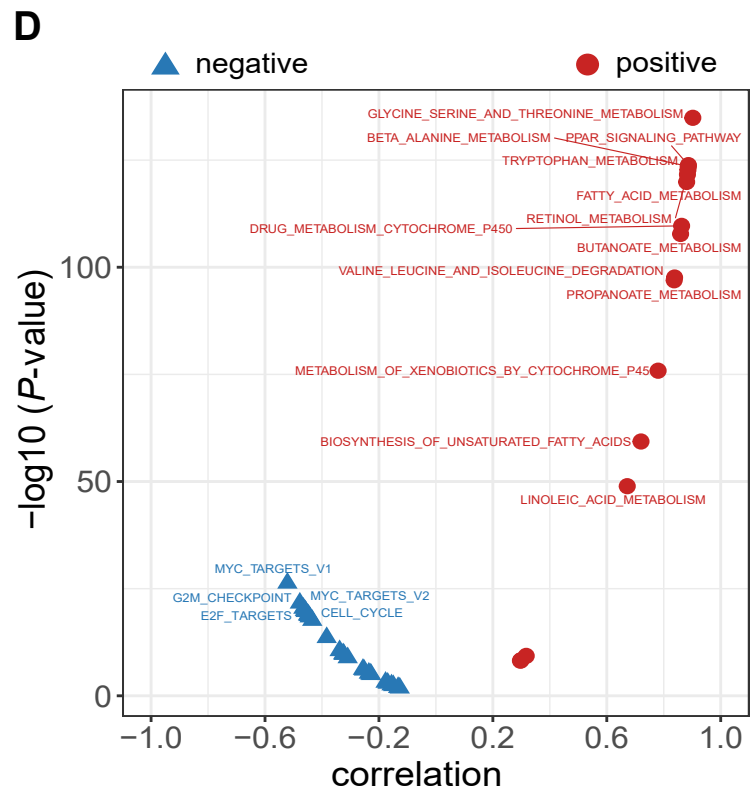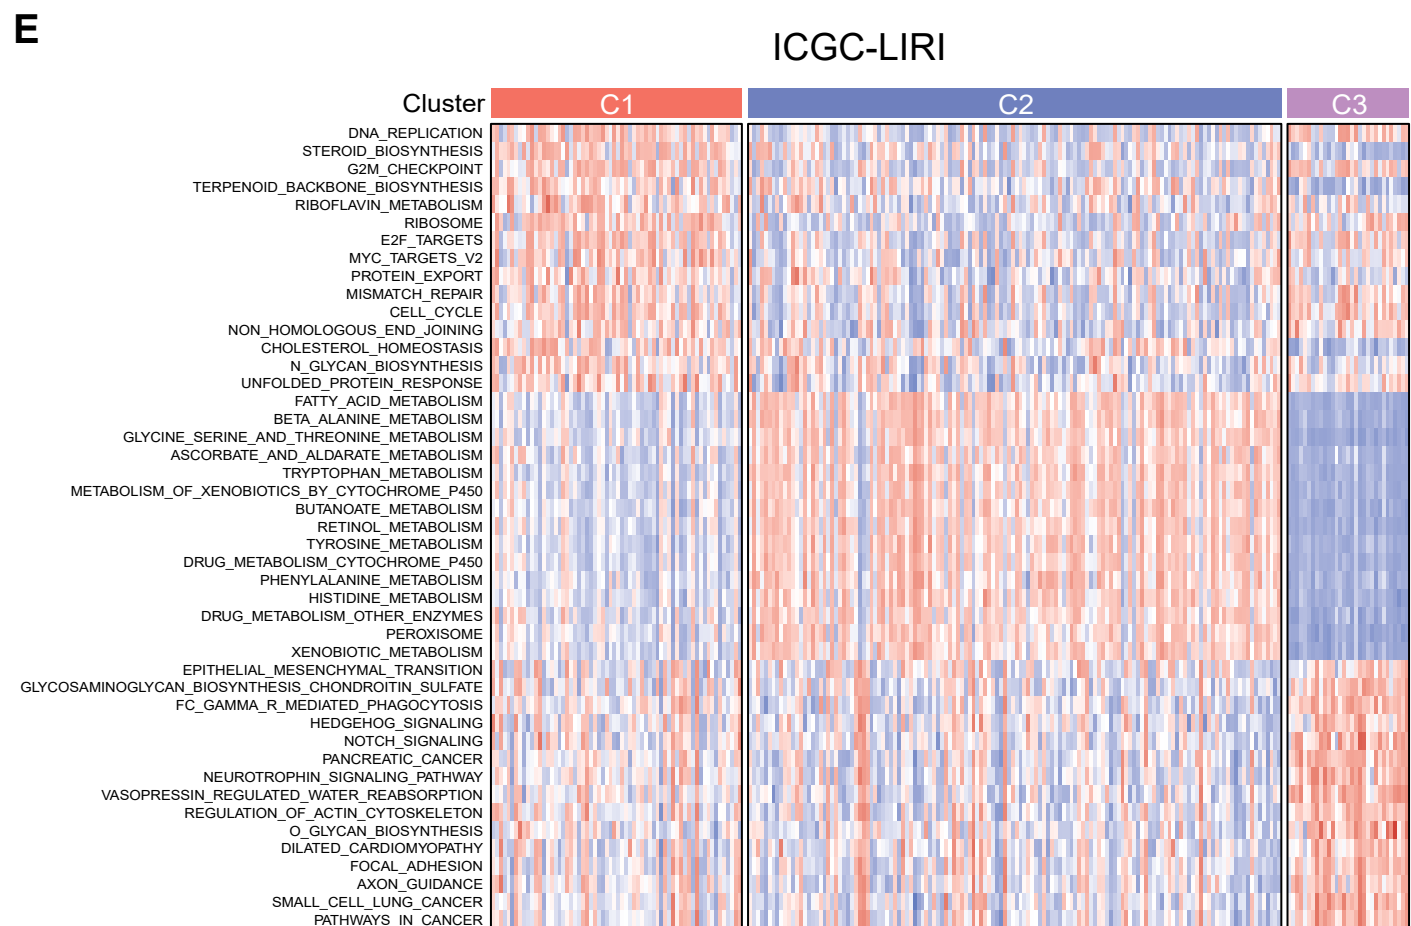

Supplement: s1 [file s1]
